# Supplementary material
Source: PubMed Central journal article supplement (PMC3517039)

## Supporting Information

|                                                          |      |
|----------------------------------------------------------|------|
| <b>I. General information</b>                            | S-1  |
| <b>II. Synthesis of cycloaddition substrates</b>         | S-1  |
| <b>III. [2+2] Photocycloadditions</b>                    | S-7  |
| <b>IV. Synthesis of (±)-cannabiorcicylolic acid</b>      | S-14 |
| <b>V. Photosensitized [2+2] Cycloaddition of 5</b>       | S-15 |
| <b>VI. Time course study of [2+2] cycloaddition of 3</b> | S-16 |
| <b>VII. Representative NOE data</b>                      | S-17 |
| <b>VIII. References</b>                                  | S-18 |
| <b>IX. <sup>1</sup>H and <sup>13</sup>C NMR spectra</b>  | S-19 |

### **I. General information**

Ir(dF(CF<sub>3</sub>)ppy)<sub>2</sub>(dtbbpy)(PF<sub>6</sub>) was prepared as described by Malliaras and Bernhard.<sup>1</sup> MeCN, ether, THF, and CH<sub>2</sub>Cl<sub>2</sub> were purified by elution through alumina as described by Grubbs.<sup>2</sup> A 23W (1380 lumen) compact fluorescent lamp was used for all photochemical reactions. Flash column chromatography was performed with Silicycle 40-63Å silica (230-400 mesh) using the method of Still.<sup>3</sup> Diastereomeric ratios for all compounds were determined by GC or <sup>1</sup>H NMR analysis of the unpurified reaction mixture. <sup>1</sup>H and <sup>13</sup>C NMR data for all previously uncharacterized compounds were obtained using Varian Inova-500 and Varian Unity-500 spectrometers and are referenced to TMS (0.0 ppm) and CDCl<sub>3</sub> (77.0 ppm), respectively. IR spectral data were obtained using a Bruker Vector 22 spectrometer (thin film on NaCl). Melting points were obtained using a Mel-Temp II (Laboratory Devices, Inc., USA) melting point apparatus. Mass spectrometry was performed with a Waters (Micromass) AutoSpec®. These facilities are funded by the NSF (CHE-9974839, CHE-9304546) and the University of Wisconsin.

### **II. Synthesis of cycloaddition substrates**

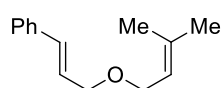

**[(E)-3-(3-Methyl-but-2-enyloxy)-propenyl]-benzene:** A flame-dried 50 mL round-bottomed flask was charged with 60% NaH (240 mg, 6.0 mmol) and dry THF (5 mL). (*E*)-Cinnamyl alcohol (0.67 g, 5.0 mmol) in THF (4 mL) was added dropwise, and the reaction was stirred for an additional 30 min at room temperature. The flask was then cooled to 0 °C, and a solution of 3,3-dimethylallyl bromide (1.0 g, 90% purity, 6.0 mmol) in 6 mL THF was added dropwise. The mixture was allowed to warm slowly to room temperature. After stirring for 12 h, the reaction was quenched by slow addition of saturated NH<sub>4</sub>Cl. The phases were separated, and the aqueous phase was extracted two times with Et<sub>2</sub>O. The combined organic phases were then washed with brine, dried over MgSO<sub>4</sub>, and concentrated by rotary evaporation. The residue was purified by flash-column chromatography using 40:1 hexanes/ethyl acetate as the eluent to afford 0.901 g (4.5 mmol, 89% yield) of a colorless oil. IR(neat) 3026, 2972, 2915, 2852, 1600, 1496, 1449, 1073 cm<sup>-1</sup>. <sup>1</sup>H NMR: (500.2 MHz, CDCl<sub>3</sub>) δ 7.39 (d, J = 7.4 Hz, 2H), 7.31 (t, J = 7.8 Hz, 2H), 7.23 (t, J = 7.4 Hz, 1H), 6.61 (d, J = 15.7 Hz, 1H), 6.31 (dt, J = 15.7, 6.3 Hz, 1H), 5.42-5.37 (m, 1H), 4.14 (dd, J = 6.1, 1.4 Hz, 2H), 4.02 (d, J = 6.9 Hz, 2H), 1.76 (s, 3H), 1.69 (s, 3H); <sup>13</sup>C NMR: (125.7 MHz, CDCl<sub>3</sub>) δ 137.2, 136.8, 132.3, 128.5, 127.6, 126.45, 126.39, 121.0, 70.6, 66.6, 25.8, 18.0. HRMS (EI) calculated for [C<sub>14</sub>H<sub>18</sub>O]<sup>+</sup>(M<sup>+</sup>) requires *m/z* 202.1353, found *m/z* 202.1345.

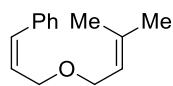

**[(Z)-3-(3-Methyl-but-2-enyloxy)-propenyl]-benzene:** A flame-dried 50 mL round-bottomed flask was charged with (*Z*)-cinnamyl alcohol<sup>4</sup> (670 mg, 5.0 mmol), 3,3-dimethylallyl bromide (1.0 g, 90% purity, 6.0 mmol) and DMF (5 mL). The flask was then cooled to 0 °C, and 60% NaH (240 mg, 6 mmol) was added. The mixture was warmed to room temperature, and the reaction was monitored by TLC. After stirring for 4 h, the reaction was quenched by the slow addition of saturated NH<sub>4</sub>Cl. The phases were separated, and the aqueous phase was extracted two times with Et<sub>2</sub>O. The combined organic phases were then washed with brine, dried over MgSO<sub>4</sub>, and concentrated by rotary evaporation. The crude mixture could

then be purified by flash-column chromatography using 40:1 hexanes/ethyl acetate as the eluent to afford 821 mg (4.1 mmol, 81%) of a colorless oil. IR(neat) 3024, 2972, 2914, 2957, 1676, 1495, 1448, 1085  $\text{cm}^{-1}$ .  $^1\text{H}$  NMR: (499.9 MHz,  $\text{CDCl}_3$ )  $\delta$  7.36-7.31 (m, 2H), 7.27-7.23 (m, 1H), 7.23-7.20 (m, 2H), 6.59 (d,  $J = 11.9$  Hz, 1H), 5.87 (dt,  $J = 11.9, 6.4$  Hz, 1H), 5.39-5.34 (m, 1H), 4.24 (dd,  $J = 6.4, 1.8$  Hz, 2H), 3.97 (d,  $J = 7.0$  Hz, 2H), 1.73 (s, 3H), 1.65 (s, 3H);  $^{13}\text{C}$  NMR: (125.7 MHz,  $\text{CDCl}_3$ )  $\delta$  137.3, 136.7, 131.4, 129.3, 128.8, 128.1, 127.1, 120.9, 66.74, 66.69, 25.8, 17.9. HRMS (EI) calculated for  $[\text{C}_{14}\text{H}_{18}\text{O}]^+(\text{M}^+)$  requires  $m/z$  202.1353, found  $m/z$  202.1348.

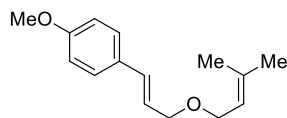

**1-Methoxy-4-[(*E*)-3-(3-Methyl-but-2-enyloxy)-propenyl]-benzene:** A flame-dried 50 mL round-bottomed flask was charged with 60% NaH (144 mg, 3.6 mmol) and dry THF (5 mL). (*E*)-4-Methoxycinnamyl alcohol<sup>5</sup> (492 mg, 3.0 mmol) in THF (4 mL) was added dropwise, and the reaction was stirred for an additional 30 min at room temperature. The flask was then cooled to 0 °C, and a solution of 3,3-dimethylallyl bromide (546 mg, 90% purity, 3.3 mmol) in 6 mL THF was added dropwise. The mixture was allowed to warm slowly to room temperature. After stirring for 12 h, the reaction was quenched by slow addition of saturated  $\text{NH}_4\text{Cl}$ . The phases were separated, and the aqueous phase was extracted two times with  $\text{Et}_2\text{O}$ . The combined organic phases were then washed with brine, dried over  $\text{MgSO}_4$ , and concentrated by rotary evaporation. The residue was purified by flash-column chromatography using 40:1 hexanes/ethyl acetate as the eluent to afford 571 mg (2.5 mmol, 82%) of a colorless oil. IR(neat) 2915, 2836, 1577, 1462, 1249, 1174  $\text{cm}^{-1}$ .  $^1\text{H}$  NMR: (500.2 MHz,  $\text{CDCl}_3$ )  $\delta$  7.32 (d,  $J = 8.7$  Hz, 2H), 6.85 (d,  $J = 8.7$  Hz, 2H), 6.55 (d,  $J = 15.9$  Hz, 1H), 6.17 (dt,  $J = 15.9, 6.4$  Hz, 1H), 5.42-5.36 (m, 1H), 4.11 (dd,  $J = 5.0, 1.2$  Hz, 2H), 4.01 (d,  $J = 7.1$  Hz, 2H), 3.80 (s, 3H), 1.76 (s, 3H), 1.69 (s, 3H);  $^{13}\text{C}$  NMR: (125.7 MHz,  $\text{CDCl}_3$ )  $\delta$  159.2, 137.1, 132.0, 129.6, 127.6, 124.1, 121.1, 113.9, 70.8, 66.5, 55.2, 25.8, 18.0. HRMS (EI) calculated for  $[\text{C}_{15}\text{H}_{20}\text{O}_2]^+(\text{M}^+)$  requires  $m/z$  232.1458, found  $m/z$  232.1462.

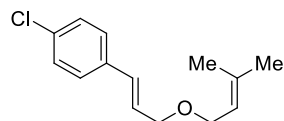

**1-Chloro-4-[(*E*)-3-(3-Methyl-but-2-enyloxy)-propenyl]-benzene:** A flame-dried 50 mL round-bottomed flask was charged with (*E*)-4-chlorocinnamyl alcohol<sup>6</sup> (843 mg, 5.0 mmol), 3,3-dimethylallyl bromide (1.0g, purity: 90%, 6.0 mmol), and dry DMF (5 mL). The mixture was cooled to 0 °C and added with 60% NaH (240 mg, 6.0 mmol), then allowed to warm slowly to room temperature. After stirring for 12 h, the reaction was quenched by slow addition of saturated  $\text{NH}_4\text{Cl}$ . The phases were separated, and the aqueous phase was extracted two times with  $\text{Et}_2\text{O}$ . The combined organic phases were then washed with brine, dried over  $\text{MgSO}_4$ , and concentrated by rotary evaporation. The residue was purified by flash-column chromatography using 40:1 hexanes/ethyl acetate as the eluent to afford 1.072 g (4.5 mmol, 91%) of a colorless oil. IR(neat) 2972, 2915, 2864, 1675, 1594, 1491, 1448, 1090  $\text{cm}^{-1}$ .  $^1\text{H}$  NMR: (500.2 MHz,  $\text{CDCl}_3$ )  $\delta$  7.32-7.25 (m, 4H), 6.56 (d,  $J = 15.9$  Hz, 1H), 6.28 (dt,  $J = 15.9, 6.0$  Hz, 1H), 5.41-5.36 (m, 1H), 4.12 (dd,  $J = 5.9, 1.5$  Hz, 2H), 4.02 (d,  $J = 7.1$  Hz, 2H), 1.76 (s, 3H), 1.69 (s, 3H);  $^{13}\text{C}$  NMR: (125.7 MHz,  $\text{CDCl}_3$ )  $\delta$  137.3, 135.3, 133.2, 130.9, 128.7, 127.6, 127.1, 121.0, 70.4, 66.7, 25.8, 18.0. HRMS (EI) calculated for  $[\text{C}_{14}\text{H}_{17}\text{ClO}]^+(\text{M}^+)$  requires  $m/z$  236.0963, found  $m/z$  236.0954.

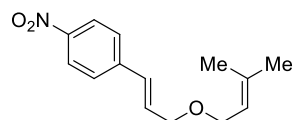

**1-Nitro-4-[(*E*)-3-(3-Methyl-but-2-enyloxy)-propenyl]-benzene:** A flame-dried 50 mL round-bottomed flask was charged with (*E*)-4-nitrocinnamyl alcohol (895 mg, 5.0 mmol), 3,3-dimethylallyl bromide (1.0g, purity: 90%, 6.0 mmol), and dry DMF (5 mL). The mixture was cooled to 0 °C and added with 60% NaH (240 mg, 6.0 mmol), then allowed to warm slowly to room temperature. After stirring for 12 h, the reaction was quenched by slow addition of saturated  $\text{NH}_4\text{Cl}$ . The phases were separated, and the aqueous phase was extracted two times with  $\text{Et}_2\text{O}$ . The combined organic phases were then washed with brine, dried over  $\text{MgSO}_4$ , and concentrated by rotary evaporation. The residue was purified by flash-column chromatography using 10:1 hexanes/ethyl acetate as the eluent to afford 986 mg (4.0 mmol, 80%) of a yellow oil. IR(neat) 2972, 2915, 2851, 1596, 1517, 1342  $\text{cm}^{-1}$ .  $^1\text{H}$  NMR: (500.2 MHz,  $\text{CDCl}_3$ )  $\delta$  8.17 (d,  $J = 8.8$  Hz, 2H), 7.51 (d,  $J = 8.8$  Hz, 2H), 6.69 (d,  $J = 16.0$  Hz, 1H), 6.49 (dt,  $J = 16.0, 5.4$  Hz, 1H), 5.42-5.37 (m, 1H), 4.18 (dd,  $J = 5.4, 1.5$  Hz, 2H), 4.05 (d,  $J = 7.1$  Hz, 2H), 1.77 (s, 3H), 1.70 (s, 3H);  $^{13}\text{C}$  NMR: (125.7 MHz,  $\text{CDCl}_3$ )  $\delta$  146.9, 143.3, 137.6, 131.6, 129.4, 126.9, 124.0, 120.7, 69.9, 67.1, 25.8, 18.0; HRMS (EI) calculated for  $[\text{C}_{14}\text{H}_{17}\text{NO}_3]^+(\text{M}^+)$  requires  $m/z$  247.1203, found  $m/z$  247.1213.

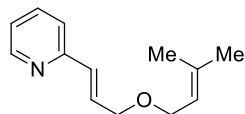

**2-[(*E*)-3-(3-Methyl-but-2-enyloxy)-propenyl]-pyridine:** A flame-dried 50 mL round-bottomed flask was charged with (*E*)-3-(2'-pyridinyl)allyl alcohol<sup>7</sup> (675 mg, 5.0 mmol), 3,3-dimethylallyl bromide (1.0g, purity: 90%, 6.0 mmol), and dry DMF (5 mL). The mixture was cooled to 0 °C and added with 60% NaH (240 mg, 6.0 mmol), then allowed to

warm slowly to room temperature. After stirring for 12 h, the reaction was quenched by slow addition of saturated  $\text{NH}_4\text{Cl}$ . The phases were separated, and the aqueous phase was extracted two times with  $\text{Et}_2\text{O}$ . The combined organic phases were then washed with brine, dried over  $\text{MgSO}_4$ , and concentrated by rotary evaporation. The residue was purified by flash-column chromatography using 2:1 hexanes/ethyl acetate as the eluent to afford 701 mg (3.5 mmol, 69%) of a colorless oil. IR(neat) 2972, 2914, 2853, 1659, 1587, 1565, 1470, 1431, 1115  $\text{cm}^{-1}$ .  $^1\text{H}$  NMR: (500.2 MHz,  $\text{CDCl}_3$ )  $\delta$  8.55 (d,  $J = 4.6$  Hz, 1H), 7.64-7.59 (m, 1H), 7.29 (d,  $J = 7.9$  Hz, 1H), 7.14-7.09 (m, 1H), 6.79 (dt,  $J = 16.0, 5.4$  Hz, 1H), 6.72 (d,  $J = 16.0$  Hz, 1H), 5.42-5.37 (m, 1H), 4.20 (dd,  $J = 5.4, 1.4$  Hz, 2H), 4.04 (d,  $J = 7.1$  Hz, 2H), 1.76 (s, 3H), 1.69 (s, 3H);  $^{13}\text{C}$  NMR: (125.7 MHz,  $\text{CDCl}_3$ )  $\delta$  155.3, 149.4, 137.1, 136.4, 131.2, 131.1, 122.0, 121.4, 121.0, 69.9, 66.8, 25.7, 18.0. HRMS (EI) calculated for  $[\text{C}_{13}\text{H}_{17}\text{NO}]^+(\text{M}^+)$  requires  $m/z$  203.1305, found  $m/z$  203.1311.

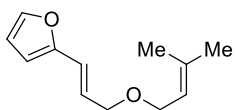

**2-[(E)-3-(3-Methyl-but-2-enyloxy)-propenyl]-furan:** A flame-dried 50 mL round-bottomed flask was charged with (*E*)-3-(2'-furyl)allyl alcohol<sup>8</sup> (620 mg, 5.0 mmol), 3,3-dimethylallyl bromide (1.0g, purity: 90%, 6.0 mmol), and dry DMF (5 mL). The mixture was cooled to 0 °C and added with 60% NaH (240 mg, 6.0 mmol), then allowed to warm slowly to room temperature. After stirring for 12 h, the reaction was quenched by slow addition of saturated  $\text{NH}_4\text{Cl}$ . The phases were separated, and the aqueous phase was extracted two times with  $\text{Et}_2\text{O}$ . The combined organic phases were then washed with brine, dried over  $\text{MgSO}_4$ , and concentrated by rotary evaporation. The residue was purified by flash-column chromatography using 40:1 hexanes/ethyl acetate as the eluent to afford 654 mg (3.4 mmol, 68%) of a colorless oil. IR(neat) 2972, 2916, 2854, 1675, 1490, 1377, 1113  $\text{cm}^{-1}$ .  $^1\text{H}$  NMR: (500.2 MHz,  $\text{CDCl}_3$ )  $\delta$  7.34 (d,  $J = 1.4$  Hz, 1H), 6.43 (d,  $J = 15.9$  Hz, 1H), 6.36-6.34 (m, 1H), 6.26-6.20 (m, 2H), 5.41-5.36 (m, 1H), 4.10 (dd,  $J = 5.9, 1.5$  Hz, 2H), 4.00 (d,  $J = 7.1$  Hz, 2H), 1.76 (s, 3H), 1.68 (s, 3H);  $^{13}\text{C}$  NMR: (125.7 MHz,  $\text{CDCl}_3$ )  $\delta$  152.5, 141.9, 137.1, 125.1, 121.0, 120.3, 111.2, 107.7, 70.0, 66.6, 25.8, 18.0. HRMS (EI) calculated for  $[\text{C}_{12}\text{H}_{16}\text{O}_2]^+(\text{M}^+)$  requires  $m/z$  192.1145, found  $m/z$  192.1146.

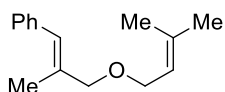

**[(E)-2-Methyl-3-(3-methyl-but-2-enyloxy)-propenyl]-benzene:** A flame-dried 50 mL round-bottomed flask was charged with (*E*)-2-methylcinnamyl alcohol (740 mg, 5.0 mmol), 3,3-dimethylallyl bromide (1.0g, purity: 90%, 6.0 mmol), and dry DMF (5 mL). The mixture was cooled to 0 °C and added with 60% NaH (240 mg, 6.0 mmol), then allowed to warm slowly to room temperature. After stirring for 12 h, the reaction was quenched by slow addition of saturated  $\text{NH}_4\text{Cl}$ . The phases were separated, and the aqueous phase was extracted two times with  $\text{Et}_2\text{O}$ . The combined organic phases were then washed with brine, dried over  $\text{MgSO}_4$ , and concentrated by rotary evaporation. The residue was purified by flash-column chromatography using 40:1 hexanes/ethyl acetate as the eluent to afford 807 mg (3.7 mmol, 75%) of a colorless oil. IR(neat) 2972, 2915, 2855, 1676, 1600, 1491, 1445, 1073  $\text{cm}^{-1}$ .  $^1\text{H}$  NMR: (500.2 MHz,  $\text{CDCl}_3$ )  $\delta$  7.33 (t,  $J = 7.9$  Hz, 2H), 7.30-7.27 (m, 2H), 7.21 (t,  $J = 7.1$  Hz, 1H), 6.51 (s, 1H), 5.43-5.38 (m, 1H), 4.02 (s, 2H), 3.99 (d,  $J = 7.1$  Hz, 2H), 1.90 (d,  $J = 1.2$  Hz, 3H), 1.77 (s, 3H), 1.69 (s, 3H);  $^{13}\text{C}$  NMR: (125.7 MHz,  $\text{CDCl}_3$ )  $\delta$  137.6, 137.0, 135.5, 128.9, 128.1, 126.8, 126.3, 121.2, 76.2, 66.3, 25.8, 18.0, 15.5. HRMS (EI) calculated for  $[\text{C}_{14}\text{H}_{17}\text{O}]^+(\text{M}-\text{CH}_3)^+$  requires  $m/z$  201.1274, found  $m/z$  201.1265.

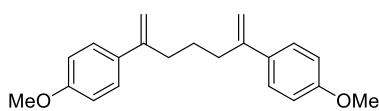

**2,6-Di(4-methoxyphenyl)-1,6-heptadiene:**<sup>9</sup> A solution of methyltriphenylphosphonium bromide (5.36 mg, 15 mmol) in dry THF (20 mL) was placed in a flame-dried 50 mL round-bottomed flask. *n*-Butyllithium (6 mL, 2.5 M in hexanes, 15 mmol) was then added dropwise at 0 °C, and the reaction was stirred for an additional 30 min. 1,5-Bis-(4-methoxy-phenyl)-pentane-1,5-dione<sup>10</sup> (1.56 g, 5 mmol) was added to the reaction mixture, and the reaction was stirred for an additional 4 h at room temperature. The reaction was cooled to 0 °C, quenched with 1 mL water, and eluted through a plug of silica gel with diethyl ether. The filtrate was concentrated by rotary evaporation. The crude mixture was then purified by flash-column chromatography using 20:1 hexanes/EtOAc as the eluent to give 1.070 g (3.5 mmol, 69%) of a white solid. Mp: 48-50 °C (hexane/EtOAc). IR(neat) 2955, 2935, 2837, 1607, 1513, 1248  $\text{cm}^{-1}$ .  $^1\text{H}$  NMR: (500.2 MHz,  $\text{CDCl}_3$ )  $\delta$  7.29 (d,  $J = 8.8$  Hz, 4H), 6.83 (d,  $J = 8.8$  Hz, 4H), 5.20 (d,  $J = 1.4$  Hz, 2H), 4.96 (d,  $J = 1.4$  Hz, 2H), 3.80 (s, 6H), 2.50 (t,  $J = 7.9$  Hz, 4H), 1.64-1.57 (m, 2H);  $^{13}\text{C}$  NMR: (125.8 MHz,  $\text{CDCl}_3$ )  $\delta$  158.9, 147.5, 133.5, 127.2, 113.6, 110.9, 55.2, 34.8, 26.7. HRMS (EI) calculated for  $[\text{C}_{21}\text{H}_{24}\text{O}_2]^+(\text{M}^+)$  requires  $m/z$  308.1771, found  $m/z$  308.1773.

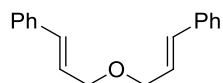

**(*E,E'*)-Dicinnamyl ether:** A flame-dried 50 mL round-bottomed flask was charged with 60% NaH (480 mg, 12 mmol) and dry THF (10 mL). (*E*)-Cinnamyl alcohol (1.34 g, 10 mmol) in THF (8 mL) was added dropwise, and the reaction was stirred for an additional 30 min at room temperature. The flask was then cooled to 0 °C, and a solution of (*E*)-cinnamyl bromide (2.17 g, 11 mmol) in THF (12 mL) was added dropwise. The mixture was allowed to warm slowly to room temperature. After stirring for 12 h, the reaction was quenched by slow addition of saturated NH<sub>4</sub>Cl. The phases were separated, and the aqueous phase was extracted two times with Et<sub>2</sub>O. The combined organic phases were then washed with brine, dried over MgSO<sub>4</sub>, and concentrated by rotary evaporation. The residue was purified by flash-column chromatography using 40:1 hexanes/ethyl acetate as the eluent to afford 2.07 g (8.3 mmol, 83% yield) of a white solid. Mp: 40-41 °C (hexane/EtOAc). All analytical data were consistent with previously reported values.<sup>11</sup>

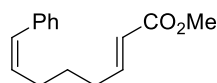

**(*2E,7Z*)-8-Phenyl-octa-2,7-dienoic acid methyl ester:** A solution of (*Z*)-6-phenylhex-5-enal (528 mg, 3.0 mmol) and (methoxycarbonylmethylene)triphenylphosphorane<sup>12</sup> (1.20 g, 3.6 mmol) in CH<sub>2</sub>Cl<sub>2</sub> (5 mL) was placed in a round-bottomed flask. The mixture was stirred 12 h and then concentrated *in vacuo*. The crude residue was purified by flash column chromatography (20:1 hexanes/EtOAc) to afford 0.61 g (2.7 mmol, 88% yield) of the title compound as an oil. IR(neat) 3009, 2948, 2858, 1725, 1658, 1436, 1271 cm<sup>-1</sup>. <sup>1</sup>H NMR: (500.2 MHz, CDCl<sub>3</sub>) δ 7.35-7.30 (m, 2H), 7.26-7.20 (m, 3H), 6.95 (dt, J = 15.6, 7.3 Hz, 1H), 6.45 (d, J = 11.6 Hz, 1H), 5.79 (dt, J = 15.6, 1.7 Hz, 1H), 5.63 (dt, J = 11.6, 7.3 Hz, 1H), 3.71 (s, 3H), 2.36 (2, J = 7.3, 1.7 Hz, 2H), 2.22 (qd, J = 7.3, 1.4 Hz, 2H), 1.65-1.58 (m, 2H); <sup>13</sup>C NMR: (125.7 MHz, CDCl<sub>3</sub>) δ 167.0, 149.0, 137.5, 131.8, 129.6, 128.7, 128.1, 126.6, 121.2, 51.4, 31.7, 28.2, 27.9. HRMS (EI) calculated for [C<sub>15</sub>H<sub>18</sub>O<sub>2</sub>]<sup>+</sup>(M<sup>+</sup>) requires *m/z* 230.1302, found *m/z* 230.1290.

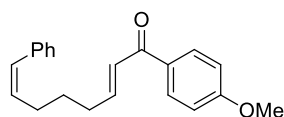

**(*2E,7Z*)-1-(4-Methoxy-phenyl)-8-phenyl-octa-2,7-dien-1-one:** A solution of (*Z*)-6-phenylhex-5-enal<sup>18</sup> (528 mg, 3.0 mmol) and ((4-methoxyphenyl)carbonylmethylene)triphenylphosphorane<sup>13</sup> (1.48 g, 3.6 mmol), in CH<sub>2</sub>Cl<sub>2</sub> (5 mL) was placed in a round-bottomed flask. The mixture was stirred 4 days and then concentrated *in vacuo*. The crude residue was purified by flash column chromatography (30:1 hexanes/EtOAc) to afford 0.704 g (2.3 mmol, 77% yield) of the title compound as an oil. IR(neat) 3007, 2932, 2839, 1664, 1617, 1597, 1509, 1258 cm<sup>-1</sup>. <sup>1</sup>H NMR: (500.2 MHz, CDCl<sub>3</sub>) δ 7.90 (d, J = 9.1 Hz, 2H), 7.31 (t, J = 7.6 Hz, 2H), 7.28-7.24 (m, 2H), 7.20 (t, J = 7.4 Hz, 1H), 7.01 (dt, J = 15.3, 6.9 Hz, 1H), 6.92 (d, J = 9.1 Hz, 2H), 6.84 (dt, J = 15.3, 1.6 Hz, 1H), 6.46 (d, J = 11.7 Hz, 1H), 5.66 (dt, J = 11.7, 7.4 Hz, 1H), 3.86 (s, 3H), 2.40 (qd, J = 7.5, 1.7 Hz, 2H), 2.33 (qt, J = 7.0, 1.3 Hz, 2H), 1.72-1.64 (m, 2H); <sup>13</sup>C NMR: (125.7 MHz, CDCl<sub>3</sub>) δ 189.0, 163.2, 148.1, 137.5, 132.0, 130.8, 129.5, 128.7, 128.1, 126.6, 125.8, 113.7, 55.4, 32.2, 28.4, 28.0. HRMS (EI) calculated for [C<sub>21</sub>H<sub>22</sub>O<sub>2</sub>]<sup>+</sup>(M<sup>+</sup>) requires *m/z* 306.1615, found *m/z* 306.1619.

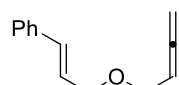

**(*E*)-3-Buta-2,3-dienyloxy-propenyl-benzene:** A flame-dried 50 mL round-bottomed flask was charged with 60% NaH (240 mg, 6.0 mmol) and dry THF (5 mL). Allenol<sup>14</sup> (350 mg, 5.0 mmol) in THF (4 mL) was added dropwise, and the reaction was stirred for an additional 30 min at room temperature. The flask was then cooled to 0 °C, and a solution of (*E*)-cinnamyl bromide (1.2 g, 6.0 mmol) in THF (6 mL) was added dropwise. The mixture was allowed to warm slowly to room temperature. After stirring for 12 h, the reaction was quenched by slow addition of saturated NH<sub>4</sub>Cl. The phases were separated, and the aqueous phase was extracted two times with Et<sub>2</sub>O. The combined organic phases were then washed with brine, dried over MgSO<sub>4</sub>, and concentrated by rotary evaporation. The residue was purified by flash-column chromatography using 40:1 hexanes/ethyl acetate as the eluent to afford 594 mg (3.2 mmol, 64% yield) of a colorless oil. IR(neat) 3026, 2852, 1955, 1599, 1495, 1449, 1360, 1114, 1080 cm<sup>-1</sup>. <sup>1</sup>H NMR: (499.9 MHz, CDCl<sub>3</sub>) δ 7.40-7.36 (m, 2H), 7.33-7.29 (m, 2H), 7.26-7.21 (m, 1H), 6.61 (d, J = 16.0 Hz, 1H), 6.29 (dt, J = 16.0, 6.0 Hz, 1H), 5.28 (dt, J = 13.5, 6.7 Hz, 1H), 4.80 (dt, J = 6.4, 2.5 Hz, 2H), 4.17 (dd, J = 6.2, 1.6 Hz, 2H), 4.07 (dt, J = 6.7, 2.5 Hz, 2H); <sup>13</sup>C NMR: (125.7 MHz, CDCl<sub>3</sub>) δ 209.4, 136.7, 132.7, 128.5, 127.7, 126.5, 125.9, 87.7, 75.7, 70.4, 67.8. HRMS (EI) calculated for [C<sub>13</sub>H<sub>13</sub>O]<sup>+</sup>[M-H]<sup>+</sup> requires *m/z* 185.0961, found *m/z* 185.0962.

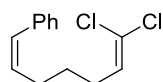

**(*Z*)-7,7-Dichloro-hepta-1,6-dienyl-benzene:** A flame-dried 50 mL round-bottomed flask was charged with triphenylphosphine (1.044 g, 4 mmol), magnesium turnings (48 mg, 2 mmol), and dry THF (10 mL). Carbon tetrachloride (616 mg, 4 mmol) was then added dropwise and the reaction was stirred for an additional 30 min. A solution of (*Z*)-6-phenylhex-5-enal (352 mg, 2.0 mmol) in THF (2 mL) was added to the reaction mixture, and the reaction was stirred for an additional 4 h at room temperature. The reaction was cooled to 0 °C, quenched with water (1 mL), and filtered through a plug of silica gel

with diethyl ether. The filtrate was concentrated by rotary evaporation. The crude mixture was then purified by flash-column chromatography using 100:1 hexanes/EtOAc as the eluent to give 341 mg (1.42 mmol, 71% yield) of an oil. IR(neat) 3010, 2927, 2859, 1621, 1494, 1447  $\text{cm}^{-1}$ .  $^1\text{H}$  NMR: (500.2 MHz,  $\text{CDCl}_3$ )  $\delta$  7.34 (t,  $J = 7.3$  Hz, 2H), 7.28-7.20 (m, 3H), 6.45 (d,  $J = 11.5$  Hz, 1H), 5.83 (t,  $J = 7.3$  Hz, 1H), 5.63 (dt,  $J = 11.5, 7.3$  Hz, 1H), 2.36 (qd,  $J = 7.6, 1.7$  Hz, 2H), 2.19 (q,  $J = 7.6$  Hz, 2H), 1.61-1.53 (m, 2H);  $^{13}\text{C}$  NMR: (125.8 MHz,  $\text{CDCl}_3$ )  $\delta$  137.5, 131.8, 129.6, 129.5, 128.7, 128.2, 126.6, 120.2, 29.2, 28.4, 28.0. HRMS (EI) calculated for  $[\text{C}_{13}\text{H}_{14}\text{Cl}_2]^+(\text{M}^+)$  requires  $m/z$  240.0468, found  $m/z$  240.0457.

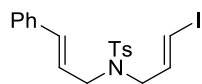

***N*-((*E*)-3-Iodo-allyl)-4-methyl-*N*-((*E*)-3-phenyl-allyl)-benzenesulfonamide:** A flame-dried 50 mL round-bottomed flask was charged 60% NaH (96 mg, 2.4 mmol) and dry THF (3 mL). (*E*)-Cinnamyl *p*-tosylamide<sup>15</sup> (574 mg, 2.0 mmol) in THF (4 mL) was added dropwise, and the reaction was stirred for an additional 30 min at room temperature. The flask was then cooled to 0 °C, and a solution of (*E*)-3-iodoallyl bromide<sup>16</sup> (590 mg, 2.4 mmol) in THF (3 mL) was added dropwise. The mixture was allowed to warm slowly to room temperature. After stirring for 12 h, the reaction was quenched by slow addition of saturated  $\text{NH}_4\text{Cl}$ . The phases were separated, and the aqueous phase was extracted two times with  $\text{Et}_2\text{O}$ . The combined organic phases were then washed with brine, dried over  $\text{MgSO}_4$ , and concentrated by rotary evaporation. The residue was purified by flash-column chromatography using 10:1 hexanes/ethyl acetate as the eluent to afford 674.0 mg (1.5 mmol, 74% yield) of a white solid. Mp: 94-95 °C (hexane/EtOAc). IR(neat) 3056, 3026, 2920, 2854, 1598, 1495, 1447, 1338, 1156  $\text{cm}^{-1}$ .  $^1\text{H}$  NMR: (500.2 MHz,  $\text{CDCl}_3$ )  $\delta$  7.70 (d,  $J = 8.3$  Hz, 2H), 7.33-7.22 (m, 7H), 6.41 (d,  $J = 16.1$  Hz, 1H), 6.35 (dt,  $J = 14.7$  Hz, 1H), 6.27 (dt,  $J = 14.9, 1.0$  Hz, 1H), 5.92 (dt,  $J = 15.5, 6.5$  Hz, 1H), 3.94 (d,  $J = 6.5$  Hz, 2H), 3.78 (d,  $J = 6.5$  Hz, 2H), 2.43 (s, 3H);  $^{13}\text{C}$  NMR: (125.8 MHz,  $\text{CDCl}_3$ )  $\delta$  143.5, 140.1, 136.9, 135.9, 134.3, 129.7, 128.5, 128.0, 127.1, 126.4, 123.3, 80.2, 50.6, 49.4, 21.5. HRMS (ESI) calculated for  $[\text{C}_{19}\text{H}_{24}\text{IN}_2\text{O}_2\text{S}]^+([\text{M}+\text{NH}_4]^+)$  requires  $m/z$  471.0598, found  $m/z$  471.0600.

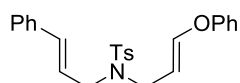

***N*-((*E*)-3-phenoxy-allyl)-*N*-((*E*)-3-phenyl-allyl)-*p*-toluenesulfonamide:** *N*-((*E*)-3-Iodo-allyl)-4-methyl-*N*-((*E*)-3-phenyl-allyl)-benzenesulfonamide (906 mg, 2.0 mmol), PhOH (310 mg, 2.5 mmol), CuCl (198 mg, 2 mmol), *N*-methylmorphine (252 mg, 2.5 mmol),  $\text{Cs}_2\text{CO}_3$  (815 mg, 2.5 mmol), and toluene (2 mL) were placed in a round-bottomed flask equipped with a reflux condenser. The mixture was stirred and refluxed 12 h and then concentrated *in vacuo*. The crude residue was purified by flash column chromatography (10:1 to 5:1 hexanes/EtOAc) to afford 0.381 g (0.9 mmol, 45% yield) of the title compound as an oil. IR(neat) 3028, 2922, 2858, 1672, 1595, 1490, 1339, 1229, 1160  $\text{cm}^{-1}$ .  $^1\text{H}$  NMR: (500.2 MHz,  $\text{CDCl}_3$ )  $\delta$  7.74 (d,  $J = 8.3$  Hz, 2H), 7.31-7.19 (m, 9H), 7.06 (t,  $J = 7.3$  Hz, 1H), 6.91-6.87 (m, 2H), 6.52 (d,  $J = 12.2$  Hz, 1H), 6.48 (d,  $J = 15.9$  Hz, 1H), 6.01 (dt,  $J = 15.9, 6.6$  Hz, 1H), 5.09 (dt,  $J = 12.2, 7.6$  Hz, 1H), 4.01 (d,  $J = 6.6$  Hz, 2H), 3.88 (d,  $J = 7.6$  Hz, 2H), 2.41 (s, 3H);  $^{13}\text{C}$  NMR: (125.8 MHz,  $\text{CDCl}_3$ )  $\delta$  156.5, 146.4, 143.3, 137.4, 136.1, 133.8, 129.7, 129.6, 128.6, 127.9, 127.2, 126.4, 124.1, 123.3, 116.9, 105.6, 48.6, 44.6, 21.5. HRMS (ESI) calculated for  $[\text{C}_{25}\text{H}_{26}\text{NO}_3\text{S}]^+([\text{M}+\text{H}]^+)$  requires  $m/z$  420.1628, found  $m/z$  420.1616.

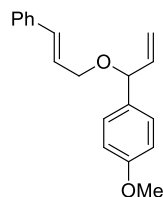

**1-Methoxy-4-[1-((*E*)-3-phenyl-allyloxy)-allyl]-benzene:** A flame-dried 50 mL round-bottomed flask was charged with 1-(4'-methoxyphenyl)allyl alcohol<sup>17</sup> (324 mg, 2.0 mmol), and (*E*)-cinnamyl bromide (0.50 g, 2.4 mmol), and dry DMF (5 mL). The mixture was cooled to 0 °C and treated with 60% NaH (96 mg, 2.4 mmol), then allowed to warm slowly to room temperature. After stirring for 12 h, the reaction was quenched by slow addition of saturated  $\text{NH}_4\text{Cl}$ . The phases were separated, and the aqueous phase was extracted two times with  $\text{Et}_2\text{O}$ . The combined organic phases were then washed with brine, dried over  $\text{MgSO}_4$ , and concentrated by rotary evaporation. The residue was purified by flash-column chromatography using 20:1 hexanes/ethyl acetate as the eluent to afford 0.440 mg (1.6 mmol, 79% yield) of a colorless oil. IR(neat) 3026, 2836, 1610, 1511, 1247  $\text{cm}^{-1}$ .  $^1\text{H}$  NMR: (500.2 MHz,  $\text{CDCl}_3$ )  $\delta$  7.39-7.36 (m, 2H), 7.33-7.27 (m, 4H), 7.25-7.21 (m, 1H), 6.90 (d,  $J = 8.6$  Hz, 2H), 6.58 (d,  $J = 15.9$  Hz, 1H), 6.30 (dt,  $J = 15.9, 6.1$  Hz, 1H), 5.98 (ddd,  $J = 16.9, 10.4, 6.7$  Hz, 1H), 5.27 (d,  $J = 16.9$  Hz, 1H), 5.20 (d,  $J = 10.4$  Hz, 1H), 4.82 (d,  $J = 6.7$  Hz, 1H), 4.17-4.08 (m, 2H), 3.81 (s, 3H);  $^{13}\text{C}$  NMR: (125.7 MHz,  $\text{CDCl}_3$ )  $\delta$  159.2, 139.0, 136.8, 133.0, 132.2, 128.5, 128.2, 127.6, 126.4, 126.3, 116.0, 113.9, 81.6, 68.7, 55.3. HRMS (EI) calculated for  $[\text{C}_{19}\text{H}_{20}\text{O}_2]^+(\text{M}^+)$  requires  $m/z$  280.1458, found  $m/z$  280.1454.

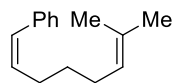

**((*Z*)-7-Methyl-octa-1,6-dienyl)-benzene:** A flame-dried 50 mL round-bottomed flask was charged with isopropyl(triphenyl)phosphonium iodide (1.30 g, 3.0 mmol) and dry THF (10 mL). *n*-Butyllithium (1.2 mL, 2.5 M in hexanes, 3.0 mmol) was then added dropwise at 0 °C, and the reaction was stirred for an additional 30 min. (*Z*)-6-Phenylhex-5-enal<sup>18</sup> (352 mmol, 2.0 mmol) in

THF (2 mL) was added to the reaction mixture and the reaction was stirred for an additional 3 h at room temperature. The reaction was cooled to 0 °C, quenched with water (1 mL), and filtered through a plug of silica gel with diethyl ether. The filtrate was concentrated by rotary evaporation. The crude mixture was then purified by flash-column chromatography using hexanes as the eluent to give 354 mg (1.77 mmol, 89% yield) of a colorless oil. IR(neat) 2966, 2925, 2856, 1600, 1494, 1447, 1376 cm<sup>-1</sup>. <sup>1</sup>H NMR: (499.9 MHz, CDCl<sub>3</sub>) δ 7.32 (t, J = 7.1 Hz, 2H), 7.29-7.26 (m, 2H), 7.23-7.18 (m, 1H), 6.40 (d, J = 11.5 Hz, 1H), 5.66 (dt, J = 11.5, 7.3 Hz, 1H), 5.13-5.08 (m, 1H), 2.33 (qd, J = 7.3, 1.9 Hz, 2H), 2.01 (q, J = 7.3 Hz, 2H), 1.67 (s, 3H), 1.57 (s, 3H), 1.52-1.45 (m, 2H); <sup>13</sup>C NMR: (125.7 MHz, CDCl<sub>3</sub>) δ 137.8, 133.0, 131.7, 128.8, 128.7, 128.1, 126.4, 124.3, 30.1, 28.2, 27.7, 25.7, 17.6. HRMS (EI) calculated for [C<sub>15</sub>H<sub>20</sub>]<sup>+</sup>(M<sup>+</sup>) requires *m/z* 200.1560, found *m/z* 200.1562.

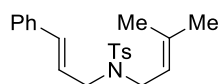

**4-Methyl-*N*-(3-methyl-but-2-enyl)-*N*-((*E*)-3-phenyl-allyl)-benzenesulfonamide:** A flame-dried 50 mL round-bottomed flask was charged with 60% NaH (96 mg, 2.4 mmol) and dry THF (3 mL). (*E*)-Cinnamyl *p*-tosylamide<sup>15</sup> (574 mg, 2.0 mmol) in THF (4 mL) was added dropwise, and the reaction was stirred for an additional 30 min at room temperature. The flask was then cooled to 0 °C, and a solution of 3,3-dimethylallyl bromide (400 g, 90% purity, 2.4 mmol) in 3 mL THF was added dropwise. The mixture was allowed to warm slowly to room temperature. After stirring for 12 h, the reaction was quenched by slow addition of saturated NH<sub>4</sub>Cl. The phases were separated, and the aqueous phase was extracted two times with Et<sub>2</sub>O. The combined organic phases were then washed with brine, dried over MgSO<sub>4</sub>, and concentrated by rotary evaporation. The residue was purified by flash-column chromatography using 10:1 hexanes/ethyl acetate as the eluent to afford 497 mg (1.4 mmol, 70% yield) of a white solid. Mp: 69-70 °C(hexane/EtOAc). IR(neat) 2971, 2919, 1598, 1495, 1449, 1341, 1159 cm<sup>-1</sup>. <sup>1</sup>H NMR: (500.2 MHz, CDCl<sub>3</sub>) δ 7.72 (d, J = 8.5 Hz, 2H), 7.31-7.27 (m, 4H), 7.27-7.21 (m, 3H), 6.40 (d, J = 15.8 Hz, 1H), 5.97 (dt, J = 15.8, 6.8 Hz, 1H), 5.05-5.00 (m, 1H), 3.93 (d, J = 6.8 Hz, 2H), 3.82 (d, J = 7.1 Hz, 2H), 2.43 (s, 3H), 1.66 (s, 3H), 1.57 (s, 3H); <sup>13</sup>C NMR: (125.7 MHz, CDCl<sub>3</sub>) δ 143.1, 137.7, 136.9, 136.4, 133.5, 129.6, 128.5, 127.8, 127.3, 126.4, 124.4, 119.0, 48.8, 44.6, 25.7, 21.4, 17.9. HRMS (ESI) calculated for [C<sub>21</sub>H<sub>26</sub>NO<sub>2</sub>S]<sup>+</sup>([M+H]<sup>+</sup>) requires *m/z* 356.1679, found *m/z* 356.1671.

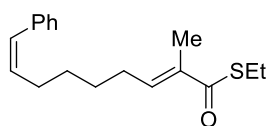

**(*2E,8E*)-2-Methyl-9-phenyl-nona-2,8-dienethioic acid *S*-ethyl ester:** To a stirred solution of *S*-ethyl 2-(diethoxyphosphoryl)propanethioate<sup>19</sup> (0.635 g, 2.5 mmol) in dimethoxyethane (6 mL) under an atmosphere of N<sub>2</sub> was added 60% NaH (80 mg, 2.0 mmol). After 30 min, the reaction was cooled to 0 °C, (*Z*)-6-phenylhept-5-enal<sup>18,20</sup> (0.38 g, 2.0 mmol) was added, and the mixture was stirred at room temperature for an additional 3 h. The reaction was cooled to 0 °C, quenched with water (10 ml), and extracted with ethyl acetate (20 mL × 3). The combined organic layers were dried over MgSO<sub>4</sub> and concentrated *in vacuo*. The crude residue was purified by column chromatography (50:1 hexanes/EtOAc) to afford 0.402 g (1.4 mmol, 70% yield) of the title compound as a colorless oil. IR(neat) 2929, 2857, 1654, 1623, 1447 cm<sup>-1</sup>. <sup>1</sup>H NMR: (500.2 MHz, CDCl<sub>3</sub>) δ 7.33 (t, J = 7.2 Hz, 2H), 7.28-7.24 (m, 2H), 7.24-7.19 (m, 1H), 6.70 (tq, J = 7.3, 1.3 Hz, 1H), 6.43 (d, J = 11.7 Hz, 1H), 5.64 (dt, J = 11.7, 7.3 Hz, 1H), 2.91 (q, J = 7.3 Hz, 2H), 2.38-2.32 (m, 2H), 2.20-2.15 (m, 2H), 1.83 (d, J = 1.3 Hz, 3H), 1.52-1.47 (m, 4H), 1.26 (t, J = 7.4 Hz, 3H); <sup>13</sup>C NMR: (125.8 MHz, CDCl<sub>3</sub>) δ 193.8, 140.5, 137.6, 136.1, 132.5, 129.1, 128.7, 128.1, 126.5, 29.5, 28.4, 28.2, 28.1, 23.2, 14.7, 12.4. HRMS (EI) calculated for [C<sub>18</sub>H<sub>24</sub>OS]<sup>+</sup>(M<sup>+</sup>) requires *m/z* 288.1543, found *m/z* 288.1533.

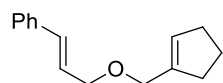

**[(*E*)-3-(Cyclopent-1-enylmethoxy)propenyl]-benzene:** A flame-dried 50 mL round-bottomed flask was charged with cyclopent-1-enyl-methanol<sup>21</sup> (490 mg, 5.0 mmol), (*E*)-cinnamyl bromide (1.18 g, 6.0 mmol), and dry DMF (5 mL). The mixture was cooled to 0 °C and treated with 60% NaH (240 mg, 6.0 mmol), and then allowed to warm slowly to room temperature. After stirring for 12 h, the reaction was quenched by slow addition of saturated NH<sub>4</sub>Cl. The phases were separated, and the aqueous phase was extracted two times with Et<sub>2</sub>O. The combined organic phases were then washed with brine, dried over MgSO<sub>4</sub>, and concentrated by rotary evaporation. The residue was purified by flash-column chromatography using 40:1 hexanes/ethyl acetate as the eluent to afford 744 mg (3.5 mmol, 70% yield) of a colorless oil. IR(neat) 3026, 2926, 2846, 1599, 1495, 1448, 1357, 1074 cm<sup>-1</sup>. <sup>1</sup>H NMR: (500.2 MHz, CDCl<sub>3</sub>) δ 7.40-7.37 (m, 2H), 7.33-7.29 (m, 2H), 7.25-7.21 (m, 1H), 6.61 (d, J = 15.9 Hz, 1H), 6.30 (dt, J = 15.9, 5.9 Hz, 1H), 5.68-5.65 (m, 1H), 4.14 (dd, J = 6.1, 1.4 Hz, 2H), 4.09-4.07 (m, 2H), 2.39-2.32 (m, 4H), 1.95-1.88 (m, 2H); <sup>13</sup>C NMR: (125.7 MHz, CDCl<sub>3</sub>) δ 141.5, 136.8, 132.2, 128.5, 127.7, 127.6, 126.5, 126.3, 70.7, 69.0, 33.0, 32.4, 23.3. HRMS (EI) calculated for [C<sub>15</sub>H<sub>18</sub>O]<sup>+</sup>(M<sup>+</sup>) requires *m/z* 214.1353, found *m/z* 214.1353.

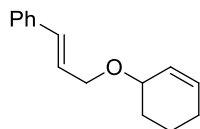

**[(E)-3-(Cyclohex-2-enyloxy)propenyl]benzene:** A flame-dried 50 mL round-bottomed flask was charged with 2-cyclohexen-1-ol (490 mg, 5.0 mmol), (*E*)-cinnamyl bromide (1.18 g, 6.0 mmol), and dry DMF (5 mL). The mixture was cooled to 0 °C and treated with 60% NaH (240 mg, 6.0 mmol), then allowed to warm slowly to room temperature. After stirring for 12 h, the reaction was quenched by slow addition of saturated NH<sub>4</sub>Cl. The phases were separated, and the aqueous phase was extracted two times with Et<sub>2</sub>O. The combined organic phases were then washed with brine, dried over MgSO<sub>4</sub>, and concentrated by rotary evaporation. The residue was purified by flash-column chromatography using 40:1 hexanes/ethyl acetate as the eluent to afford 647 mg (3.0 mmol, 60% yield) of a colorless oil. IR(neat) 3026, 2935, 2862, 1653, 1599, 1496, 1449, 1073 cm<sup>-1</sup>. <sup>1</sup>H NMR: (500.2 MHz, CDCl<sub>3</sub>) δ 7.38 (d, *J* = 7.1 Hz, 2H), 7.30 (t, *J* = 7.1 Hz, 2H), 7.22 (t, *J* = 7.1 Hz, 1H), 6.61 (d, *J* = 16.1 Hz, 1H), 6.32 (dt, *J* = 16.1, 6.1 Hz, 1H), 5.88 (dtd, *J* = 10.0, 3.4, 0.9 Hz, 1H), 5.81 (ddd, *J* = 10.0, 4.9, 1.9 Hz, 1H), 4.24 (ddd, *J* = 12.7, 6.1, 1.5 Hz, 1H), 4.18 (ddd, *J* = 12.7, 6.1, 1.5 Hz, 1H), 3.99-3.94 (m, 1H), 2.11-2.02 (m, 1H), 2.00-1.92 (m, 1H), 1.89-1.68 (m, 3H), 1.61-1.52 (m, 1H); <sup>13</sup>C NMR: (125.7 MHz, CDCl<sub>3</sub>) δ 136.8, 131.8, 131.0, 128.5, 127.7, 127.5, 126.9, 126.4, 72.2, 68.7, 28.4, 25.2, 19.2. HRMS (EI) calculated for [C<sub>15</sub>H<sub>18</sub>O]<sup>+</sup>(M<sup>+</sup>) requires *m/z* 214.1353, found *m/z* 214.1344.

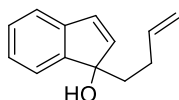

**1-But-3-enyl-1H-inden-1-ol:** Inden-1-one<sup>22</sup> (650 mg, 5.0 mmol) and THF (10 mL) were placed in a round-bottomed flask. A solution of homoallylmagnesium bromide in THF (10 mL, 1M, 10 mmol) was added dropwise at 0 °C. After 30 min, the mixture was quenched with water (5 mL), the phases were separated, and the aqueous phase was extracted an additional two times with Et<sub>2</sub>O. The combined organics were then washed with brine, dried over MgSO<sub>4</sub> and the solvent was removed by rotary evaporation. The crude mixture could then be purified by flash-column chromatography using 10:1 hexanes/ethyl acetate as the eluent to afford 0.417 g (2.2 mmol, 45% yield) of the title compound as a white solid. Mp: 51-52 °C (hexane/Et<sub>2</sub>O). IR(neat) 3363, 3069, 2926, 2855, 1640, 1457, 1067 cm<sup>-1</sup>. <sup>1</sup>H NMR: (500.2 MHz, CDCl<sub>3</sub>) δ 7.37 (d, *J* = 7.0 Hz, 1H), 7.27-7.22 (m, 1H), 7.22-7.17 (m, 2H), 6.63 (d, *J* = 5.8 Hz, 1H), 6.31 (d, *J* = 5.5 Hz, 1H), 5.84-5.74 (m, 1H), 5.02-4.90 (m, 2H), 2.23-2.06 (m, 2H), 1.96-1.83 (m, 3H); <sup>13</sup>C NMR: (125.7 MHz, CDCl<sub>3</sub>) δ 148.4, 141.9, 141.2, 138.4, 131.4, 128.5, 126.3, 121.9, 121.5, 114.4, 84.8, 36.6, 28.8. HRMS (EI) calculated for [C<sub>13</sub>H<sub>14</sub>O]<sup>+</sup>(M<sup>+</sup>) requires *m/z* 186.1040, found *m/z* 186.1042.

### III. [2+2] Photocycloadditions

**General Procedure:** A solution of 1 mol% of Ir(dF(CF<sub>3</sub>)ppy)<sub>2</sub>(dtbbpy)(PF<sub>6</sub>) and 1 equiv of styrene substrate in DMSO (0.01 M) was placed in a test tube (20 x 150 mm). The reaction was stirred in front of a 23 W (1380 lumen) compact fluorescent lamp at a distance of 10 cm. Upon consumption of starting material, the reaction mixture was diluted with Et<sub>2</sub>O (60 mL) and water (10 mL). The aqueous layer was separated and extracted with ether (60 mL x 2). The combined organic layers were washed with water (10 mL x 2), brine (20 mL), dried over Na<sub>2</sub>SO<sub>4</sub>, filtered, and concentrated *in vacuo*. The residue was purified by column chromatography on silica gel.

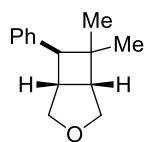

**(1R\*,5R\*,7S\*)-6,6-Dimethyl-7-phenyl-3-oxa-bicyclo[3.2.0]heptane (4),** from (*E*)-3. Experiment 1: Prepared according to the general procedure using 3.3 mg (0.003 mmol) of Ir(dF(CF<sub>3</sub>)ppy)<sub>2</sub>(dtbbpy)(PF<sub>6</sub>), 60.6 mg (0.3 mmol) of [(*E*)-3-(3-methyl-but-2-enyloxy)propenyl]benzene, and 30 mL (0.01 M) of DMSO. After 15 h, the reaction mixture was worked up and purified by flash column chromatography using 40:1 hexanes/EtOAc as the eluent to give 48.6 mg (0.24 mmol, 81% yield, dr: >10:1) of cycloadduct as an oil. Experiment 2: 3.3 mg (0.003 mmol) of Ir(dF(CF<sub>3</sub>)ppy)<sub>2</sub>(dtbbpy)(PF<sub>6</sub>), 60.6 mg (0.3 mmol) of [(*E*)-3-(3-methyl-but-2-enyloxy)propenyl]benzene, and 30 mL (0.01 M) of DMSO. Isolated 50.7 mg (0.25 mmol, 84% yield, dr: >10:1). IR(neat) 2955, 2846, 1497, 1457, 1076 cm<sup>-1</sup>. <sup>1</sup>H NMR: (500.2 MHz, CDCl<sub>3</sub>) δ 7.32-7.28 (m, 2H), 7.20 (d, *J* = 7.3 Hz, 1H), 7.16-7.12 (m, 2H), 4.17 (d, *J* = 10.0 Hz, 1H), 3.79 (d, *J* = 9.1 Hz, 1H), 3.51 (dd, *J* = 10.0, 6.6 Hz, 1H), 3.44 (dd, *J* = 9.1, 4.5 Hz, 1H), 3.27 (td, *J* = 7.8, 4.5 Hz, 1H), 2.99 (d, *J* = 7.2 Hz, 1H), 2.40 (dd, *J* = 7.8, 7.2 Hz, 1H), 1.11 (s, 3H), 0.74 (s, 3H); <sup>13</sup>C NMR: (125.8 MHz, CDCl<sub>3</sub>) δ 140.6, 128.0, 127.6, 125.9, 72.1, 69.1, 51.9, 46.6, 38.0, 37.2, 26.2, 24.2. HRMS (EI) calculated for [C<sub>14</sub>H<sub>18</sub>O]<sup>+</sup>(M<sup>+</sup>) requires *m/z* 202.1353, found *m/z* 202.1364.

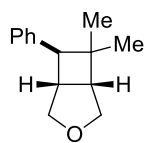

**(1R\*,5R\*,7S\*)-6,6-Dimethyl-7-phenyl-3-oxa-bicyclo[3.2.0]heptane (4),** from (*Z*)-3. Experiment 1: Prepared according to the general procedure using 3.3 mg (0.003 mmol) of Ir(dF(CF<sub>3</sub>)ppy)<sub>2</sub>(dtbbpy)(PF<sub>6</sub>), 60.6 mg (0.3 mmol) of [(*Z*)-3-(3-methyl-but-2-enyloxy)propenyl]benzene, and 30 mL (0.01 M) of DMSO. After 15 h, the reaction mixture was worked up and purified by flash column chromatography using 40:1 hexanes/EtOAc as the eluent to give 52.1 mg (0.26 mmol, 86% yield, dr: >10:1) of cycloadduct as an oil. Experiment 2: 3.3 mg (0.003 mmol) of

$\text{Ir}(\text{dF}(\text{CF}_3)\text{ppy})_2(\text{dtbbpy})(\text{PF}_6)$ , 61.4 mg (0.3 mmol) of [(Z)-3-(3-Methyl-but-2-enyloxy)-propenyl]-benzene, and 30 mL (0.01 M) of DMSO. Isolated 50.6 mg (0.25 mmol, 82% yield, dr: >10:1). All spectroscopic properties were identical to those of the product from the (*E*) alkene.

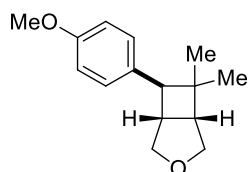

**(1R\*,5R\*,7S\*)-7-(4-Methoxyphenyl)-6,6-dimethyl-3-oxa-bicyclo[3.2.0]heptane (8):**

Experiment 1: Prepared according to the general procedure using 3.3 mg (0.003 mmol) of  $\text{Ir}(\text{dF}(\text{CF}_3)\text{ppy})_2(\text{dtbbpy})(\text{PF}_6)$ , 70.4 mg (0.3 mmol) of 1-methoxy-4-[(*E*)-3-(3-methyl-but-2-enyloxy)-propenyl]-benzene, and 30 mL (0.01 M) of DMSO. After 15 h, the reaction mixture was worked up and purified by flash column chromatography using 40:1 hexanes/EtOAc as the eluent to give 61.5 mg (0.27 mmol, 87% yield, dr: >10:1) of cycloadduct as an oil. Experiment 2: 3.3 mg (0.003 mmol) of

$\text{Ir}(\text{dF}(\text{CF}_3)\text{ppy})_2(\text{dtbbpy})(\text{PF}_6)$ , 69.6 mg (0.3 mmol) of 1-methoxy-4-[(*E*)-3-(3-methyl-but-2-enyloxy)-propenyl]-benzene, and 30 mL (0.01 M) of DMSO. Isolated 62.4 mg (0.27 mmol, 90% yield, dr: >10:1). IR(neat) 2954, 2838, 1611, 1582, 1513, 1458, 1247  $\text{cm}^{-1}$ .  $^1\text{H}$  NMR: (500.2 MHz,  $\text{CDCl}_3$ )  $\delta$  7.06 (d, *J* = 8.8 Hz, 2H), 6.85 (d, *J* = 8.8 Hz, 2H), 4.16 (d, *J* = 10.1 Hz, 1H), 3.80 (s, 3H), 3.78 (d, *J* = 9.1 Hz, 1H), 3.50 (dd, *J* = 10.1, 7.0 Hz, 1H), 3.43 (dd, *J* = 9.1, 4.3 Hz, 1H), 3.24-3.18 (m, 1H), 2.91 (d, *J* = 7.4 Hz, 1H), 2.39 (t, *J* = 7.5 Hz, 1H), 1.08 (s, 3H), 0.73 (s, 3H);  $^{13}\text{C}$  NMR: (125.7 MHz,  $\text{CDCl}_3$ )  $\delta$  157.9, 132.7, 128.6, 113.4, 72.0, 69.1, 55.2, 51.2, 46.5, 38.4, 37.2, 26.2, 24.1. HRMS (EI) calculated for  $[\text{C}_{15}\text{H}_{20}\text{O}_2]^+(\text{M}^+)$  requires *m/z* 232.1458, found *m/z* 232.1462.

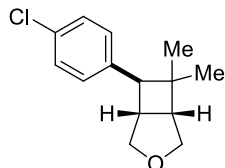

**(1R\*,5R\*,7S\*)-7-(4-Chlorophenyl)-6,6-dimethyl-3-oxa-bicyclo[3.2.0]heptane (9):**

Experiment 1: Prepared according to the general procedure using 3.3 mg (0.003 mmol) of  $\text{Ir}(\text{dF}(\text{CF}_3)\text{ppy})_2(\text{dtbbpy})(\text{PF}_6)$ , 71.8 mg (0.3 mmol) of 1-chloro-4-[(*E*)-3-(3-methyl-but-2-enyloxy)-propenyl]-benzene, and 30 mL (0.01 M) of DMSO. After 10 h, the reaction mixture was worked up and purified by flash column chromatography using 60:1 hexanes/EtOAc as the eluent to give 58.9 mg (0.25 mmol, 87% yield, dr: >10:1) of cycloadduct as an oil. Experiment 2: 3.3 mg (0.003 mmol) of

$\text{Ir}(\text{dF}(\text{CF}_3)\text{ppy})_2(\text{dtbbpy})(\text{PF}_6)$ , 71.8 mg (0.3 mmol) of 1-chloro-4-[(*E*)-3-(3-methyl-but-2-enyloxy)-propenyl]-benzene, and 30 mL (0.01 M) of DMSO. Isolated 58.5 mg (0.25 mmol, 82% yield, dr: >10:1). IR(neat) 2955, 2848, 1493, 1458, 1081  $\text{cm}^{-1}$ .  $^1\text{H}$  NMR: (499.9 MHz,  $\text{CDCl}_3$ )  $\delta$  7.27 (d, *J* = 8.4 Hz, 2H), 7.06 (d, *J* = 8.4 Hz, 2H), 4.16 (d, *J* = 10.1 Hz, 1H), 3.77 (d, *J* = 9.1 Hz, 1H), 3.50 (dd, *J* = 10.1, 6.8 Hz, 1H), 3.43 (dd, *J* = 9.1, 4.5 Hz, 1H), 3.24-3.18 (m, 1H), 2.95 (d, *J* = 7.5 Hz, 1H), 2.40 (t, *J* = 7.5 Hz, 1H), 1.09 (s, 3H), 0.73 (s, 3H);  $^{13}\text{C}$  NMR: (125.7 MHz,  $\text{CDCl}_3$ )  $\delta$  139.1, 131.6, 128.9, 128.1, 71.9, 69.0, 51.3, 46.5, 38.1, 37.2, 26.1, 24.1. HRMS (EI) calculated for  $[\text{C}_{14}\text{H}_{17}\text{ClO}]^+(\text{M}^+)$  requires *m/z* 236.0953, found *m/z* 236.0956.

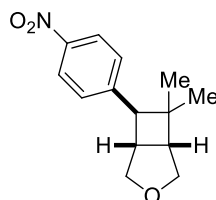

**(1R\*,5R\*,7S\*)-6,6-Dimethyl-7-(4-nitrophenyl)-3-oxa-bicyclo[3.2.0]heptane (10):**

Experiment 1: Prepared according to the general procedure using 3.3 mg (0.003 mmol) of  $\text{Ir}(\text{dF}(\text{CF}_3)\text{ppy})_2(\text{dtbbpy})(\text{PF}_6)$ , 74.1 mg (0.3 mmol) of 1-nitro-4-[(*E*)-3-(3-methyl-but-2-enyloxy)-propenyl]-benzene, and 30 mL (0.01 M) of DMSO. After 12 h, the reaction mixture was worked up and purified by flash column chromatography using 20:1 to 10:1 to 5:1 hexanes/Et<sub>2</sub>O as the gradient to give 52.6 mg (0.21 mmol, 71% yield, dr: >10:1) of cycloadduct as a white solid. Experiment 2: 3.3 mg (0.003 mmol) of

$\text{Ir}(\text{dF}(\text{CF}_3)\text{ppy})_2(\text{dtbbpy})(\text{PF}_6)$ , 74.1 mg (0.3 mmol) of 1-nitro-4-[(*E*)-3-(3-methyl-but-2-enyloxy)-propenyl]-benzene, and 30 mL (0.01 M) of DMSO. Isolated 51.7 mg (0.21 mmol, 70% yield, dr: >10:1). Mp: 87-88 °C (Hexane/ $\text{CHCl}_3$ ). IR(neat) 2945, 2872, 1596, 1510, 1346  $\text{cm}^{-1}$ .  $^1\text{H}$  NMR: (500.2 MHz,  $\text{CDCl}_3$ )  $\delta$  8.17 (d, *J* = 8.9 Hz, 2H), 7.29 (d, *J* = 8.9 Hz, 2H), 4.19 (d, *J* = 10.2 Hz, 1H), 3.81 (d, *J* = 9.1 Hz, 1H), 3.53 (d, *J* = 10.2, 6.7 Hz, 1H), 3.47 (d, *J* = 9.1, 4.5 Hz, 1H), 3.31 (td, *J* = 7.7, 4.5 Hz, 1H), 3.10 (d, *J* = 7.3 Hz, 1H), 2.48-2.43 (m, 1H), 1.16 (s, 3H), 0.75 (s, 3H);  $^{13}\text{C}$  NMR: (125.8 MHz,  $\text{CDCl}_3$ )  $\delta$  148.6, 146.3, 128.2, 123.3, 71.8, 69.0, 51.8, 46.6, 37.98, 37.96, 38.0, 26.2, 24.2. HRMS (EI) calculated for  $[\text{C}_{14}\text{H}_{17}\text{NO}_3]^+(\text{M}^+)$  requires *m/z* 247.1203, found *m/z* 247.1196.

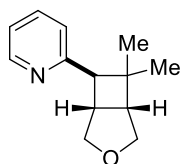

**2-((1R\*,5R\*,6R\*)-7,7-Dimethyl-3-oxa-bicyclo[3.2.0]hept-6-yl)-pyridine (11):**

Experiment 1: Prepared according to the general procedure using 3.3 mg (0.003 mmol) of  $\text{Ir}(\text{dF}(\text{CF}_3)\text{ppy})_2(\text{dtbbpy})(\text{PF}_6)$ , 60.9 mg (0.3 mmol) of 2-[(*E*)-3-(3-methyl-but-2-enyloxy)-propenyl]-pyridine, and 30 mL (0.01 M) of DMSO. After 12 h, the reaction mixture was worked up and purified by flash column chromatography using 2:1 hexanes/EtOAc as the eluent to give 42.7 mg (0.21 mmol, 70% yield, dr: 10:1) of cycloadduct as an oil. Experiment 2: 3.3 mg (0.003 mmol) of

$\text{Ir}(\text{dF}(\text{CF}_3)\text{ppy})_2(\text{dtbbpy})(\text{PF}_6)$ , 61.3 mg (0.3 mmol) of 2-[(*E*)-3-(3-methyl-but-2-enyloxy)-propenyl]-pyridine, and 30 mL (0.01 M) of DMSO. Isolated 43.6 mg (0.21 mmol, 71% yield, dr: 10:1).



IR(neat) 2952, 2845, 1590, 1567, 1473, 1433, 1080  $\text{cm}^{-1}$ .  $^1\text{H}$  NMR: (499.9 MHz,  $\text{CDCl}_3$ )  $\delta$  8.58 (ddd,  $J = 4.9, 1.8, 0.9$  Hz, 1H), 7.57 (td,  $J = 7.6, 1.8$  Hz, 1H), 7.10 (ddd,  $J = 7.4, 4.9, 0.9$  Hz, 1H), 7.03 (d,  $J = 7.6$  Hz, 1H), 4.17 (d,  $J = 10.1$  Hz, 1H), 3.81 (d,  $J = 9.2$  Hz, 1H), 3.67 (ddd,  $J = 7.9, 7.3, 4.6$  Hz, 1H), 3.51 (dd,  $J = 10.1, 6.4$  Hz, 1H), 3.46 (dd,  $J = 9.2, 4.6$  Hz, 1H), 3.06 (d,  $J = 6.8$  Hz, 1H), 2.43 (dd,  $J = 7.6, 7.0$  Hz, 1H), 1.16 (s, 3H), 0.74 (s, 3H);  $^{13}\text{C}$  NMR: (125.8 MHz,  $\text{CDCl}_3$ )  $\delta$  160.3, 148.9, 135.5, 122.9, 120.9, 72.2, 69.1, 53.5, 46.5, 37.5, 36.5, 25.8, 24.1. HRMS (EI) calculated for  $[\text{C}_{13}\text{H}_{17}\text{NO}]^+(\text{M}^+)$  requires  $m/z$  203.1305, found  $m/z$  203.1315.

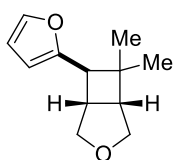

**(1S\*,5R\*,7R\*)-7-Furan-2-yl-6,6-dimethyl-3-oxa-bicyclo[3.2.0]heptane (12):** Experiment 1: Prepared according to the general procedure using 3.3 mg (0.003 mmol) of  $\text{Ir}(\text{dF}(\text{CF}_3)\text{ppy})_2(\text{dtbbpy})(\text{PF}_6)$ , 59.1 mg (0.3 mmol) of 2-[(*E*)-3-(3-methyl-but-2-enyloxy)-propenyl]-furan, and 30 mL (0.01 M) of DMSO. After 10 h, the reaction mixture was worked up and purified by flash column chromatography using 60:1 hexanes/EtOAc as the eluent to give 38.7 mg (0.20 mmol, 65% yield, dr: 8:1) of cycloadduct as an oil. Experiment 2: 3.3 mg (0.003 mmol) of  $\text{Ir}(\text{dF}(\text{CF}_3)\text{ppy})_2(\text{dtbbpy})(\text{PF}_6)$ , 58.0 mg (0.3 mmol) of 2-[(*E*)-3-(3-methyl-but-2-enyloxy)-propenyl]-furan, and 30 mL (0.01 M) of DMSO. Isolated 36.5 mg (0.19 mmol, 63% yield, dr: 8:1). IR(neat) 2956, 2848, 1592, 1506, 1458, 1076  $\text{cm}^{-1}$ .  $^1\text{H}$  NMR: (499.9 MHz,  $\text{CDCl}_3$ )  $\delta$  7.33 (dd,  $J = 1.8, 0.6$  Hz, 1H), 6.31 (dd,  $J = 3.2, 1.8$  Hz, 1H), 6.03 (dt,  $J = 3.2, 0.9$  Hz, 1H), 4.11 (d,  $J = 10.0$  Hz, 1H), 3.79 (d,  $J = 9.1$  Hz, 1H), 3.45 (dd,  $J = 10.0, 6.7$  Hz, 1H), 3.40 (dd,  $J = 9.1, 4.4$  Hz, 1H), 3.18-3.13 (m, 1H), 2.86 (d,  $J = 7.0$  Hz, 1H), 2.40 (dd,  $J = 7.6, 7.0$  Hz, 1H), 1.06 (s, 3H), 0.88 (s, 3H);  $^{13}\text{C}$  NMR: (125.7 MHz,  $\text{CDCl}_3$ )  $\delta$  156.1, 141.2, 109.9, 105.6, 71.9, 69.1, 46.5, 45.8, 38.4, 37.6, 25.9, 23.6. HRMS (EI) calculated for  $[\text{C}_{12}\text{H}_{16}\text{O}_2]^+(\text{M}^+)$  requires  $m/z$  192.1145, found  $m/z$  192.1140.

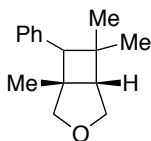

**1,6,6-Trimethyl-7-phenyl-3-oxa-bicyclo[3.2.0]heptane (13)** Experiment 1: Prepared according to the general procedure using 3.3 mg (0.003 mmol) of  $\text{Ir}(\text{dF}(\text{CF}_3)\text{ppy})_2(\text{dtbbpy})(\text{PF}_6)$ , 65.3 mg (0.3 mmol) of [(*E*)-2-methyl-3-(3-methyl-but-2-enyloxy)-propenyl]-benzene, and 30 mL (0.01 M) of DMSO. After 72 h, the reaction mixture was worked up and purified by flash column chromatography using 40:1 hexanes/EtOAc as the eluent to give 51.2 mg (0.24 mmol, 78% yield, dr: 1:1) of cycloadduct as an oil. Experiment 2: 3.3 mg (0.003 mmol) of  $\text{Ir}(\text{dF}(\text{CF}_3)\text{ppy})_2(\text{dtbbpy})(\text{PF}_6)$ , 65.7 mg (0.3 mmol) of [(*E*)-2-methyl-3-(3-methyl-but-2-enyloxy)-propenyl]-benzene, and 30 mL (0.01 M) of DMSO. Isolated 48.5 mg (0.22 mmol, 74% yield, dr: 1:1). **(1R\*,5S\*,7S\*) Diastereomer:** IR(neat) 2954, 2926, 2866, 2841, 1603, 1496, 1456, 1064  $\text{cm}^{-1}$ .  $^1\text{H}$  NMR: (499.9 MHz,  $\text{CDCl}_3$ )  $\delta$  7.30-7.24 (m, 4H), 7.23-7.18 (m, 1H), 4.14 (d,  $J = 10.1$  Hz, 1H), 3.74 (d,  $J = 8.8$  Hz, 1H), 3.61 (dd,  $J = 10.1, 6.7$  Hz, 1H), 3.15 (s, 1H), 3.06 (d,  $J = 8.8$  Hz, 1H), 2.01 (d,  $J = 6.7$  Hz, 1H), 1.39 (s, 3H), 1.20 (s, 3H), 1.08 (s, 3H);  $^{13}\text{C}$  NMR: (125.7 MHz,  $\text{CDCl}_3$ )  $\delta$  139.6, 129.4, 127.8, 125.9, 79.2, 69.6, 54.5, 53.5, 47.2, 36.9, 27.1, 24.9, 19.0. HRMS (EI) calculated for  $[\text{C}_{15}\text{H}_{20}\text{O}]^+(\text{M}^+)$  requires  $m/z$  216.1509, found  $m/z$  216.1499. **(1R\*,5S\*,7R\*) Diastereomer:** IR(neat) 2949, 2862, 1602, 1495, 1451, 1068  $\text{cm}^{-1}$ .  $^1\text{H}$  NMR: (499.9 MHz,  $\text{CDCl}_3$ )  $\delta$  7.30-7.25 (m, 4H), 7.23-7.18 (m, 1H), 4.11 (d,  $J = 9.8$  Hz, 1H), 4.10 (d,  $J = 9.8$  Hz, 1H), 3.65 (dd,  $J = 9.8, 5.6$  Hz, 1H), 3.14 (d,  $J = 9.8$  Hz, 1H), 3.10 (s, 1H), 2.18 (d,  $J = 5.6$  Hz, 1H), 1.40 (s, 3H), 1.31 (s, 3H), 0.94 (s, 3H);  $^{13}\text{C}$  NMR: (125.7 MHz,  $\text{CDCl}_3$ )  $\delta$  139.2, 130.0, 127.9, 126.1, 74.3, 69.9, 59.2, 54.0, 45.6, 35.6, 34.9, 26.2, 18.9. HRMS (EI) calculated for  $[\text{C}_{15}\text{H}_{20}\text{O}]^+(\text{M}^+)$  requires  $m/z$  216.1509, found  $m/z$  216.1506.

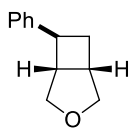

**(1S\*,5R\*,6S\*)-6-Phenyl-3-oxa-bicyclo[3.2.0]heptane (14):** Experiment 1: Prepared according to the general procedure using 3.3 mg (0.003 mmol) of  $\text{Ir}(\text{dF}(\text{CF}_3)\text{ppy})_2(\text{dtbbpy})(\text{PF}_6)$ , 52.4 mg (0.3 mmol) of [(*E*)-3-(prop-2-enyloxy)-propenyl]-benzene<sup>23</sup>, and 30 mL (0.01 M) of DMSO. After 28 h, the reaction mixture was worked up and purified by flash column chromatography using 50:1 hexanes/EtOAc as the eluent to give 43.3 mg (0.25 mmol, 83% yield, dr: 7:1) of cycloadduct as an oil. Experiment 2: 3.3 mg (0.003 mmol) of  $\text{Ir}(\text{dF}(\text{CF}_3)\text{ppy})_2(\text{dtbbpy})(\text{PF}_6)$ , 52.0 mg (0.3 mmol) of [(*E*)-3-(prop-2-enyloxy)-propenyl]-benzene, and 30 mL (0.01 M) of DMSO. Isolated 40.1 mg (0.23 mmol, 77% yield, dr: 7:1). All analytical data data were consistent with previously reported values.<sup>23</sup>

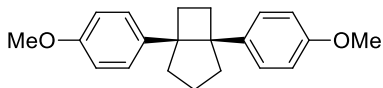

**(1R\*,5S\*)-1,5-Bis-(4-methoxy-phenyl)-bicyclo[3.2.0]heptane (16):** Experiment 1: Prepared according to the general procedure using 3.3 mg (0.003 mmol) of  $\text{Ir}(\text{dF}(\text{CF}_3)\text{ppy})_2(\text{dtbbpy})(\text{PF}_6)$ , 92.4 mg (0.3 mmol) of 2,6-di(4-methoxyphenyl)-1,6-heptadiene, and 30 mL (0.01 M) of DMSO. After 20 h, the reaction mixture was worked up and purified by flash column chromatography using 30:1 hexanes/EtOAc as the eluent to give 82.5 mg (0.27 mmol, 89% yield, dr: >10:1) of cycloadduct as an oil. Experiment 2: 3.3 mg (0.003 mmol) of  $\text{Ir}(\text{dF}(\text{CF}_3)\text{ppy})_2(\text{dtbbpy})(\text{PF}_6)$ , 92.4 mg (0.3 mmol) of 2,6-di(4-methoxyphenyl)-1,6-heptadiene, and 30 mL

(0.01 M) of DMSO. Isolated 84.5 mg (0.27 mmol, 91% yield, dr: >10:1). All analytical data were consistent with previously reported values.<sup>9</sup>

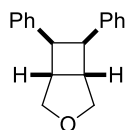

**6,7-Diphenyl-3-oxabicyclo[3.2.0]heptane (17):** Experiment 1: Prepared according to the general procedure using 3.3 mg (0.003 mmol) of Ir(dF(CF<sub>3</sub>)ppy)<sub>2</sub>(dtbbpy)(PF<sub>6</sub>), 75.0 mg (0.3 mmol) of (*E,E'*)-dicinnamyl ether, and 30 mL (0.01 M) of DMSO. After 4 h, the reaction mixture was worked up and purified by flash column chromatography using 40:1 hexanes/EtOAc as the eluent to give 63.8 mg (0.26 mmol, 85% yield, dr: 3:1) of cycloadduct. Experiment 2: 3.3 mg (0.003 mmol) of Ir(dF(CF<sub>3</sub>)ppy)<sub>2</sub>(dtbbpy)(PF<sub>6</sub>), 75.0 mg (0.3 mmol) of (*E,E'*)-dicinnamyl ether, and 30 mL (0.01 M) of DMSO. Isolated 65.4 mg (0.27 mmol, 87% yield, dr: 3:1). (**1*R*\*,5*S*\*,6*R*\*,7*S*\***) Diastereomer (major): solid. Mp: 73-75 °C (hexane/EtOAc). IR(neat) 3027, 2958, 2846, 1602, 1496, 1453, 1072 cm<sup>-1</sup>. <sup>1</sup>H NMR: (500.2 MHz, CDCl<sub>3</sub>) δ 7.09-7.05 (m, 4H), 7.01-6.97 (m, 2H), 6.95-6.92 (m, 4H), 4.10 (d, J = 9.4 Hz, 2H), 3.75 (d, J = 4.1 Hz, 2H), 3.73-3.69 (m, 2H), 3.33-3.28 (m, 2H); <sup>13</sup>C NMR: (125.8 MHz, CDCl<sub>3</sub>) δ 140.8, 128.1, 127.7, 125.6, 74.0, 47.2, 42.1. HRMS (EI) calculated for [C<sub>18</sub>H<sub>18</sub>O]<sup>+</sup>(M<sup>+</sup>) requires *m/z* 250.1353, found *m/z* 250.1354. (**1*R*\*,5*S*\*,6*S*\*,7*S*\***) Diastereomer (minor): Oil. IR(neat) 3026, 2961, 2849, 1602, 1495, 1447, 1082 cm<sup>-1</sup>. <sup>1</sup>H NMR: (500.2 MHz, CDCl<sub>3</sub>) δ 7.35-7.28 (m, 4H), 7.28-7.24 (m, 4H), 7.23-7.17 (m, 2H), 4.04 (d, J = 9.2 Hz, 1H), 3.85-3.78 (m, 2H), 3.67 (dd, J = 9.6, 6.6 Hz, 1H), 3.54 (dd, J = 9.2, 4.1 Hz, 1H), 3.48 (dd, J = 10.1, 7.0 Hz, 1H), 3.28-3.22 (m, 1H), 3.12 (td, J = 7.0, 4.4 Hz, 1H); <sup>13</sup>C NMR: (125.8 MHz, CDCl<sub>3</sub>) δ 144.4, 140.3, 128.5, 128.4, 127.7, 126.4, 126.3, 126.2, 72.9, 68.4, 45.9, 45.5, 44.1, 40.7. HRMS (EI) calculated for [C<sub>18</sub>H<sub>18</sub>O]<sup>+</sup>(M<sup>+</sup>) requires *m/z* 250.1353, found *m/z* 250.1349.

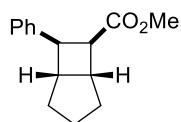

**(1*S*\*,5*R*\*,6*S*\*,7*R*\*)-7-Phenyl-bicyclo[3.2.0]heptane-6-carboxylic acid methyl ester (18):** Experiment 1: Prepared according to the general procedure using 3.3 mg (0.003 mmol) of Ir(dF(CF<sub>3</sub>)ppy)<sub>2</sub>(dtbbpy)(PF<sub>6</sub>), 70.1 mg (0.3 mmol) of (*2E,7Z*)-8-phenyl-octa-2,7-dienoic acid methyl ester, and 30 mL (0.01 M) of DMSO. After 11 h, the reaction mixture was worked up and purified by flash column chromatography using 100:1 hexanes/EtOAc as the eluent to give 60.2 mg (0.26 mmol, 86% yield, dr: 4:1) of cycloadduct as an oil. Experiment 2: 3.3 mg (0.003 mmol) of Ir(dF(CF<sub>3</sub>)ppy)<sub>2</sub>(dtbbpy)(PF<sub>6</sub>), 69.0 mg (0.3 mmol) of (*2E,7Z*)-8-phenyl-octa-2,7-dienoic acid methyl ester, and 30 mL (0.01 M) of DMSO. Isolated 61.4 mg (0.27 mmol, 89% yield, dr: 4:1). IR(neat) 2948, 2855, 1733, 1494, 1434, 1172 cm<sup>-1</sup>. <sup>1</sup>H NMR: (499.9 MHz, CDCl<sub>3</sub>) δ 7.29-7.25 (m, 2H), 7.24-7.20 (m, 2H), 7.19-7.15 (m, 1H), 3.30 (dd, J = 10.6, 5.5 Hz, 1H), 3.27-3.21 (m, 1H), 3.15 (s, 3H), 3.06-3.01 (m, 2H), 1.95-1.88 (m, 2H), 1.72-1.57 (m, 4H); <sup>13</sup>C NMR: (125.7 MHz, CDCl<sub>3</sub>) δ 173.3, 141.6, 128.0, 127.7, 126.3, 50.9, 47.3, 45.9, 42.1, 36.8, 32.8, 32.1, 25.4. HRMS (EI) calculated for [C<sub>15</sub>H<sub>18</sub>O<sub>2</sub>]<sup>+</sup>(M<sup>+</sup>) requires *m/z* 230.1302, found *m/z* 230.1295.

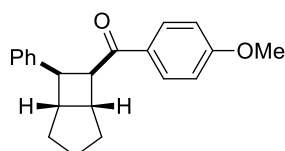

**(4-Methoxy-phenyl)-((1*S*\*,5*R*\*,6*S*\*,7*R*\*)-7-phenyl-bicyclo[3.2.0]hept-6-yl)-methanone (19):** Experiment 1: Prepared according to the general procedure using 3.3 mg (0.003 mmol) of Ir(dF(CF<sub>3</sub>)ppy)<sub>2</sub>(dtbbpy)(PF<sub>6</sub>), 92.0 mg (0.3 mmol) of (*2E,7Z*)-1-(4-methoxy-phenyl)-8-phenyl-octa-2,7-dien-1-one, and 30 mL (0.01 M) of DMSO. After 11 h, the reaction mixture was worked up and purified by flash column chromatography using 40:1 hexanes/EtOAc as the eluent to give 66.1 mg (0.22 mmol, 72% yield, dr: 6:1) of cycloadduct as a white solid. Experiment 2: 3.3 mg (0.003 mmol) of Ir(dF(CF<sub>3</sub>)ppy)<sub>2</sub>(dtbbpy)(PF<sub>6</sub>), 91.8 mg (0.3 mmol) of (*2E,7Z*)-1-(4-methoxy-phenyl)-8-phenyl-octa-2,7-dien-1-one, and 30 mL (0.01 M) of DMSO. Isolated 70.2 mg (0.23 mmol, 76% yield, dr: 6:1). Mp: 110-111 °C (hexane/CHCl<sub>3</sub>). IR(neat) 2946, 2853, 1666, 1601, 1510, 1245, 1169 cm<sup>-1</sup>. <sup>1</sup>H NMR: (500.2 MHz, CDCl<sub>3</sub>) δ 7.52 (d, J = 8.9 Hz, 2H), 7.06-7.00 (m, 4H), 6.95-6.91 (m, 1H), 6.69 (d, J = 8.9 Hz, 2H), 3.83 (ddd, J = 10.8, 5.7, 1.0 Hz, 1H), 3.75 (s, 3H), 3.69-3.63 (m, 1H), 3.42 (dd, J = 10.9, 4.8 Hz, 1H), 2.87 (td, J = 7.6, 4.8 Hz, 1H), 2.09-1.93 (m, 2H), 1.77 (dd, J = 12.9, 6.5 Hz, 1H), 1.74-1.61 (m, 3H); <sup>13</sup>C NMR: (125.7 MHz, CDCl<sub>3</sub>) δ 197.8, 162.6, 141.5, 130.11, 130.05, 128.1, 127.7, 126.0, 113.0, 55.2, 49.8, 48.9, 43.5, 35.6, 32.9, 32.6, 25.5. HRMS (EI) calculated for [C<sub>21</sub>H<sub>22</sub>O]<sup>+</sup>(M<sup>+</sup>) requires *m/z* 306.1615, found *m/z* 306.1609.

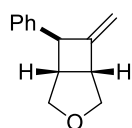

**(1*R*\*,5*R*\*,7*S*\*)-6-Methylene-7-phenyl-3-oxa-bicyclo[3.2.0]heptane (20):** Experiment 1: Prepared according to the general procedure using 3.3 mg (0.003 mmol) of Ir(dF(CF<sub>3</sub>)ppy)<sub>2</sub>(dtbbpy)(PF<sub>6</sub>), 56.0 mg (0.3 mmol) of (*E*)-3-buta-2,3-dienyloxy-propenyl-benzene, and 30 mL (0.01 M) of DMSO. After 20 h, the reaction mixture was worked up and purified by flash column chromatography using 50:1 hexanes/EtOAc as the eluent to give 44.5 mg (0.24 mmol, 80% yield, dr: 7:1) of cycloadduct as an oil. Experiment 2: 3.3 mg (0.003 mmol) of Ir(dF(CF<sub>3</sub>)ppy)<sub>2</sub>(dtbbpy)(PF<sub>6</sub>), 55.8 mg (0.3 mmol) of (*E*)-3-buta-2,3-dienyloxy-propenyl-benzene, and 30 mL (0.01 M) of DMSO. Isolated 41.7 mg (0.22 mmol, 75% yield, dr: 7:1).

IR(neat) 2962, 2846, 1672, 1602, 1494, 1451, 1072  $\text{cm}^{-1}$ .  $^1\text{H NMR}$ : (500.2 MHz,  $\text{CDCl}_3$ )  $\delta$  7.34-7.30 (m, 2H), 7.29-7.25 (m, 2H), 7.24-7.20 (m, 1H), 5.00 (t,  $J = 2.4$  Hz, 1H), 4.83 (t,  $J = 2.4$  Hz, 1H), 4.10 (t,  $J = 9.2$  Hz, 2H), 3.81-3.77 (m, 1H), 3.63 (dd,  $J = 8.6, 5.9$  Hz, 1H), 3.59-3.52 (m, 2H), 2.97 (dt,  $J = 7.6, 5.1$  Hz, 1H);  $^{13}\text{C NMR}$ : (125.7 MHz,  $\text{CDCl}_3$ )  $\delta$  153.1, 142.8, 128.5, 127.2, 126.4, 108.6, 74.0, 73.6, 52.8, 46.7, 45.3. HRMS (EI) calculated for  $[\text{C}_{13}\text{H}_{14}\text{O}]^+(\text{M}^+)$  requires  $m/z$  186.1040, found  $m/z$  186.1043.

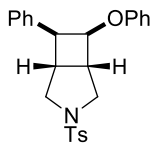

**6-Phenoxy-7-phenyl-3-(toluene-4-sulfonyl)-3-aza-bicyclo[3.2.0]heptane (21)**: Experiment 1: Prepared according to the general procedure using 3.3 mg (0.003 mmol) of  $\text{Ir}(\text{dF}(\text{CF}_3)\text{ppy})_2(\text{dtbbpy})(\text{PF}_6)$ , 125.7 mg (0.3 mmol) of 4-methyl-*N*-((*E*)-3-phenoxy-allyl)-*N*-((*E*)-3-phenyl-allyl)-benzenesulfonamide, and 30 mL (0.01 M) of DMSO. After 4 h, the reaction mixture was worked up and purified by flash column chromatography using 9:1 hexanes/EtOAc as the eluent to give 102.2 mg (0.24 mmol, 81% yield, dr: 2:1) of cycloadduct as a white solid.

Experiment 2: 3.3 mg (0.003 mmol) of  $\text{Ir}(\text{dF}(\text{CF}_3)\text{ppy})_2(\text{dtbbpy})(\text{PF}_6)$ , 125.7 mg (0.3 mmol) of 4-methyl-*N*-((*E*)-3-phenoxy-allyl)-*N*-((*E*)-3-phenyl-allyl)-benzenesulfonamide, and 30 mL (0.01 M) of DMSO. Isolated 91.7 mg (0.22 mmol, 73% yield, dr: 2:1). **(1*R*\*,5*S*\*,6*R*\*,7*S*\*) Diastereomer** (major): Mp: 162-165 °C (hexane/EtOAc). IR(neat) 3061, 3029, 2976, 2918, 2855, 1599, 1495, 1346, 1240, 1170  $\text{cm}^{-1}$ .  $^1\text{H NMR}$ : (500.2 MHz,  $\text{CDCl}_3$ )  $\delta$  7.74 (d,  $J = 8.2$  Hz, 2H), 7.36 (d,  $J = 8.3$  Hz, 2H), 7.26-7.17 (m, 4H), 7.14-7.06 (m, 3H), 6.80 (t,  $J = 7.2$  Hz, 1H), 6.56 (d,  $J = 8.3$  Hz, 2H), 4.82 (dd,  $J = 7.5, 2.4$  Hz, 1H), 3.78 (d,  $J = 10.1$  Hz, 1H), 3.70 (dd,  $J = 7.5, 3.7$  Hz, 1H), 3.63 (d,  $J = 10.1$  Hz, 1H), 3.07-3.01 (m, 2H), 2.76-2.66 (m, 2H), 2.45 (s, 3H);  $^{13}\text{C NMR}$ : (125.8 MHz,  $\text{CDCl}_3$ )  $\delta$  156.7, 143.9, 137.9, 131.4, 129.7, 129.05, 129.04, 128.1, 127.8, 126.5, 120.7, 115.1, 75.6, 53.6, 52.4, 49.0, 43.9, 41.3, 21.5. HRMS (ESI) calculated for  $[\text{C}_{25}\text{H}_{25}\text{NO}_3\text{SNa}]^+([\text{M}+\text{Na}]^+)$  requires  $m/z$  442.1453, found  $m/z$  442.1454. **(1*R*\*,5*S*\*,6*S*\*,7*S*\*)-Diastereomer** (minor): Mp: 139-140 °C (hexane/EtOAc). IR(neat) 3028, 2973, 2922, 2857, 1597, 1495, 13444, 1233, 1169  $\text{cm}^{-1}$ .  $^1\text{H NMR}$ : (500.2 MHz,  $\text{CDCl}_3$ )  $\delta$  7.74 (d,  $J = 8.3$  Hz, 2H), 7.35-7.30 (m, 4H), 7.26-7.18 (m, 5H), 6.92 (t,  $J = 7.2$  Hz, 1H), 6.75-6.71 (m, 2H), 4.64 (t,  $J = 7.3$  Hz, 1H), 3.82 (dd,  $J = 10.5, 2.1$  Hz, 1H), 3.62 (d,  $J = 9.8$  Hz, 1H), 3.51 (t,  $J = 7.3$  Hz, 1H), 3.29-3.22 (m, 1H), 2.90 (dd,  $J = 9.8, 5.2$  Hz, 1H), 2.87 (dd,  $J = 10.5, 8.8$  Hz, 1H), 2.72 (td,  $J = 7.3, 5.2$  Hz, 1H), 2.43 (s, 3H);  $^{13}\text{C NMR}$ : (125.8 MHz,  $\text{CDCl}_3$ )  $\delta$  156.9, 143.6, 141.4, 132.7, 129.6, 129.5, 128.6, 127.9, 126.9, 126.7, 121.1, 115.1, 73.7, 53.4, 50.1, 46.3, 40.9, 39.2, 21.5. HRMS (ESI) calculated for  $[\text{C}_{25}\text{H}_{25}\text{NO}_3\text{SNa}]^+([\text{M}+\text{Na}]^+)$  requires  $m/z$  442.1453, found  $m/z$  442.1447.

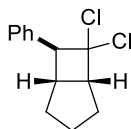

**(1*S*\*,5*R*\*,7*S*\*)-6,6-Dichloro-7-phenyl-bicyclo[3.2.0]heptane (22)**: Experiment 1: Prepared according to the general procedure using 3.3 mg (0.003 mmol) of  $\text{Ir}(\text{dF}(\text{CF}_3)\text{ppy})_2(\text{dtbbpy})(\text{PF}_6)$ , 72.0 mg (0.3 mmol) of ((*Z*)-7,7-dichloro-hepta-1,6-dienyl)-benzene, and 30 mL (0.01 M) of DMSO. After 20 h, the reaction mixture was worked up and purified by flash column chromatography using hexanes as the eluent to give 64.6 mg (0.27 mmol, 90% yield, dr: >10:1) of cycloadduct as an oil.

Experiment 2: 3.3 mg (0.003 mmol) of  $\text{Ir}(\text{dF}(\text{CF}_3)\text{ppy})_2(\text{dtbbpy})(\text{PF}_6)$ , 72.0 mg (0.3 mmol) of ((*Z*)-7,7-dichloro-hepta-1,6-dienyl)-benzene, and 30 mL (0.01 M) of DMSO. Isolated 63.1 mg (0.26 mmol, 88% yield, dr: >10:1). IR(neat) 3030, 2957, 2856, 1606, 1497, 1448  $\text{cm}^{-1}$ .  $^1\text{H NMR}$ : (500.2 MHz,  $\text{CDCl}_3$ )  $\delta$  7.40-7.36 (m, 2H), 7.34-7.28 (m, 3H), 3.75 (d,  $J = 7.5$  Hz, 1H), 3.36-3.26 (m, 2H), 2.32-2.25 (m, 1H), 1.99-1.91 (m, 2H), 1.85-1.76 (m, 1H), 1.76-1.70 (m, 1H), 1.70-1.60 (m, 1H);  $^{13}\text{C NMR}$ : (125.8 MHz,  $\text{CDCl}_3$ )  $\delta$  137.3, 128.2, 128.0, 127.4, 90.2, 61.1, 57.6, 39.2, 31.0, 29.4, 25.6. HRMS (EI) calculated for  $[\text{C}_{13}\text{H}_{14}\text{Cl}_2]^+(\text{M}^+)$  requires  $m/z$  240.0468, found  $m/z$  240.0459.

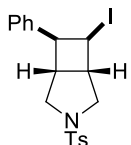

**6-Iodo-7-phenyl-3-(toluene-4-sulfonyl)-3-aza-bicyclo[3.2.0]heptane (23)**: Experiment 1: Prepared according to the general procedure using 3.3 mg (0.003 mmol) of  $\text{Ir}(\text{dF}(\text{CF}_3)\text{ppy})_2(\text{dtbbpy})(\text{PF}_6)$ , 136.7 mg (0.3 mmol) of *N*-((*E*)-3-iodo-allyl)-4-methyl-*N*-((*E*)-3-phenyl-allyl)-benzenesulfonamide, and 30 mL (0.01 M) of DMSO. After 15 h, the reaction mixture was worked up and purified by flash column chromatography using 15:1 to 10:1 to 5:1 hexanes/EtOAc as the gradient to give 123.0 mg (0.27 mmol, 90% yield, dr: 2:1) of cycloadduct as a white solid. Experiment 2: 3.3 mg (0.003 mmol)

of  $\text{Ir}(\text{dF}(\text{CF}_3)\text{ppy})_2(\text{dtbbpy})(\text{PF}_6)$ , 135.1 mg (0.3 mmol) of *N*-((*E*)-3-iodo-allyl)-4-methyl-*N*-((*E*)-3-phenyl-allyl)-benzenesulfonamide, and 30 mL (0.01 M) of DMSO. Isolated 121.5 mg (0.27 mmol, 90% yield, dr: 2:1). **(1*R*\*,5*S*\*,6*R*\*,7*S*\*) Diastereomer** (major): Mp: 170-172°C (hexane/EtOAc). IR(neat) 3028, 2984, 2876, 1598, 1496, 1450, 1342, 1165  $\text{cm}^{-1}$ .  $^1\text{H NMR}$ : (500.2 MHz,  $\text{CDCl}_3$ )  $\delta$  7.71 (d,  $J = 8.0$  Hz, 2H), 7.39-7.33 (m, 4H), 7.32-7.27 (m, 1H), 7.17-7.13 (m, 2H), 4.91 (dd,  $J = 9.0, 4.6$  Hz, 1H), 3.66 (d,  $J = 10.23$  Hz, 1H), 3.61-3.56 (m, 2H), 3.36-3.31 (m, 1H), 3.27 (dt,  $J = 8.2, 6.0$  Hz, 1H), 2.70 (dd,  $J = 10.2, 6.4$  Hz, 1H), 2.59 (dd,  $J = 10.2, 6.4$  Hz, 1H), 2.44 (s, 3H);  $^{13}\text{C NMR}$ : (125.8 MHz,  $\text{CDCl}_3$ )  $\delta$  144.0, 142.8, 131.5, 129.7, 128.12, 128.05, 128.0, 127.3, 53.4, 53.2, 49.0, 48.4, 42.2, 29.2, 21.5. HRMS (ESI) calculated for  $[\text{C}_{19}\text{H}_{21}\text{INO}_2\text{S}]^+([\text{M}+\text{H}]^+)$  requires  $m/z$  454.0333, found  $m/z$  454.0331. **(1*R*\*,5*S*\*,6*S*\*,7*S*\*) Diastereomer** (minor): Mp: 158-160°C (hexane/ $\text{CHCl}_3$ ). IR(neat) 3028, 2972, 2922,

2854, 1598, 1497, 1467, 1453, 1345, 1168  $\text{cm}^{-1}$ .  $^1\text{H NMR}$ : (500.2 MHz,  $\text{CDCl}_3$ )  $\delta$  7.79 (d,  $J = 8.3$  Hz, 2H), 7.38-7.32 (m, 4H), 7.29-7.25 (m, 1H), 7.23-7.20 (m, 2H), 4.73 (t,  $J = 8.8$  Hz, 1H), 3.93 (dd,  $J = 10.7, 1.4$  Hz, 1H), 3.76-3.71 (m, 1H), 3.58 (d,  $J = 9.8$  Hz, 1H), 3.19 (td,  $J = 6.9, 5.1$  Hz, 1H), 3.07 (dd,  $J = 10.7, 8.1$  Hz, 1H), 3.00-2.93 (m, 1H), 2.78 (dd,  $J = 9.8, 5.1$  Hz, 1H), 2.45 (s, 3H);  $^{13}\text{C NMR}$ : (125.8 MHz,  $\text{CDCl}_3$ )  $\delta$  143.8, 140.6, 132.4, 129.7, 128.8, 128.1, 127.3, 126.0, 54.9, 54.7, 54.1, 45.1, 41.2, 27.2, 21.6. HRMS (ESI) calculated for  $[\text{C}_{19}\text{H}_{24}\text{IN}_2\text{O}_2\text{S}]^+([\text{M}+\text{NH}_4]^+)$  requires  $m/z$  471.0598, found  $m/z$  471.0595.

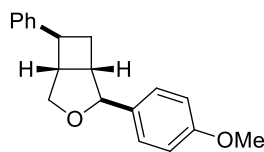

**(1S\*,2S\*,5R\*,6S\*)-2-(4-Methoxy-phenyl)-6-phenyl-3-oxa-bicyclo[3.2.0]heptane (24):**

Experiment 1: Prepared according to the general procedure using 3.3 mg (0.003 mmol) of  $\text{Ir}(\text{dF}(\text{CF}_3)\text{ppy})_2(\text{dtbbpy})(\text{PF}_6)$ , 84.0 mg (0.3 mmol) of 1-methoxy-4-[1-((*E*)-3-phenyl-allyloxy)-allyl]-benzene, and 30 mL (0.01 M) of DMSO. After 36 h, the reaction mixture was worked up and purified by flash column chromatography using 30:1 hexanes/EtOAc as the eluent to give 67.2 mg (0.24 mmol, 80% yield, dr: 9:1) of cycloadduct as an oil.

Experiment 2: 3.3 mg (0.003 mmol) of  $\text{Ir}(\text{dF}(\text{CF}_3)\text{ppy})_2(\text{dtbbpy})(\text{PF}_6)$ , 83.4 mg (0.3 mmol) of 1-methoxy-4-[1-((*E*)-3-phenyl-allyloxy)-allyl]-benzene, and 30 mL (0.01 M) of DMSO. Isolated 67.5 mg (0.24 mmol, 81% yield, dr: 9:1). IR(neat) 2957, 2931, 2855, 1611, 1511, 1246  $\text{cm}^{-1}$ .  $^1\text{H NMR}$ : (499.9 MHz,  $\text{CDCl}_3$ )  $\delta$  7.36-7.31 (m, 2H), 7.30-7.27 (m, 2H), 7.25-7.18 (m, 3H), 6.87 (d,  $J = 8.4$  Hz, 2H), 5.09 (s, 1H), 4.01 (d,  $J = 9.2$  Hz, 1H), 3.90 (dd,  $J = 9.5, 5.5$  Hz, 1H), 3.79 (s, 3H), 3.41 (td,  $J = 8.4, 5.5$  Hz, 1H), 3.21-3.15 (m, 1H), 3.13-3.08 (m, 1H), 2.45-2.41 (m, 2H);  $^{13}\text{C NMR}$ : (125.7 MHz,  $\text{CDCl}_3$ )  $\delta$  158.7, 145.8, 134.3, 128.5, 127.1, 126.4, 126.0, 113.7, 86.3, 72.8, 55.3, 48.1, 42.4, 41.8, 31.6. HRMS (EI) calculated for  $[\text{C}_{19}\text{H}_{20}\text{O}_2]^+(\text{M}^+)$  requires  $m/z$  280.1458, found  $m/z$  280.1462.

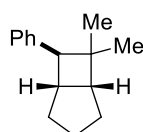

**(1S\*,5R\*,7S\*)-6,6-Dimethyl-7-phenyl-bicyclo[3.2.0]heptane (25):**

Experiment 1: Prepared according to the general procedure using 3.3 mg (0.003 mmol) of  $\text{Ir}(\text{dF}(\text{CF}_3)\text{ppy})_2(\text{dtbbpy})(\text{PF}_6)$ , 59.5 mg (0.3 mmol) of ((*Z*)-7-methyl-octa-1,6-dienyl)-benzene, and 30 mL (0.01 M) of DMSO. After 38 h, the reaction mixture was worked up and purified by flash column chromatography using hexanes as the eluent to give 49.6 mg (0.25 mmol, 83% yield, dr: >10:1) of cycloadduct as an oil.

Experiment 2: 3.3 mg (0.003 mmol) of  $\text{Ir}(\text{dF}(\text{CF}_3)\text{ppy})_2(\text{dtbbpy})(\text{PF}_6)$ , 61.2 mg (0.3 mmol) of ((*Z*)-7-methyl-octa-1,6-dienyl)-benzene, and 30 mL (0.01 M) of DMSO. Isolated 55.0 mg (0.28 mmol, 90% yield, dr: >10:1). IR(neat) 2950, 2859, 1602, 1497, 1447  $\text{cm}^{-1}$ .  $^1\text{H NMR}$ : (500.2 MHz,  $\text{CDCl}_3$ )  $\delta$  7.30-7.26 (m, 2H), 7.19-7.13 (m, 3H), 3.14-3.08 (m, 1H), 2.74 (d,  $J = 7.8$  Hz, 1H), 2.17 (dd,  $J = 8.8, 8.1$  Hz, 1H), 1.87-1.79 (m, 3H), 1.57-1.43 (m, 3H), 1.02 (s, 3H), 0.71 (s, 3H);  $^{13}\text{C NMR}$ : (125.7 MHz,  $\text{CDCl}_3$ )  $\delta$  141.8, 127.8, 127.7, 125.5, 51.8, 46.0, 37.5, 37.4, 31.1, 27.2, 27.0, 26.8, 24.3. HRMS (EI) calculated for  $[\text{C}_{15}\text{H}_{20}]^+(\text{M}^+)$  requires  $m/z$  200.1560, found  $m/z$  200.1561.

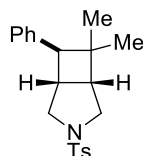

**(1R,5R,7S)-6,6-Dimethyl-7-phenyl-3-(toluene-4-sulfonyl)-3-aza-bicyclo[3.2.0]heptane (26)**

Experiment 1: Prepared according to the general procedure using 3.3 mg (0.003 mmol) of  $\text{Ir}(\text{dF}(\text{CF}_3)\text{ppy})_2(\text{dtbbpy})(\text{PF}_6)$ , 105.0 mg (0.3 mmol) of 4-methyl-*N*-(3-methyl-but-2-enyl)-*N*-((*E*)-3-phenyl-allyl)-benzenesulfonamide, and 30 mL (0.01 M) of DMSO. After 12 h, the reaction mixture was worked up and purified by flash column chromatography using 10:1 hexanes/EtOAc as the eluent to give 94.6 mg (0.27 mmol, 90% yield, dr: >10:1) of cycloadduct as a white solid.

Experiment 2: 3.3 mg (0.003 mmol) of  $\text{Ir}(\text{dF}(\text{CF}_3)\text{ppy})_2(\text{dtbbpy})(\text{PF}_6)$ , 106.5 mg (0.3 mmol) of 4-methyl-*N*-(3-methyl-but-2-enyl)-*N*-((*E*)-3-phenyl-allyl)-benzenesulfonamide, and 30 mL (0.01 M) of DMSO. Isolated 90.3 mg (0.25 mmol, 85% yield, dr: >10:1). Mp: 172-174  $^\circ\text{C}$  (hexane/ $\text{CHCl}_3$ ). IR(neat) 2951, 2863, 1599, 1495, 1338, 1161  $\text{cm}^{-1}$ .  $^1\text{H NMR}$ : (500.2 MHz,  $\text{CDCl}_3$ )  $\delta$  7.73 (d,  $J = 8.2$  Hz, 2H), 7.34 (d,  $J = 8.2$  Hz, 2H), 7.29 (t,  $J = 7.6$  Hz, 2H), 7.19 (t,  $J = 7.6$  Hz, 1H), 7.09 (d,  $J = 7.2$  Hz, 2H), 3.72 (d,  $J = 10.5$  Hz, 1H), 3.42 (d,  $J = 9.6$  Hz, 1H), 3.21 (d,  $J = 7.2$  Hz, 1H), 3.15 (td,  $J = 7.9, 5.5$  Hz, 1H), 2.64 (dd,  $J = 10.5, 7.9$  Hz, 1H), 2.61 (dd,  $J = 9.6, 5.5$  Hz, 1H), 2.44 (s, 3H), 2.28 (t,  $J = 7.9$  Hz, 1H), 1.17 (s, 3H), 0.70 (s, 3H);  $^{13}\text{C NMR}$ : (125.7 MHz,  $\text{CDCl}_3$ )  $\delta$  143.5, 139.9, 132.0, 129.5, 128.1, 128.0, 127.5, 126.1, 52.9, 51.7, 48.9, 45.0, 37.7, 36.3, 26.1, 24.2, 21.5. HRMS (ESI) calculated for  $[\text{C}_{21}\text{H}_{26}\text{NO}_2\text{S}]^+([\text{M}+\text{H}]^+)$  requires  $m/z$  356.1679, found  $m/z$  356.1684.

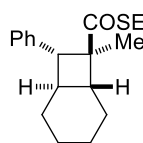

**7-Methyl-8-phenyl-bicyclo[4.2.0]octane-7-carbothioic acid S-ethyl ester (27):**

Experiment 1: Prepared according to the general procedure using 3.3 mg (0.003 mmol) of  $\text{Ir}(\text{dF}(\text{CF}_3)\text{ppy})_2(\text{dtbbpy})(\text{PF}_6)$ , 86.4 mg (0.3 mmol) of (*2E,8E*)-2-methyl-9-phenyl-nona-2,8-dienethioic acid S-ethyl ester, and 30 mL (0.01 M) of DMSO. After 36 h, the reaction mixture was worked up and purified by flash column chromatography using 100:1 hexanes/EtOAc as the eluent

to give 67.5 mg (0.23 mmol, 78% yield, dr: 3:1) of cycloadduct as a colorless oil. Experiment 2: 3.3 mg (0.003

mmol) of Ir(dF(CF<sub>3</sub>)ppy)<sub>2</sub>(dtbbpy)(PF<sub>6</sub>), 86.4 mg (0.3 mmol) of (2*E*,8*E*)-2-methyl-9-phenyl-nona-2,8-dienethioic acid *S*-ethyl ester, and 30 mL (0.01 M) of DMSO. Isolated 70.7 mg (0.25 mmol, 82% yield, dr: 3:1). **(1*R*\*,6*R*\*,7*S*\*,8*S*\*) Diastereomer** (major): IR(neat) 2967, 2928, 2855, 1676, 1448, 967 cm<sup>-1</sup>. <sup>1</sup>H NMR: (500.2 MHz, CDCl<sub>3</sub>) δ 7.31-7.27 (m, 2H), 7.25-7.22 (m, 2H), 7.22-7.18 (m, 1H), 3.64 (d, *J* = 10.0 Hz, 1H), 2.91 (qd, *J* = 7.4, 1.2 Hz, 2H), 2.00-1.90 (m, 3H), 1.90-1.81 (m, 2H), 1.78-1.73 (m, 1H), 1.48-1.34 (m, 4H), 1.28 (t, *J* = 7.4 Hz, 3H), 1.02 (s, 3H); <sup>13</sup>C NMR: (125.8 MHz, CDCl<sub>3</sub>) δ 205.0, 139.4, 128.0, 127.9, 126.2, 60.4, 52.2, 48.1, 41.1, 31.0, 26.7, 26.5, 26.2, 23.0, 14.8, 13.0. HRMS (EI) calculated for [C<sub>18</sub>H<sub>24</sub>OS]<sup>+</sup>(M<sup>+</sup>) requires *m/z* 288.1543, found *m/z* 288.1537. **(1*S*\*,6*R*\*,7*S*\*,8*R*\*) Diastereomer** (minor): IR(neat) 2930, 2854, 1667, 1449, 955 cm<sup>-1</sup>. <sup>1</sup>H NMR: (500.2 MHz, CDCl<sub>3</sub>) δ 7.26 (t, *J* = 7.5 Hz, 2H), 7.17 (t, *J* = 7.5 Hz, 1H), 7.14-7.11 (m, 2H), 3.41 (d, *J* = 11.3 Hz, 1H), 3.12-3.04 (m, 1H), 2.79 (dt, *J* = 10.9, 8.2 Hz, 1H), 2.59 (qq, *J* = 13.3, 7.4 Hz, 2H), 1.81-1.73 (m, 1H), 1.73-1.67 (m, 1H), 1.67-1.46 (m, 7H), 1.42-1.33 (m, 1H), 1.25-1.16 (m, 1H), 0.92 (t, 3H); <sup>13</sup>C NMR: (125.8 MHz, CDCl<sub>3</sub>) δ 203.8, 139.2, 128.0, 127.5, 126.4, 59.3, 53.1, 36.5, 31.7, 24.8, 23.7, 23.0, 22.8, 21.8, 19.5, 14.4. HRMS (EI) calculated for [C<sub>18</sub>H<sub>24</sub>OS]<sup>+</sup>(M<sup>+</sup>) requires *m/z* 288.1543, found *m/z* 288.1542.

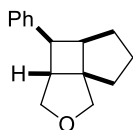

**(3*aR*\*,4*S*\*,4*aR*\*,7*aS*\*)-4-Phenyl-hexahydro-2-oxa-cyclobuta[1,2:1,4]dicyclopentene (28):**

Experiment 1: Prepared according to the general procedure using 3.3 mg (0.003 mmol) of Ir(dF(CF<sub>3</sub>)ppy)<sub>2</sub>(dtbbpy)(PF<sub>6</sub>), 64.2 mg (0.3 mmol) of [(*E*)-3-(cyclopent-1-enylmethoxy)-propenyl]-benzene, and 30 mL (0.01 M) of DMSO. After 21 h, the reaction mixture was worked up and purified by flash column chromatography using 30:1 hexanes/EtOAc as the eluent to give 47.6 mg (0.22 mmol, 73% yield, dr: 6:1) of cycloadduct as an oil. Experiment 2: 3.3 mg (0.003 mmol) of Ir(dF(CF<sub>3</sub>)ppy)<sub>2</sub>(dtbbpy)(PF<sub>6</sub>), 64.8 mg (0.3 mmol) of [(*E*)-3-(cyclopent-1-enylmethoxy)-propenyl]-benzene, and 30 mL (0.01 M) of DMSO. Isolated 51.7 mg (0.24 mmol, 79% yield, dr: 5:1). IR(neat) 2950, 2842, 1604, 1497, 1447, 1346, 1033 cm<sup>-1</sup>. <sup>1</sup>H NMR: (500.2 MHz, CDCl<sub>3</sub>) δ 7.34-7.29 (m, 2H), 7.18 (t, *J* = 7.4 Hz, 1H), 7.14-7.11 (m, 2H), 4.03 (d, *J* = 9.3 Hz, 1H), 3.87 (d, *J* = 9.3 Hz, 1H), 3.66 (dd, *J* = 9.3, 5.1 Hz, 1H), 3.53 (d, *J* = 9.3 Hz, 1H), 3.44 (dd, *J* = 9.5, 6.8 Hz, 1H), 2.76 (t, *J* = 5.7 Hz, 1H), 2.71 (t, *J* = 8.8 Hz, 1H), 1.70-1.61 (m, 2H), 1.55-1.40 (m, 3H), 1.36-1.30 (m, 1H); <sup>13</sup>C NMR: (125.7 MHz, CDCl<sub>3</sub>) δ 140.2, 128.1, 127.5, 125.6, 75.1, 73.9, 54.3, 44.8, 44.6, 41.4, 32.9, 27.5, 26.6. HRMS (EI) calculated for [C<sub>15</sub>H<sub>18</sub>O]<sup>+</sup>(M<sup>+</sup>) requires *m/z* 214.1353, found *m/z* 214.1354.

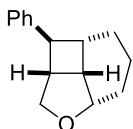

**(1*S*\*,1*aR*\*,3*aS*\*,6*aS*\*,6*bS*\*)-1-Phenyl-octahydro-3-oxa-cyclobut[cd]indene (29):**

Experiment 1: Prepared according to the general procedure using 3.3 mg (0.003 mmol) of Ir(dF(CF<sub>3</sub>)ppy)<sub>2</sub>(dtbbpy)(PF<sub>6</sub>), 64.2 mg (0.3 mmol) of [(*E*)-3-(cyclohex-2-enyloxy)-propenyl]-benzene, and 30 mL (0.01 M) of DMSO. After 24 h, the reaction mixture was worked up and purified by flash column chromatography using 30:1 hexanes/EtOAc as the eluent to give 48.7 mg (0.23 mmol, 76% yield, dr: 9:1) of cycloadduct as an oil. Experiment 2: 3.3 mg (0.003 mmol) of Ir(dF(CF<sub>3</sub>)ppy)<sub>2</sub>(dtbbpy)(PF<sub>6</sub>), 64.1 mg (0.3 mmol) of [(*E*)-3-(cyclohex-2-enyloxy)-propenyl]-benzene, and 30 mL (0.01 M) of DMSO. Isolated 47.4 mg (0.22 mmol, 74% yield, dr: 9:1). IR(neat) 2935, 2841, 1601, 1497, 1452, 1069, 1035 cm<sup>-1</sup>. <sup>1</sup>H NMR: (500.2 MHz, CDCl<sub>3</sub>) δ 7.33-7.28 (m, 2H), 7.24-7.21 (m, 2H), 7.21-7.16 (m, 1H), 4.02 (dt, *J* = 7.1, 2.1 Hz, 1H), 3.95 (d, *J* = 9.1 Hz, 1H), 3.58 (dd, *J* = 9.1, 3.9 Hz, 1H), 3.25 (t, *J* = 8.1 Hz, 1H), 2.92 (td, *J* = 7.1, 3.9 Hz, 1H), 2.67 (q, *J* = 7.7 Hz, 1H), 2.54-2.47 (m, 1H), 2.13-2.06 (m, 1H), 2.04-1.92 (m, 1H), 1.62-1.56 (m, 1H), 1.53-1.35 (m, 3H); <sup>13</sup>C NMR: (125.7 MHz, CDCl<sub>3</sub>) δ 145.3, 128.3, 126.6, 125.9, 75.5, 72.8, 45.2, 43.5, 35.2, 35.0, 27.4, 25.8, 14.7. HRMS (EI) calculated for [C<sub>15</sub>H<sub>18</sub>O]<sup>+</sup>(M<sup>+</sup>) requires *m/z* 214.1353, found *m/z* 214.1360.

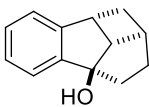

**(3*aR*\*,7*bR*\*,7*cS*\*)-1,1*a*,2,3,7*b*,7*c*-Hexahydro-benzo[a]cyclobuta[cd]pentalen-3*a*-ol (30):**

Experiment 1: Prepared according to the general procedure using 3.3 mg (0.003 mmol) of Ir(dF(CF<sub>3</sub>)ppy)<sub>2</sub>(dtbbpy)(PF<sub>6</sub>), 55.8 mg (0.3 mmol) of 1-but-3-enyl-1*H*-inden-1-ol, and 30 mL (0.01 M) of DMSO. After 3 h, the reaction mixture was worked up and purified by flash column chromatography using 10:1 hexanes/EtOAc as the eluent to give 50.3 mg (0.27 mmol, 90% yield, dr: >10:1) of cycloadduct as a white solid. Experiment 2: 3.3 mg (0.003 mmol) of Ir(dF(CF<sub>3</sub>)ppy)<sub>2</sub>(dtbbpy)(PF<sub>6</sub>), 55.8 mg (0.3 mmol) of 1-but-3-enyl-1*H*-inden-1-ol, and 30 mL (0.01 M) of DMSO. Isolated 49.7 mg (0.27 mmol, 89% yield, dr: >10:1). Mp: 96-97 °C. IR(neat) 3254, 2959, 2924, 2862, 1477, 1456, 1442, 1312, 1059 cm<sup>-1</sup>. <sup>1</sup>H NMR: (500.2 MHz, CDCl<sub>3</sub>) δ 7.46-7.42 (m, 1H), 7.31-7.26 (m, 2H), 7.16-7.12 (m, 1H), 3.77-3.72 (m, 1H), 3.08 (dd, *J* = 8.9, 6.9 Hz, 1H), 2.90-2.81 (m, 1H), 2.76 (dt, *J* = 11.7, 9.1 Hz, 1H), 2.20-2.09 (m, 3H), 2.06-1.99 (m, 1H), 1.35 (dt, *J* = 11.7, 2.9 Hz, 1H), 1.12-1.03 (m, 1H); <sup>13</sup>C NMR: (125.8 MHz, CDCl<sub>3</sub>) δ 148.4, 148.3, 128.9, 127.3, 123.9, 123.7, 93.0, 54.9, 42.2, 41.0, 35.4, 34.8, 31.9. HRMS (EI) calculated for [C<sub>13</sub>H<sub>14</sub>O]<sup>+</sup>(M<sup>+</sup>) requires *m/z* 186.1040, found *m/z* 186.1044.

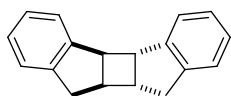

**(4bR\*,4cR\*,9aR\*,9bR\*)-4b,4c,9,9a,9b,10-hexahydrocyclobuta[1,2-a:4,3-a']diindene**

**(31):** Experiment 1: Prepared according to the general procedure using 3.3 mg (0.003 mmol) of Ir(dF(CF<sub>3</sub>)ppy)<sub>2</sub>(dtbbpy)(PF<sub>6</sub>), 69.6 mg (0.6 mmol) of indene, and 30 mL (0.02 M) of DMSO. After 40 h, the reaction mixture was worked up and purified by flash column chromatography using 60:1 hexanes/EtOAc as the eluent to give 48.7 mg (0.21 mmol, 70% yield, dr: 4:1 (ratio of major isomer to all other isomers, as determined by <sup>1</sup>H NMR)) of cycloadduct as a white solid. Experiment 2: 3.3 mg (0.003 mmol) of Ir(dF(CF<sub>3</sub>)ppy)<sub>2</sub>(dtbbpy)(PF<sub>6</sub>), 70.0 mg (0.3 mmol) of indene, and 30 mL (0.02 M) of DMSO. Isolated 49.1 mg (0.21 mmol, 70% yield, dr: 4:1). Mp: 110-111 °C (hexane) (lit.<sup>24</sup> 110-112 °C). IR(neat) 2940, 2906, 2835, 1476, 1456 cm<sup>-1</sup>. <sup>1</sup>H NMR: (500.2 MHz, CDCl<sub>3</sub>) δ 7.41 (d, J = 6.9 Hz, 2H), 7.31 (d, J = 7.4 Hz, 2H), 7.29-7.21 (m, 4H), 3.70 (d, J = 5.6 Hz, 2H), 3.19 (dd, J = 16.5, 7.6 Hz, 2H), 2.94 (d, J = 16.5 Hz, 2H), 2.80-2.74 (m, 2H); <sup>13</sup>C NMR: (125.8 MHz, CDCl<sub>3</sub>) δ 146.6, 144.0, 126.79, 126.76, 125.4, 125.2, 54.0, 43.1, 39.4. HRMS (EI) calculated for [C<sub>18</sub>H<sub>16</sub>]<sup>+</sup>(M<sup>+</sup>) requires *m/z* 232.1247, found *m/z* 232.1238.

#### IV. Synthesis of (±)-cannabiorcicyclic acid

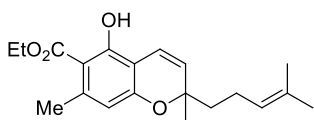

**(±)-Ethyl cannabiorcichromenic ester (35):** A mixture of ethyl 2,4-dihydroxy-6-methylbenzoate (50 mg, 0.25 mmol), citral (0.42 mL, 10 eq), and Ca(OH)<sub>2</sub> (185 mg, 10 eq) in *i*PrOH (1 mL) was placed in a sealed tube and heated at 140 °C for 48 h, then allowed to cool to room temperature. The reaction mixture was diluted with dichloromethane (100 mL), washed with aq. HCl (1 M) and brine, dried over Na<sub>2</sub>SO<sub>4</sub>, and concentrated under reduced pressure. The crude residue was purified by flash column chromatography (100:1 hexanes/Et<sub>2</sub>O) to afford 45.8 mg (0.14 mmol, 54% yield) of the title compound as a white solid. All analytical data were consistent with previously reported values.<sup>25</sup>

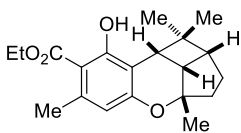

**(±)-Ethyl cannabiorcicyclic ester (36):** A solution of 2.2 mg (0.002 mmol) of Ir(dF(CF<sub>3</sub>)ppy)<sub>2</sub>(dtbbpy)(PF<sub>6</sub>) and 66.0 mg (0.2 mmol) of ethyl cannabiorcichromenic ester in DMSO (20 mL, 0.01 M) was placed in a test tube (20 x 150 mm). The reaction was stirred in front of a 23 W (1380 lumen) compact fluorescent lamp at a distance of 10 cm. After 8 h, the reaction mixture was diluted with Et<sub>2</sub>O (60 mL) and water (10 mL). The aqueous layer was separated and extracted with ether (60 mL x 2). The combined organic layers were washed with water (10 mL x 2), brine (20 mL), dried over Na<sub>2</sub>SO<sub>4</sub>, filtered, and concentrated *in vacuo*. The residue was purified by flash column chromatography using 100:1 hexanes/Et<sub>2</sub>O as the eluent to give 56.7 mg (86% yield) of cycloadduct as a white solid. Mp: 118-119 °C (hexane/EtOAc). IR(neat) 2951, 2863, 1636, 1570, 1261 cm<sup>-1</sup>. <sup>1</sup>H NMR: (500.2 MHz, CDCl<sub>3</sub>) δ 11.90 (s, 1H), 6.25 (s, 1H), 4.38 (q, J = 7.3 Hz, 2H), 3.12 (d, J = 9.5 Hz, 1H), 2.57 (dd, J = 9.6, 7.3 Hz, 1H), 2.47 (s, 3H), 2.41 (t, J = 7.3 Hz, 1H), 1.92 (td, J = 13.1, 8.0 Hz, 1H), 1.71-1.63 (m, 2H), 1.63-1.56 (m, 1H), 1.42-1.37 (m, 9H), 0.78 (s, 3H); <sup>13</sup>C NMR: (125.8 MHz, CDCl<sub>3</sub>) δ 172.2, 163.4, 157.8, 140.1, 113.1, 109.7, 104.6, 84.1, 61.0, 46.5, 39.1, 38.5, 37.5, 36.0, 33.6, 27.6, 25.7, 24.2, 17.7, 14.3. HRMS (ESI) calculated for [C<sub>20</sub>H<sub>27</sub>O<sub>4</sub>]<sup>+</sup>([M+H]<sup>+</sup>) requires *m/z* 331.1904, found *m/z* 331.1911.

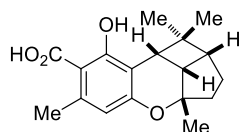

**(±)-Cannabiorcicyclic acid (37):** To a solution of ethyl cannabiorcicyclic ester (33.0 mg, 0.1 mmol) in methanol (0.2 mL) and THF (0.5 mL) was added 5 M aq. LiOH (2 mL). The reaction mixture was stirred at 60 °C for 8 h before it was acidified with 1 M aq. HCl, and extracted with CH<sub>2</sub>Cl<sub>2</sub>. The combined organic layers were washed with brine, dried over Na<sub>2</sub>SO<sub>4</sub>, and concentrated under reduced pressure. The crude residue was purified by flash column chromatography (1:1 hexanes/EtOAc) to afford 29.3 mg (0.1 mmol, 97% yield) of the title compound as a white solid. Mp: 174-176 °C (hexane/CHCl<sub>3</sub>). IR(neat) 3060, 2942, 2861, 1618, 1576, 1453, 1257 cm<sup>-1</sup>. <sup>1</sup>H NMR: (500.2 MHz, CDCl<sub>3</sub>) δ 11.64 (bs, 1H), 6.29 (s, 1H), 3.12 (d, J = 9.5 Hz, 1H), 2.58 (dd, J = 9.5, 7.5 Hz, 1H), 2.53 (s, 3H), 2.42 (t, J = 7.5 Hz, 1H), 1.92 (td, J = 12.8, 7.4 Hz, 1H), 1.69 (dd, J = 12.8, 7.4 Hz, 2H), 1.64-1.54 (m, 1H), 1.41 (s, 3H), 1.39 (s, 3H), 0.79 (s, 3H); <sup>13</sup>C NMR: (125.8 MHz, CDCl<sub>3</sub>) δ 176.0, 164.4, 159.0, 141.6, 113.6, 109.7, 103.1, 84.4, 46.5, 39.1, 38.7, 37.5, 35.9, 33.6, 27.6, 25.7, 24.1, 17.7; HRMS (ESI) calculated for [C<sub>18</sub>H<sub>21</sub>O<sub>4</sub>]<sup>+</sup>([M-H]<sup>+</sup>) requires *m/z* 301.1445, found *m/z* 301.1438. <sup>1</sup>H and <sup>13</sup>C NMR spectral data obtained for this compound were identical to values reported for the natural product.<sup>26</sup>

## V. Photosensitized [2+2] Cycloaddition of 5

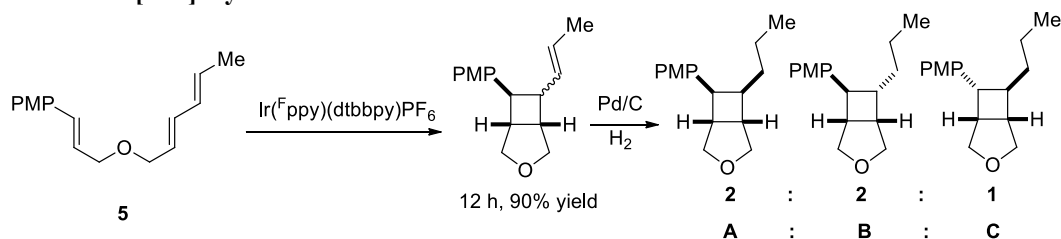

**Procedure.** A solution of 3.3 mg (0.003 mmol) of  $\text{Ir}(\text{dF}(\text{CF}_3)\text{ppy})_2(\text{dtbbpy})(\text{PF}_6)$  and 73.2 mg (0.3 mmol) of 1-[(*E*)-3-[(*2E,4E*)-hexa-2,4-dienyl]oxy]-prop-1-en-3-yl 4-methoxybenzene<sup>27</sup> in DMSO (30 mL, 0.01 M) was placed in a test tube (20 x 150 mm). The reaction was stirred in front of a 23 W (1380 lumen) compact fluorescent lamp at a distance of 10 cm. After 12 h, the reaction mixture was diluted with  $\text{Et}_2\text{O}$  (60 mL) and water (10 mL). The aqueous layer was separated and extracted with ether (60 mL x 2). The combined organic layers were washed with water (10 mL x 2), brine (20 mL), dried over  $\text{Na}_2\text{SO}_4$ , filtered, and concentrated *in vacuo*. The residue was purified by flash column chromatography using 20:1 hexanes/ $\text{EtOAc}$  as the eluent to give an inseparable mixture of diastereomers. This oily mixture was placed in a round-bottomed flask with Pd/C (5%Pd, 95.4 mg, 5 mol%), and ethyl acetate (5 mL) equipped with a balloon of  $\text{H}_2$ . The mixture was stirred 4 h at room temperature and then filtered. The filtrate was concentrated and purified by flash column chromatography (20:1 hexanes/ $\text{EtOAc}$ ) to afford 65.0 mg (0.26 mmol, 87% yield, two steps) of the hydrogenation products as a colorless oil.

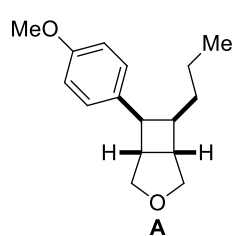

**(1*S*\*,5*R*\*,6*S*\*,7*R*\*)-6-(4-Methoxy-phenyl)-7-propyl-3-oxa-bicyclo[3.2.0]heptane:** IR(neat) 2955, 2920, 2842, 1611, 1513, 1248  $\text{cm}^{-1}$ .  $^1\text{H}$  NMR: (500.2 MHz,  $\text{CDCl}_3$ )  $\delta$  7.13 (d,  $J$  = 8.8 Hz, 2H), 6.85 (d,  $J$  = 8.8 Hz, 2H), 3.95 (d,  $J$  = 9.4 Hz, 1H), 3.92 (d,  $J$  = 9.2 Hz, 1H), 3.81 (s, 3H), 3.60-3.55 (m, 2H), 3.30 (dd,  $J$  = 9.4, 5.3 Hz, 1H), 3.08 (dt,  $J$  = 8.1, 5.4 Hz, 1H), 2.58-2.53 (m, 1H), 2.30-2.22 (m, 1H), 1.16-1.07 (m, 1H), 1.07-0.91 (m, 3H), 0.72 (t,  $J$  = 7.4 Hz, 3H);  $^{13}\text{C}$  NMR: (125.8 MHz,  $\text{CDCl}_3$ )  $\delta$  157.8, 133.6, 129.3, 113.3, 74.2, 74.0, 55.2, 44.6, 43.1, 42.1, 41.5, 33.5, 19.8, 14.1. HRMS (EI) calculated for  $[\text{C}_{16}\text{H}_{22}\text{O}_2]^+(\text{M}^+)$  requires  $m/z$  246.1615, found  $m/z$  246.1610.

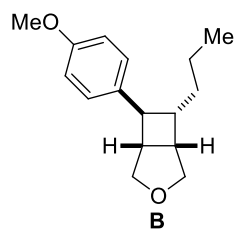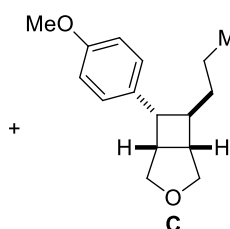

**(1*S*\*,5*R*\*,6*S*\*,7*S*\*)-6-(4-Methoxy-phenyl)-7-propyl-3-oxa-bicyclo[3.2.0]heptane (major) and (1*S*\*,5*R*\*,6*R*\*,7*R*\*)-6-(4-methoxy-phenyl)-7-propyl-3-oxa-bicyclo[3.2.0]heptane (minor):** IR(neat) 2956, 2921, 2844, 1611, 1513, 1247  $\text{cm}^{-1}$ .  $^1\text{H}$  NMR: (500.2 MHz,  $\text{CDCl}_3$ )  $\delta$  7.16 (d,  $J$  = 8.5 Hz, 1.46H), 7.13 (d,  $J$  = 8.5 Hz, 0.54H), 6.85 (d,  $J$  = 8.5 Hz, 2H), 4.13 (d,  $J$  = 9.7 Hz, 0.73H), 3.85 (d,  $J$  = 8.8 Hz, 0.27H), 3.84 (d,  $J$  = 9.1 Hz, 0.73H), 3.79 (s, 3H), 3.69 (d,  $J$  = 9.9 Hz, 0.27H), 3.50 (dd,  $J$  = 10.1, 6.7

Hz, 0.73H), 3.43 (dd,  $J$  = 8.7, 4.3 Hz, 0.27H), 3.40 (dd,  $J$  = 9.1, 4.5 Hz, 0.73H), 3.33 (dd,  $J$  = 9.7, 6.7 Hz, 0.27H), 3.13 (t,  $J$  = 8.9 Hz, 0.27H), 3.08-3.02 (m, 0.27H), 2.95-2.89 (m, 0.73H), 2.89-2.84 (m, 0.73H), 2.70-2.65 (m, 0.73H), 2.57-2.52 (m, 0.27H), 2.42-2.34 (m, 0.73H), 2.34-2.37 (m, 0.27H), 1.55-1.37 (m, 2H), 1.28-1.09 (m, 2H), 0.85 (t,  $J$  = 7.4 Hz, 0.81H), 0.83 (t,  $J$  = 7.4 Hz, 2.19H). HRMS (EI) calculated for  $[\text{C}_{16}\text{H}_{22}\text{O}_2]^+(\text{M}^+)$  requires  $m/z$  246.1615, found  $m/z$  246.1606.

## VI. Time course study of [2+2] cycloaddition of 3.

A solution of 3.3 mg (0.003 mmol) of  $\text{Ir}(\text{dF}(\text{CF}_3)\text{ppy})_2(\text{dtbbpy})(\text{PF}_6)$ , 60.6 mg (0.3 mmol) of [(*E*)-3-(3-methyl-but-2-enyloxy)-propenyl]-benzene, and 23.2 mg of decane as an internal standard in DMSO (30 mL, 0.01 M) was placed in a test tube (20 x 150 mm). The reaction was stirred in front of a 23 W (1380 lumen) compact fluorescent lamp at a distance of 10 cm. Yields were determined by GC analysis of aliquots sampled at 1 h intervals and are plotted below.

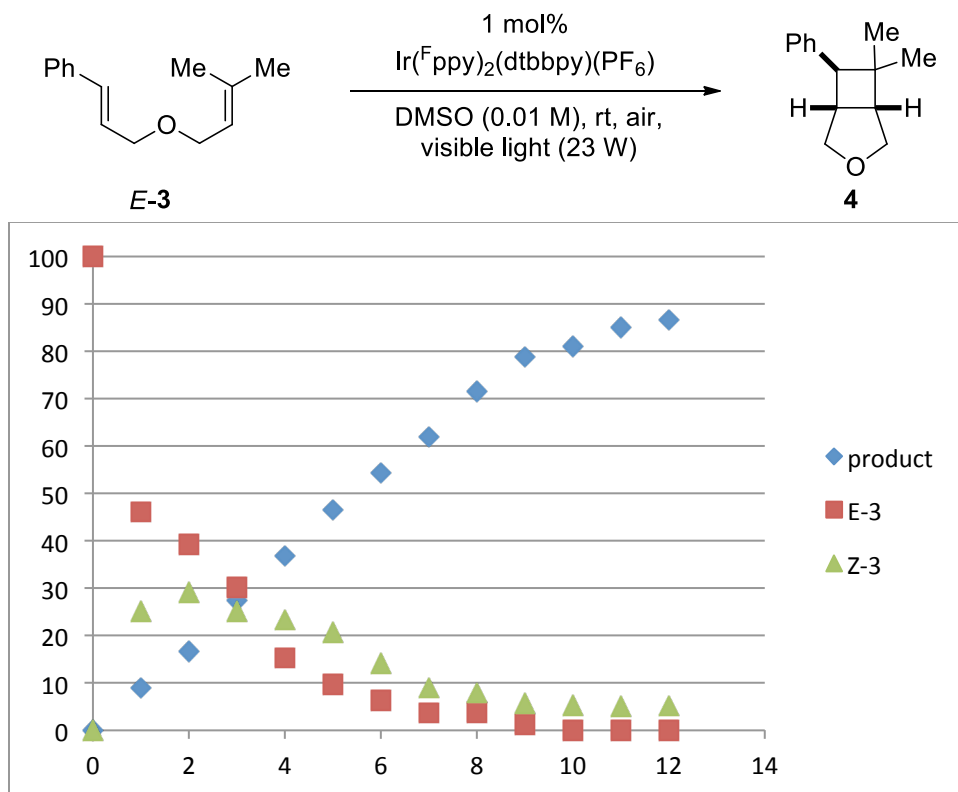

Figure S1 Time course studies.



**VI. Representative NOE data**

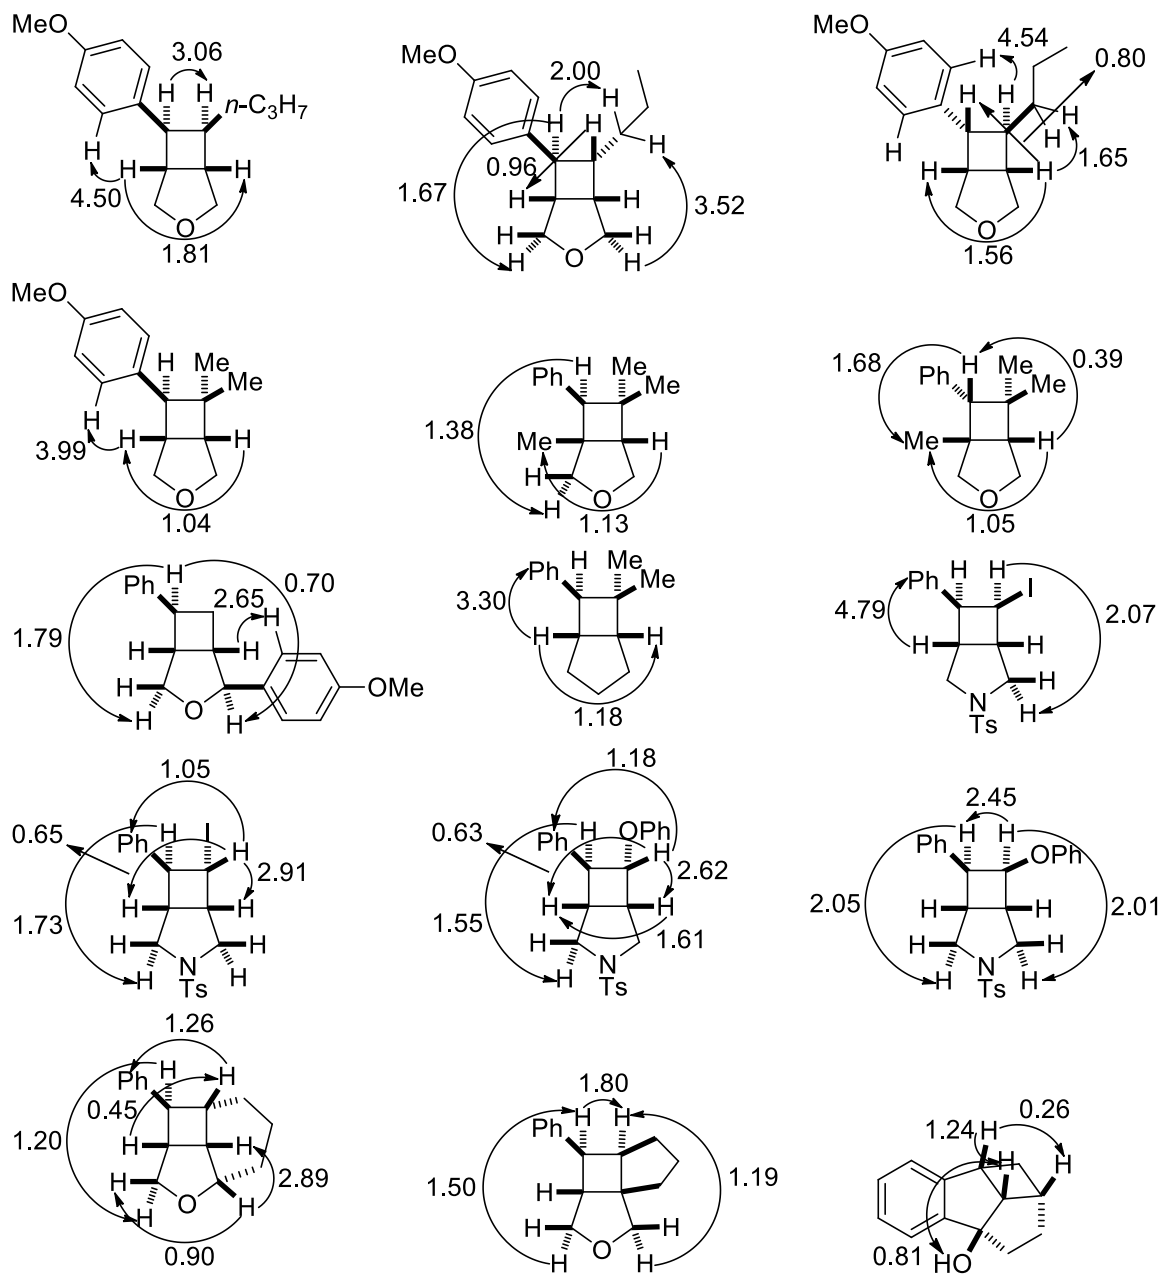

## VIII. References

- <sup>1</sup> Lowry, M. S.; Goldsmith, J. I.; Slinker, J. D.; Rohl, R.; Pascal, Jr., R. A.; Malliaras, G. G.; Bernhard, S. *Chem. Mater.* **2005**, *17*, 5712–5719.
- <sup>2</sup> Pangborn, A. B.; Giardello, M. A.; Grubbs, R. H.; Rosen, R. K.; Timmers, F. T. *Organometallics* **1996**, *15*, 1518–1520.
- <sup>3</sup> Still, W. C.; Kahn, M.; Hong, P. C.; Lu, L. *J. Org. Chem.* **1978**, *43*, 2923–2925.
- <sup>4</sup> Takeuchi, R.; Kashio, M. *J. Am. Chem. Soc.* **1998**, *120*, 8647–8655.
- <sup>5</sup> Graening, T.; Hartwig, J. F. *J. Am. Chem. Soc.* **2005**, *127*, 17192–17193.
- <sup>6</sup> Mori, M.; Watanuki, S. *J. Chem. Soc., Chem. Commun.* **1992**, *15*, 1082–1084.
- <sup>7</sup> Al-Arnaout, A.; Courtois, G.; Miginiac, L. *J. Organomet. Chem.* **1987**, *333*, 139–153.
- <sup>8</sup> Rai, G.; Thomas, C. J.; Leister, W.; Maloney, D. J. *Tetrahedron Lett.* **2009**, *50*, 1710–1713.
- <sup>9</sup> Takahashi, Y.; Okitsu, O.; Ando, M.; Miyashi, T. *Tetrahedron Lett.* **1994**, *35*, 3953–3956.
- <sup>10</sup> Nakamura, Y.; Fujii, T.; Nishimura, J. *Chem. Lett.* **2001**, 970–971.
- <sup>11</sup> Wagh, Y. S.; Sawant, D. N.; Tambade, P. J.; Dhake, K. P.; Bhanage, B. M. *Tetrahedron* **2011**, *67*, 2414–2421.
- <sup>12</sup> Werkhoven, T. M.; van Nispen, R.; Lugtenburg, J. *Eur. J. Org. Chem.* **1999**, 2909–2914.
- <sup>13</sup> Marqués-López, E.; Herrera, R. P.; Marks, T.; Jacobs, W. C.; Könnig, D.; de Figueiredo, R. M.; Christmann, M. *Org. Lett.* **2009**, *11*, 4116–4119.
- <sup>14</sup> Wang, S.-Y.; Mao, W.-W.; She, Z.-G.; Li, C.-R.; Yang, D.-Q.; Lin, Y.-C.; Fu, L.-W. *Bioorg. Med. Chem. Lett.* **2007**, *17*, 2785–2788.
- <sup>15</sup> Robin, S.; Rousseau, G. *Eur. J. Org. Chem.* **2000**, 3007–3011.
- <sup>16</sup> (a) de Carné-Carvalho, B.; Archambeau, A.; Meyer, C.; Cossy, J.; Folléas, B.; Brayer, J.-L.; Demoute, J.-P. *Org. Lett.* **2011**, *13*, 956–959. (b) Kiewel, K.; Luo, Z.; Sulikowski, G. A. *Org. Lett.* **2005**, *7*, 5163–5166.
- <sup>17</sup> Brozek, L. A.; Ardolino, M. J.; Morken, J. P. *J. Am. Chem. Soc.* **2011**, *133*, 16778–16781.
- <sup>18</sup> Petriguet, J.; Boudhar, A.; Blond, G.; Suffert, J. *Angew. Chem. Int. Ed.* **2011**, *50*, 3285–3289.
- <sup>19</sup> Schaumann, E.; Mergardt, B.; Fittkau, S. *Synthesis* **1990**, 47–51.
- <sup>20</sup> Hudson, C. M.; Marzabadi, M. R.; Moeller, K. D.; New, D. G. *J. Am. Chem. Soc.* **1991**, *113*, 7372–7385.
- <sup>21</sup> Kim, D. D.; Lee, S. J.; Beak, P. *J. Org. Chem.* **2005**, *70*, 5376–5386.
- <sup>22</sup> Zhao, Y.; Yeung, Y.-Y. *Org. Lett.* **2010**, *12*, 2128–2131.
- <sup>23</sup> Malik, C. K.; Vaultier, M.; Ghosh, S. *Synthesis* **2007**, 1247–1250.
- <sup>24</sup> Metzner, W.; Wendisch, D. *Liebigs Ann. Chem.* **1969**, *730*, 111–120.
- <sup>25</sup> Lee, Y. R.; Wang, X. *Bull. Korean Chem. Soc.* **2007**, *28*, 2061–2064.
- <sup>26</sup> Qin, C.; Mei, Y.; Zhou, X.; A, P.; Huang, S. *China J. Chin. Mat. Med.* **2010**, *35*, 2568–2571.
- <sup>27</sup> Lin, S.; Padilla, C. E.; Ischay, M. A.; Yoon, T. P. *Tetrahedron Lett.* **2012**, *53*, 3073–3076.

7.395  
7.392  
7.378  
7.323  
7.320  
7.309  
7.293  
7.255  
7.248  
7.245  
7.243  
7.235  
7.231  
7.227  
7.216  
6.623  
6.591  
6.338  
6.325  
6.313  
6.306  
6.294  
6.281  
5.409  
5.407  
5.401  
5.398  
5.396  
5.393  
5.390  
5.384  
5.382  
4.143  
4.141  
4.131  
4.129  
4.026  
4.012  
1.763  
1.690  
0.000

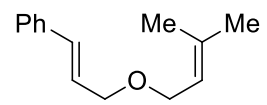

<sup>1</sup>H NMR  
500 MHz  
CDCl<sub>3</sub>

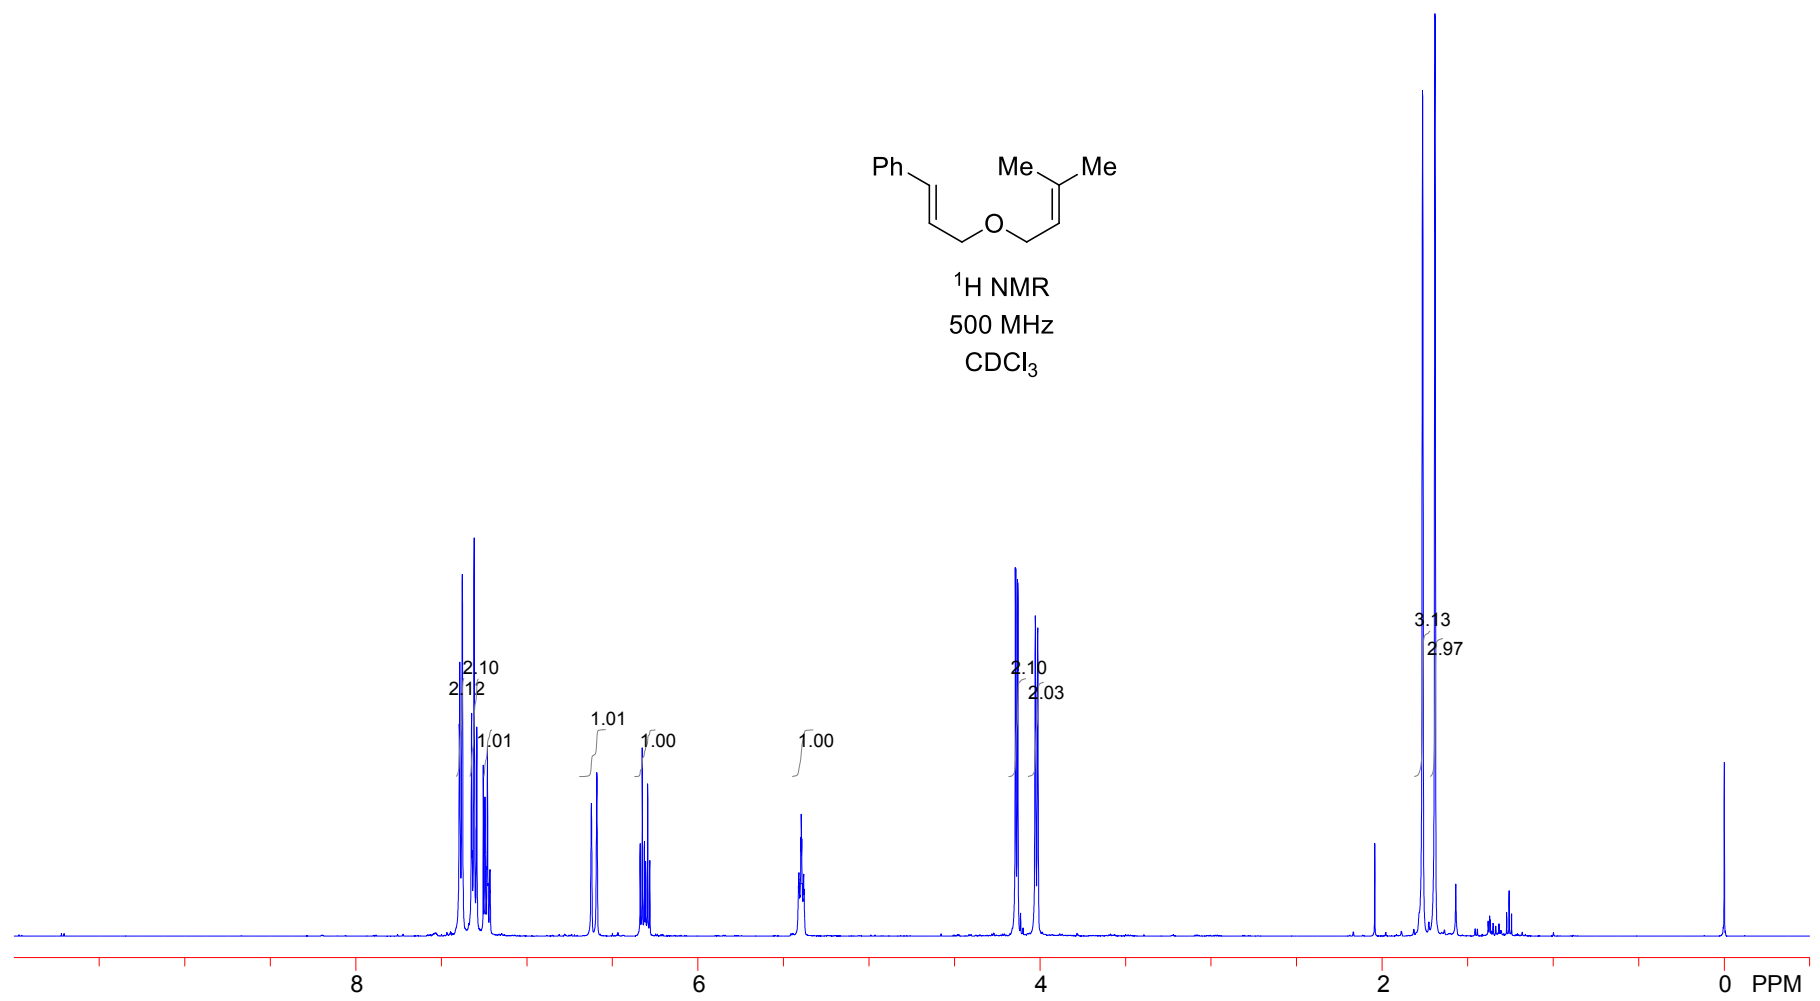

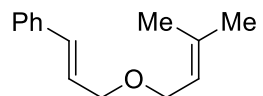

$^{13}\text{C}$  NMR  
125 MHz  
 $\text{CDCl}_3$

137.175  
136.799  
132.275  
128.504  
127.564  
126.445  
126.388  
121.021

77.253  
77.000  
76.742  
70.575  
66.576

25.802  
18.049

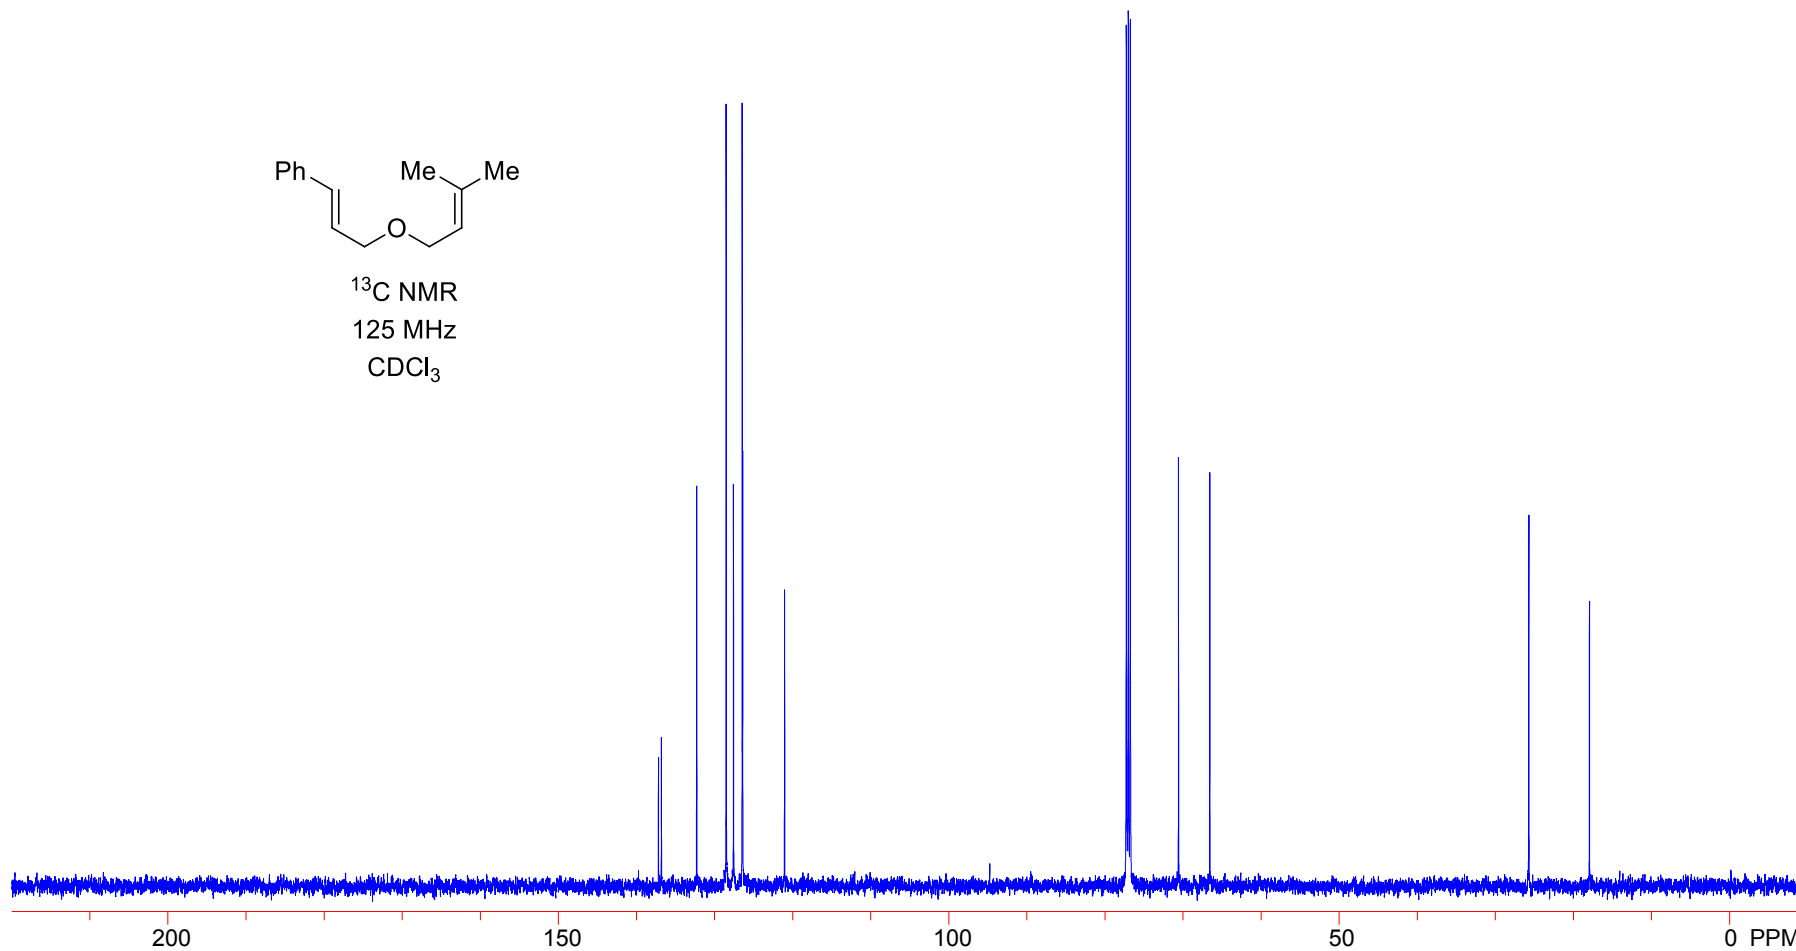

7.352  
7.349  
7.341  
7.338  
7.325  
7.322  
7.265  
7.263  
7.250  
7.246  
7.236  
7.233  
7.224  
7.209  
6.604  
6.581  
5.895  
5.882  
5.870  
5.859  
5.846  
5.382  
5.380  
5.371  
5.368  
5.366  
5.363  
5.357  
5.354  
4.250  
4.247  
4.238  
4.234  
3.982  
3.968

1.732  
1.650

-0.000

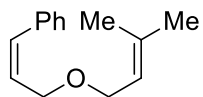

<sup>1</sup>H NMR  
500 MHz  
CDCl<sub>3</sub>

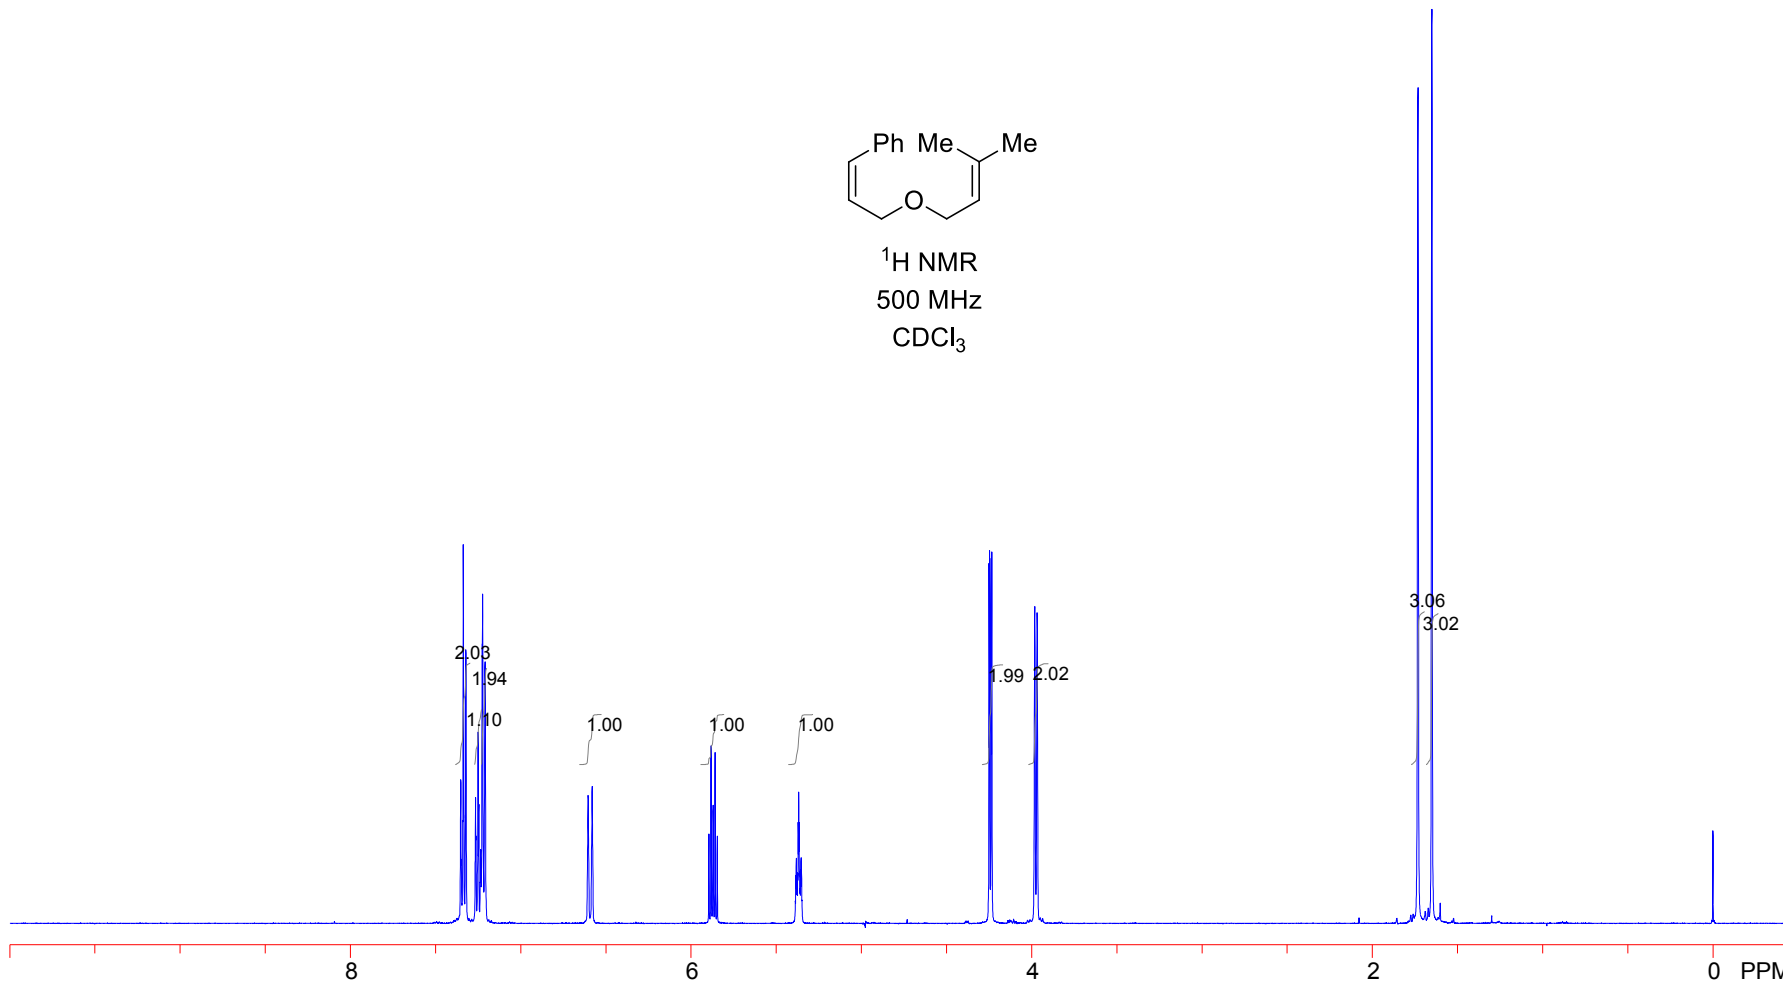

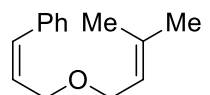

$^{13}\text{C}$  NMR  
125 MHz  
 $\text{CDCl}_3$

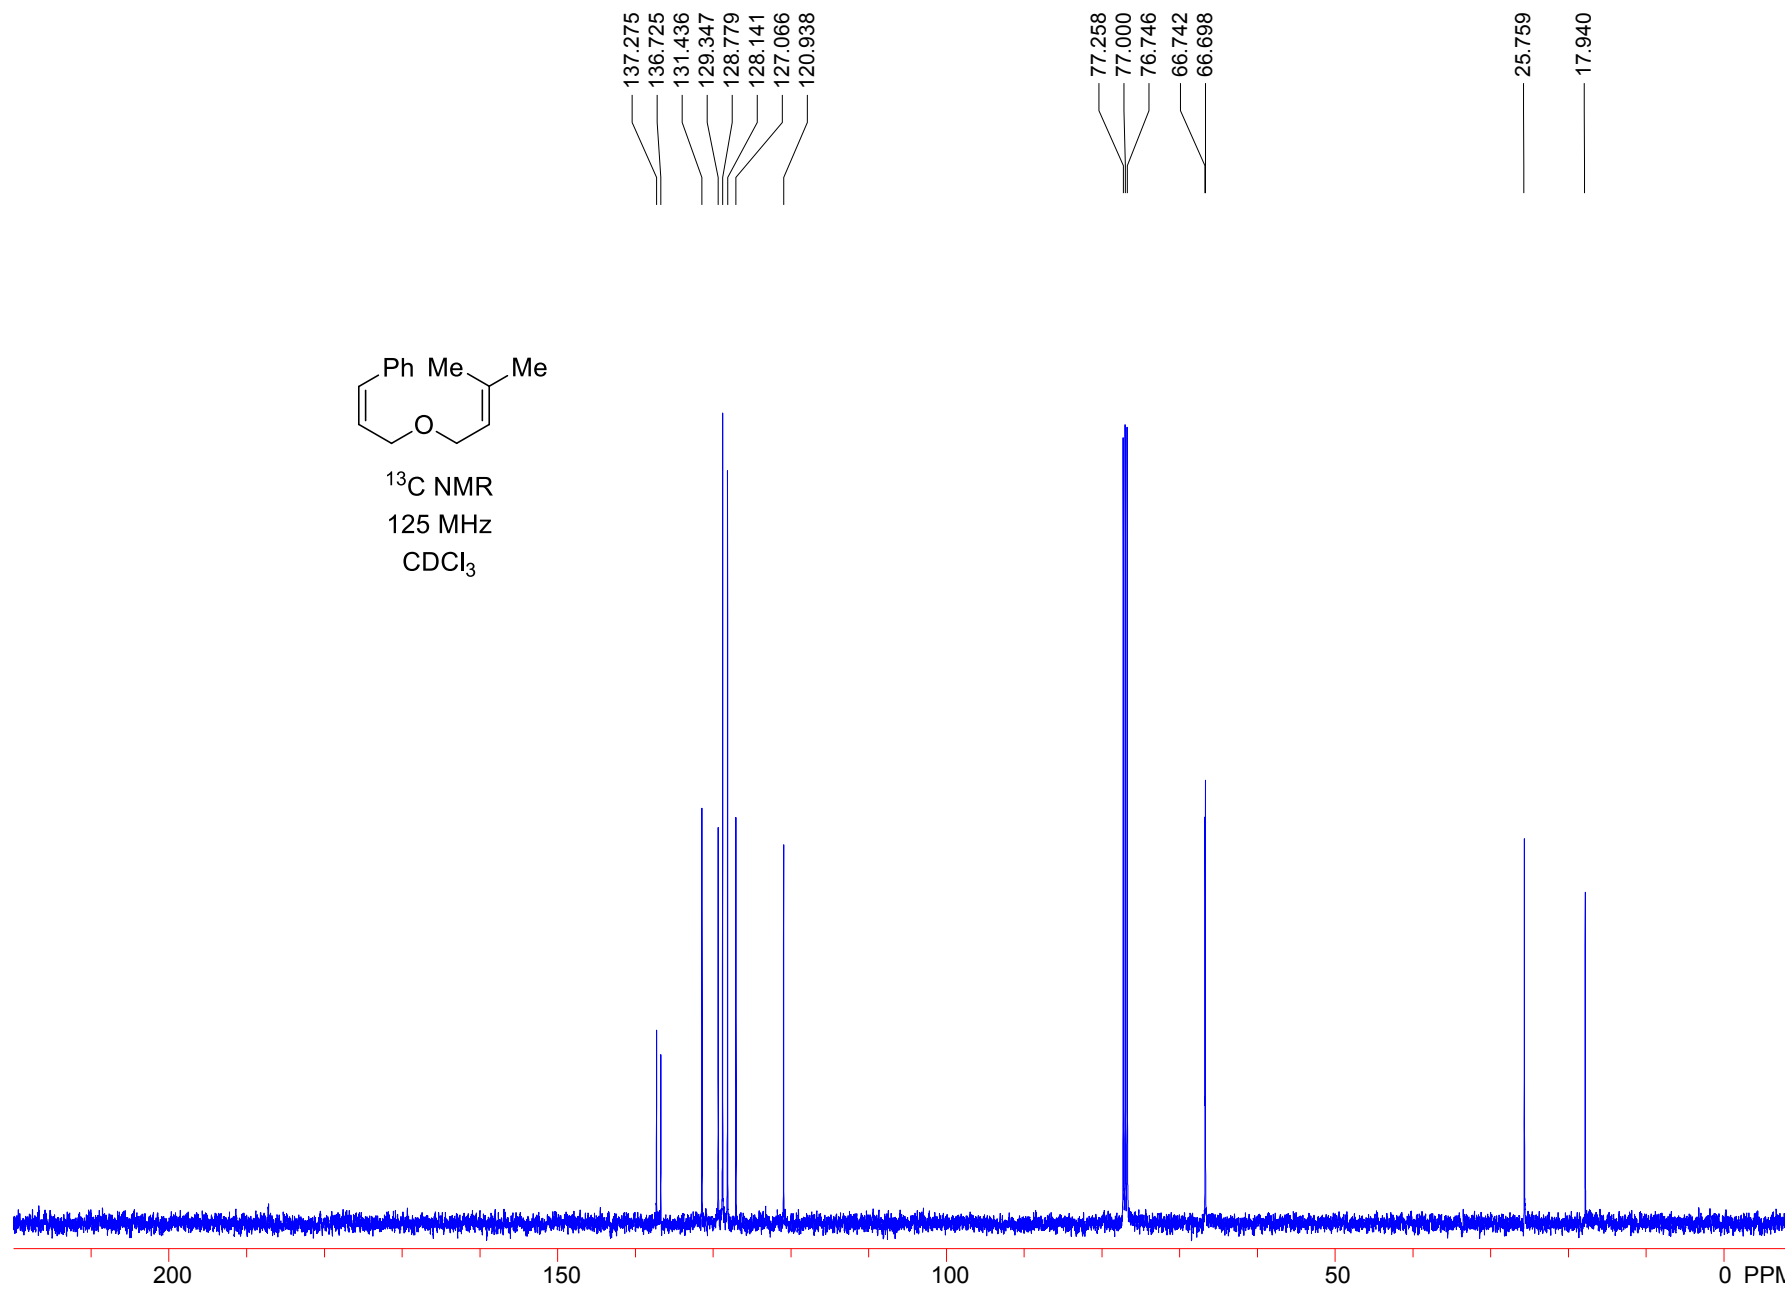

7.335  
7.330  
7.326  
7.316  
7.312  
7.306  
7.258  
6.862  
6.856  
6.852  
6.843  
6.839  
6.833  
6.562  
6.530  
6.202  
6.190  
6.177  
6.171  
6.158  
6.146  
5.407  
5.404  
5.402  
5.393  
5.390  
5.388  
5.379  
5.377  
5.374  
4.117  
4.114  
4.104  
4.102  
4.014  
4.000  
3.803  
1.758  
1.686  
0.000

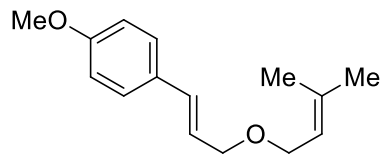

<sup>1</sup>H NMR  
500 MHz  
CDCl<sub>3</sub>

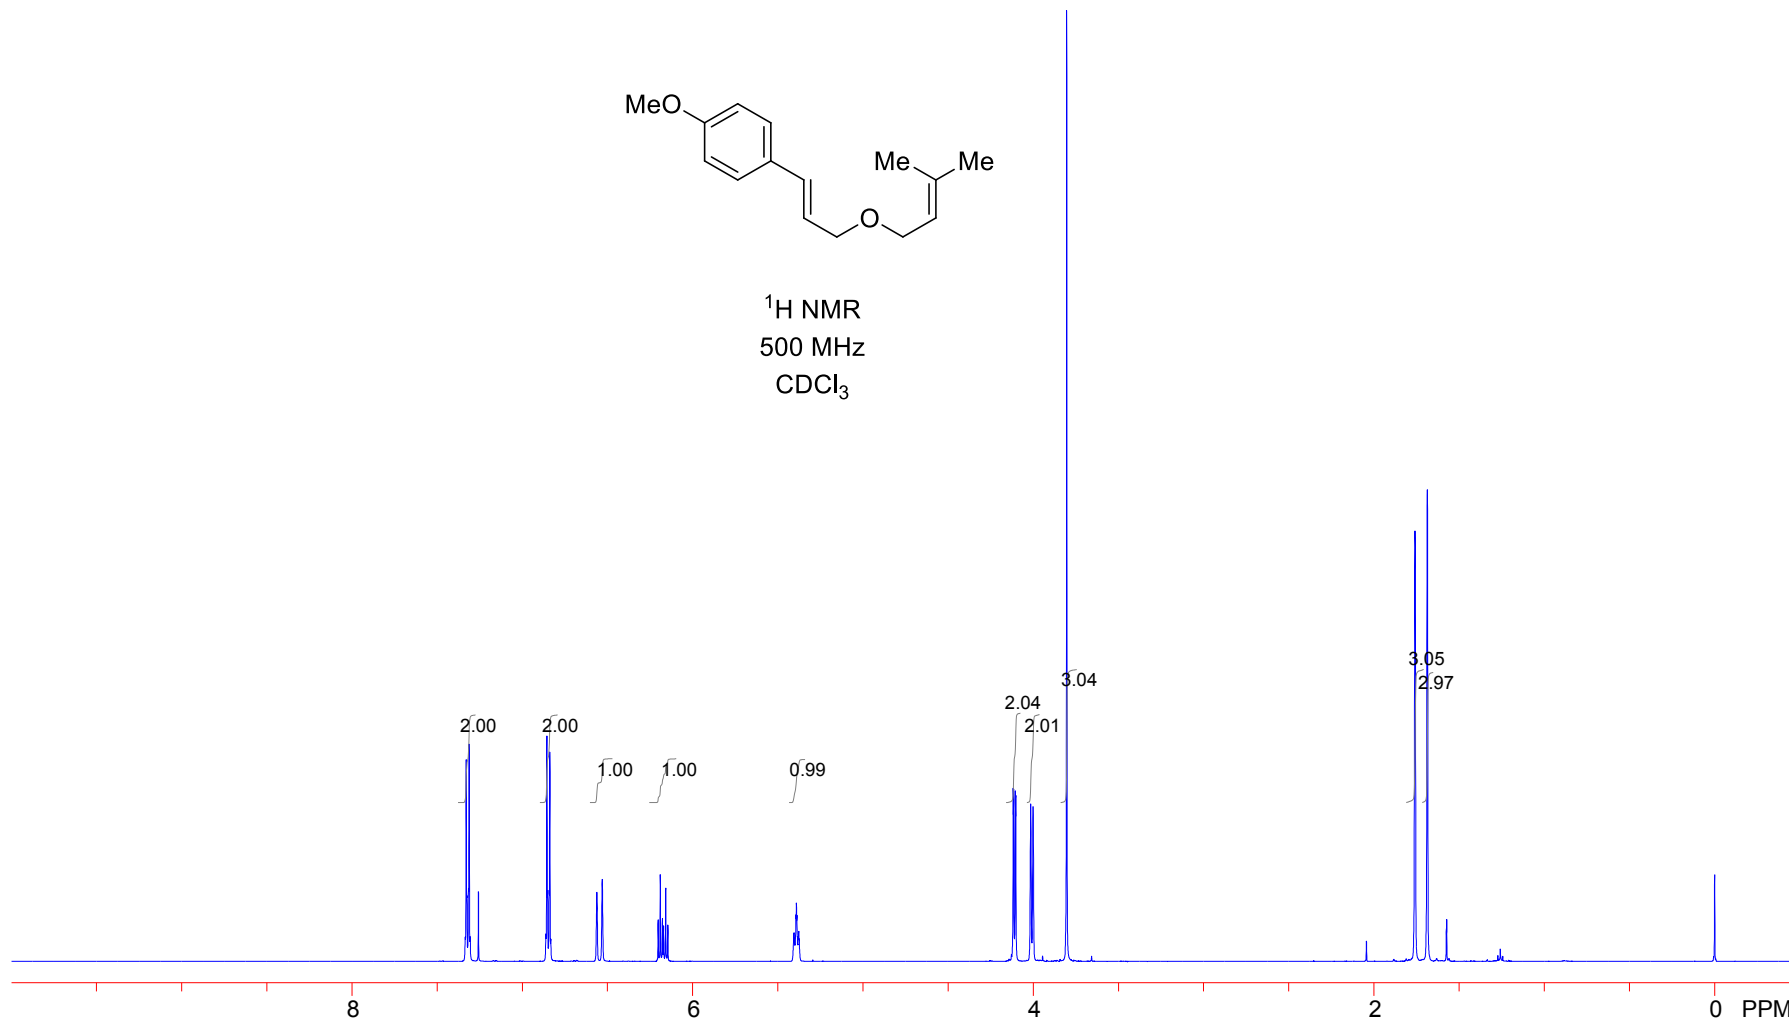

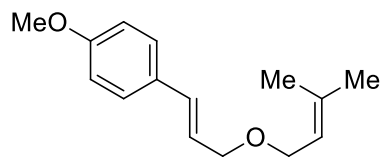

$^{13}\text{C}$  NMR  
125 MHz  
 $\text{CDCl}_3$

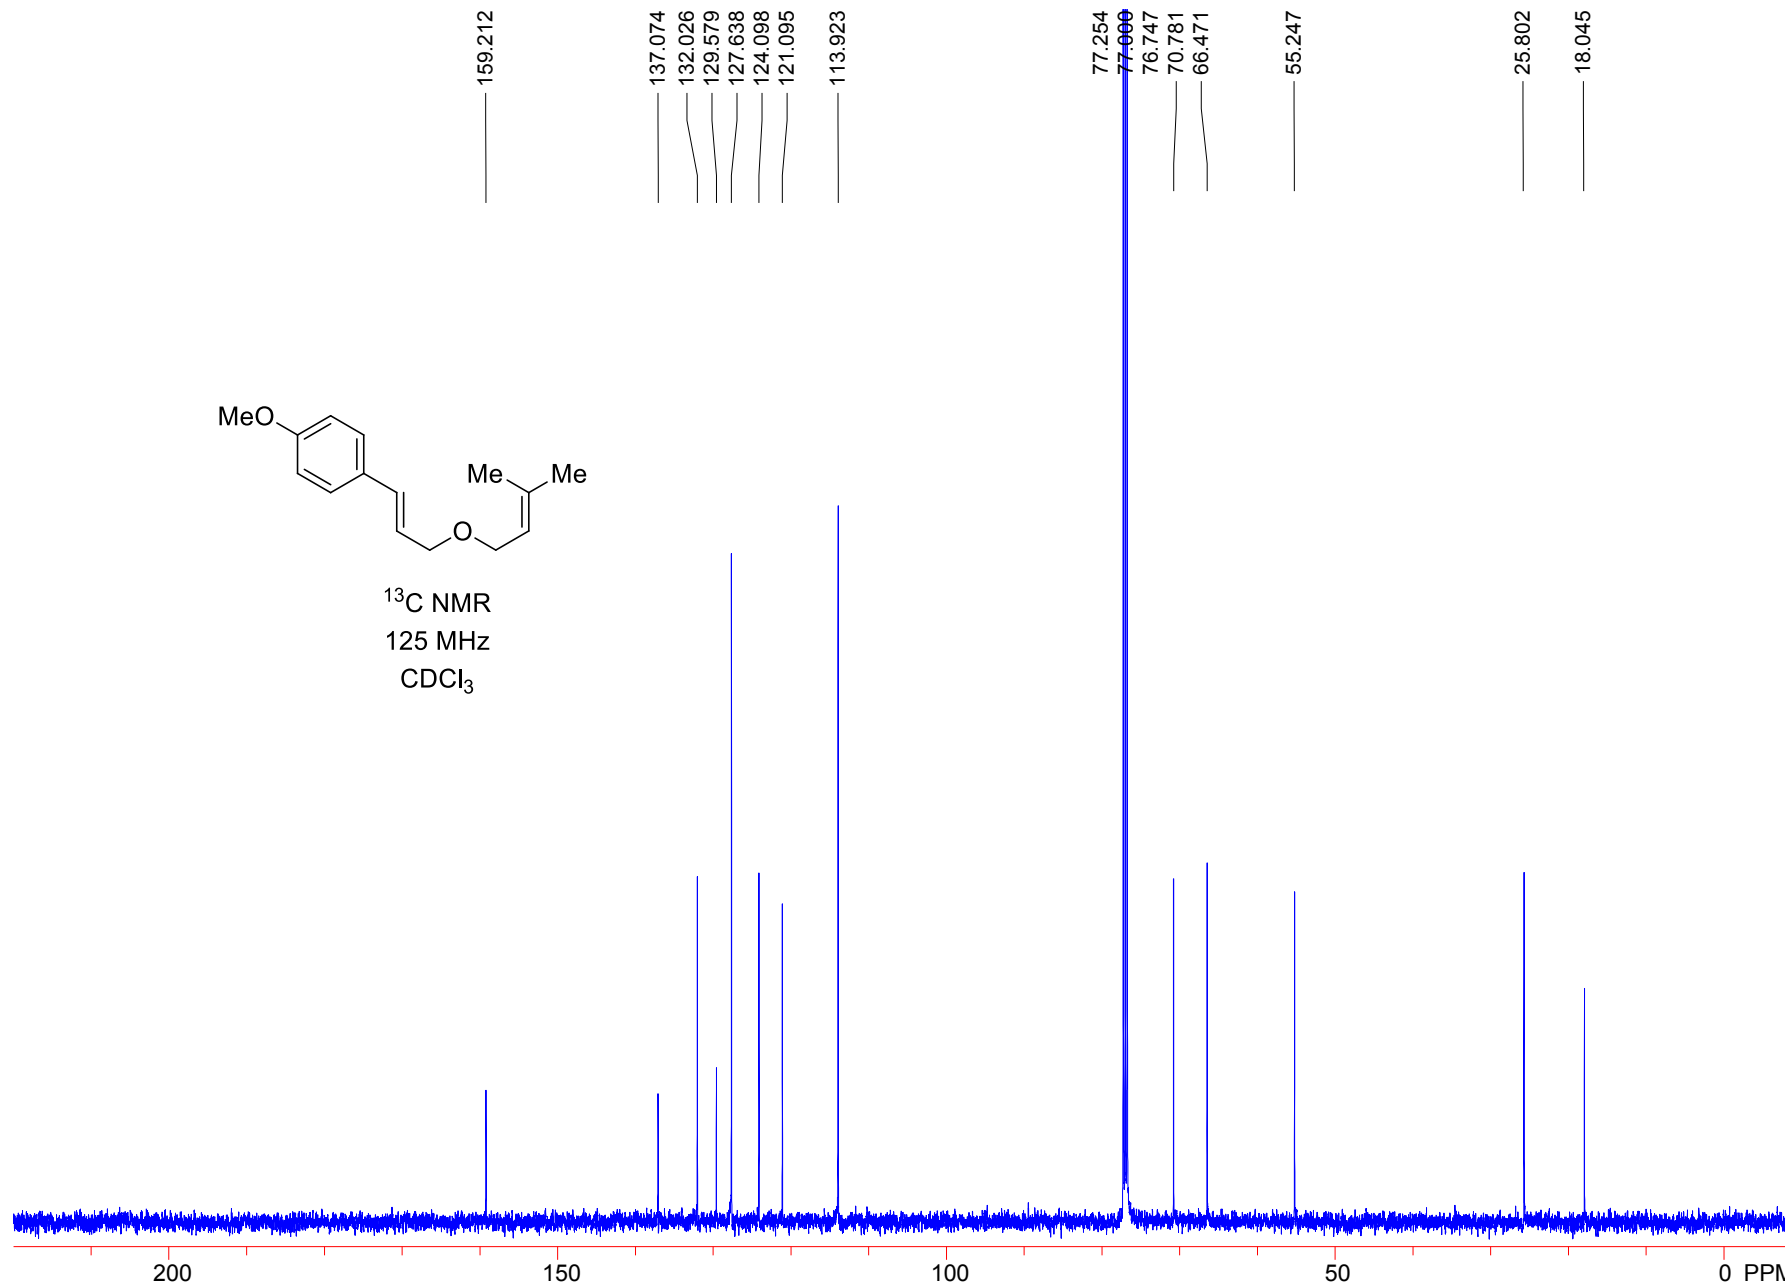



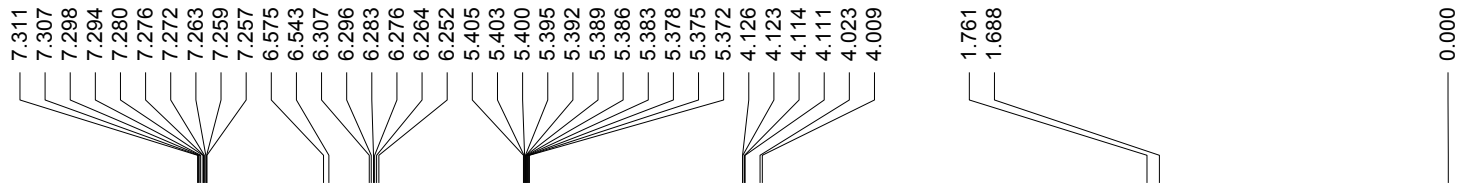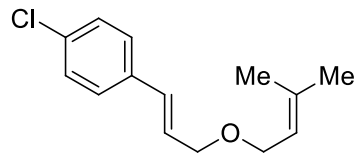

<sup>1</sup>H NMR  
500 MHz  
CDCl<sub>3</sub>

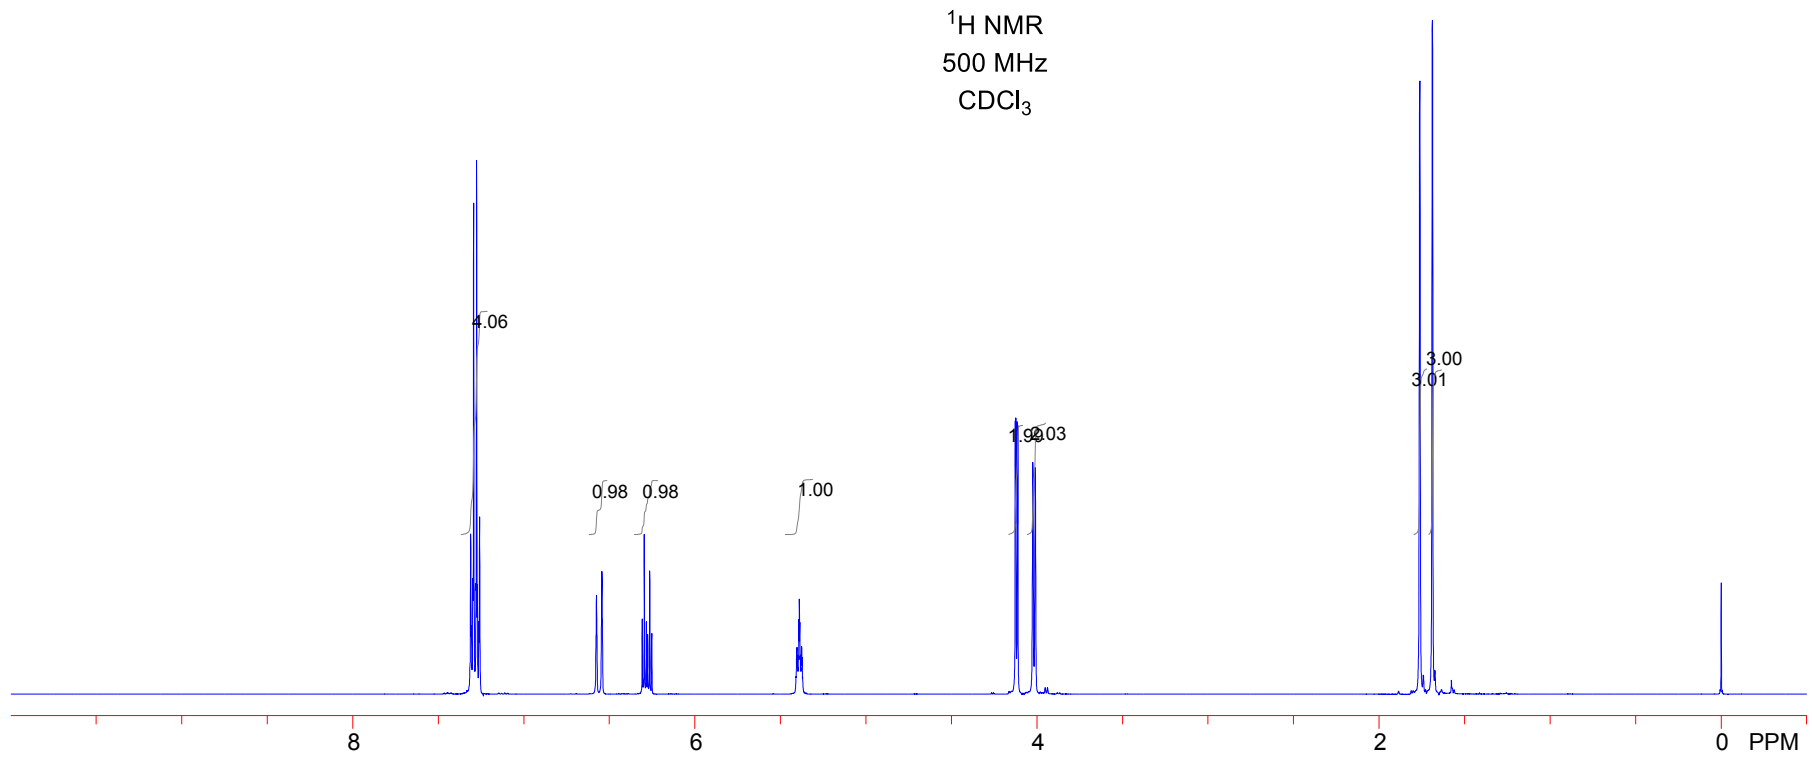

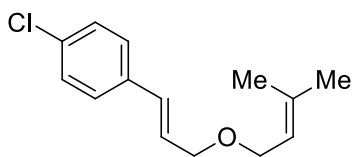

$^{13}\text{C}$  NMR  
125 MHz  
 $\text{CDCl}_3$

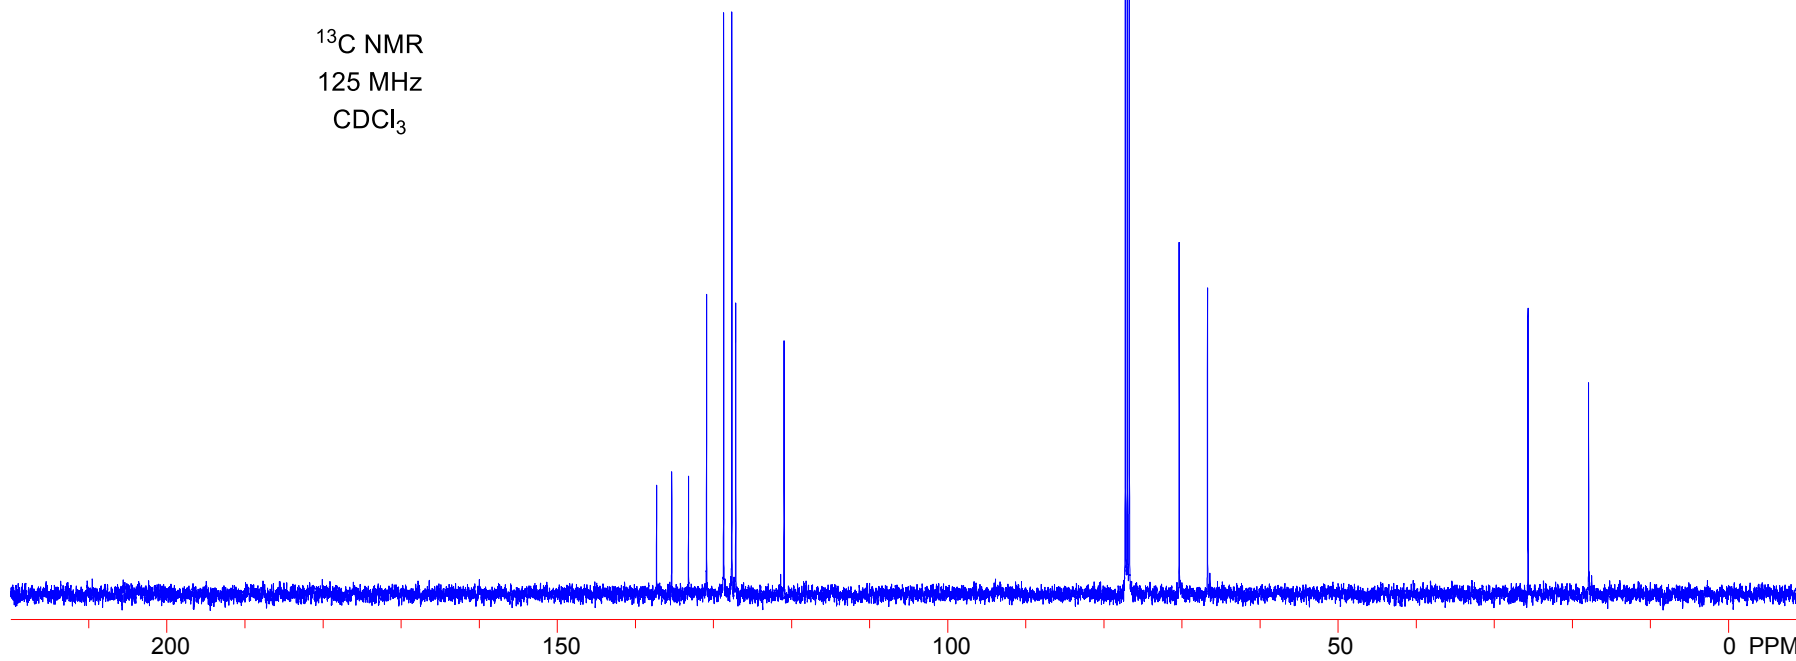

137.275  
135.339  
133.189  
130.877  
128.687  
127.638  
127.140  
120.955

77.253  
77.000  
76.746  
70.352  
66.738

25.772  
18.018

8.187  
8.183  
8.179  
8.169  
8.165  
8.160  
7.518  
7.513  
7.500  
7.496  
7.491  
7.268  
6.712  
6.679  
6.518  
6.508  
6.496  
6.487  
6.475  
6.465  
5.416  
5.414  
5.411  
5.405  
5.403  
5.400  
5.397  
5.394  
5.388  
5.386  
5.383  
4.185  
4.182  
4.174  
4.171  
4.057  
4.043

1.775  
1.703

0.000

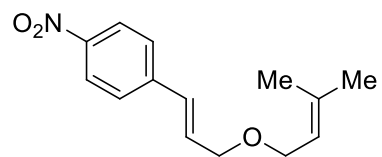

<sup>1</sup>H NMR  
500 MHz  
CDCl<sub>3</sub>

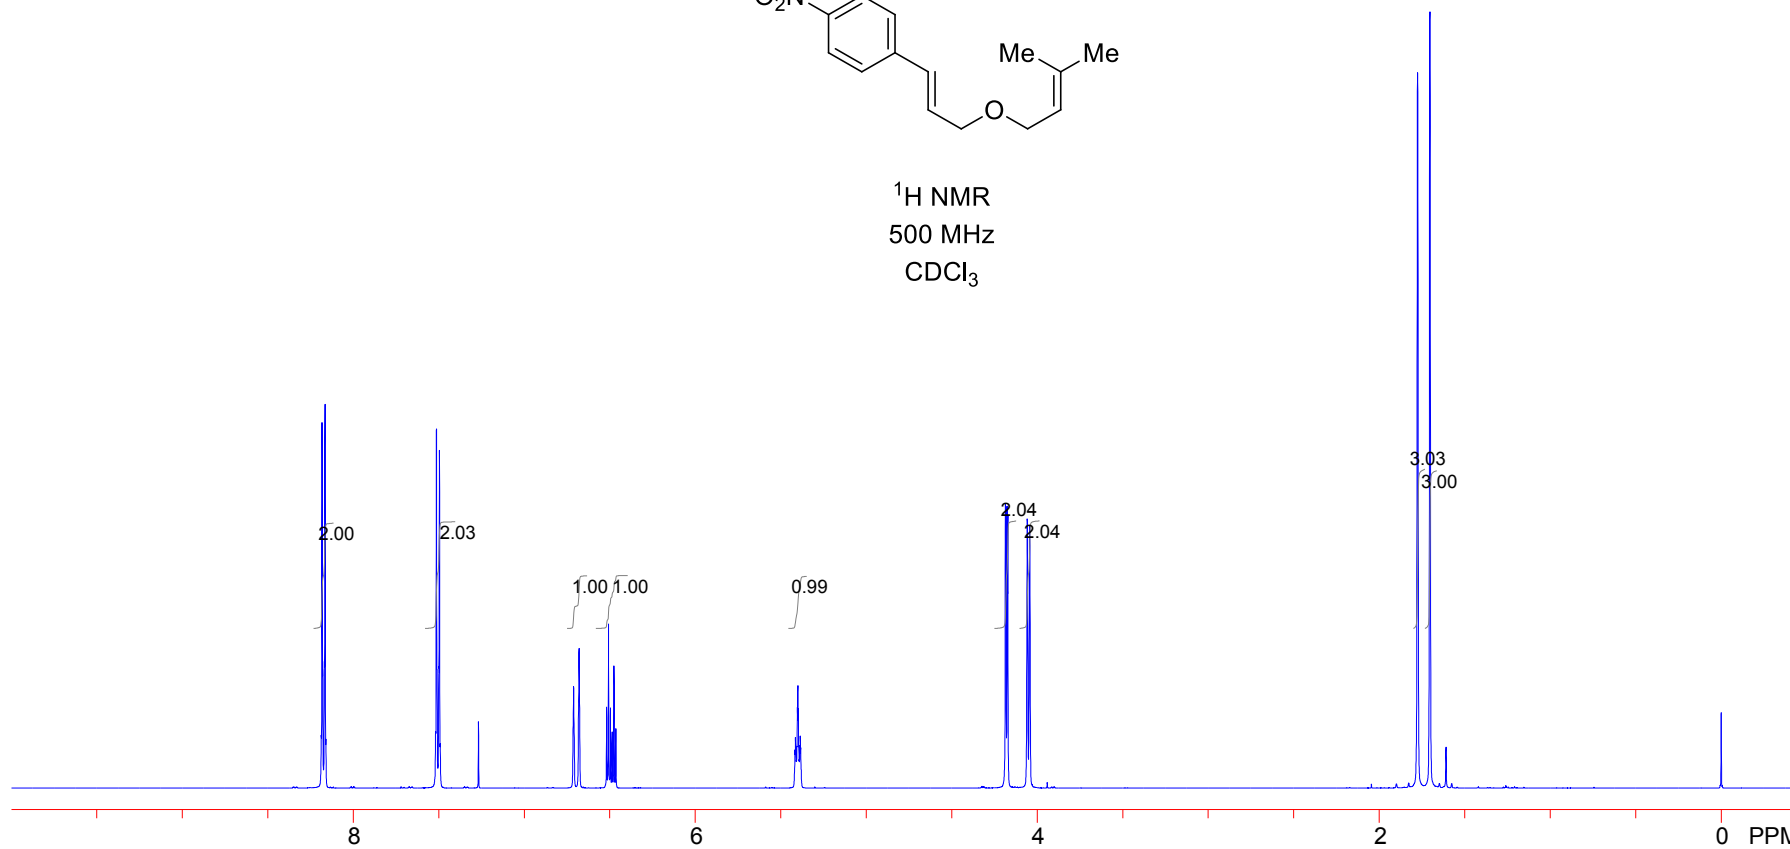

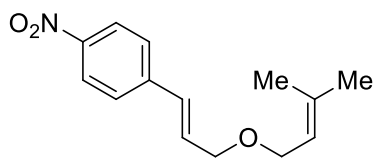

<sup>13</sup>C NMR  
125 MHz  
CDCl<sub>3</sub>

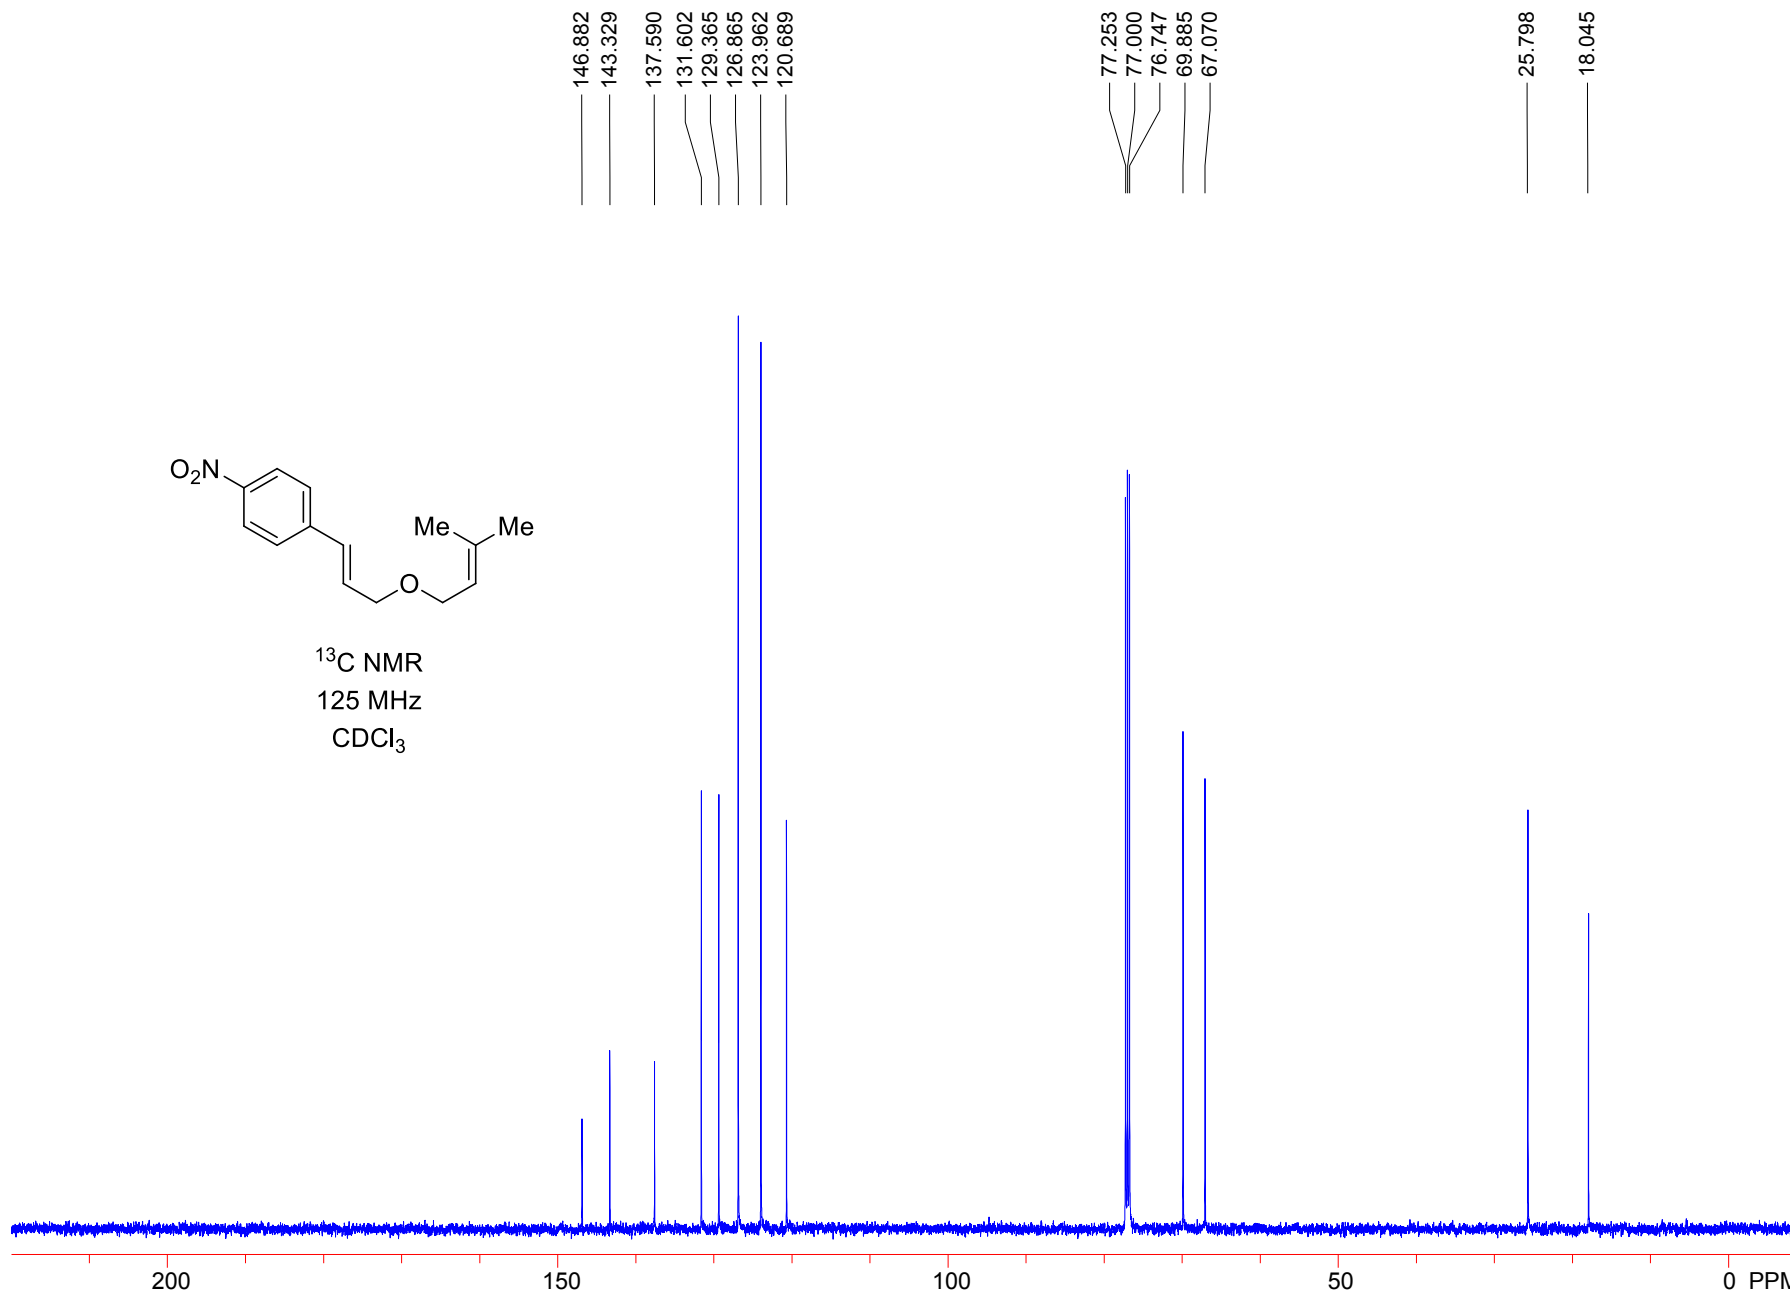

8.554  
8.553  
8.545  
8.543

7.630  
7.628  
7.626  
7.615  
7.613  
7.599  
7.597  
7.595  
7.303  
7.287  
7.128  
7.127  
7.118  
7.117  
7.114  
7.104  
6.806  
6.785  
6.775  
6.764  
6.732  
6.700  
5.413  
5.402  
5.400  
5.397  
5.385  
4.203  
4.200  
4.193  
4.190  
4.051  
4.037

1.761  
1.690

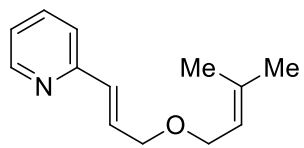

<sup>1</sup>H NMR  
500 MHz  
CDCl<sub>3</sub>

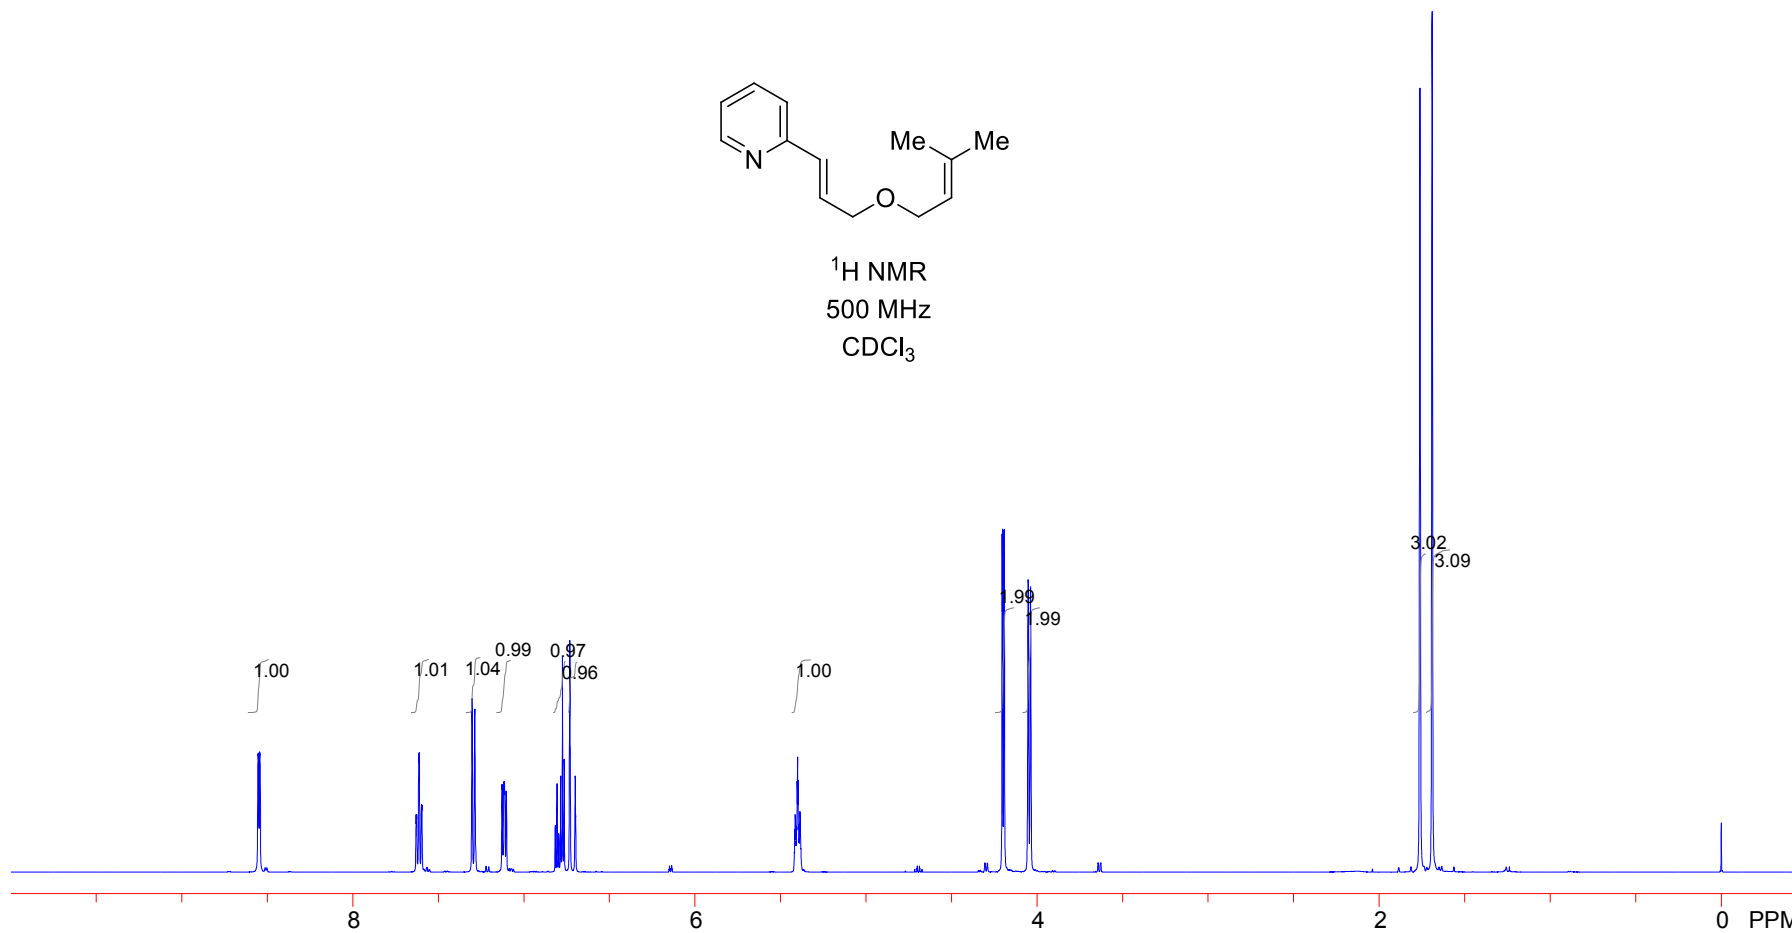

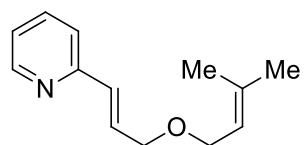

<sup>13</sup>C NMR  
125 MHz  
CDCl<sub>3</sub>

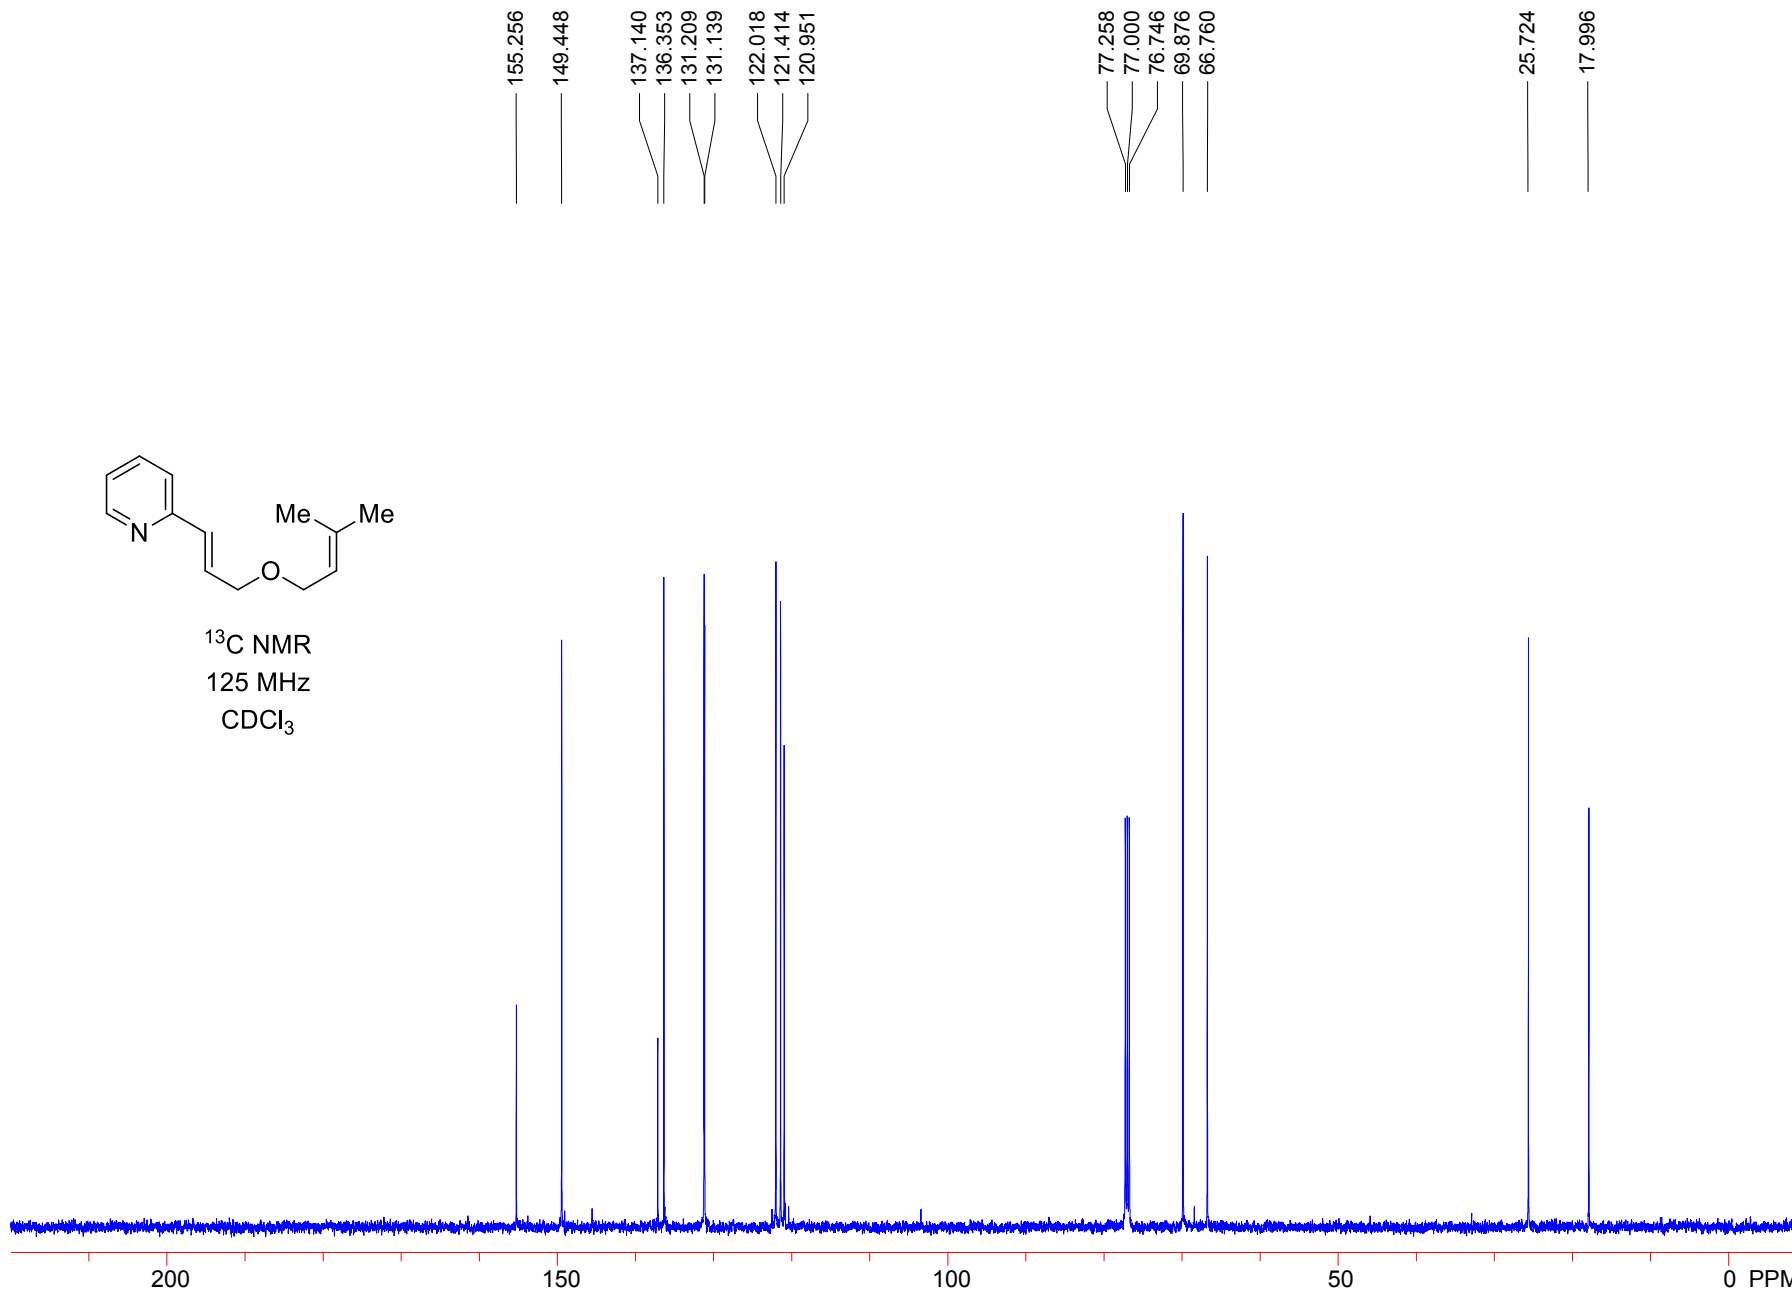

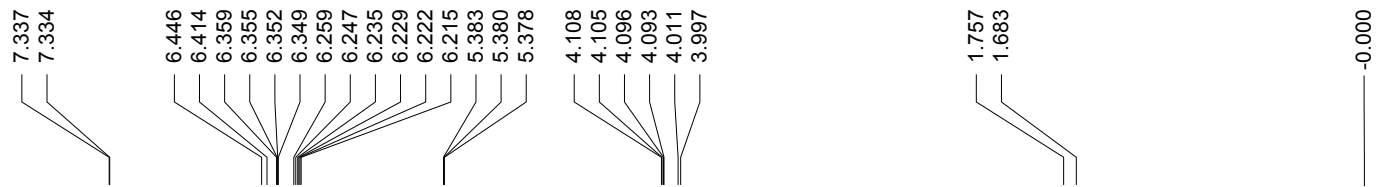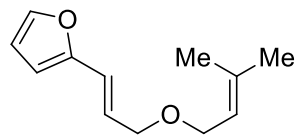

<sup>1</sup>H NMR  
500 MHz  
CDCl<sub>3</sub>

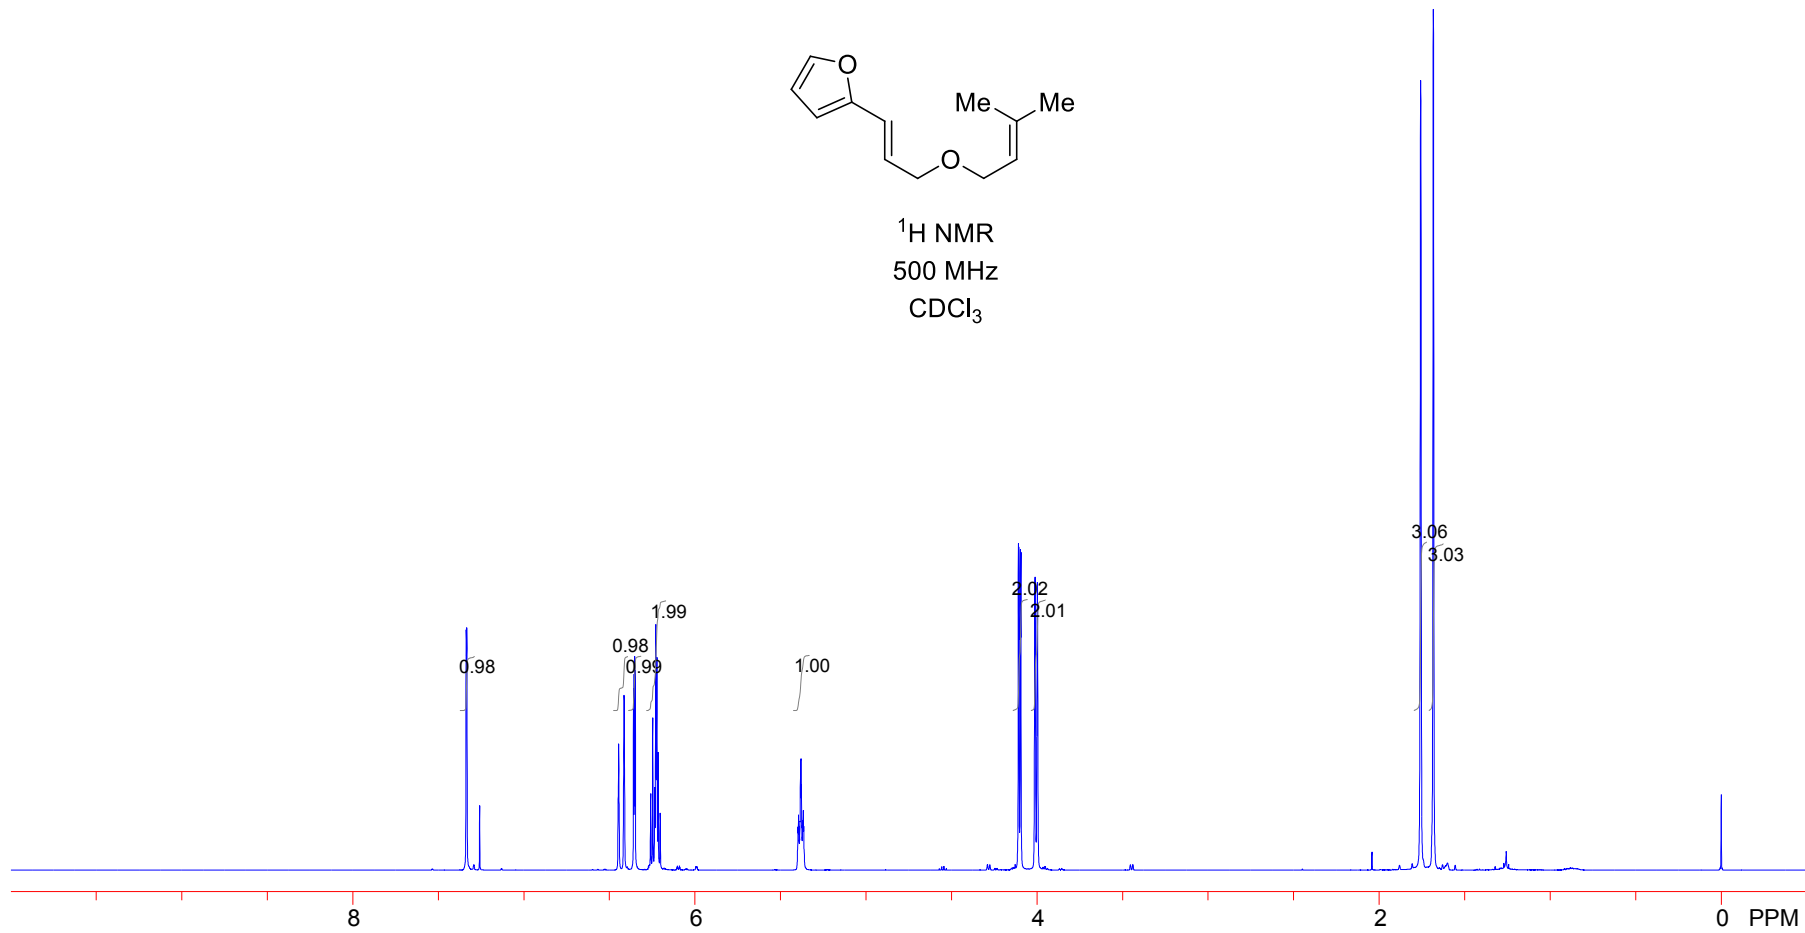

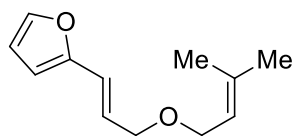

$^{13}\text{C}$  NMR  
125 MHz  
 $\text{CDCl}_3$

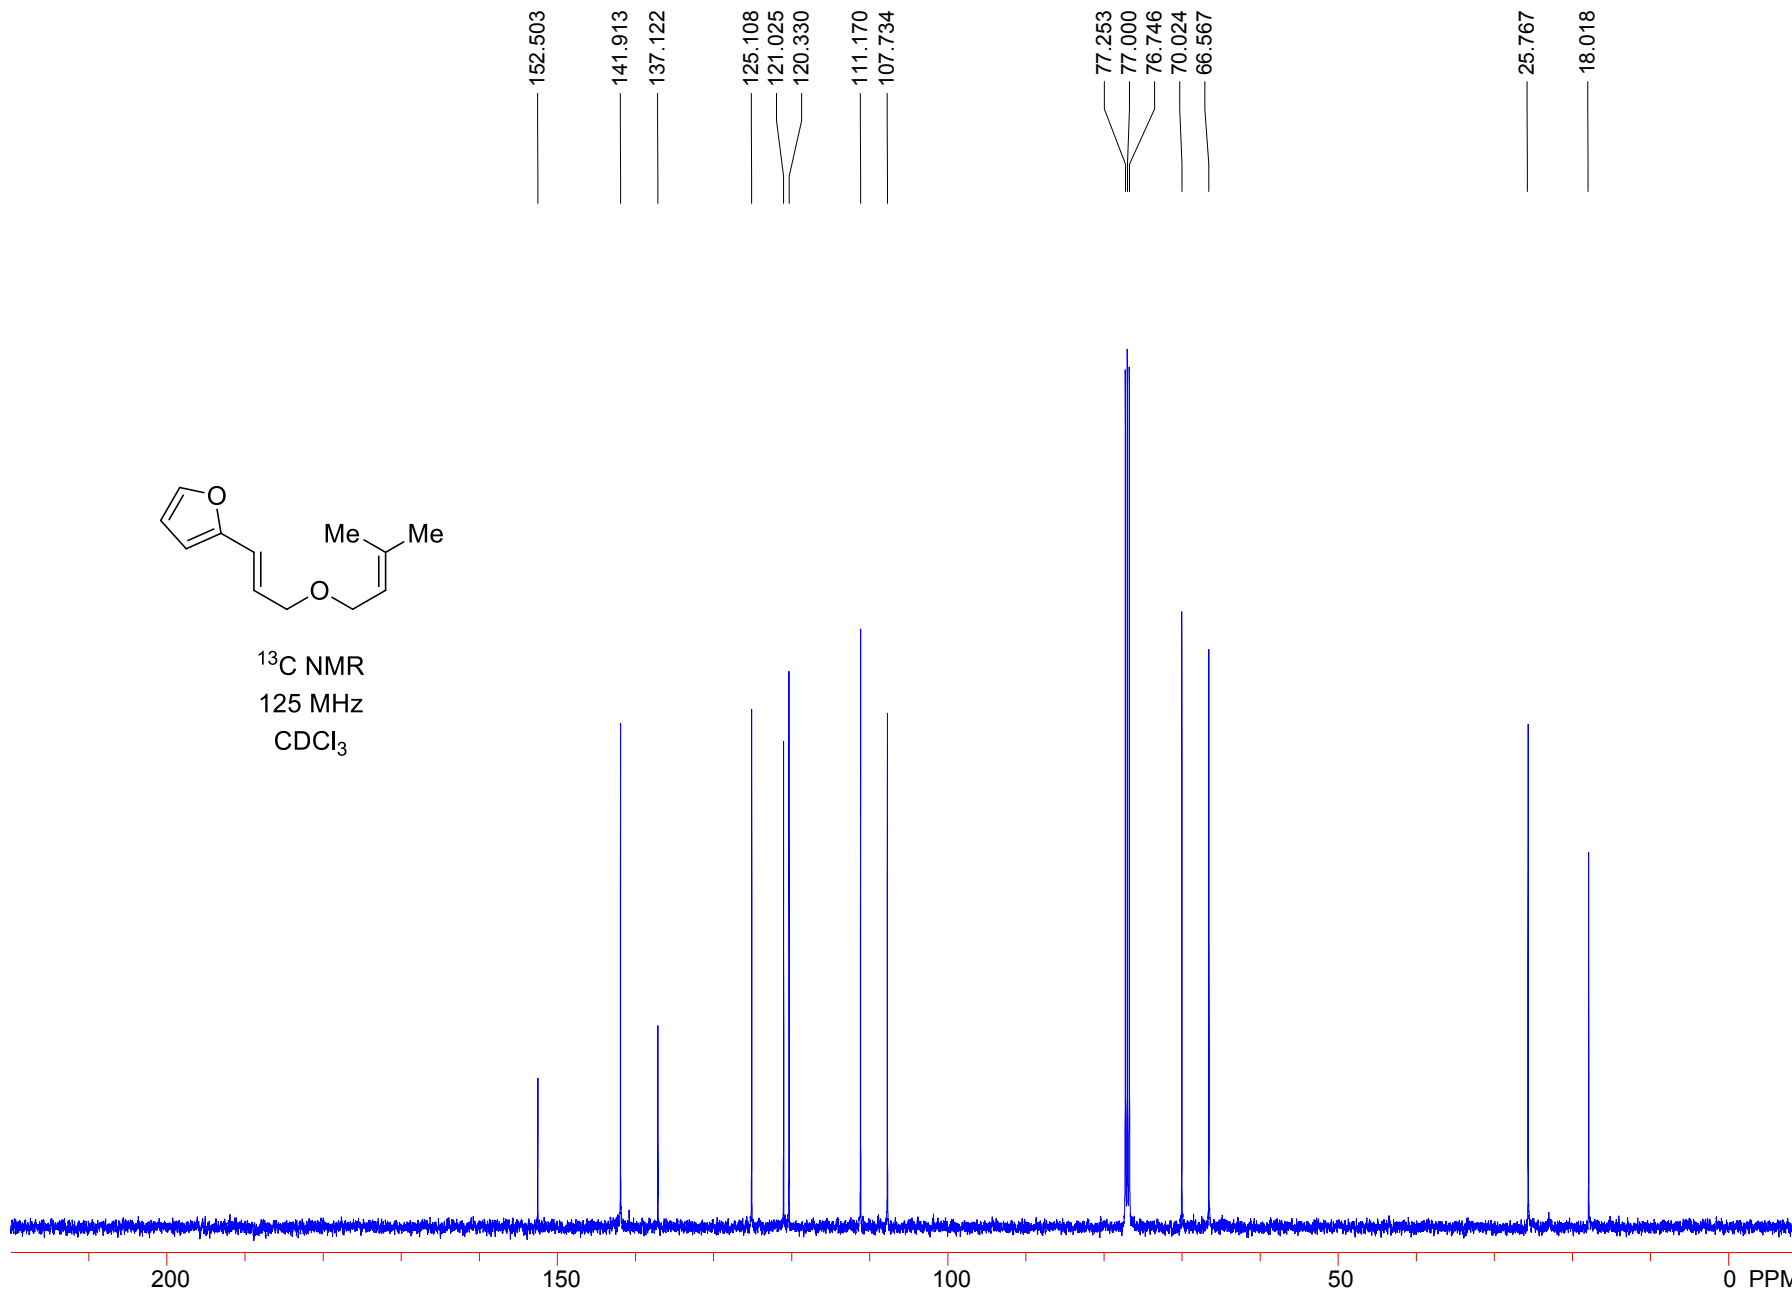



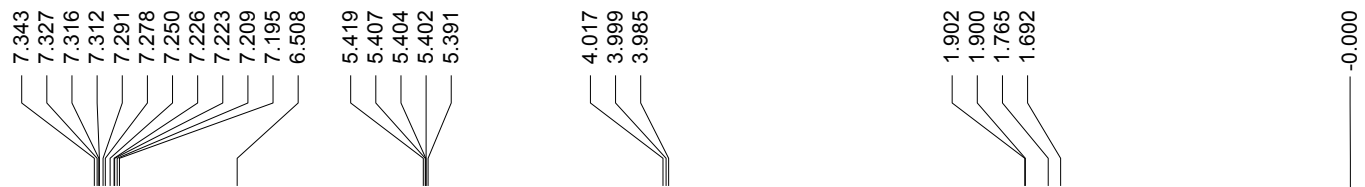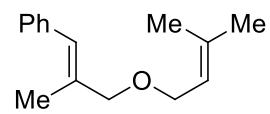

<sup>1</sup>H NMR  
500 MHz  
CDCl<sub>3</sub>

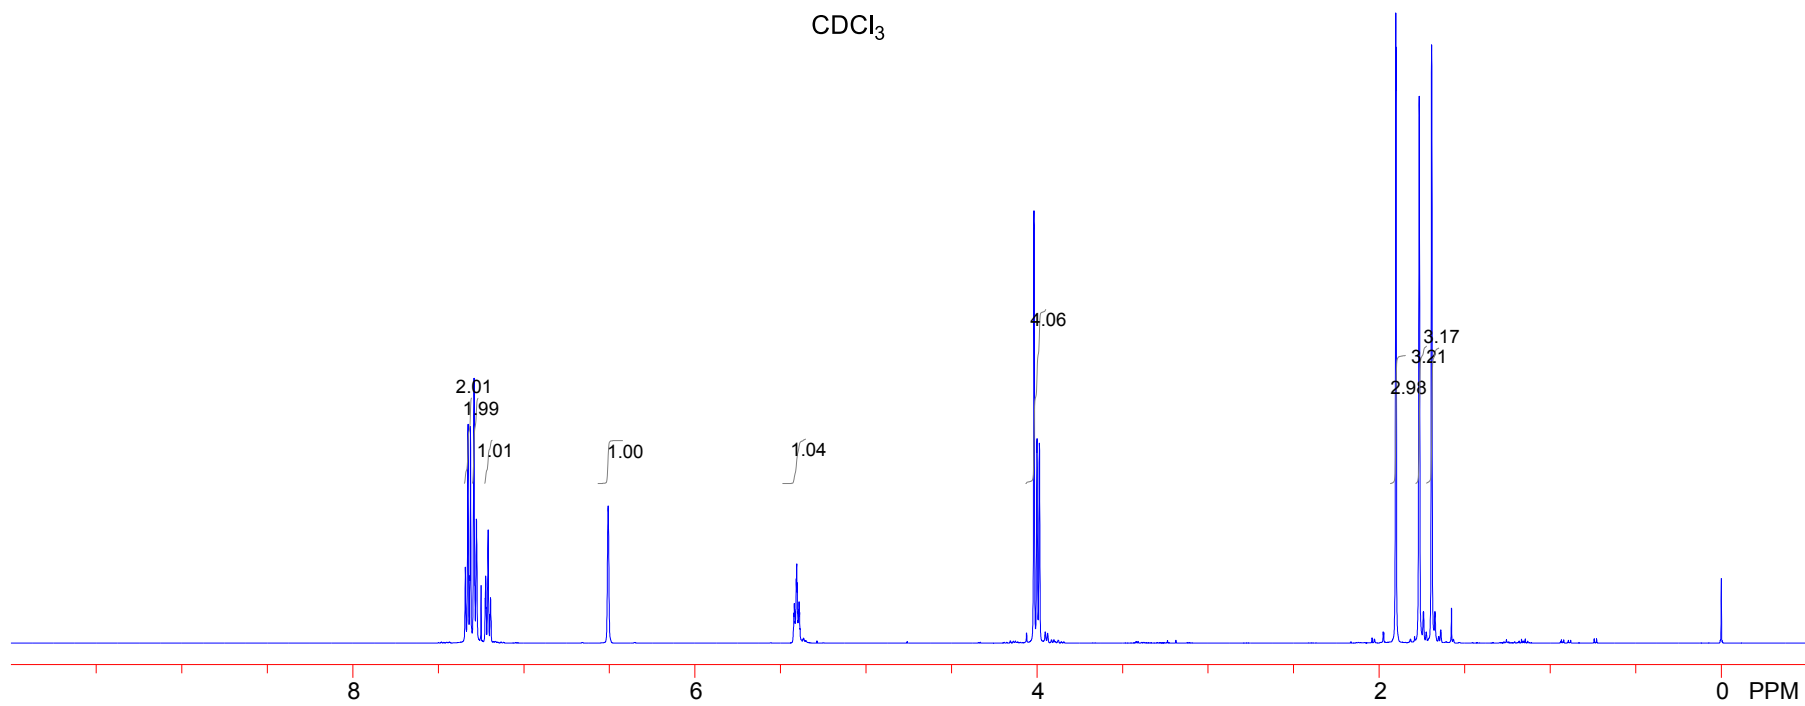

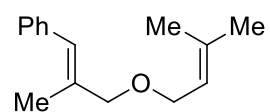

<sup>13</sup>C NMR  
125 MHz  
CDCl<sub>3</sub>

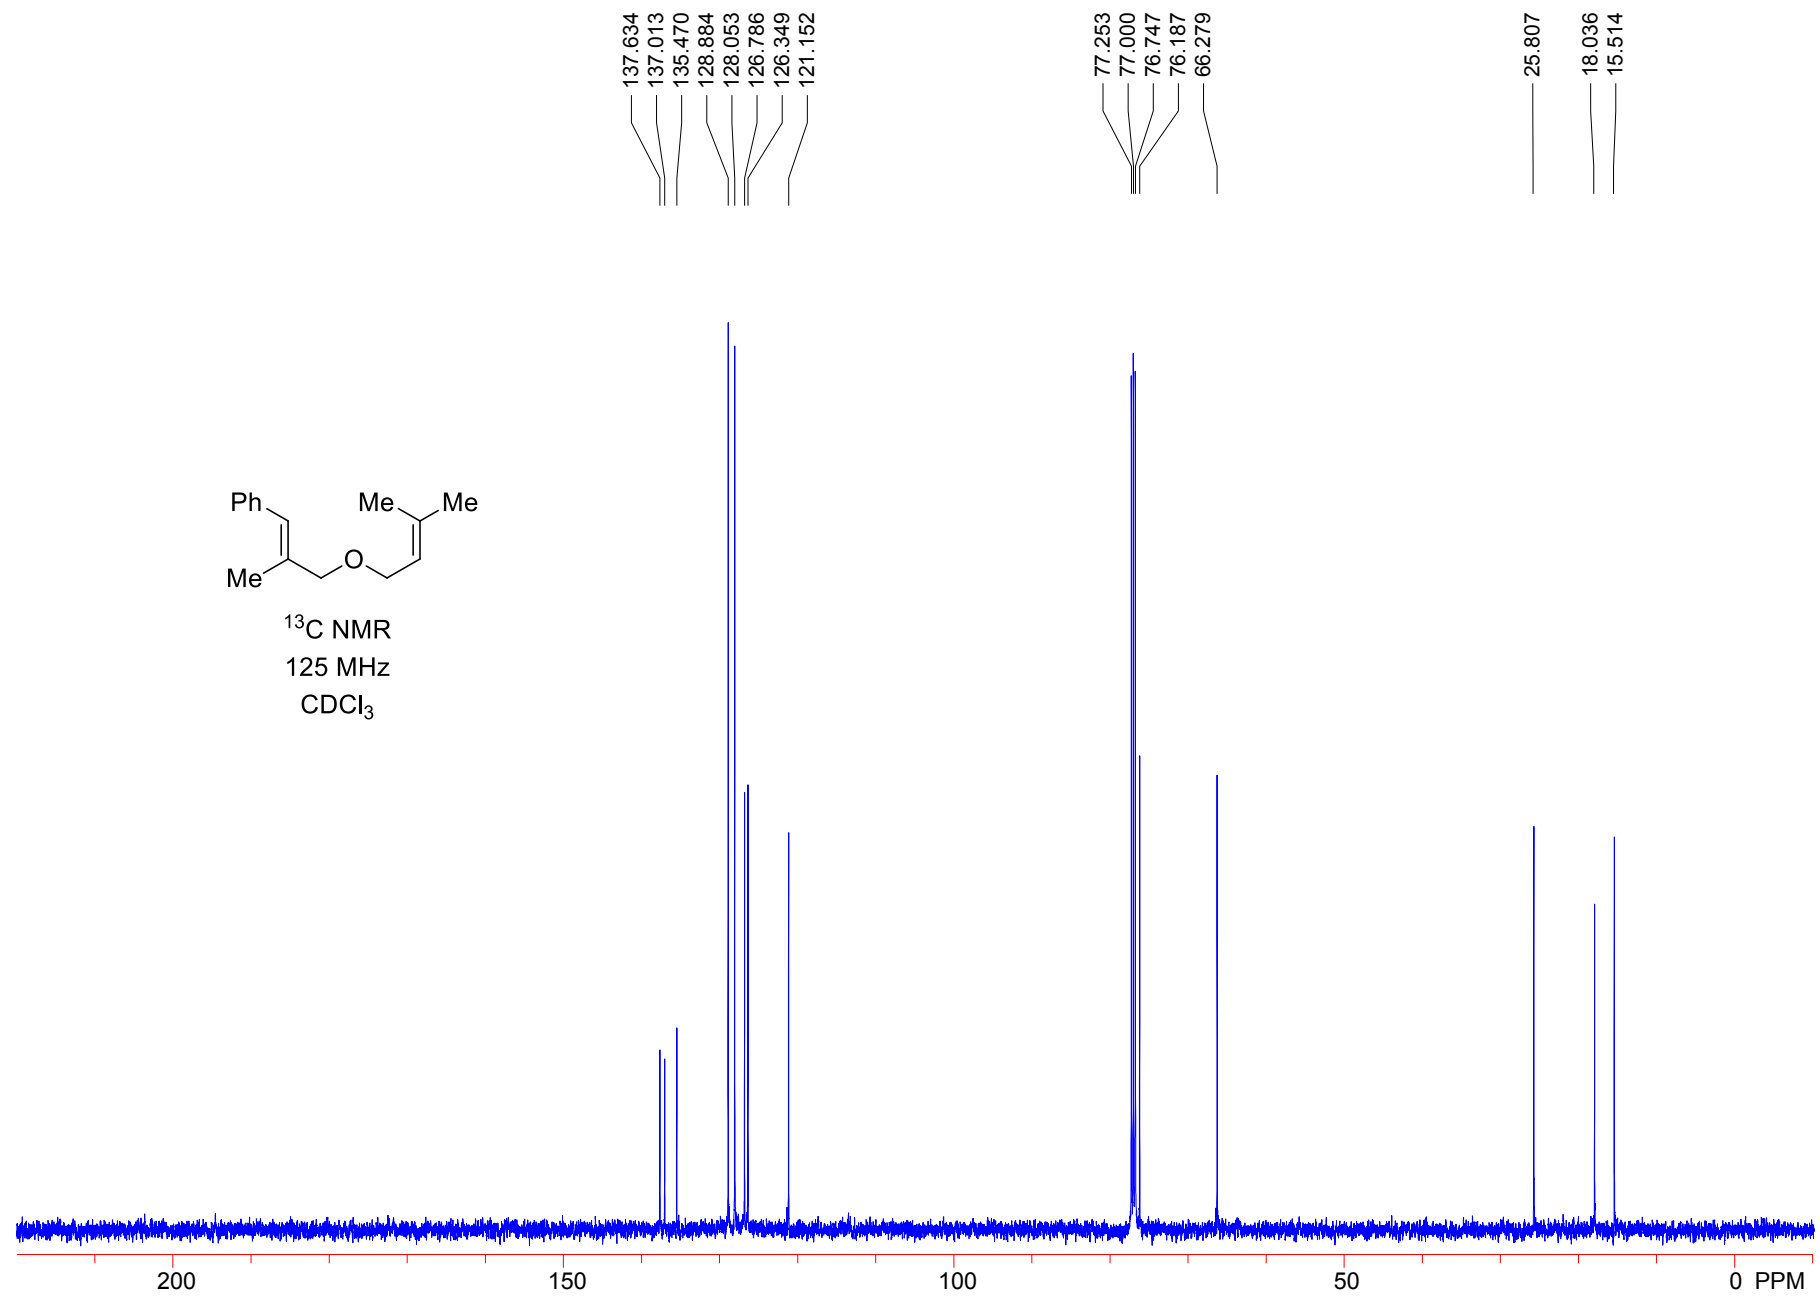

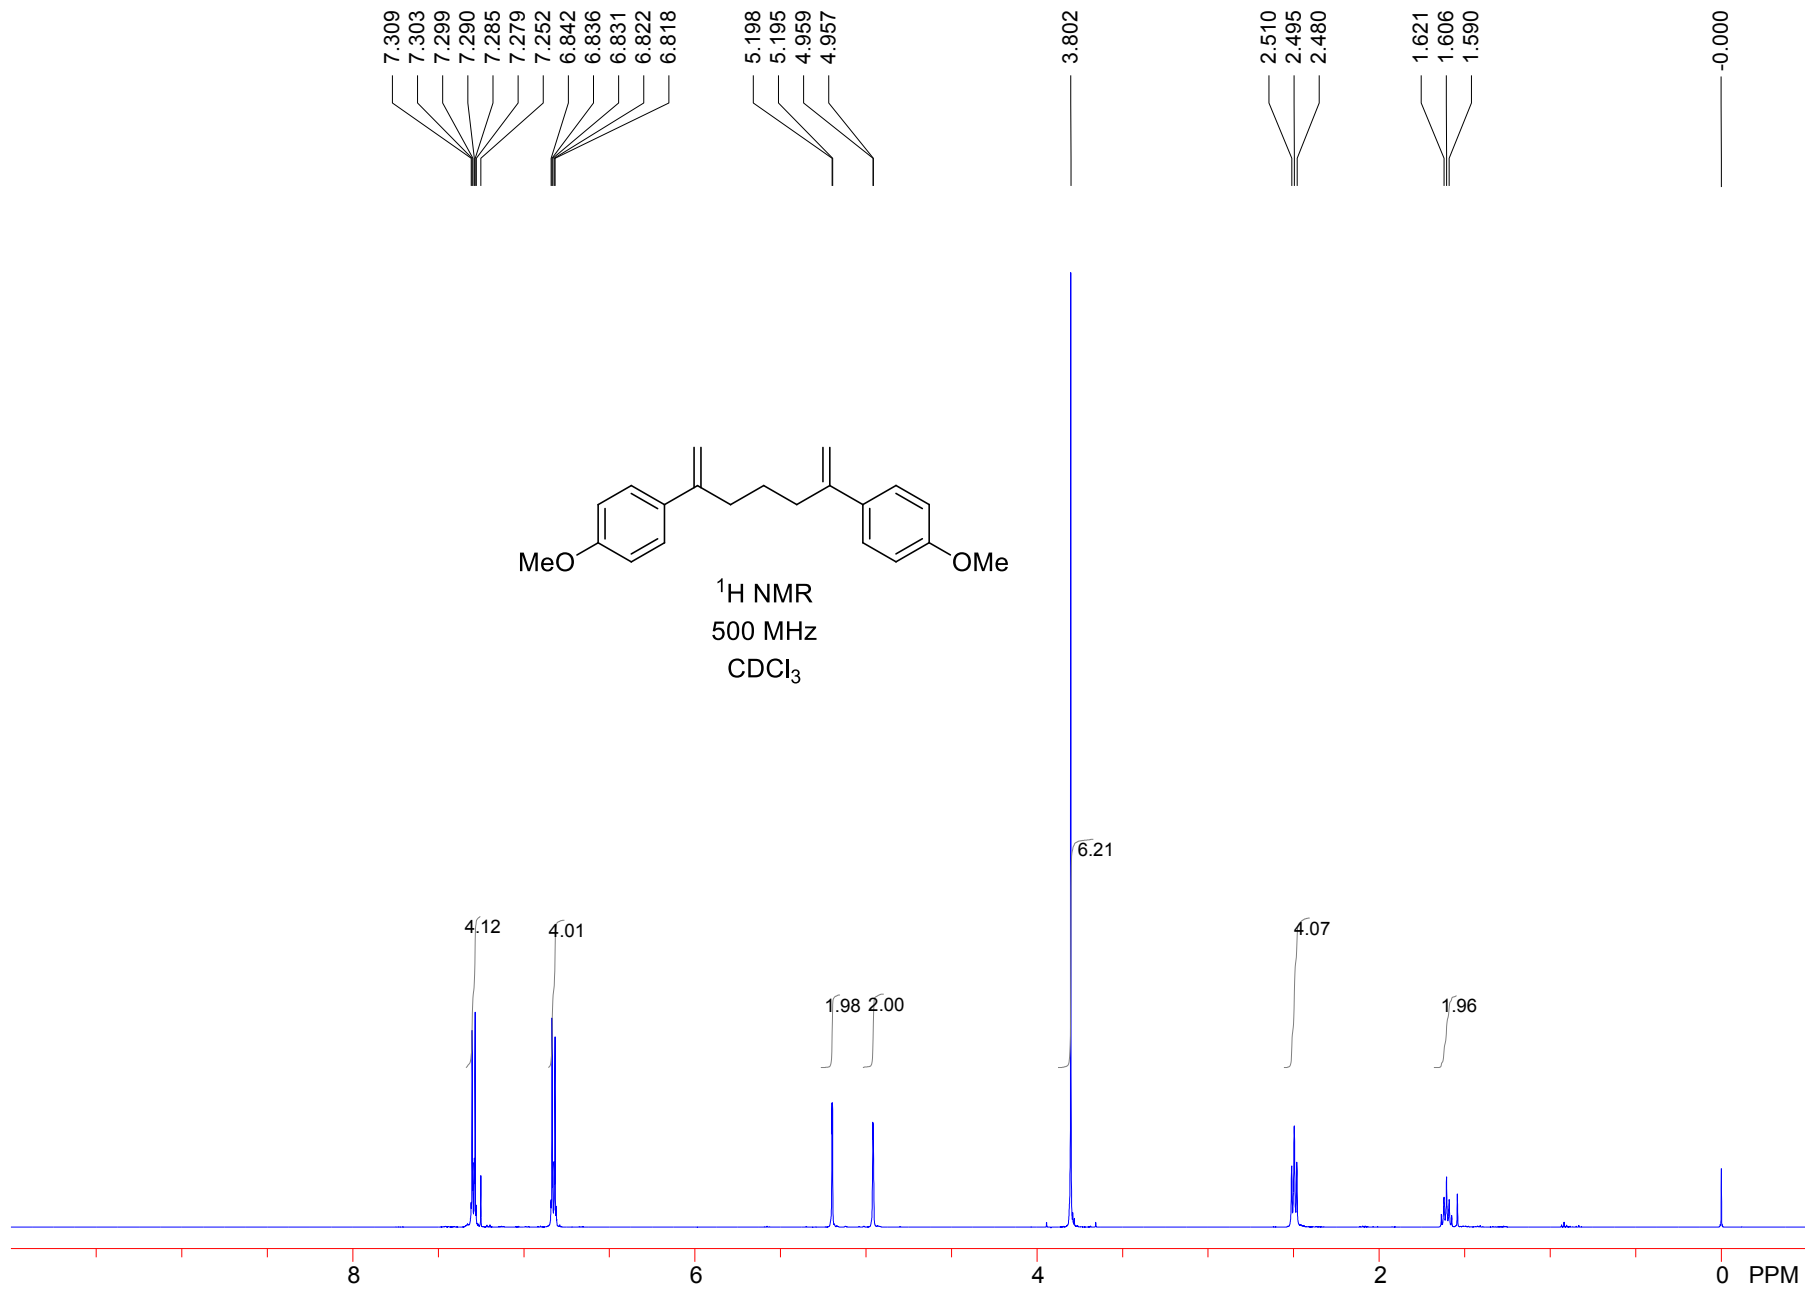

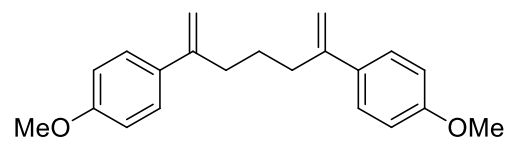

$^{13}\text{C}$  NMR  
125 MHz  
 $\text{CDCl}_3$

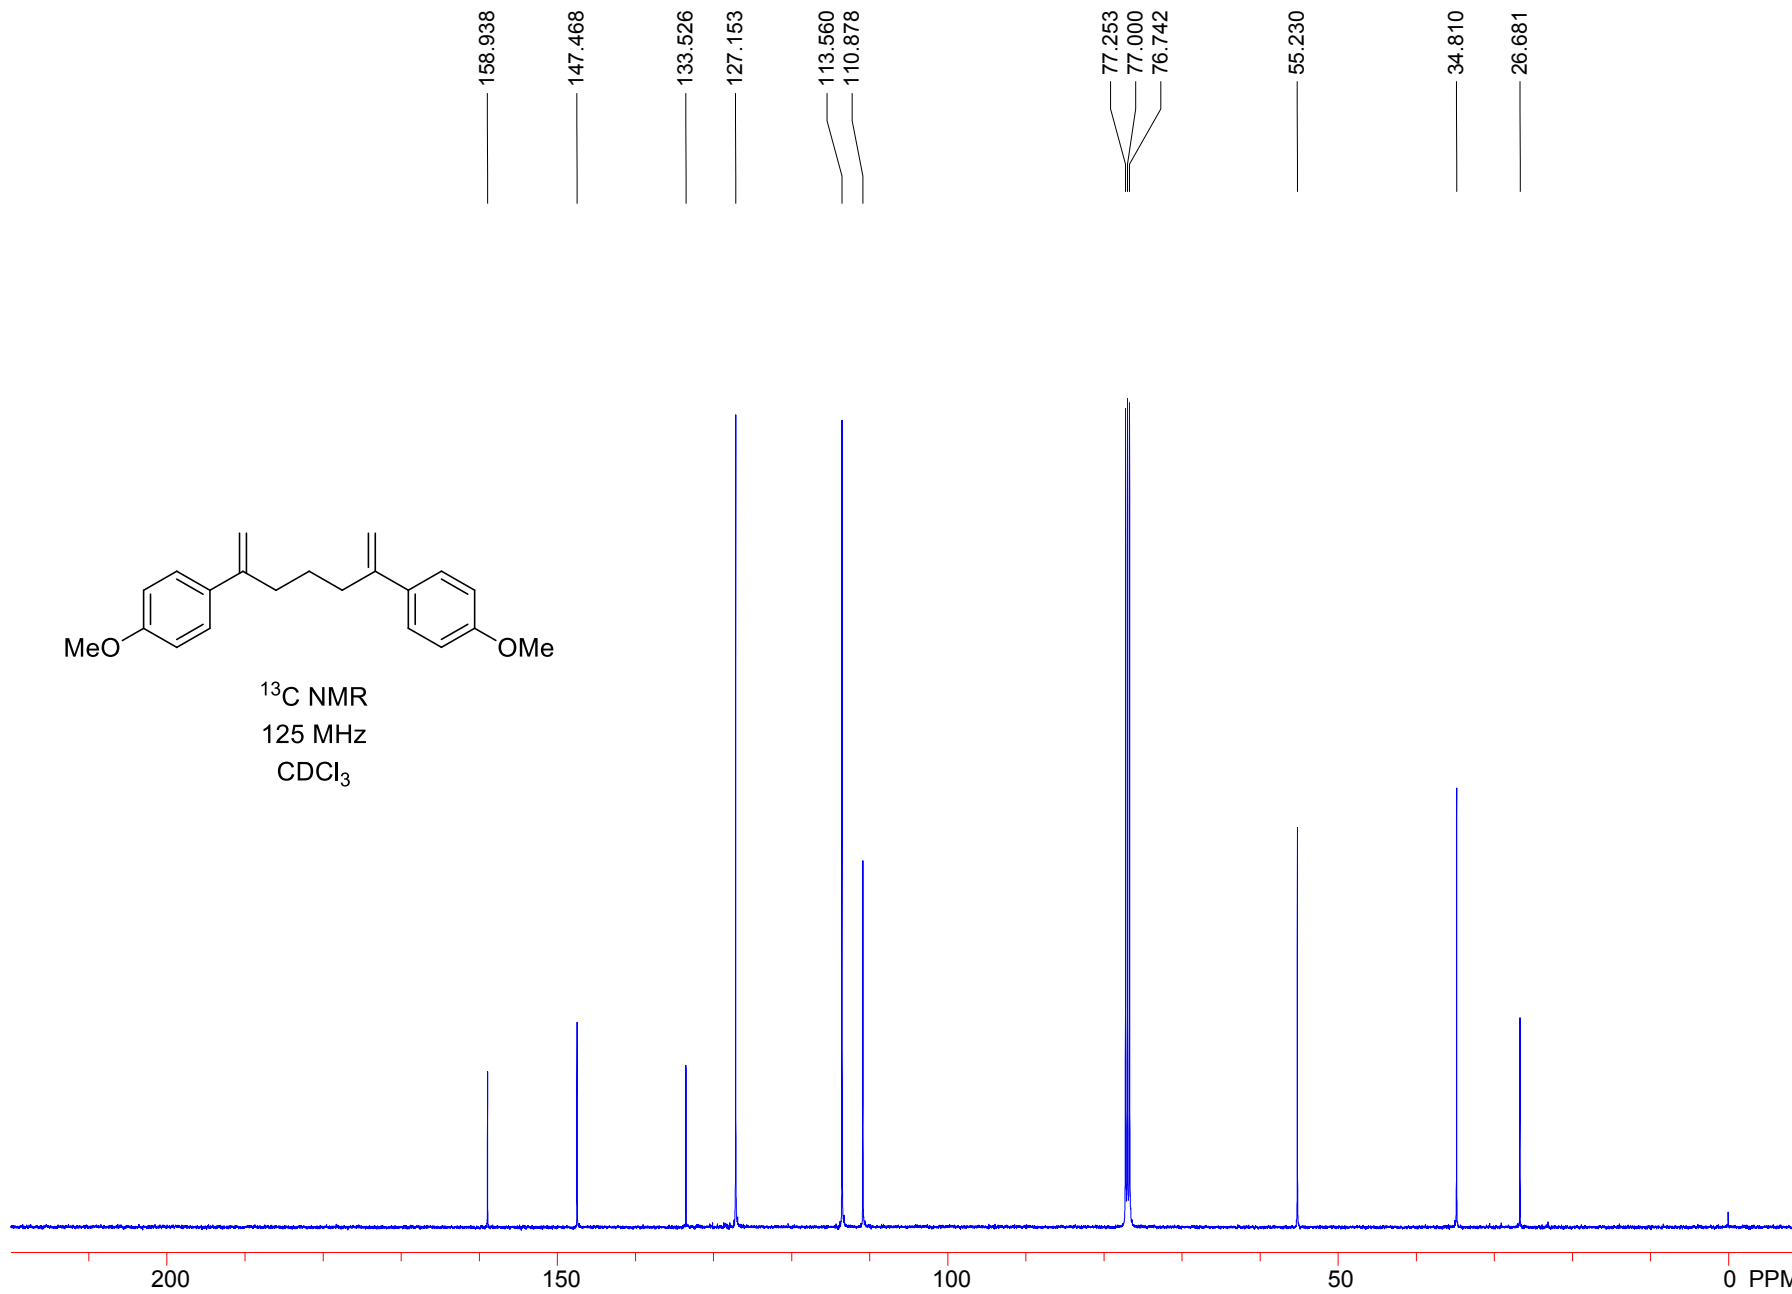

7.342  
7.339  
7.326  
7.315  
7.311  
7.255  
7.241  
7.235  
7.220  
7.205  
6.975  
6.961  
6.947  
6.944  
6.930  
6.916  
6.461  
6.438  
5.812  
5.809  
5.805  
5.780  
5.777  
5.774  
5.653  
5.638  
5.630  
5.624  
5.615  
5.601  
3.713

2.384  
2.380  
2.369  
2.366  
2.355  
2.351  
2.340  
2.336  
2.246  
2.243  
2.232  
2.229  
2.216  
2.213  
2.202  
2.199  
1.642  
1.627  
1.612  
1.597  
1.582  
-0.000

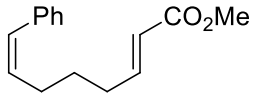

<sup>1</sup>H NMR  
500 MHz  
CDCl<sub>3</sub>

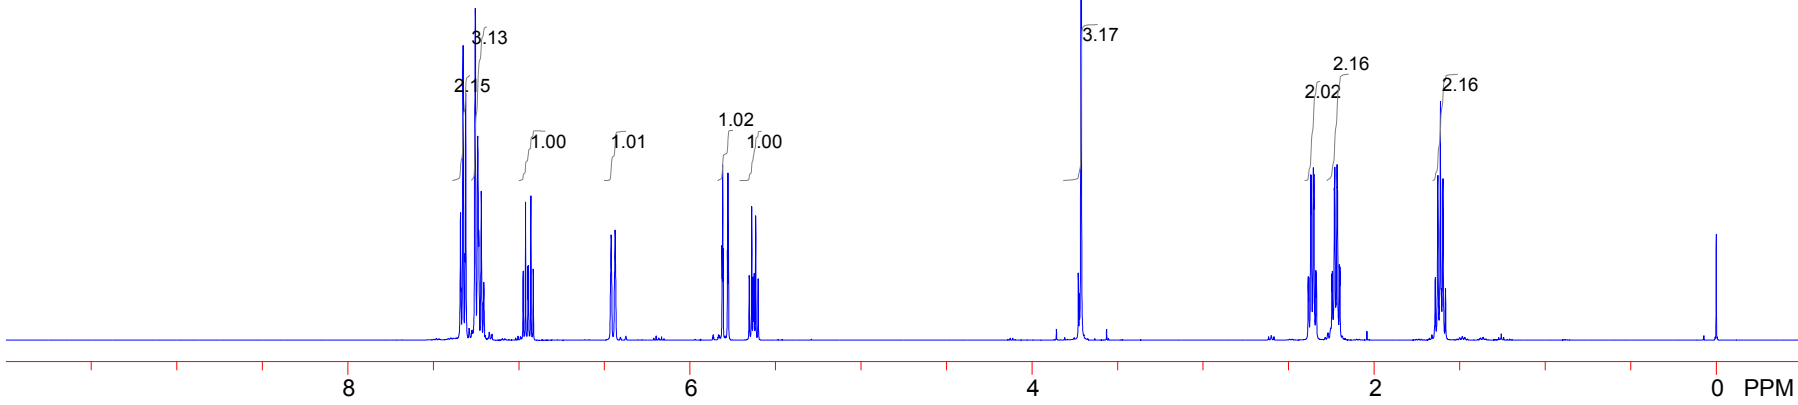

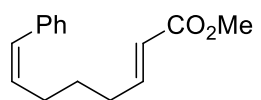

<sup>13</sup>C NMR  
125 MHz  
CDCl<sub>3</sub>

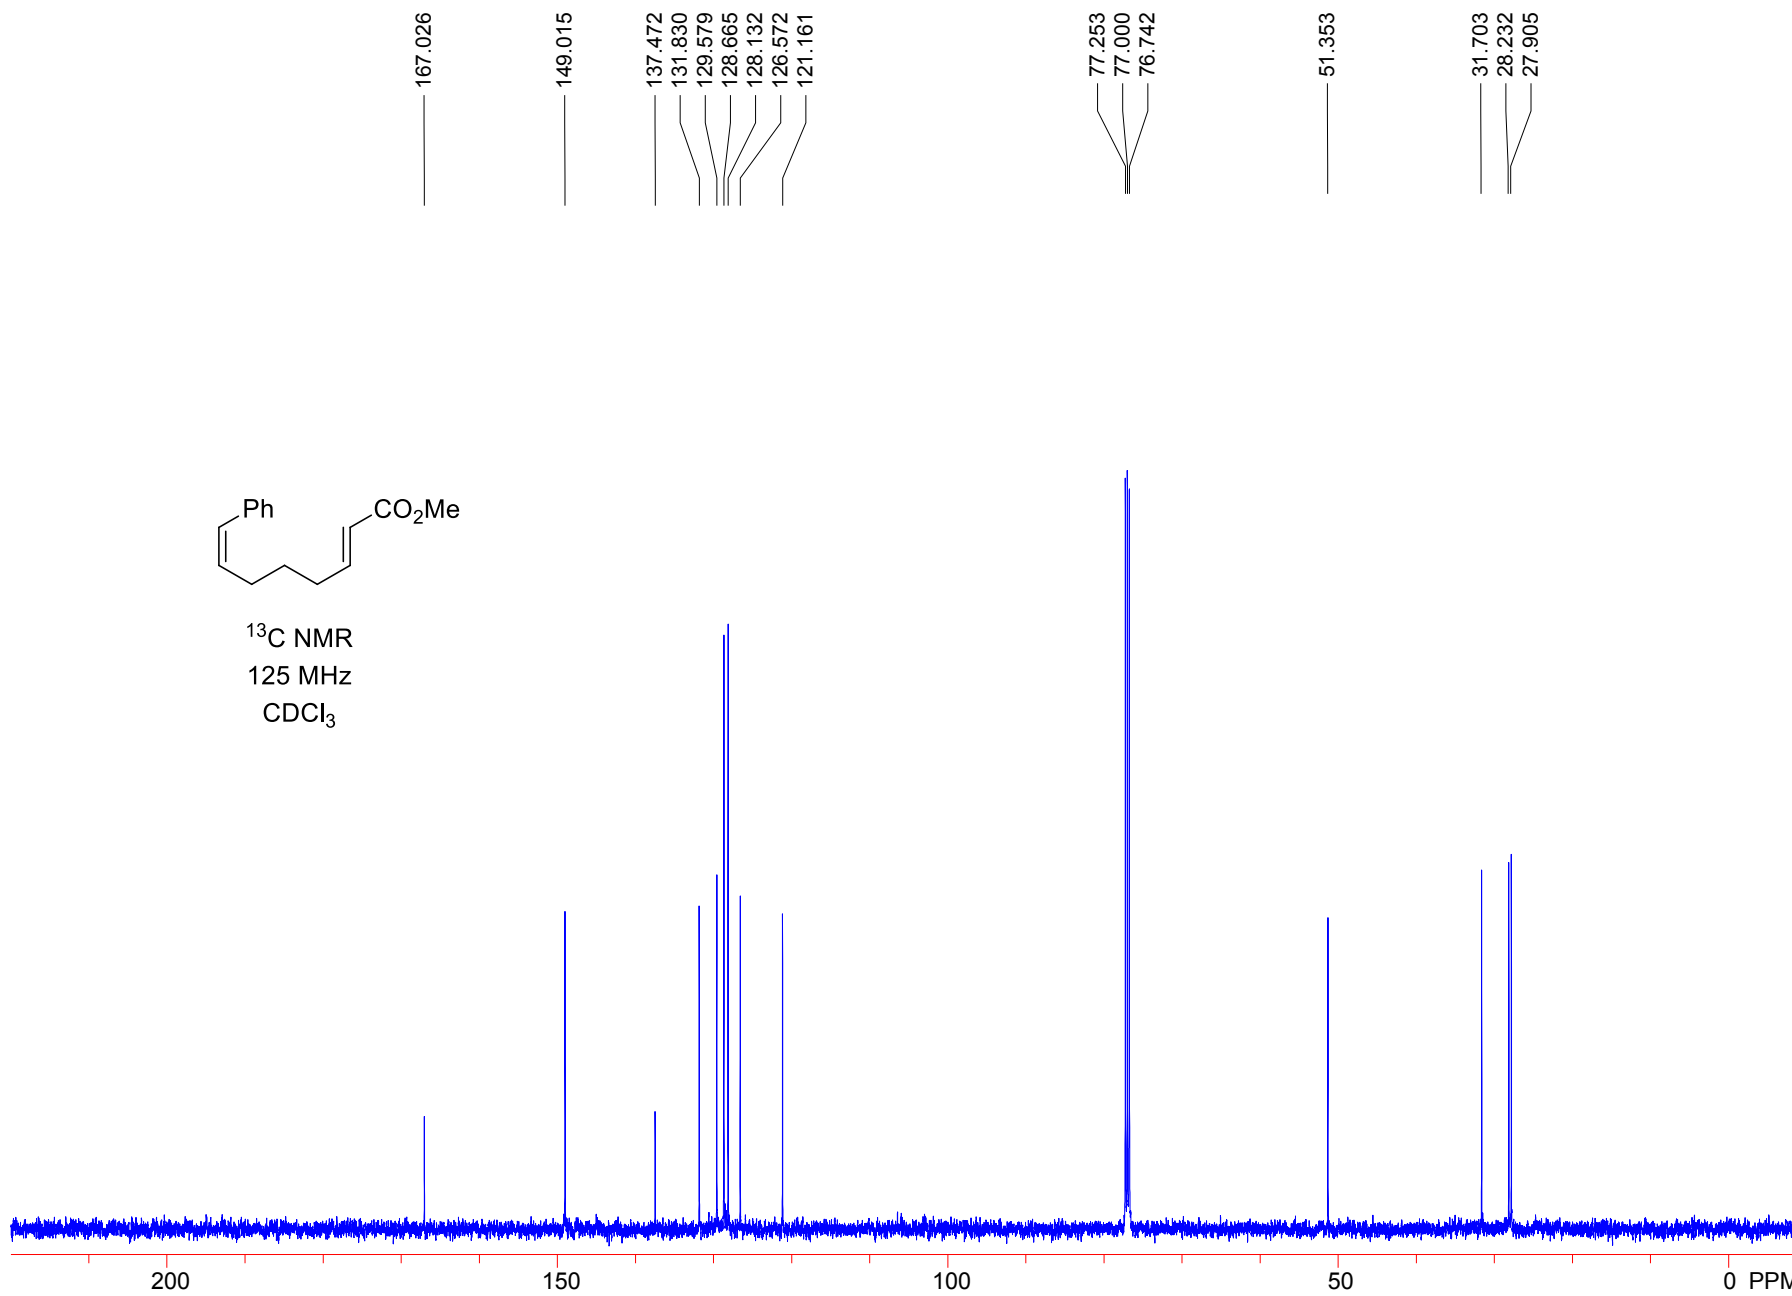

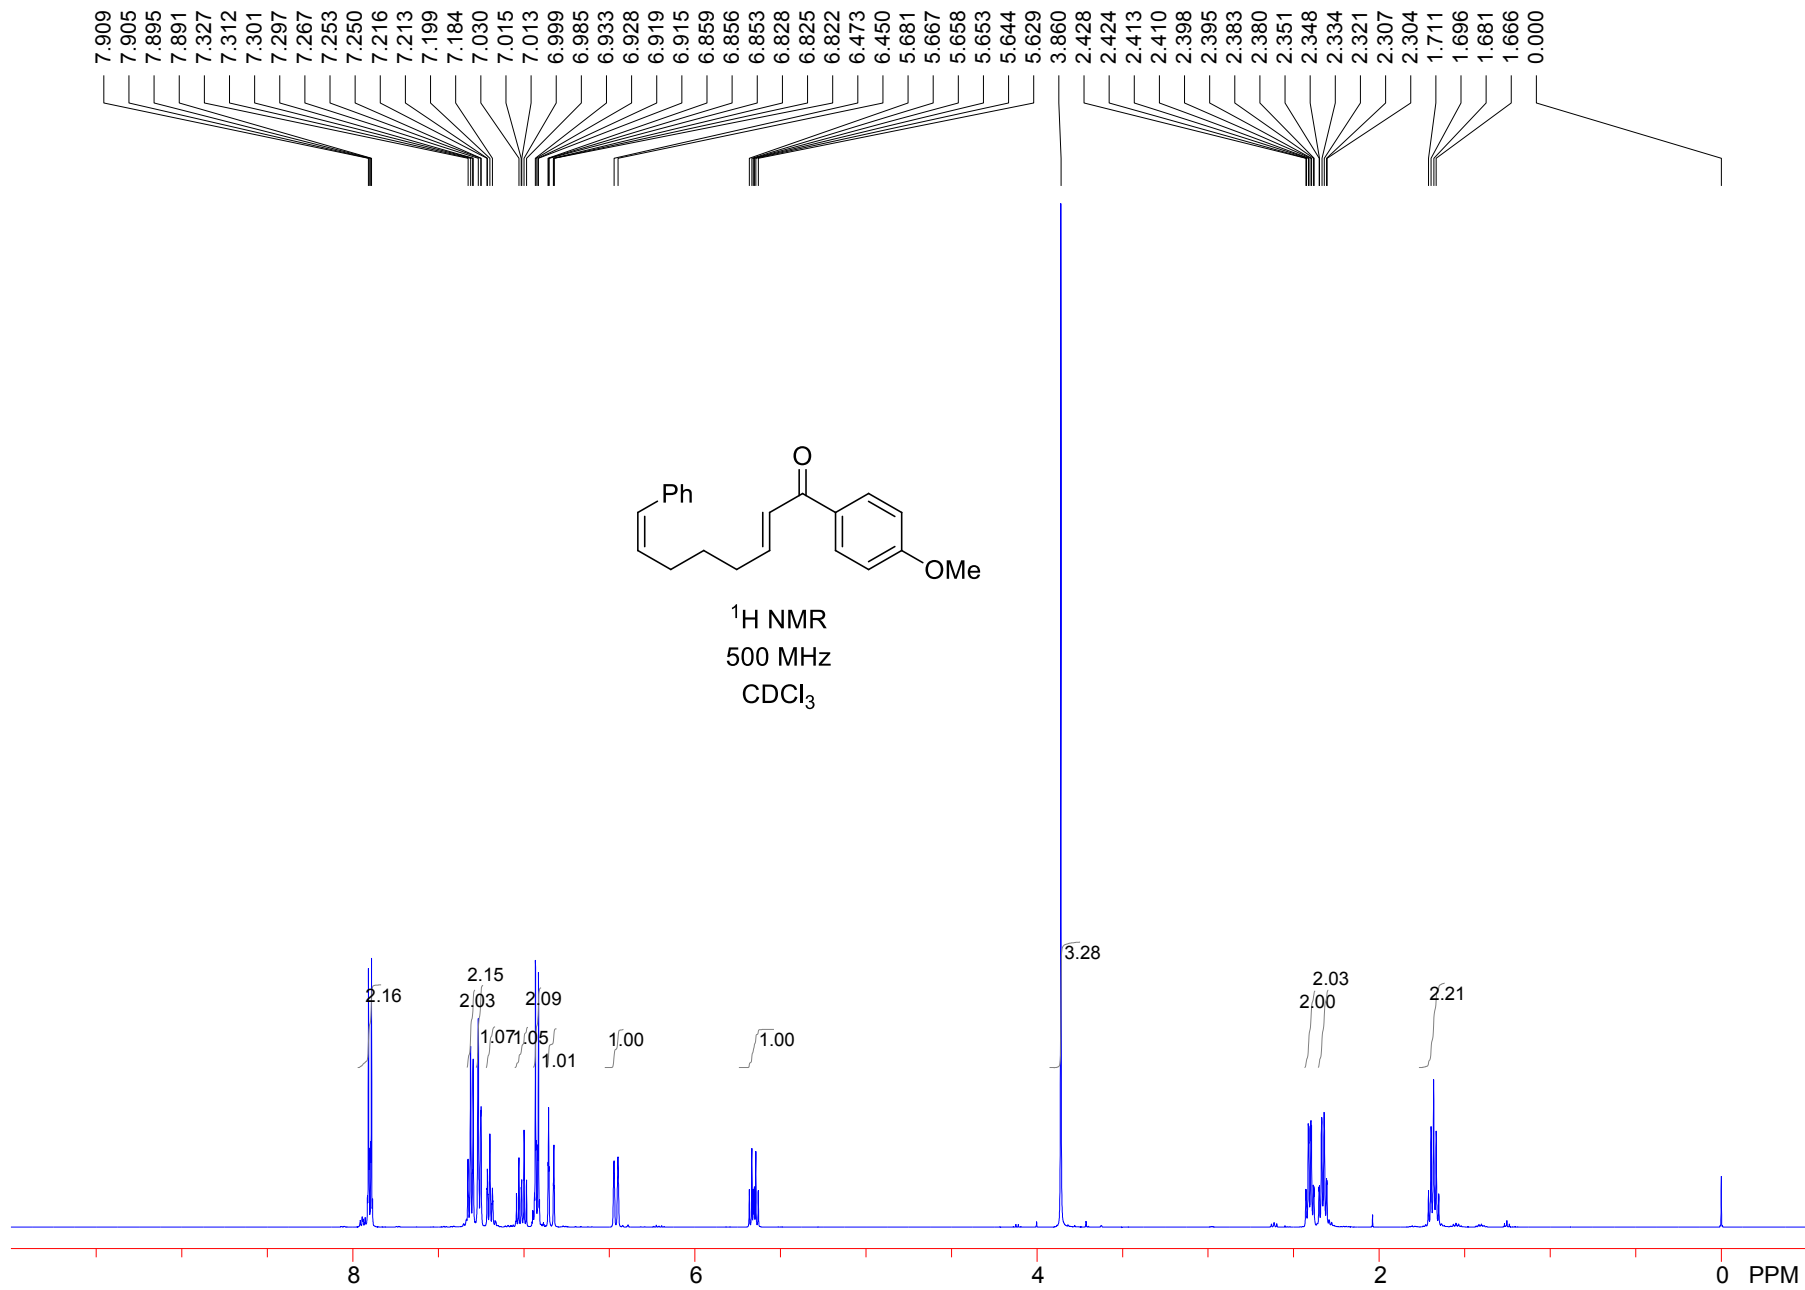

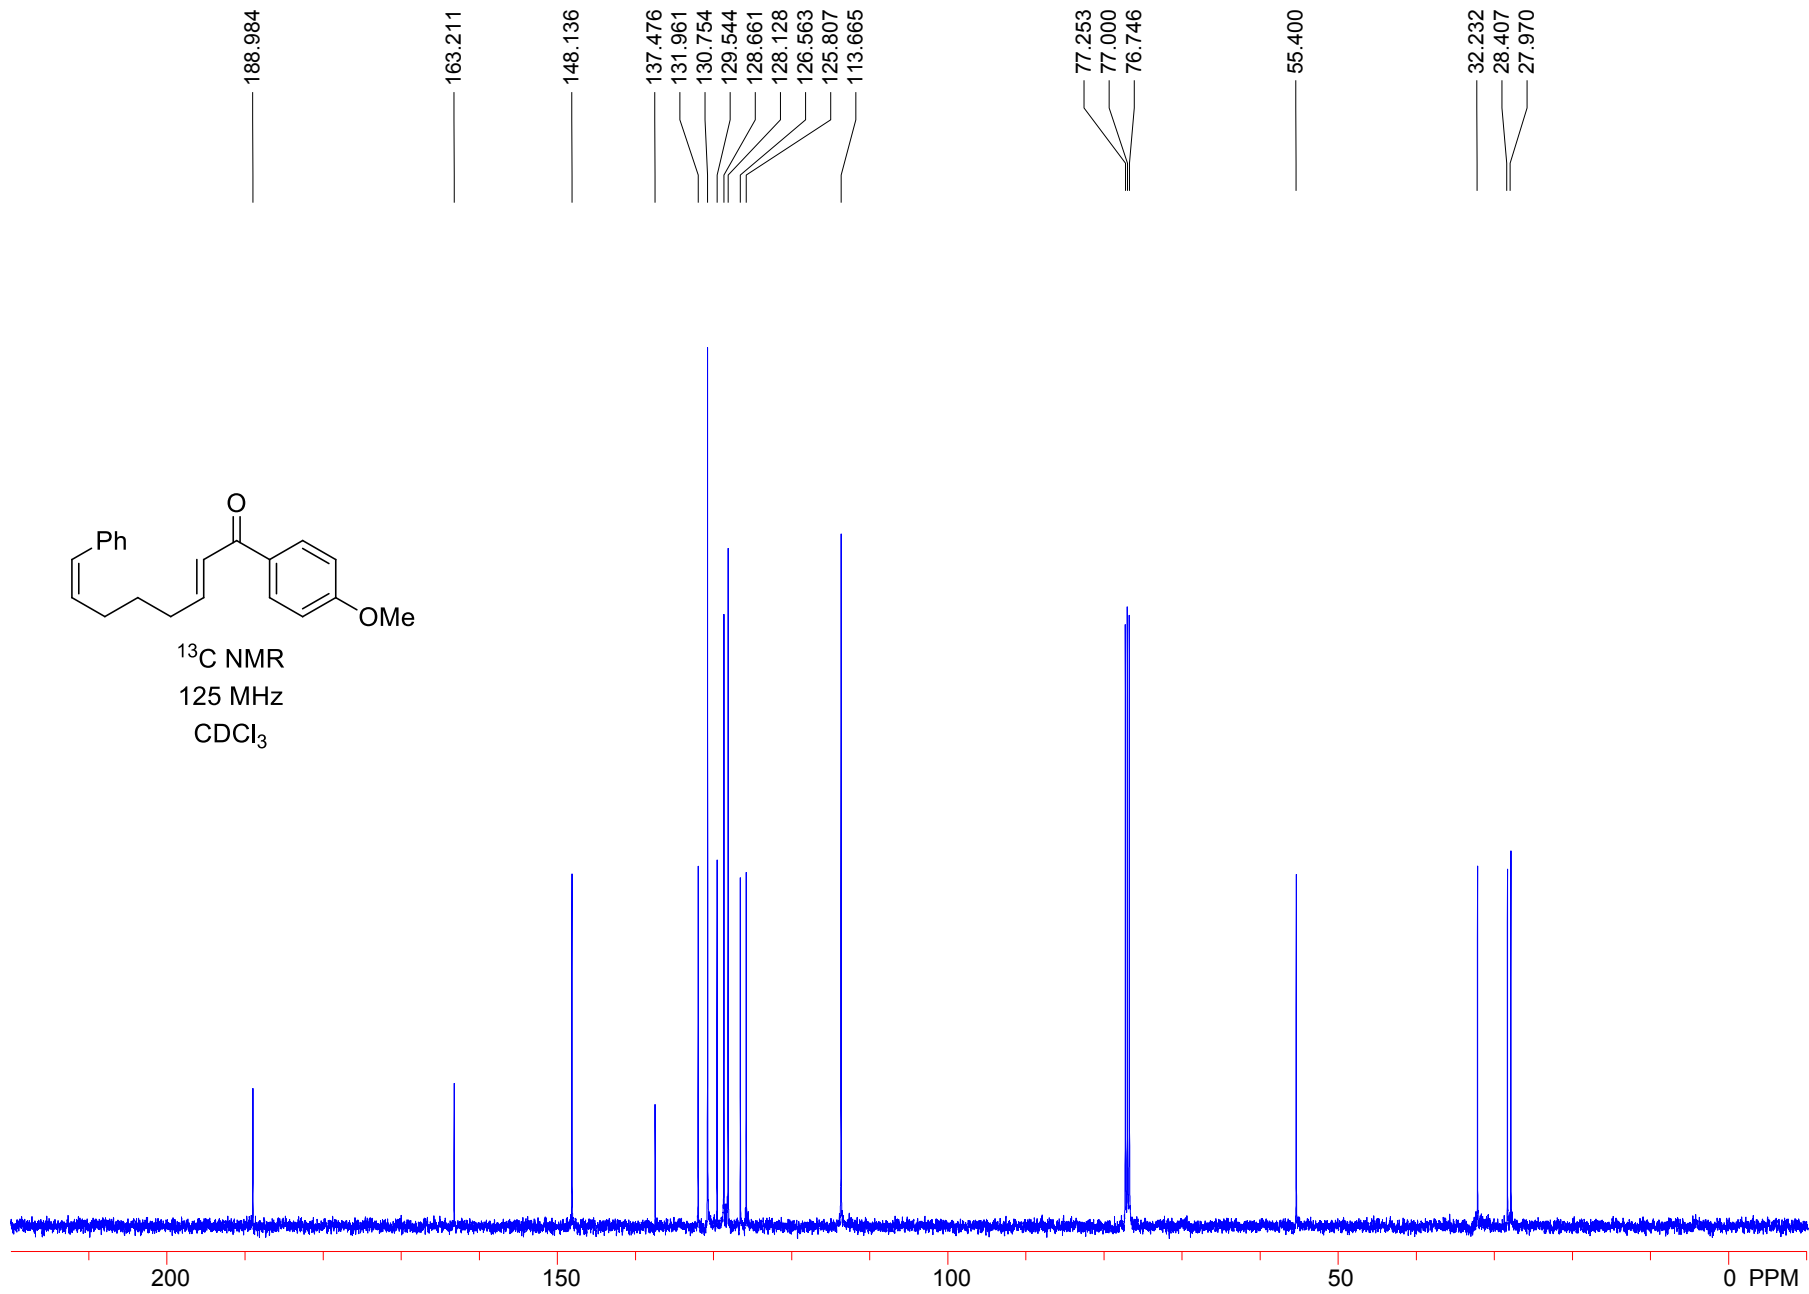



7.395  
7.392  
7.378  
7.325  
7.322  
7.311  
7.296  
7.251  
7.247  
7.239  
7.235  
6.629  
6.598  
6.320  
6.308  
6.296  
6.288  
6.276  
6.264  
5.291  
5.278  
5.264  
4.816  
4.811  
4.806  
4.803  
4.799  
4.794  
4.181  
4.178  
4.169  
4.166  
4.087  
4.082  
4.077  
4.073  
4.068  
4.064

-0.000

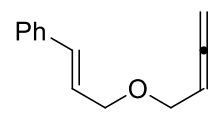

<sup>1</sup>H NMR  
500 MHz  
CDCl<sub>3</sub>

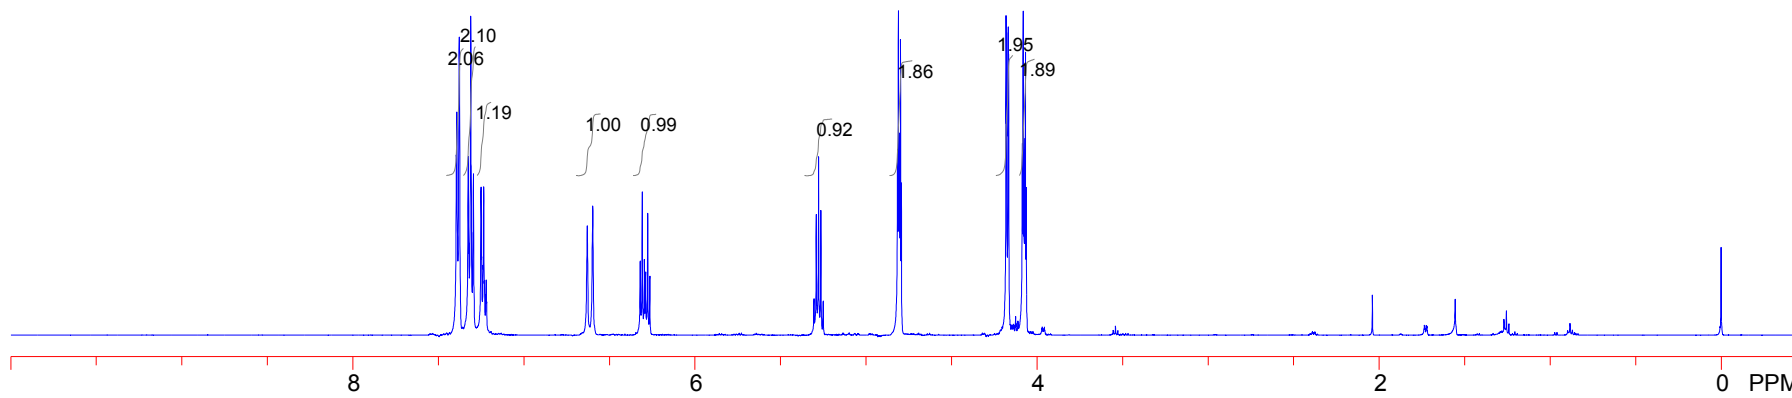

S-41

209.378

136.712  
132.656  
128.539  
127.673  
126.489  
125.851

87.708  
77.254  
77.000  
76.747  
75.680  
70.413  
67.835

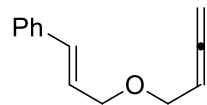

<sup>13</sup>C NMR  
125 MHz  
CDCl<sub>3</sub>

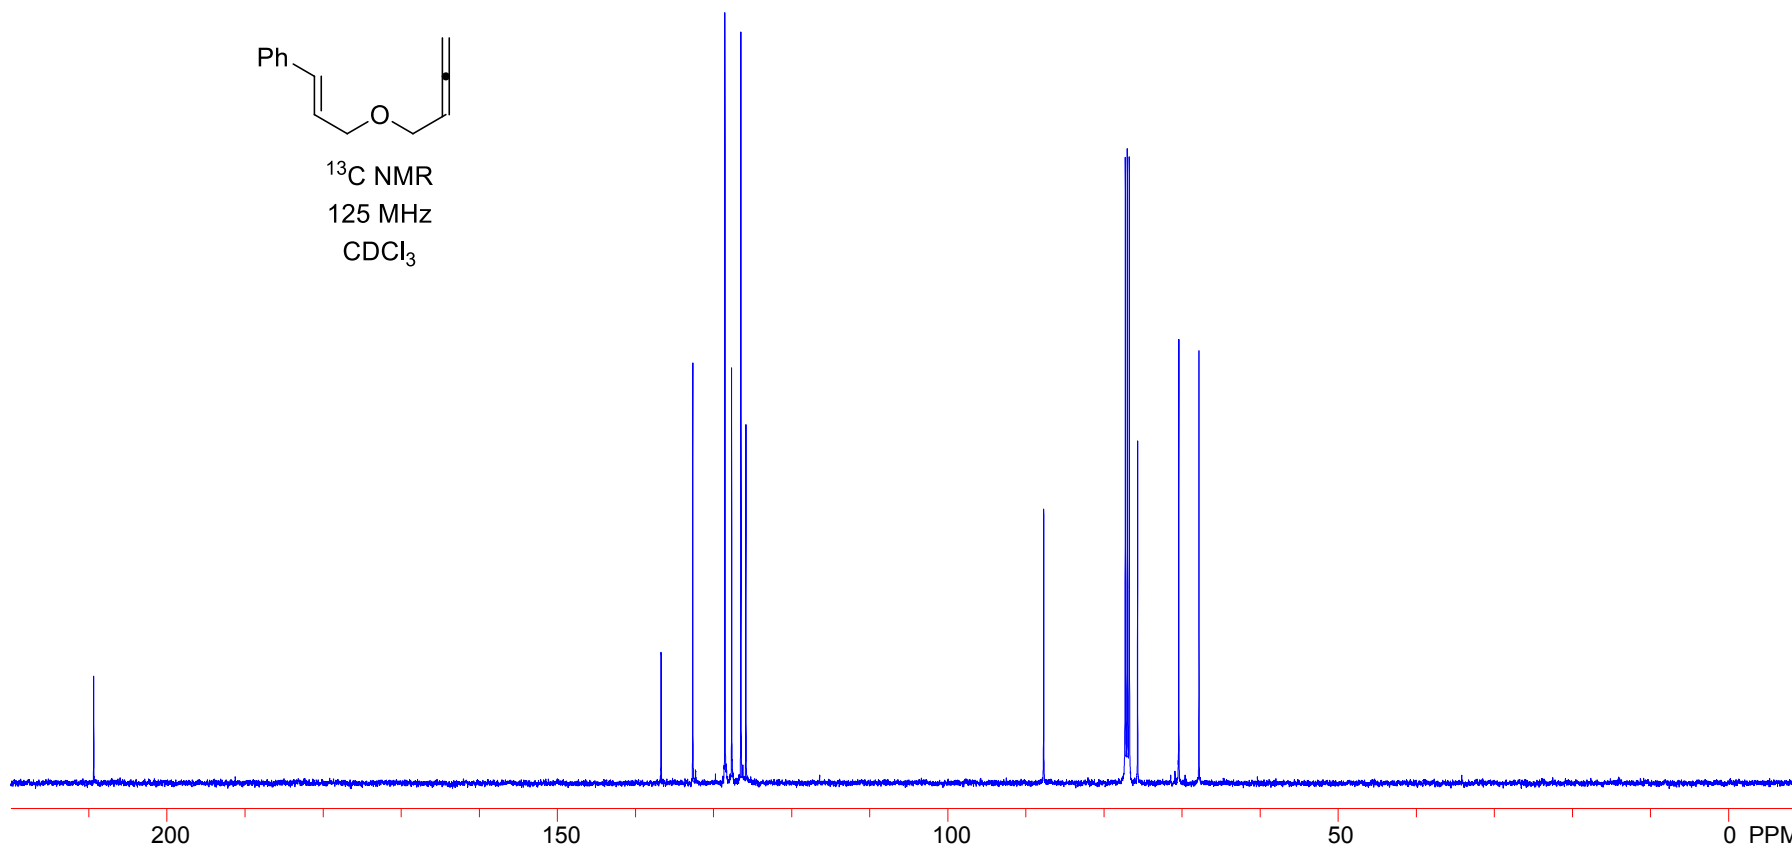

7.744  
7.740  
7.727  
7.298  
7.294  
7.282  
7.281  
7.276  
7.271  
7.268  
7.266  
7.261  
7.258  
7.251  
7.240  
7.236  
7.061  
6.898  
6.896  
6.880  
6.534  
6.509  
6.492  
6.460  
6.021  
5.989  
5.103  
5.079  
4.018  
4.006  
3.888  
3.873

2.413

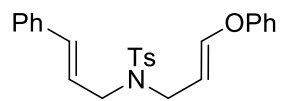

<sup>1</sup>H NMR  
500 MHz  
CDCl<sub>3</sub>

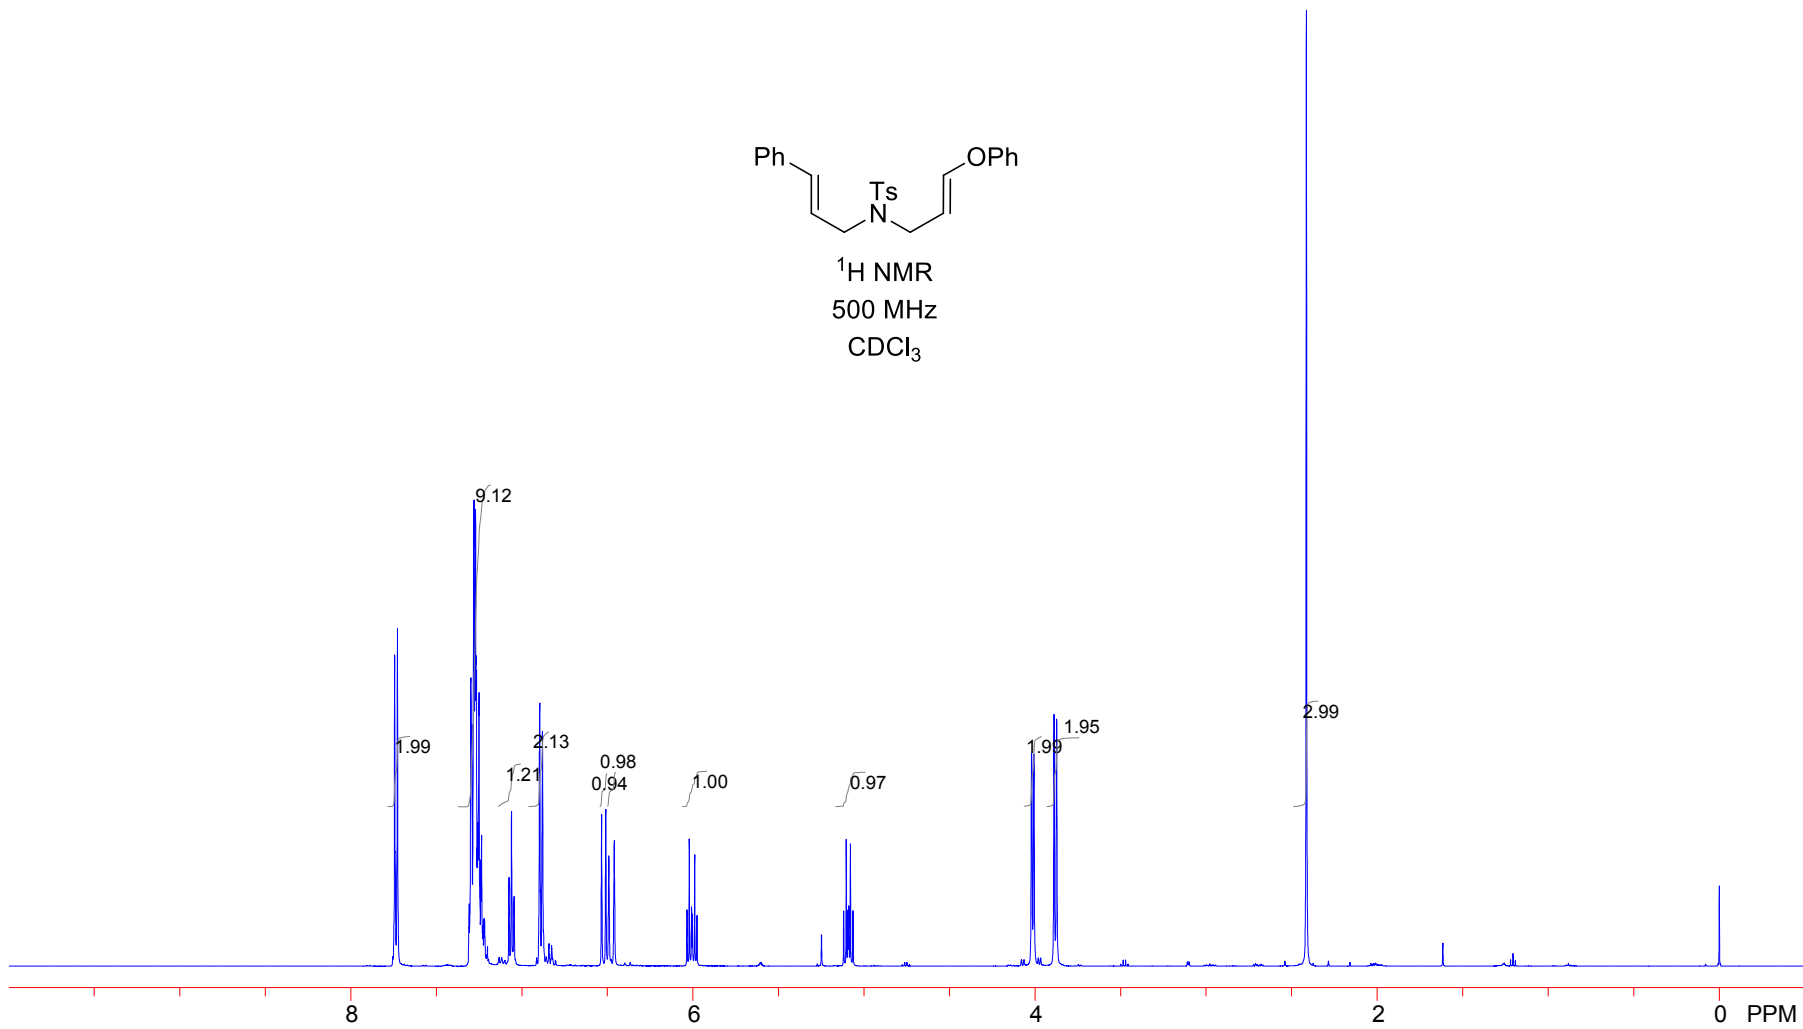

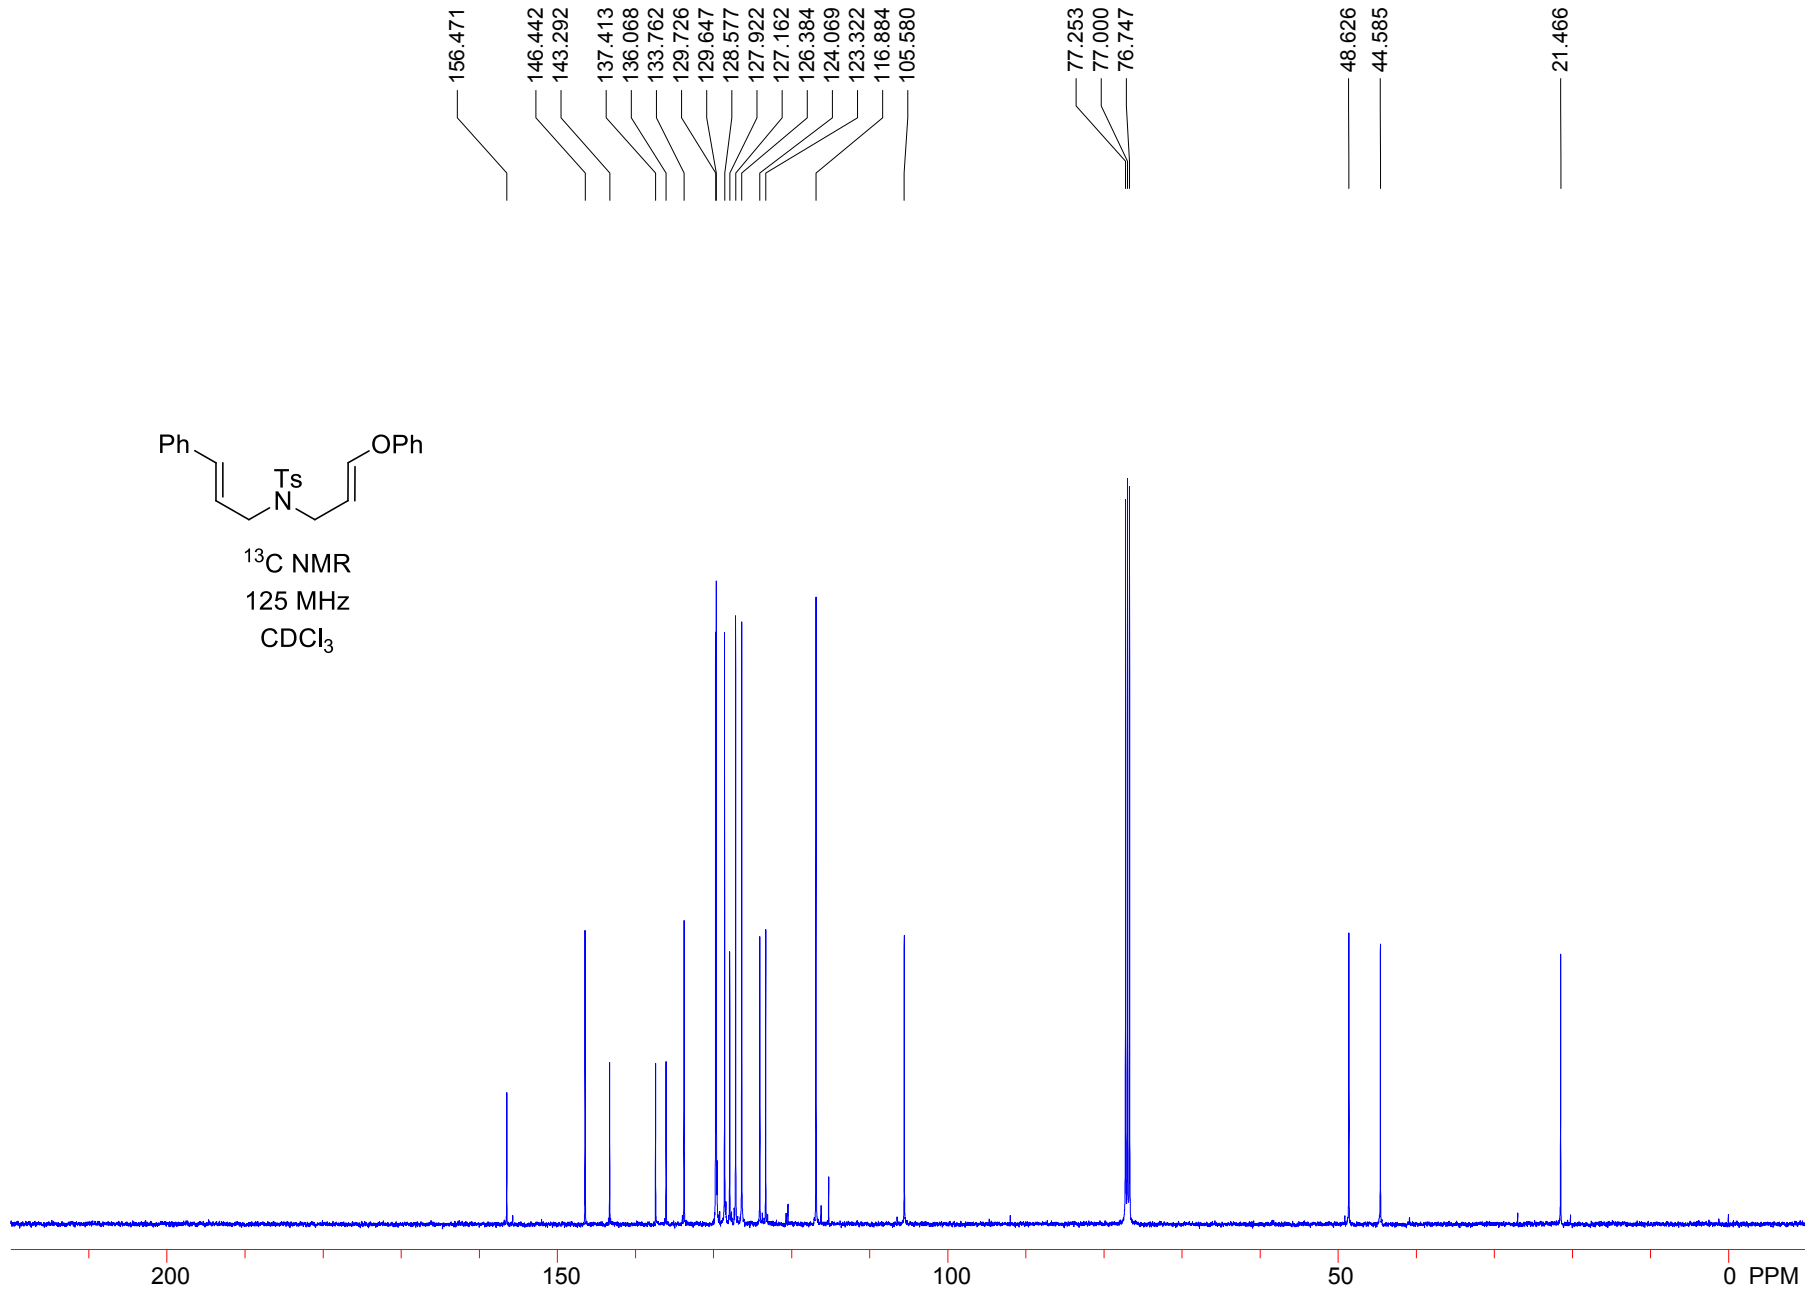

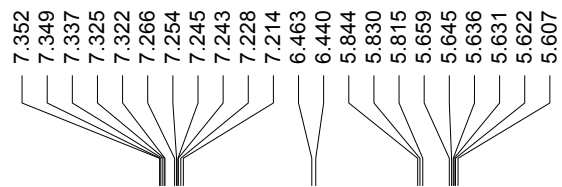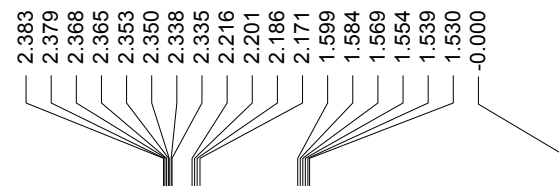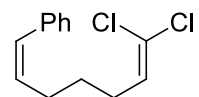

<sup>1</sup>H NMR  
500 MHz  
CDCl<sub>3</sub>

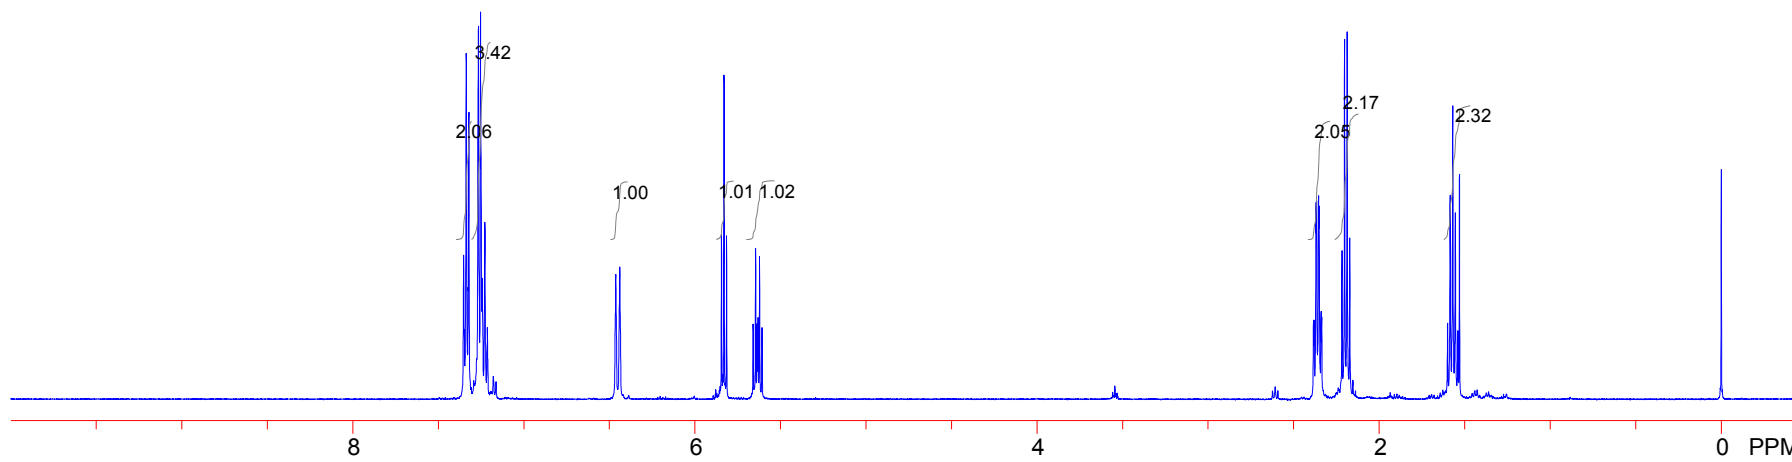

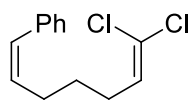

$^{13}\text{C}$  NMR  
125 MHz  
 $\text{CDCl}_3$

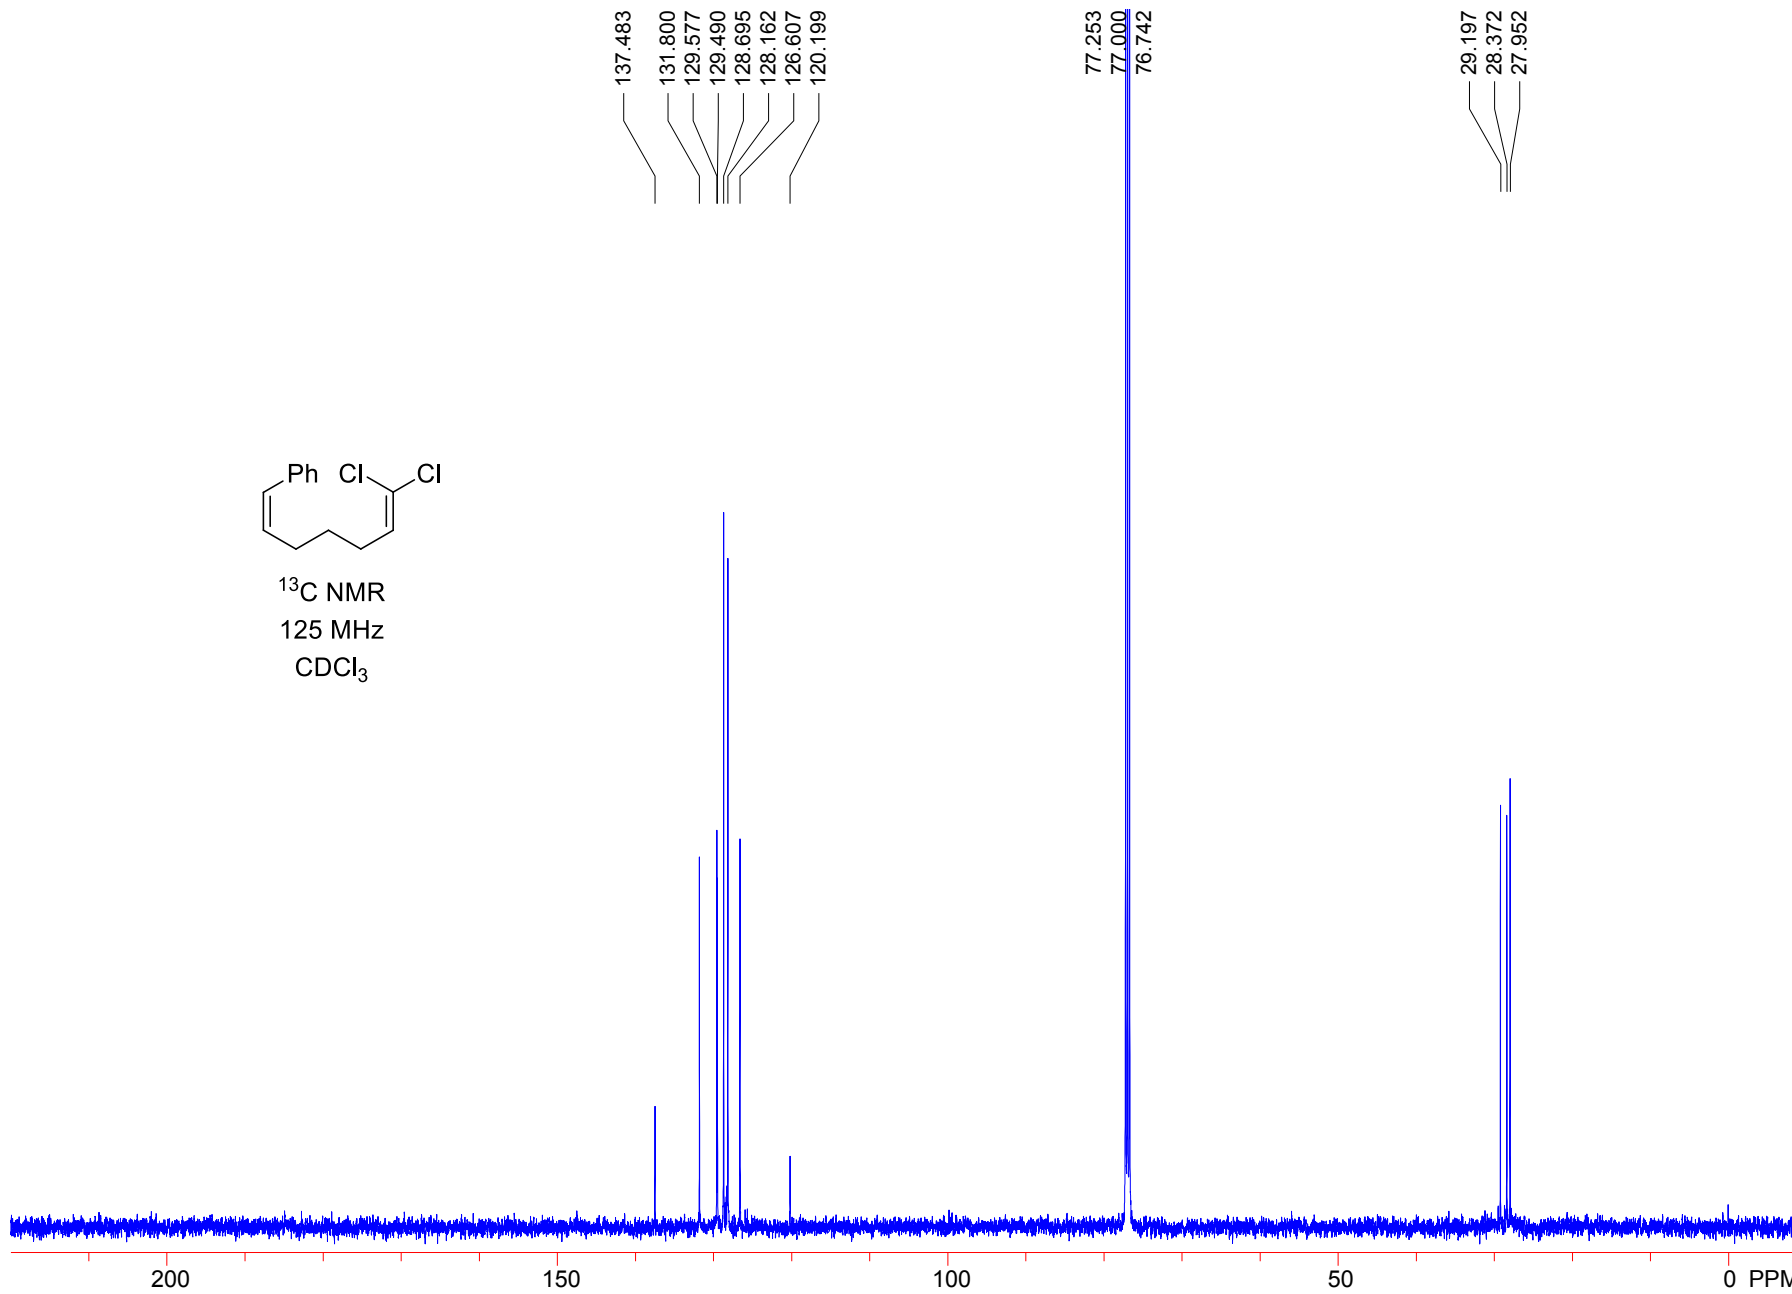

7.712  
7.696  
7.319  
7.303  
7.297  
7.282  
7.265  
7.252  
7.239  
6.428  
6.396  
6.380  
6.367  
6.355  
6.351  
6.338  
6.326  
6.281  
6.279  
6.252  
6.250  
5.948  
5.934  
5.921  
5.916  
5.903  
5.889  
3.950  
3.937  
3.784  
3.772

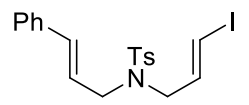

<sup>1</sup>H NMR  
500M Hz  
CDCl<sub>3</sub>

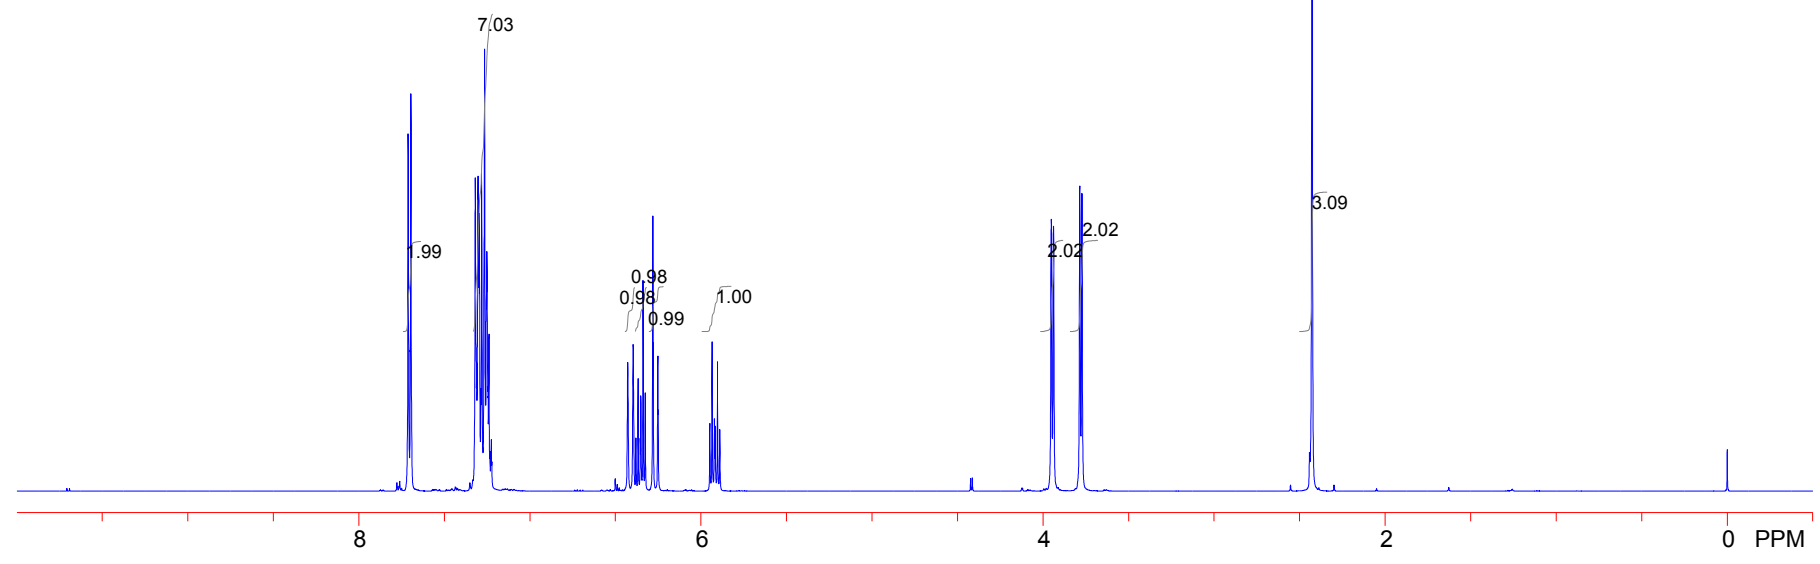

2.427

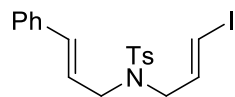

$^{13}\text{C}$  NMR  
125M Hz  
 $\text{CDCl}_3$

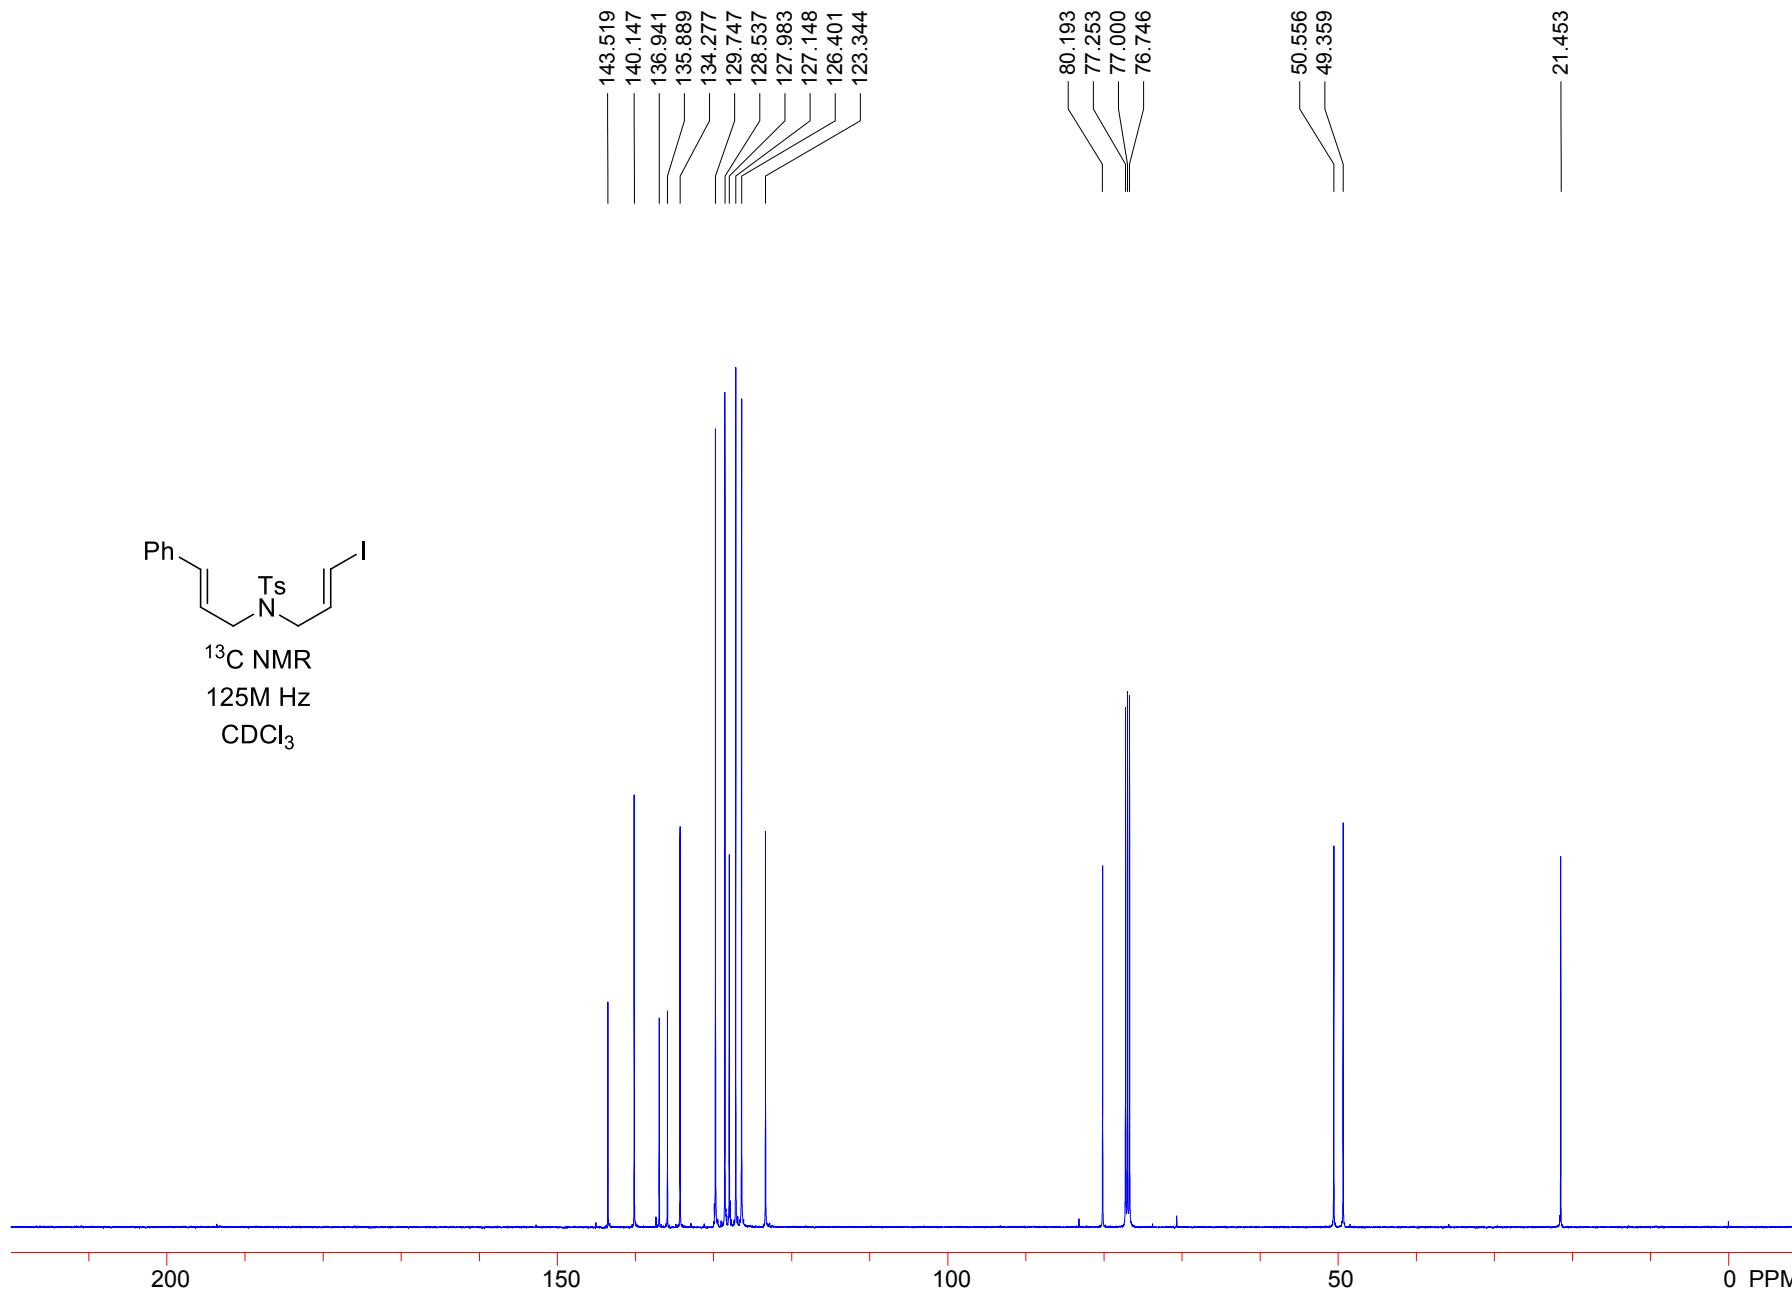



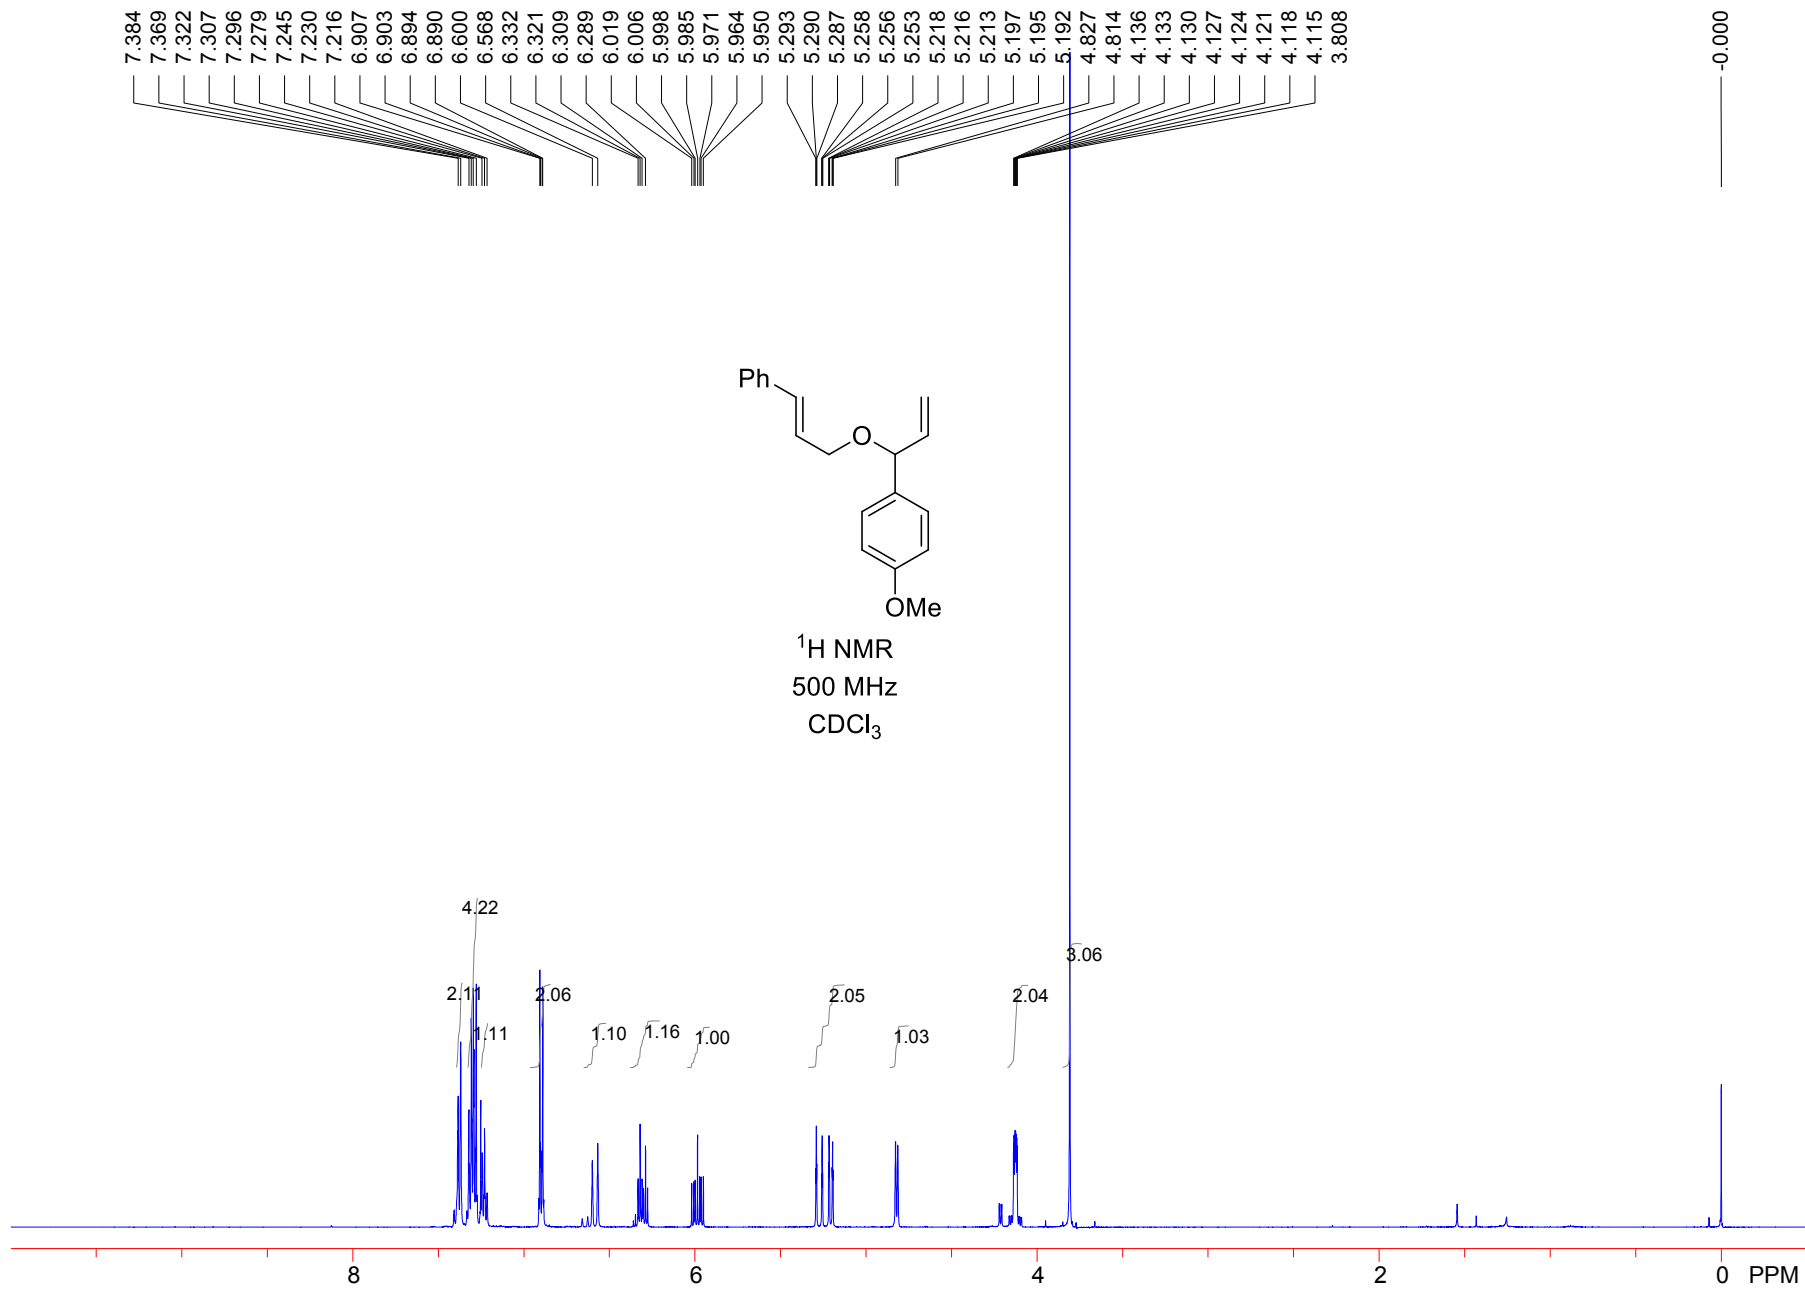

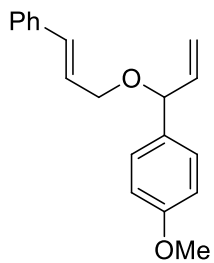

<sup>13</sup>C NMR  
125 MHz  
CDCl<sub>3</sub>

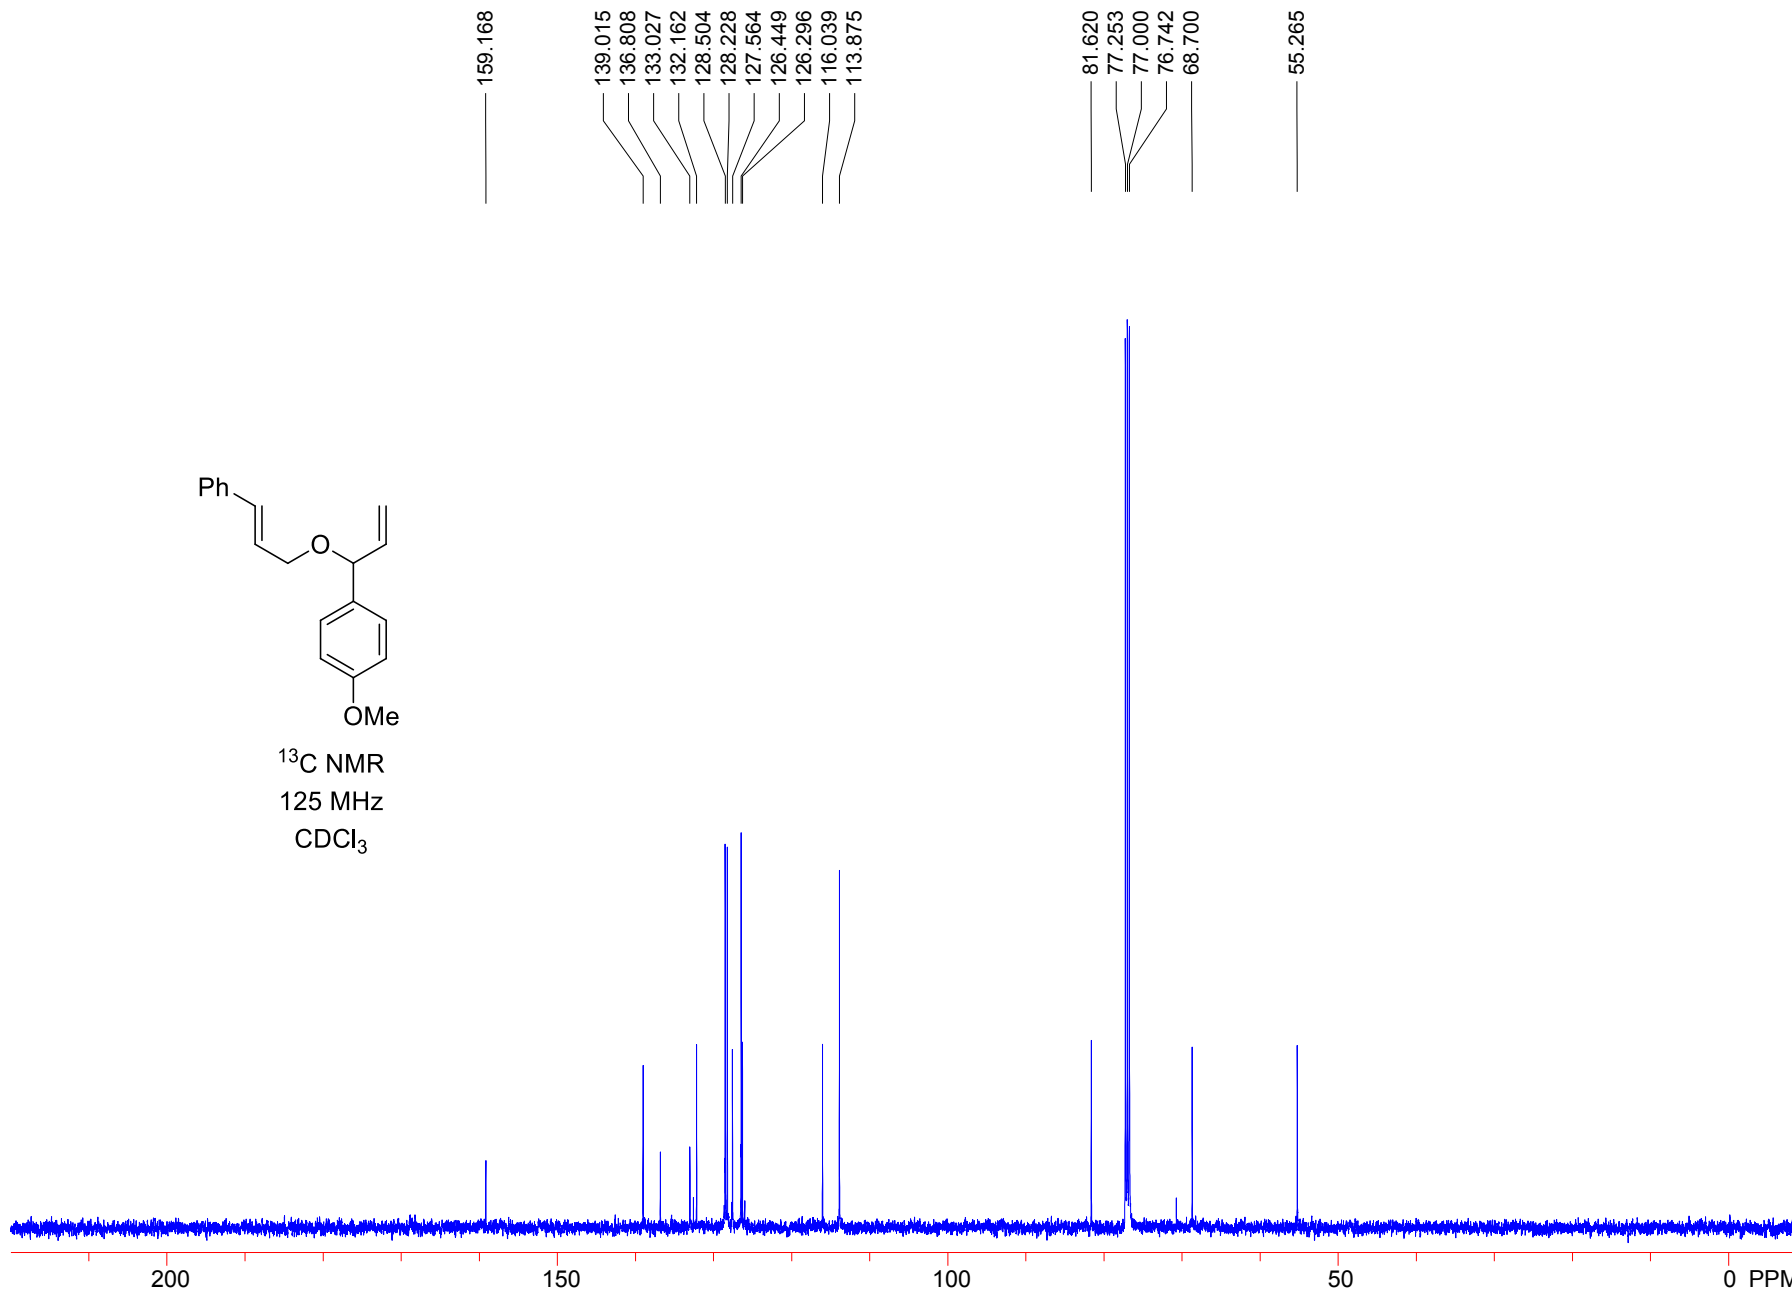

7.333  
7.329  
7.317  
7.306  
7.303  
7.281  
7.278  
7.265  
7.227  
7.222  
7.219  
7.216  
7.205  
6.416  
6.393  
5.687  
5.673  
5.664  
5.658  
5.650  
5.120  
5.109  
5.106  
5.103

2.355  
2.352  
2.341  
2.337  
2.325  
2.322  
2.311  
2.307  
2.030  
2.016  
2.001  
1.670  
1.668  
1.586  
1.574  
1.515  
1.500  
1.493  
1.485  
1.470

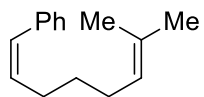

<sup>1</sup>H NMR  
500 MHz  
CDCl<sub>3</sub>

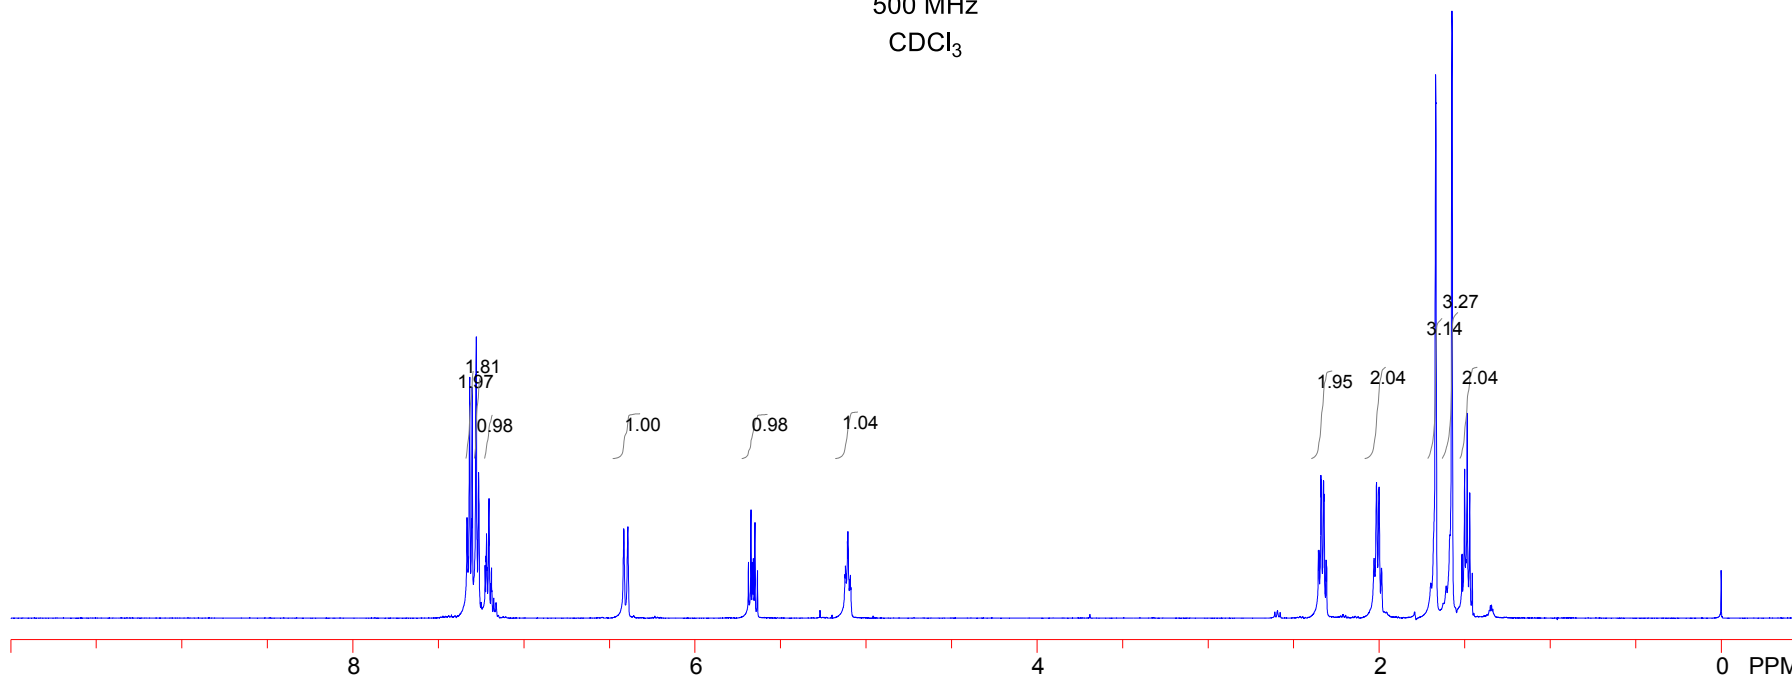

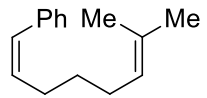

$^{13}\text{C}$  NMR  
125 MHz  
 $\text{CDCl}_3$

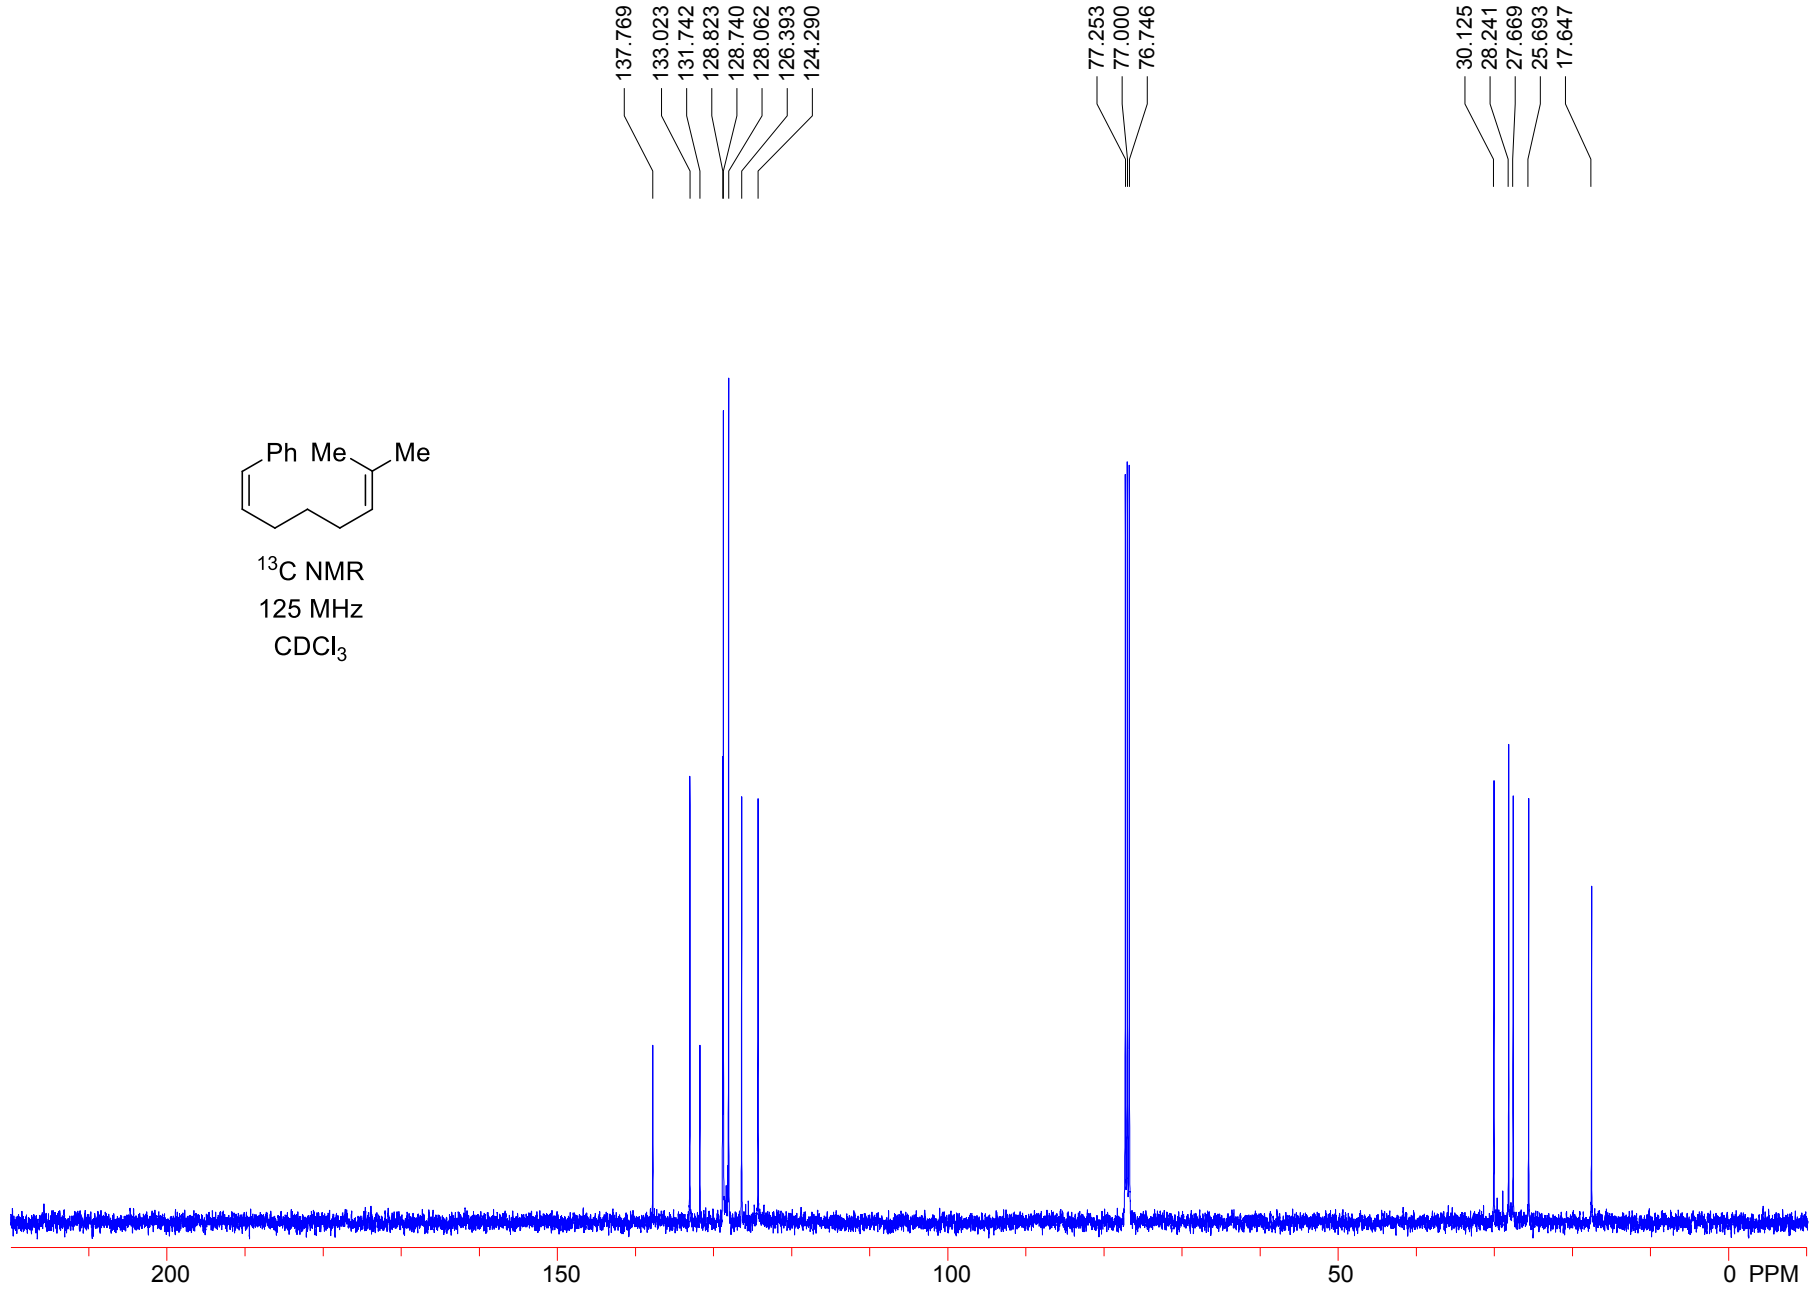

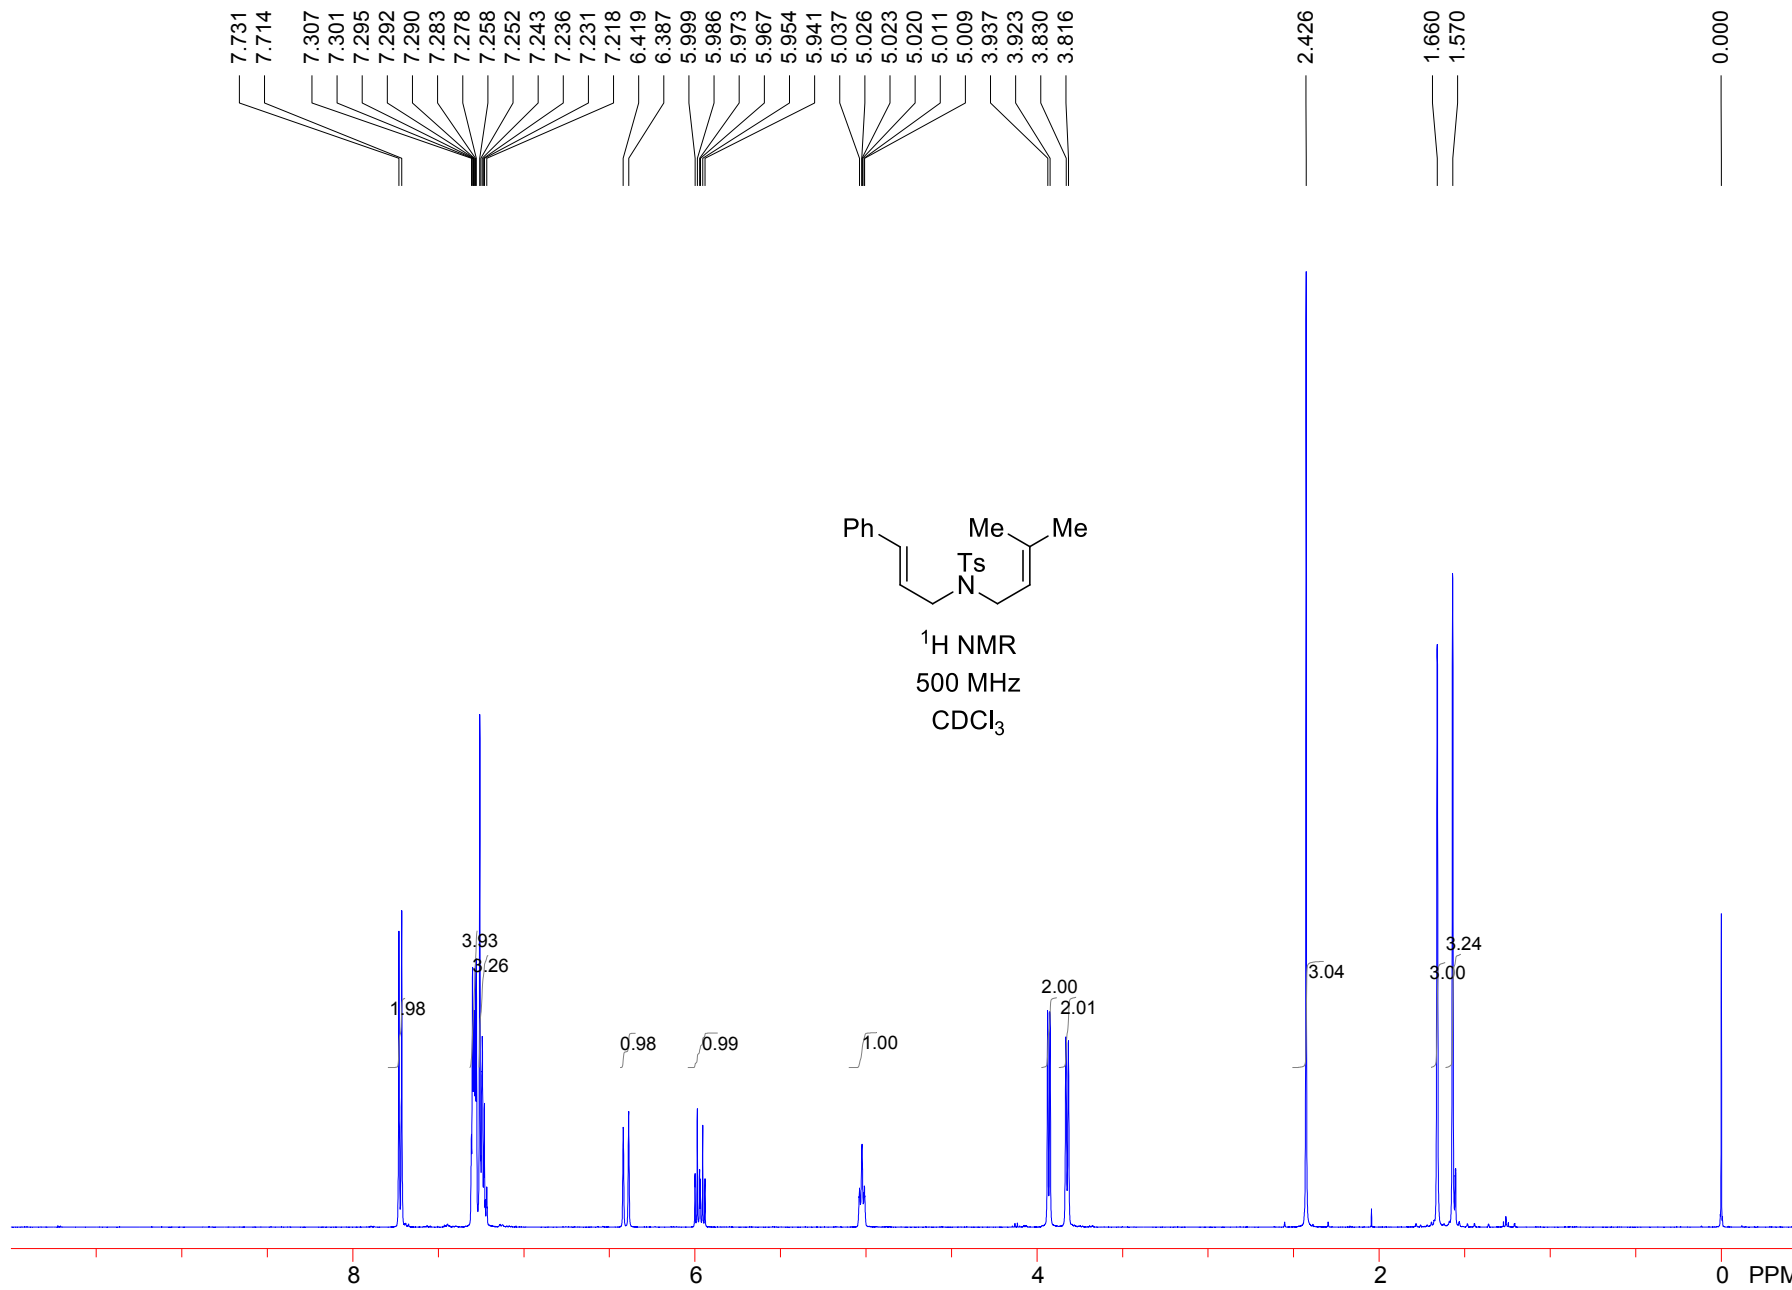

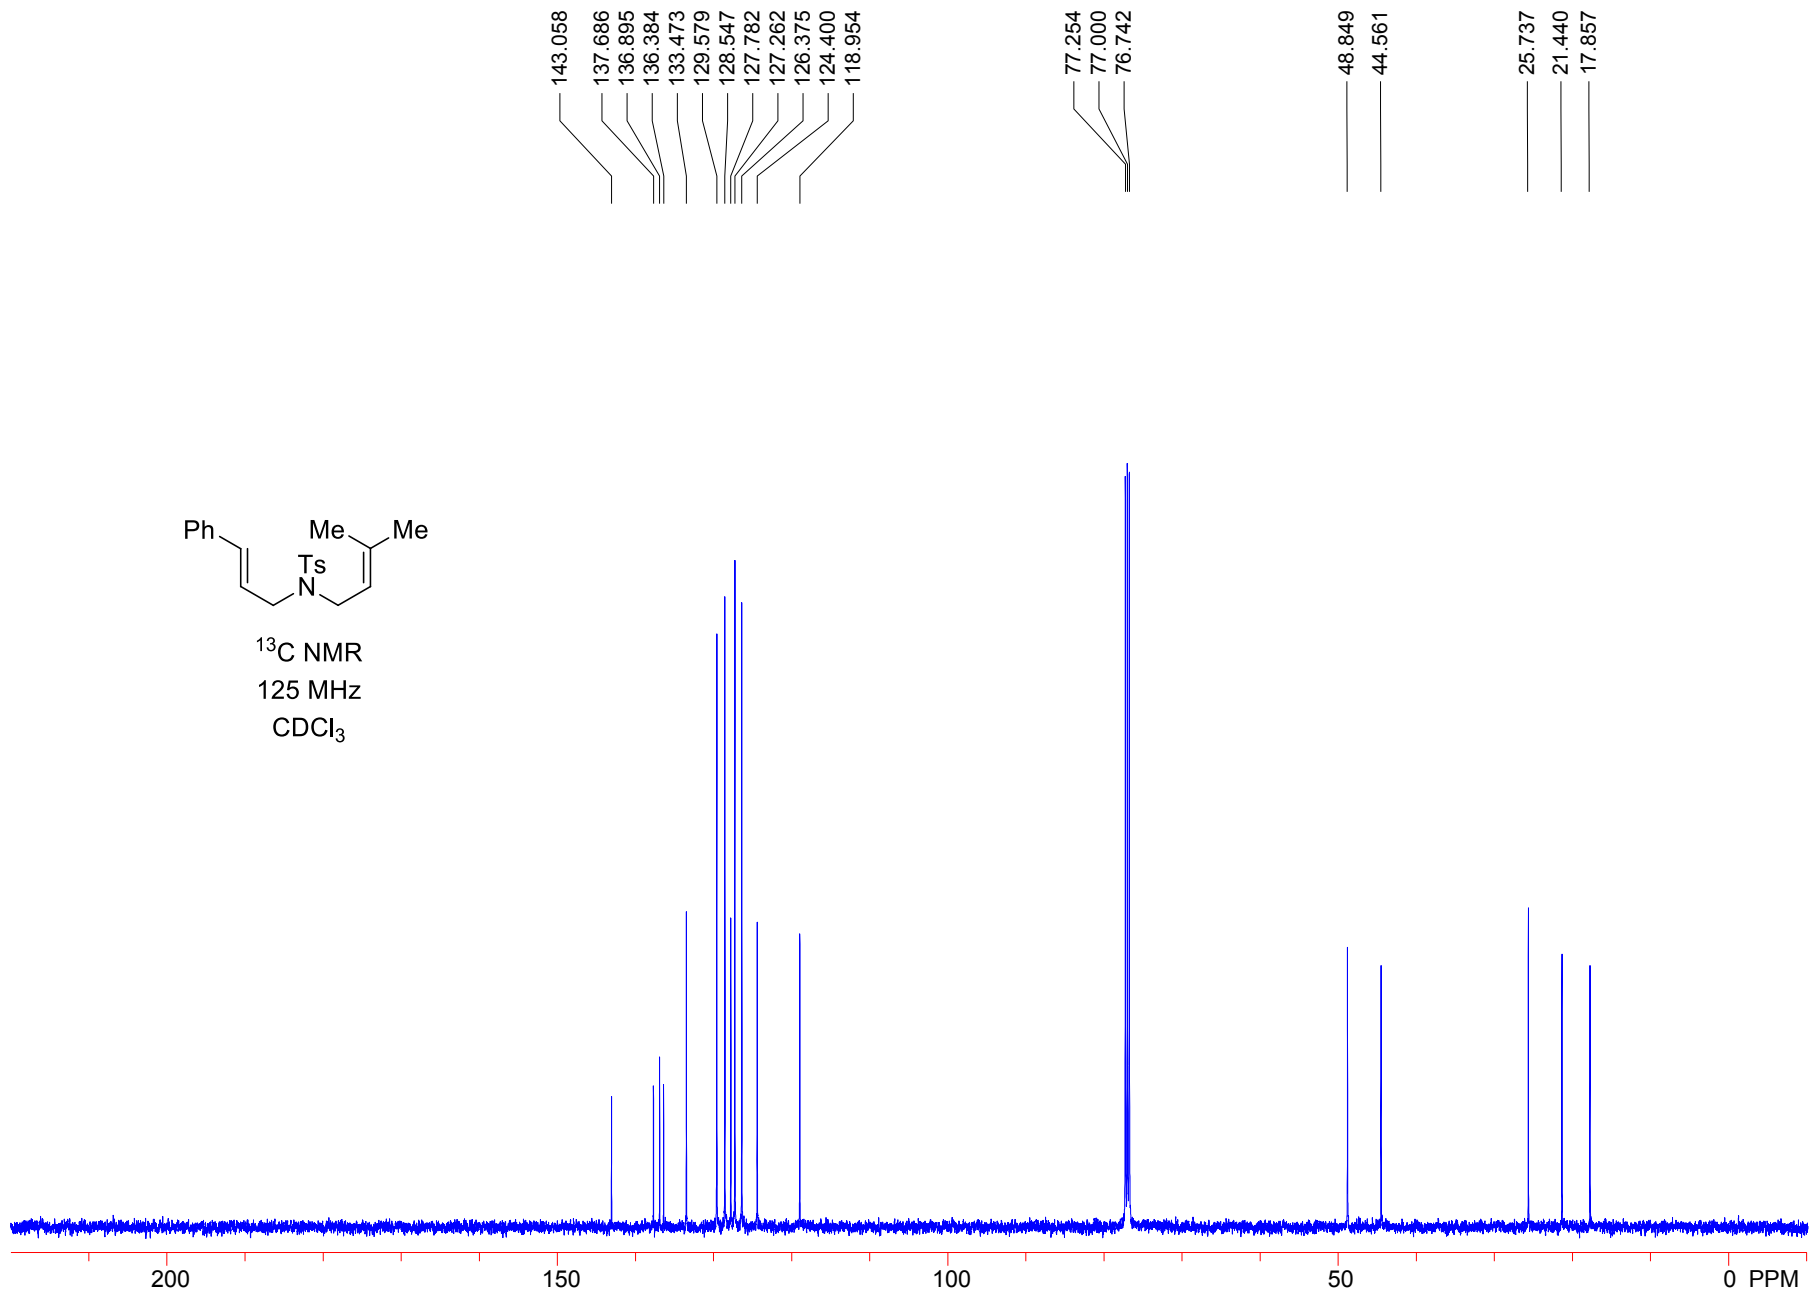

7.341  
7.325  
7.314  
7.311  
7.267  
7.253  
7.251  
7.233  
7.230  
7.216  
7.201  
6.718  
6.716  
6.703  
6.701  
6.689  
6.686  
6.440  
6.417  
5.667  
5.652  
5.643  
5.637  
5.629  
5.614

2.927  
2.912  
2.898  
2.882  
2.358  
2.354  
2.351  
2.347  
2.343  
2.340  
2.183  
2.170  
2.165  
2.162  
1.835  
1.833  
1.582  
1.507  
1.500  
1.493  
1.486  
1.479  
1.276  
1.262  
1.247  
-0.000

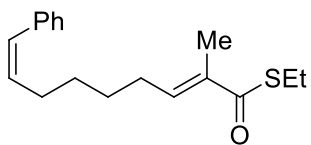

<sup>1</sup>H NMR  
500 MHz  
CDCl<sub>3</sub>

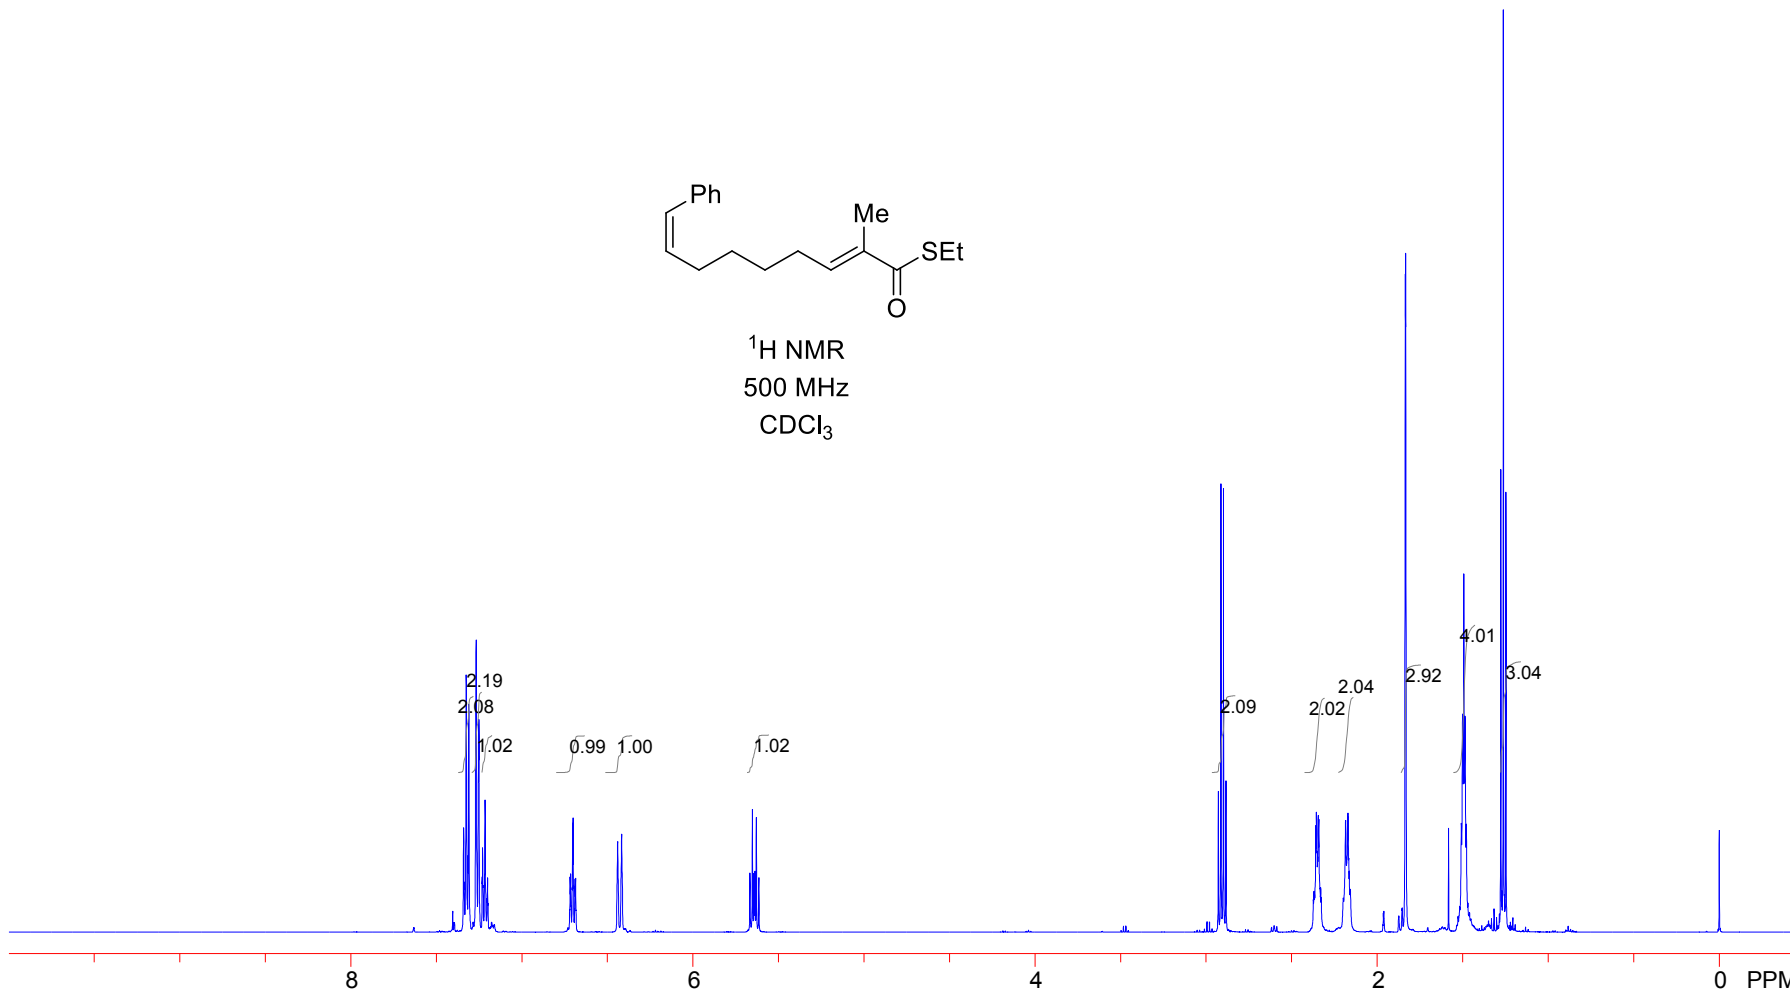

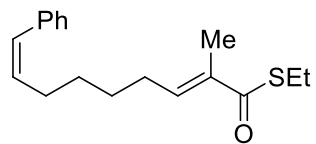

$^{13}\text{C}$  NMR  
125 MHz  
 $\text{CDCl}_3$

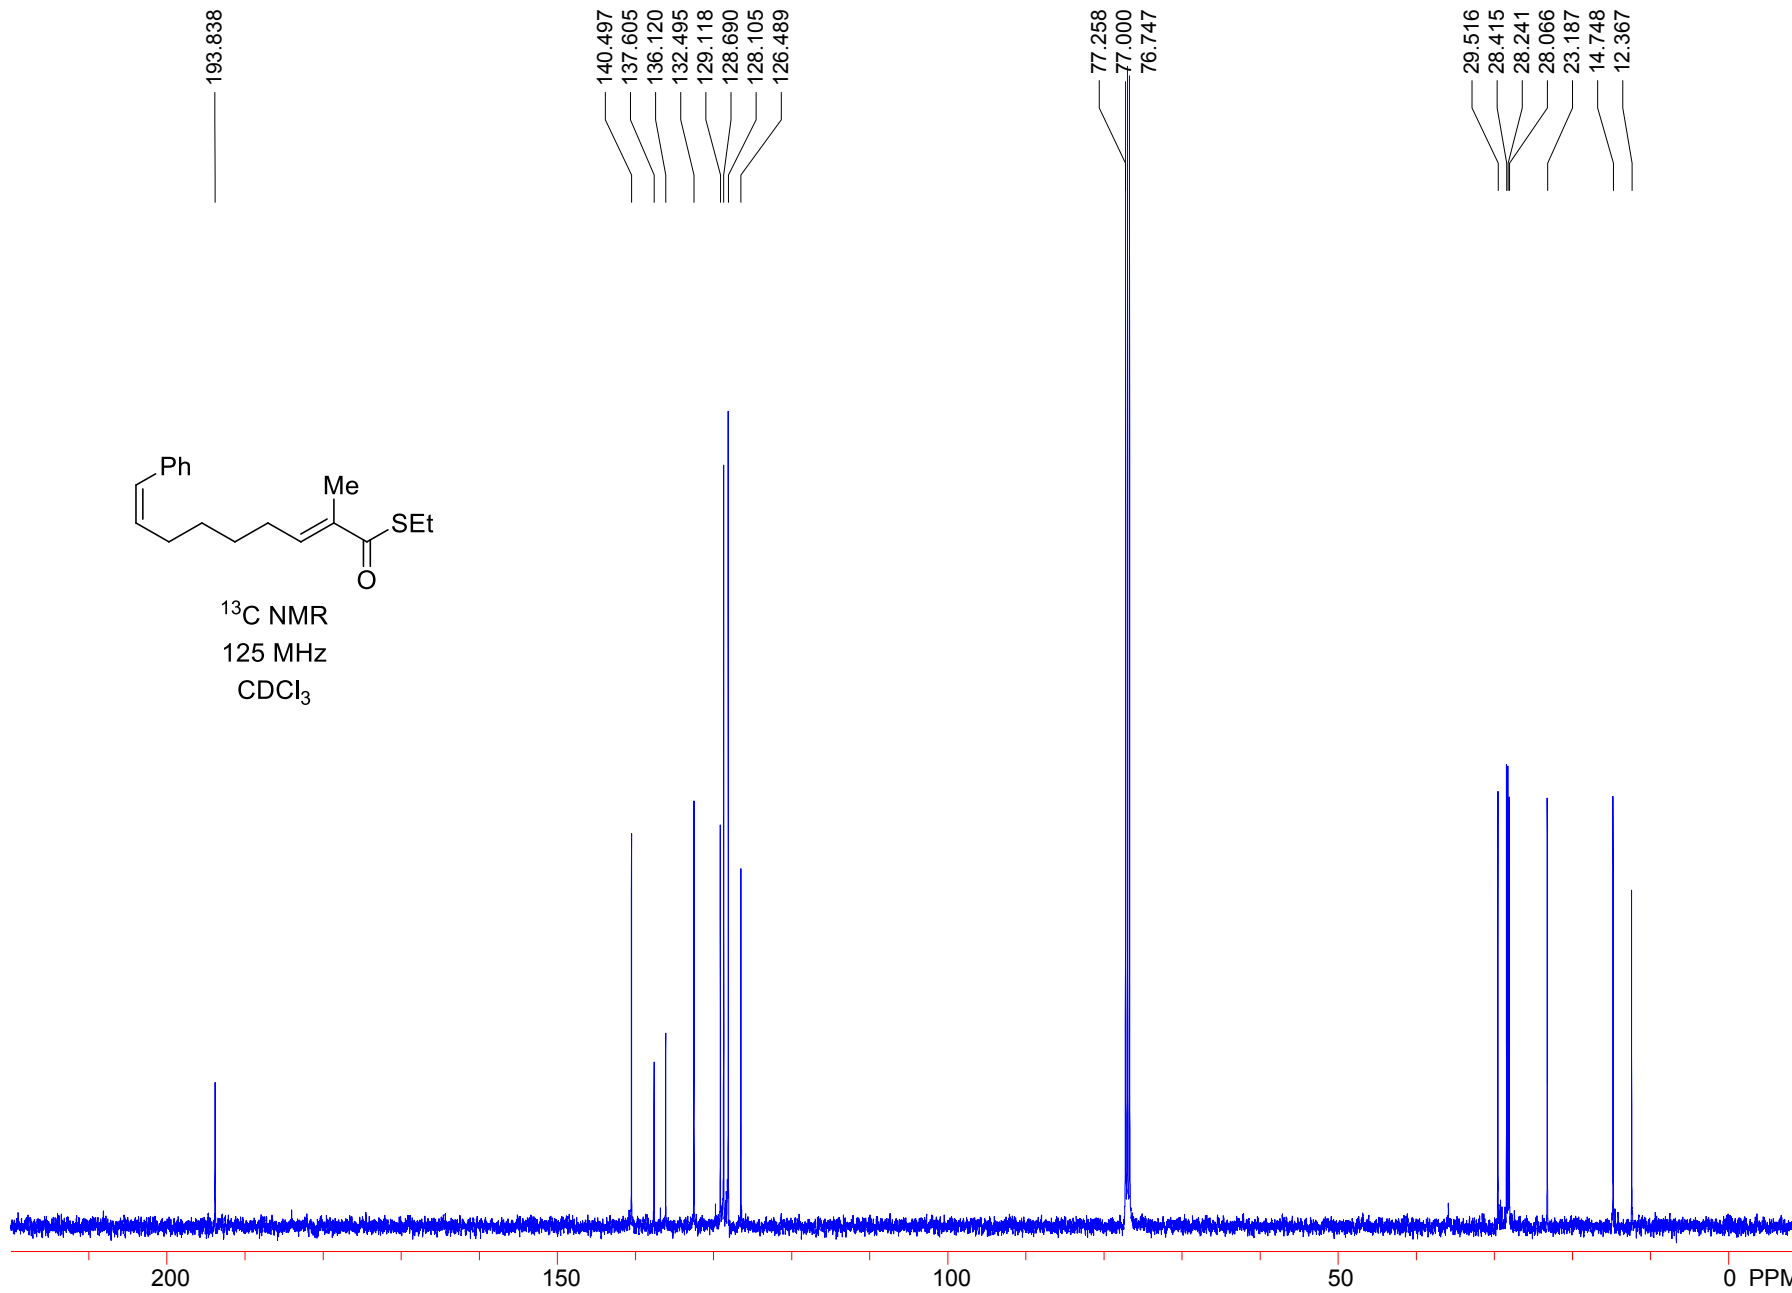



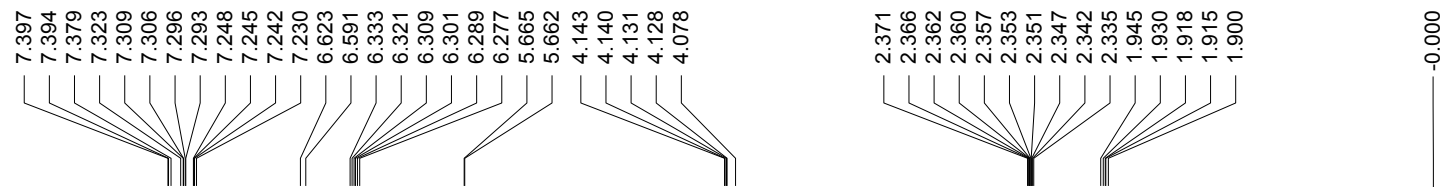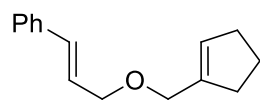

<sup>1</sup>H NMR  
500 MHz  
CDCl<sub>3</sub>

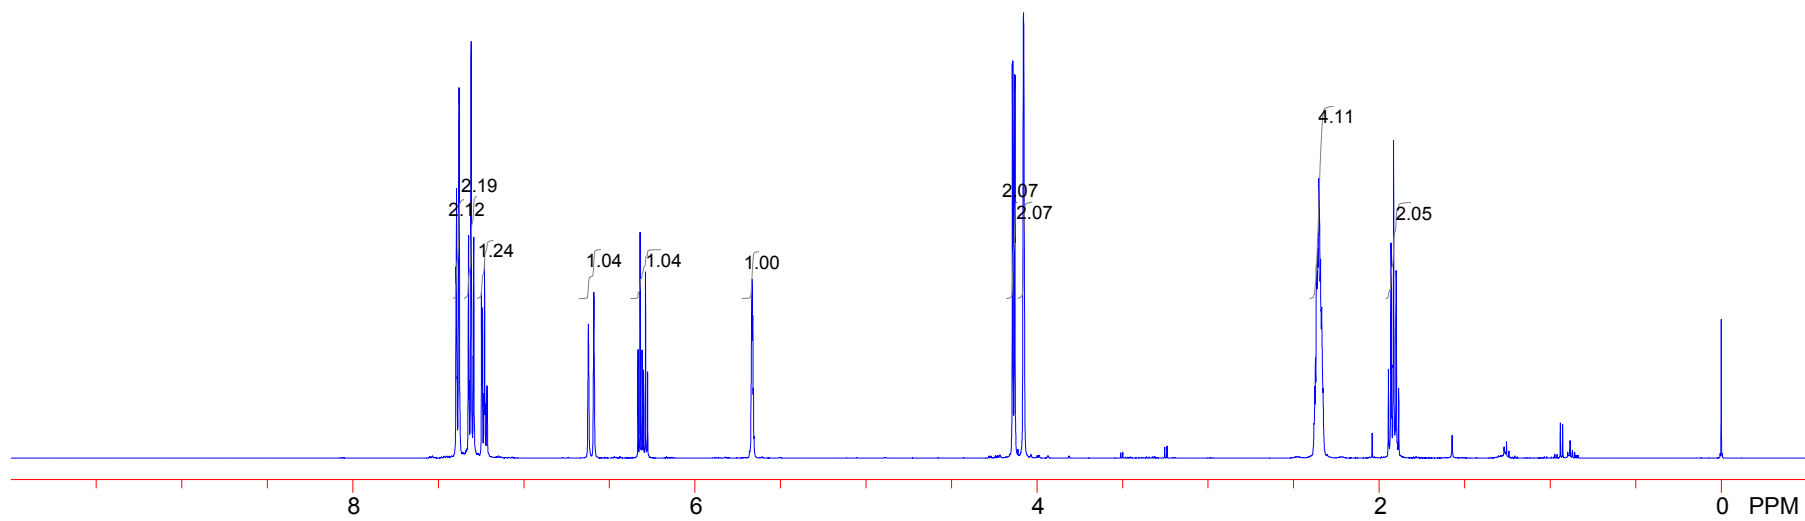

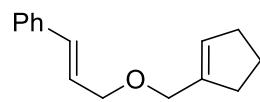

$^{13}\text{C}$  NMR  
125 MHz  
 $\text{CDCl}_3$

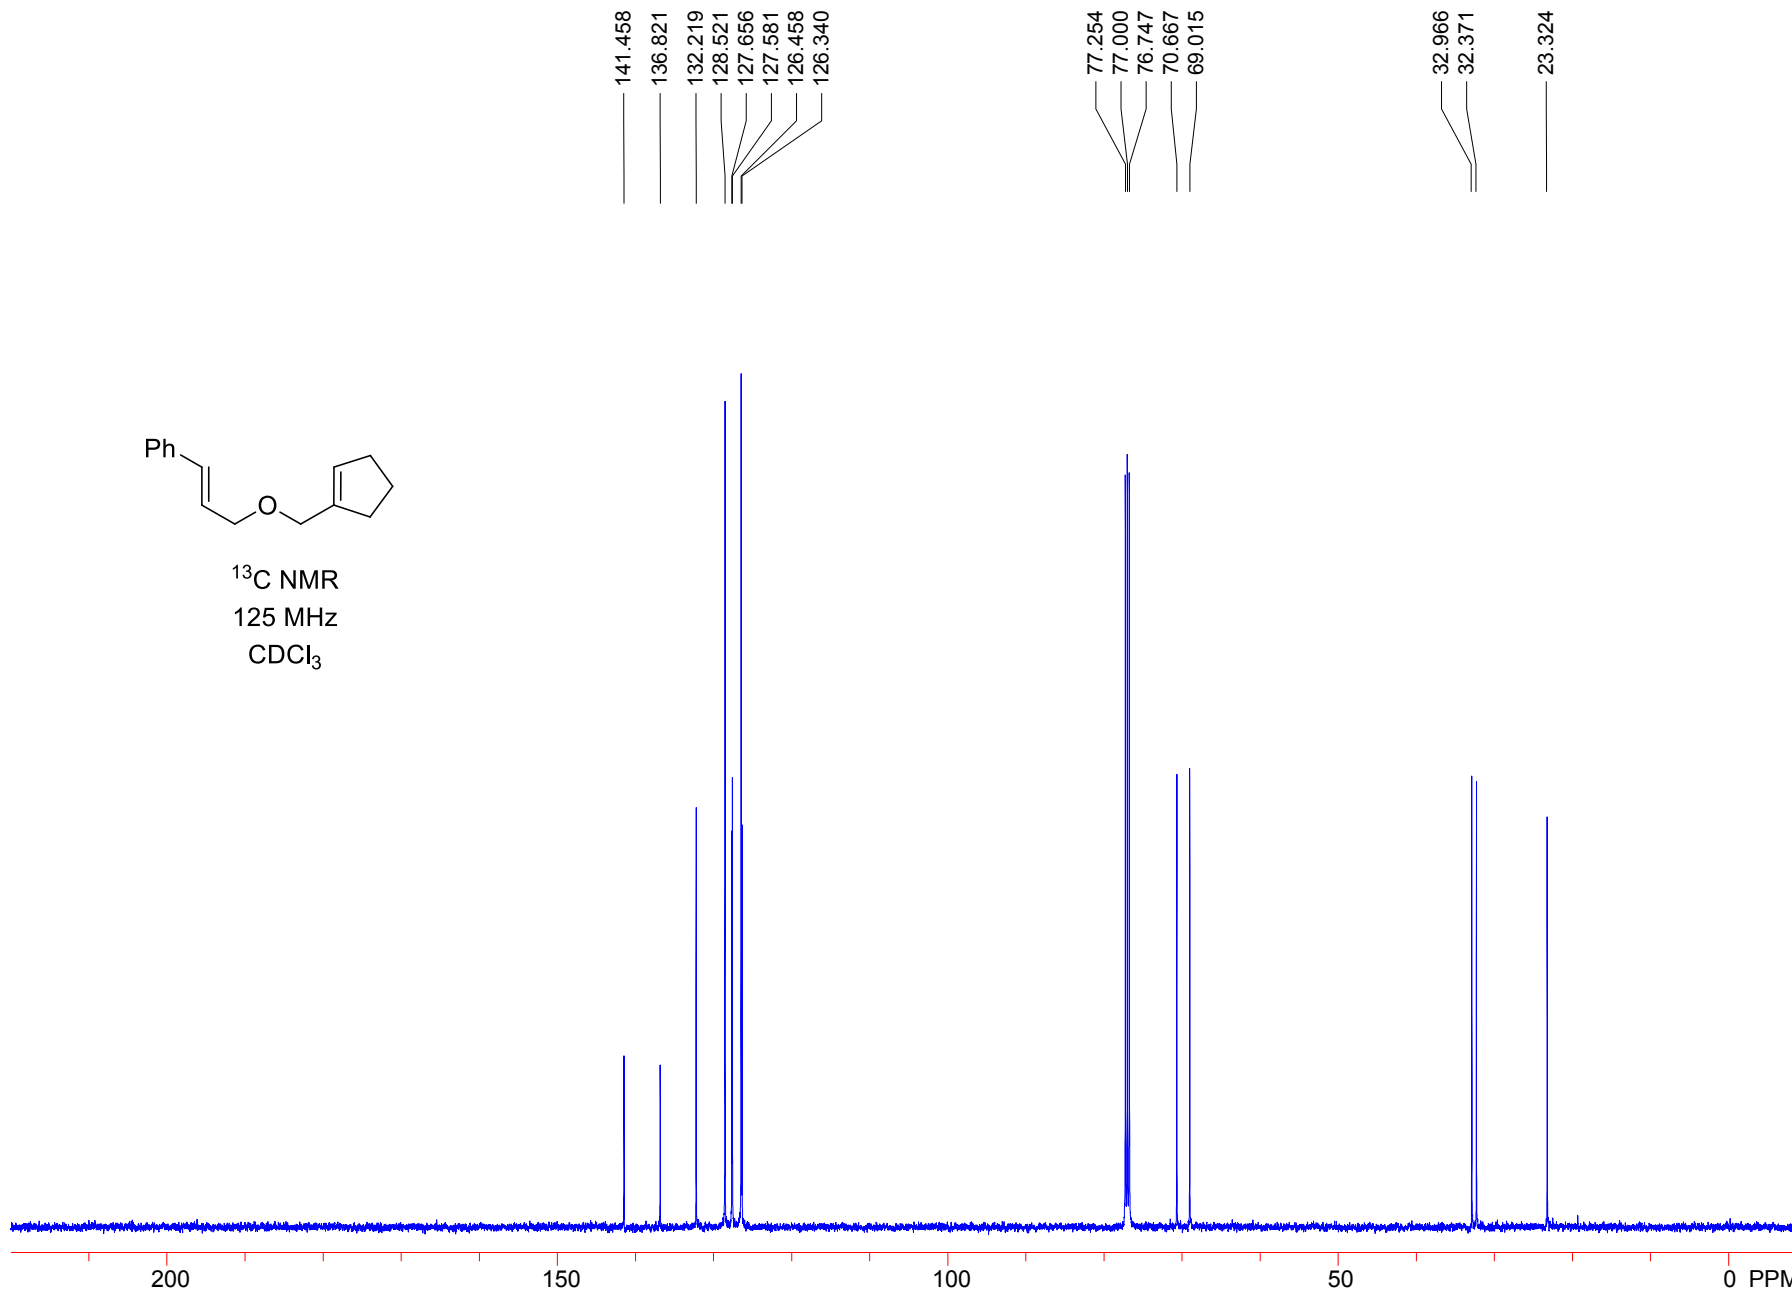

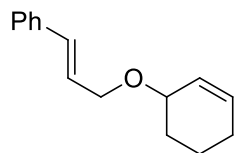

$^{13}\text{C}$  NMR  
125 MHz  
 $\text{CDCl}_3$

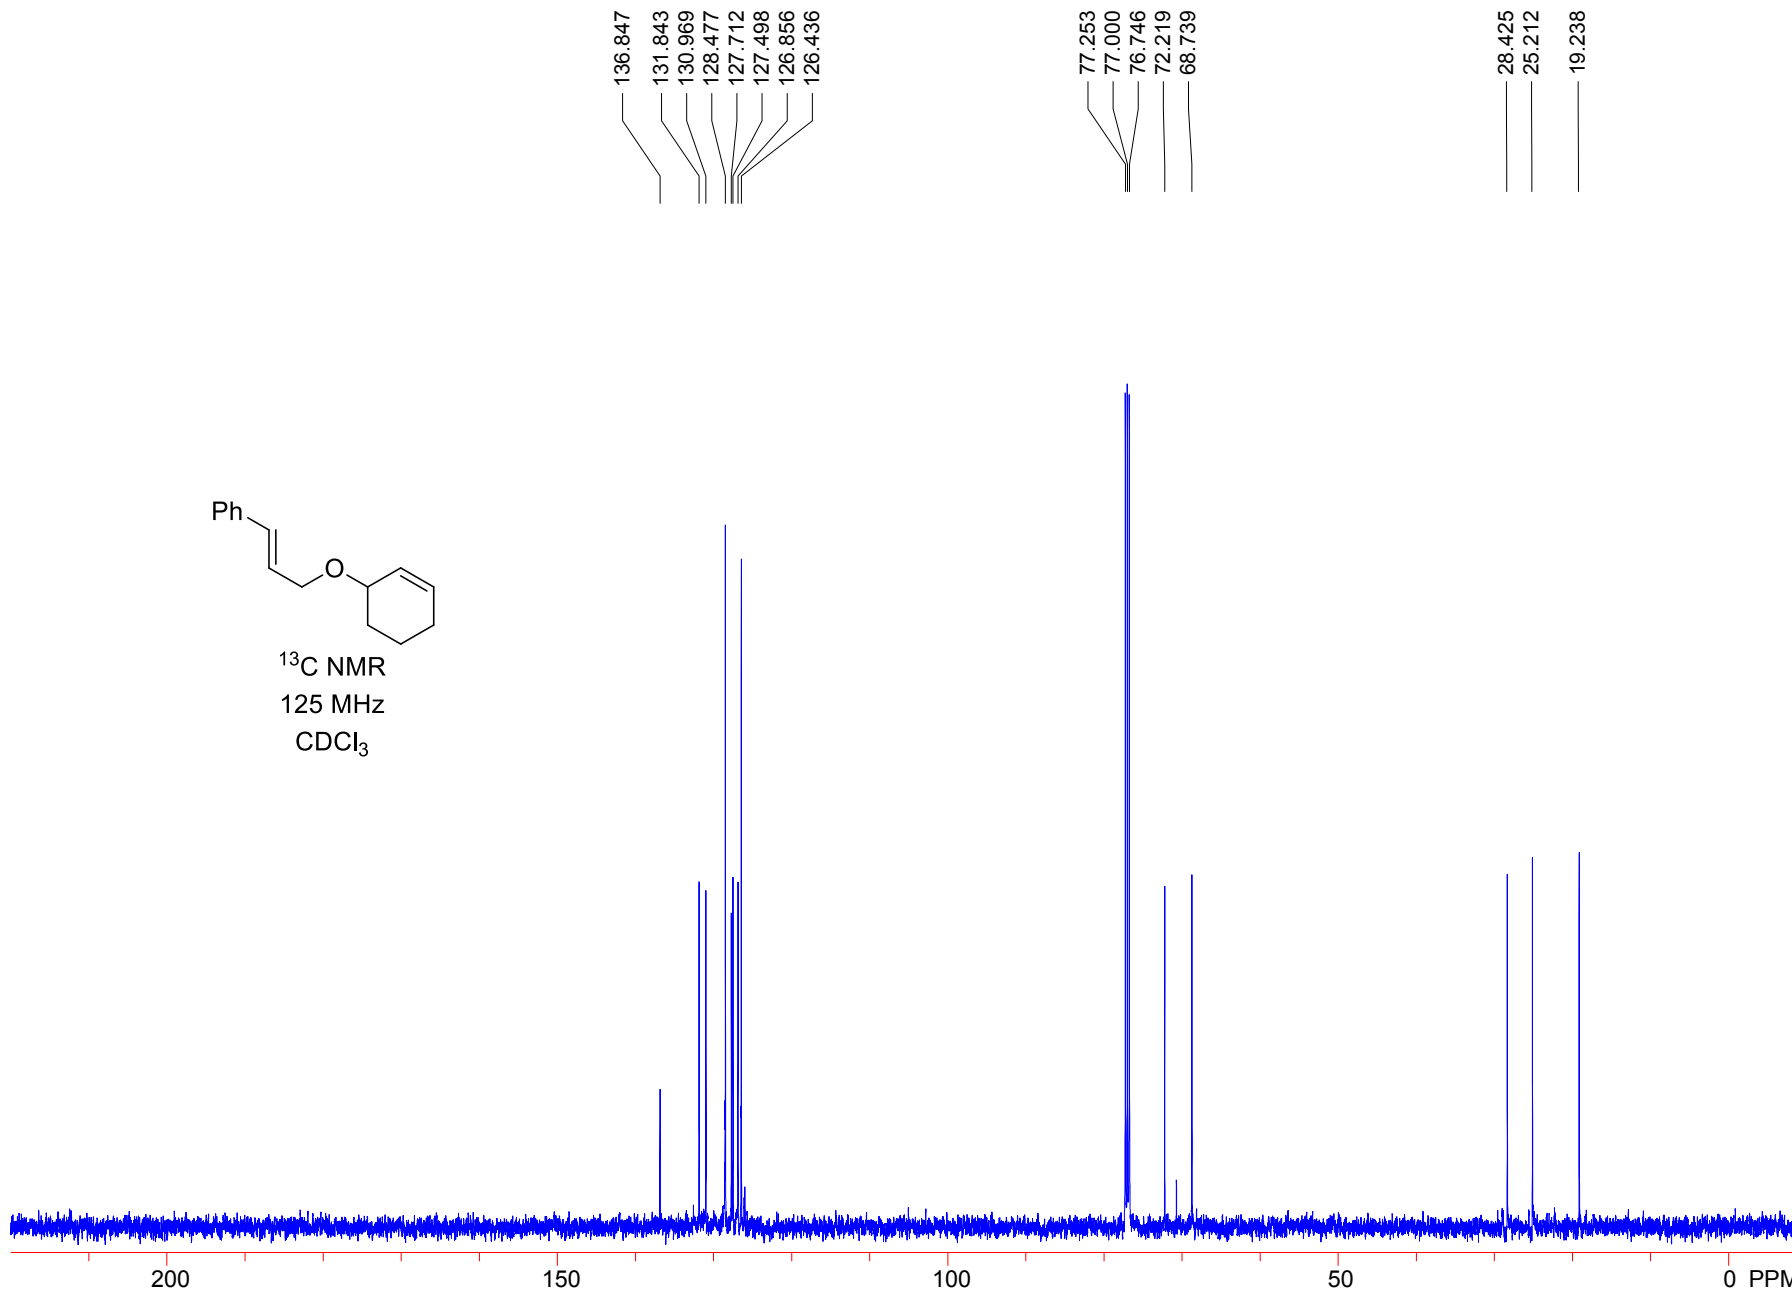

7.393  
7.378  
7.320  
7.305  
7.290  
7.240  
7.226  
7.211  
6.629  
6.597  
6.346  
6.334  
6.322  
6.314  
6.302  
6.290  
5.890  
5.867  
5.860  
5.827  
5.821  
5.807  
5.801  
4.259  
4.256  
4.247  
4.244  
4.234  
4.231  
4.222  
4.219  
4.207  
4.204  
4.194  
4.191  
4.181  
4.178  
4.169  
4.166  
3.963  
2.049  
1.977  
1.850  
1.843  
1.781  
1.775  
1.742  
1.711  
1.572  
1.555

-0.000

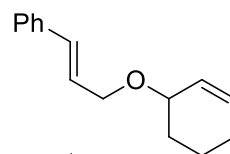

<sup>1</sup>H NMR  
500 MHz  
CDCl<sub>3</sub>

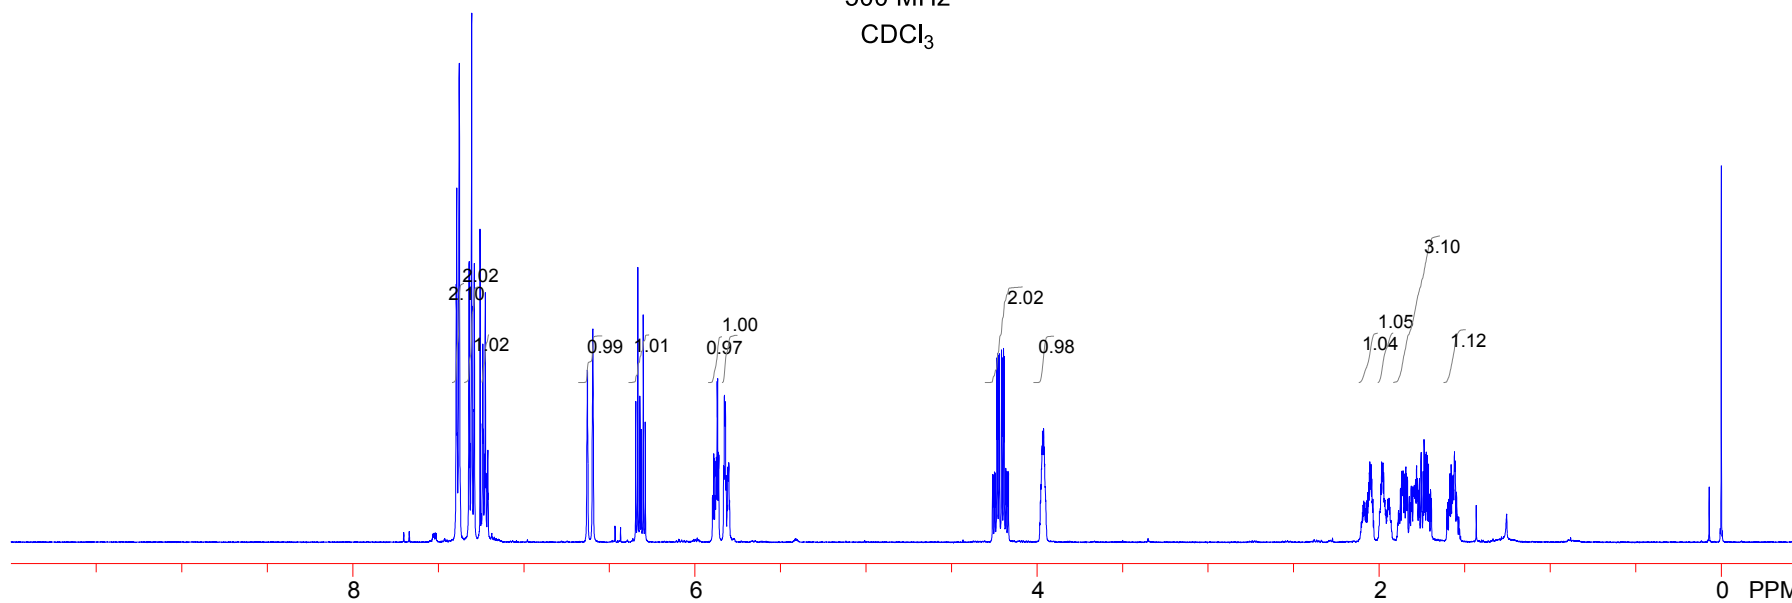

S-60

7.365  
7.351  
7.252  
7.249  
7.247  
7.234  
7.231  
7.220  
7.218  
7.198  
7.196  
7.182  
7.180  
7.166  
7.166  
6.625  
6.614  
6.302  
6.291  
5.807  
5.799  
5.786  
5.773  
5.765  
5.752  
4.992  
4.989  
4.961  
4.958  
4.954  
4.951  
4.921  
4.919  
4.918  
4.917  
4.903  
4.900  
4.899  
4.898  
4.896  
4.894  
2.183  
2.181  
2.178  
2.174  
2.171  
2.169  
2.166  
2.162  
2.159  
2.103  
2.100  
2.094  
2.090  
2.077  
1.939  
1.930  
1.908  
1.898  
1.894  
1.889  
1.885  
1.881  
1.878  
1.874  
0.000

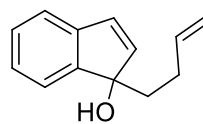

<sup>1</sup>H NMR  
500 MHz  
CDCl<sub>3</sub>

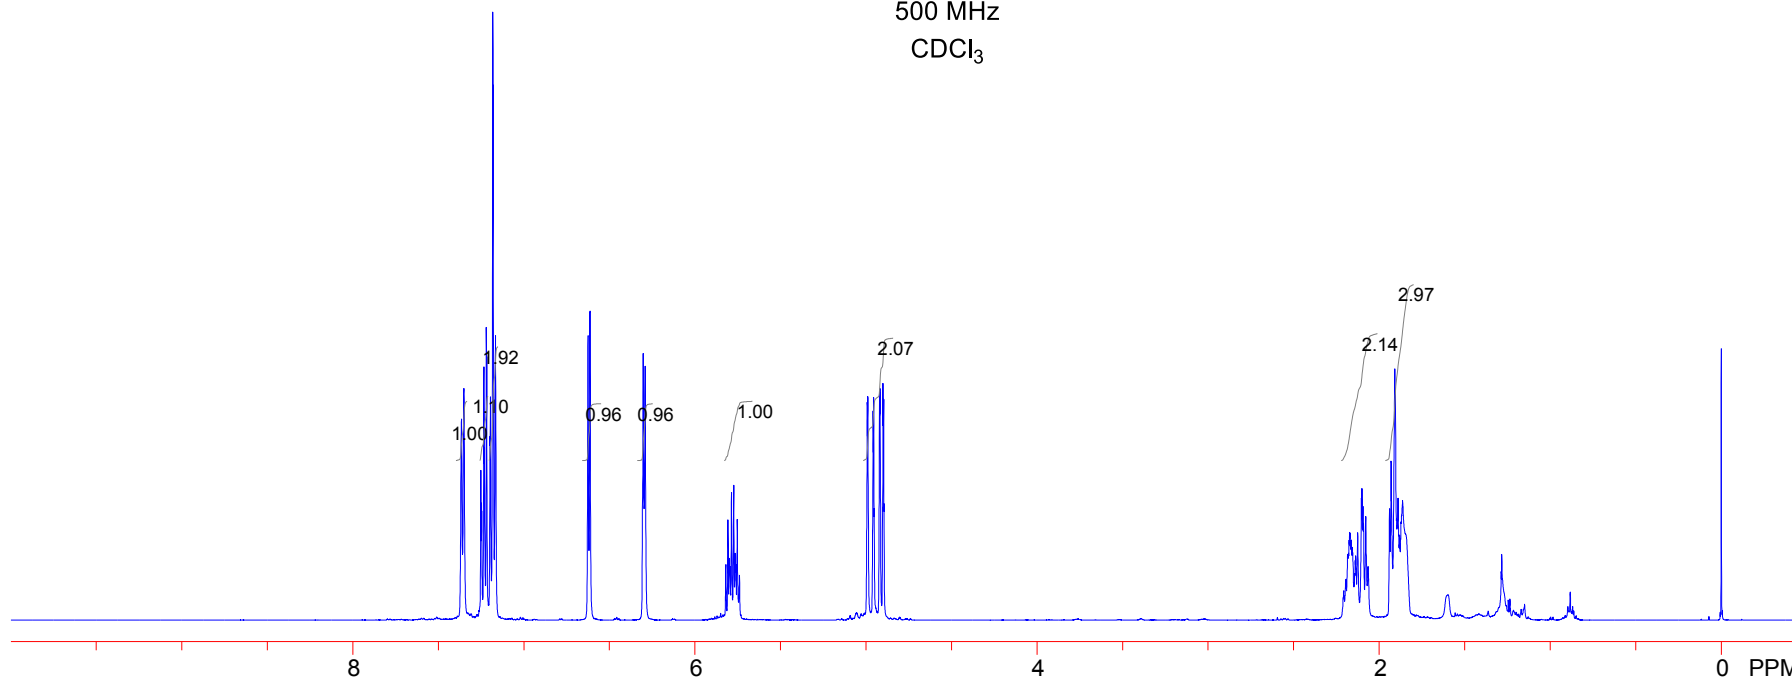

S-61

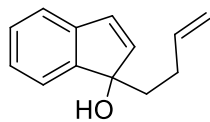

<sup>13</sup>C NMR  
125 MHz  
CDCl<sub>3</sub>

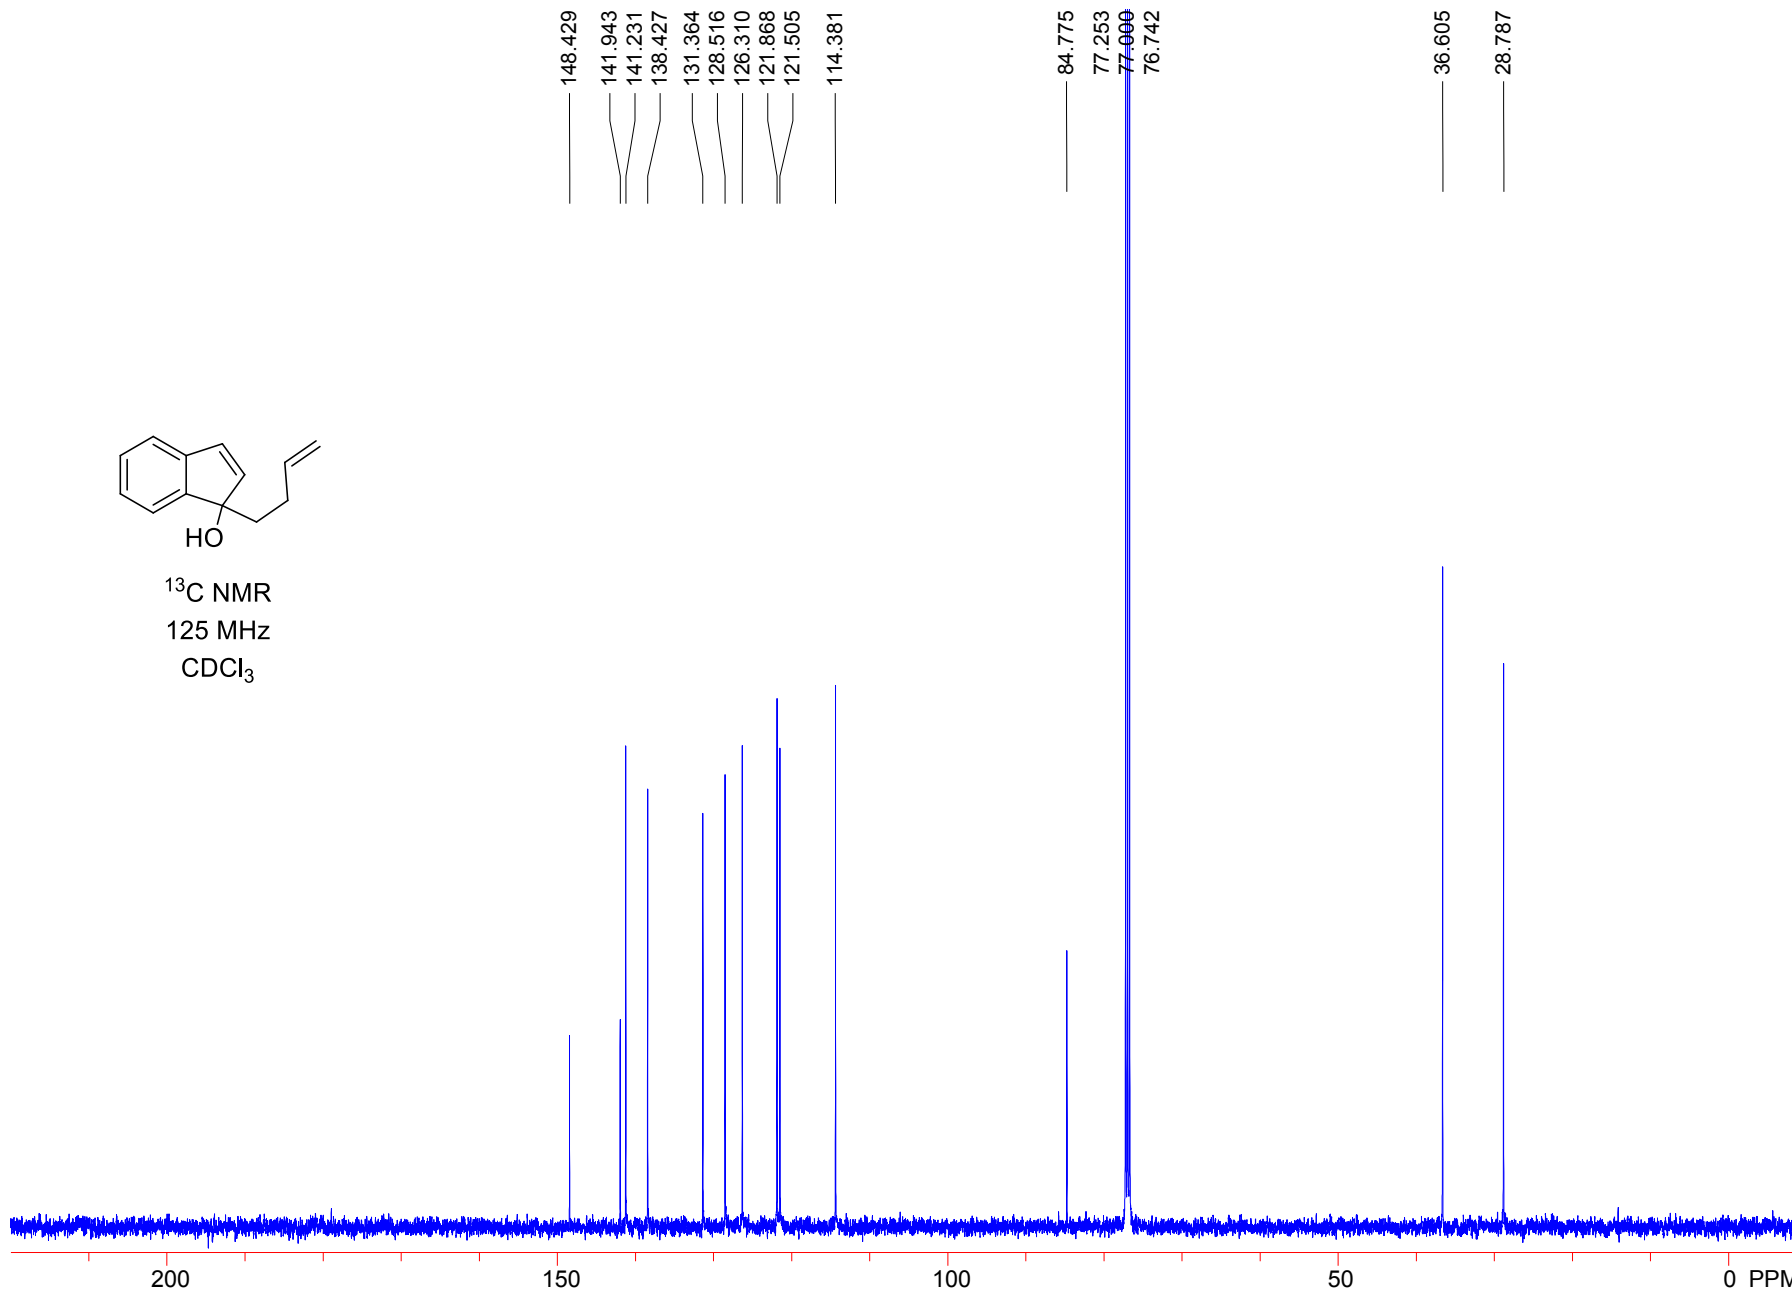

7.318  
7.314  
7.302  
7.290  
7.287  
7.253  
7.214  
7.212  
7.209  
7.197  
7.182  
7.150  
7.148  
7.147  
7.134  
7.133

4.181  
4.161  
3.796  
3.778  
3.528  
3.515  
3.508  
3.495  
3.456  
3.447  
3.438  
3.429  
3.295  
3.285  
3.279  
3.270  
3.264  
3.255  
2.997  
2.983  
2.416  
2.402  
2.400  
2.386  
1.110  
0.741

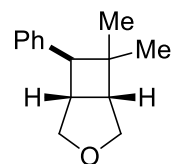

<sup>1</sup>H NMR  
500M Hz  
CDCl<sub>3</sub>

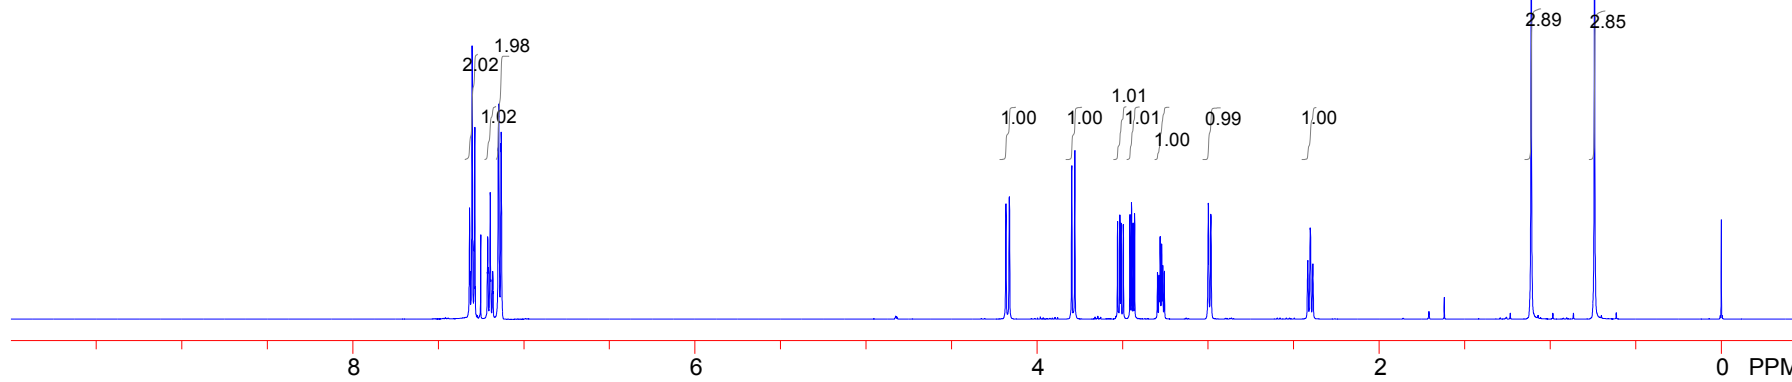

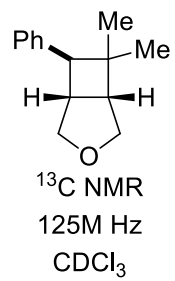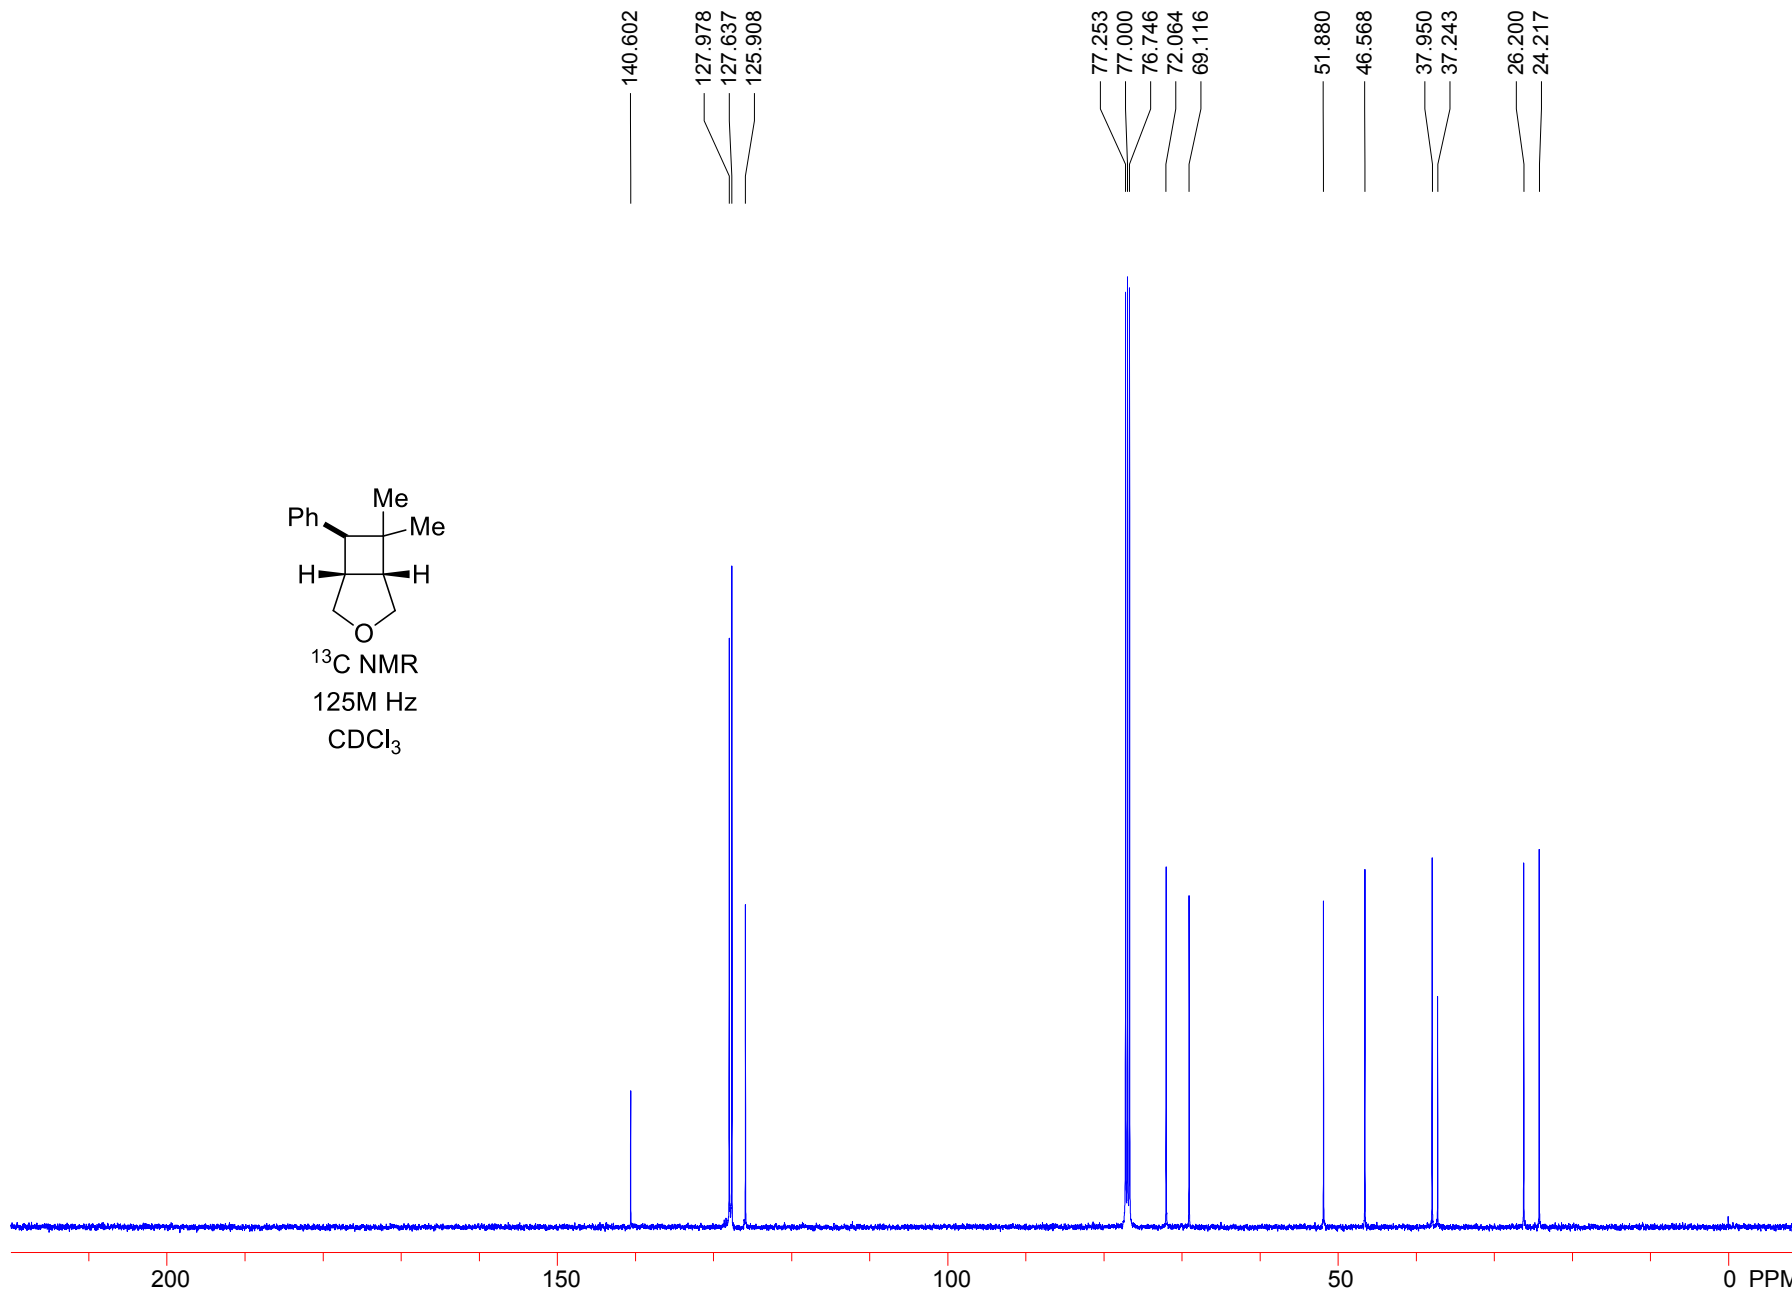



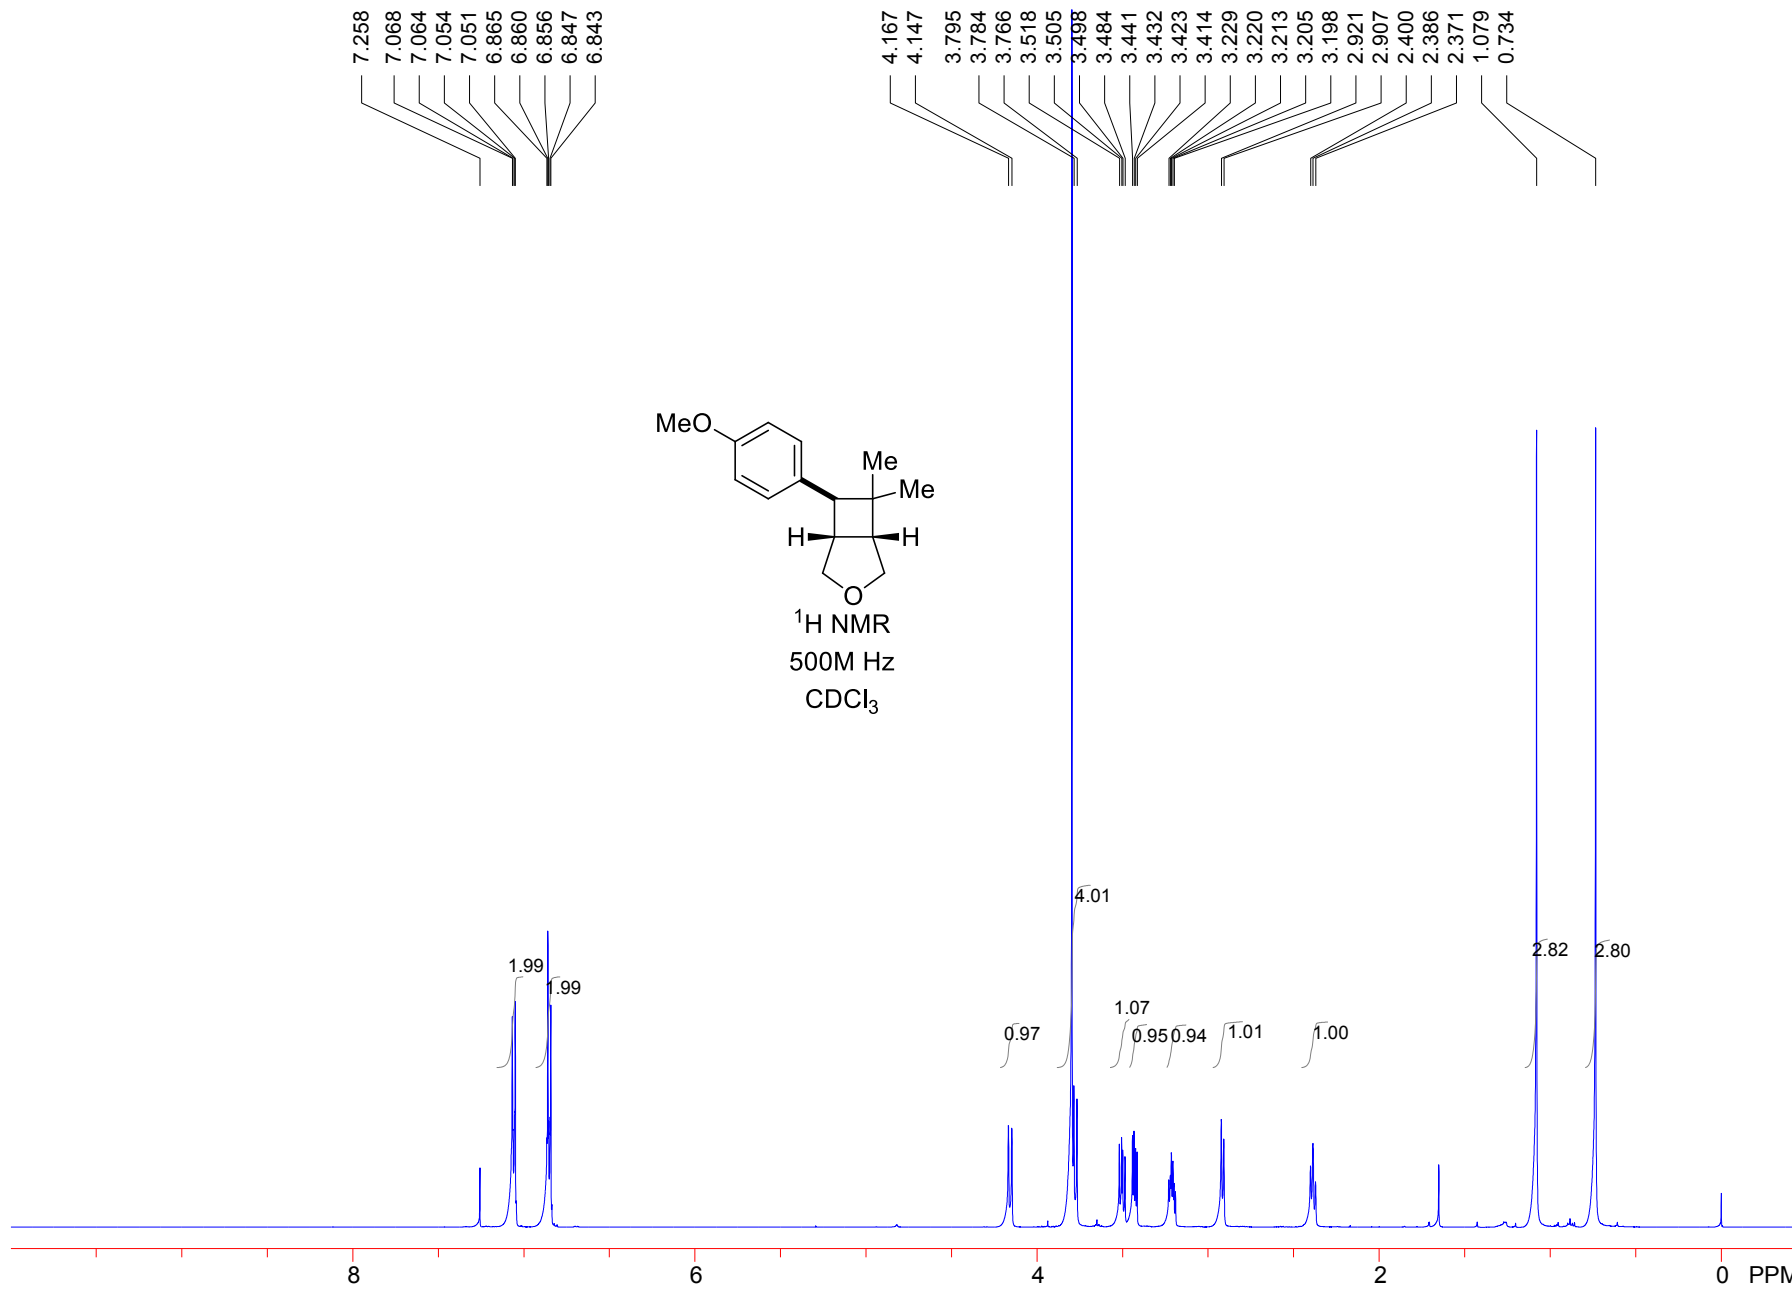

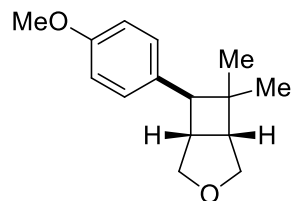

<sup>13</sup>C NMR  
125M Hz  
CDCl<sub>3</sub>

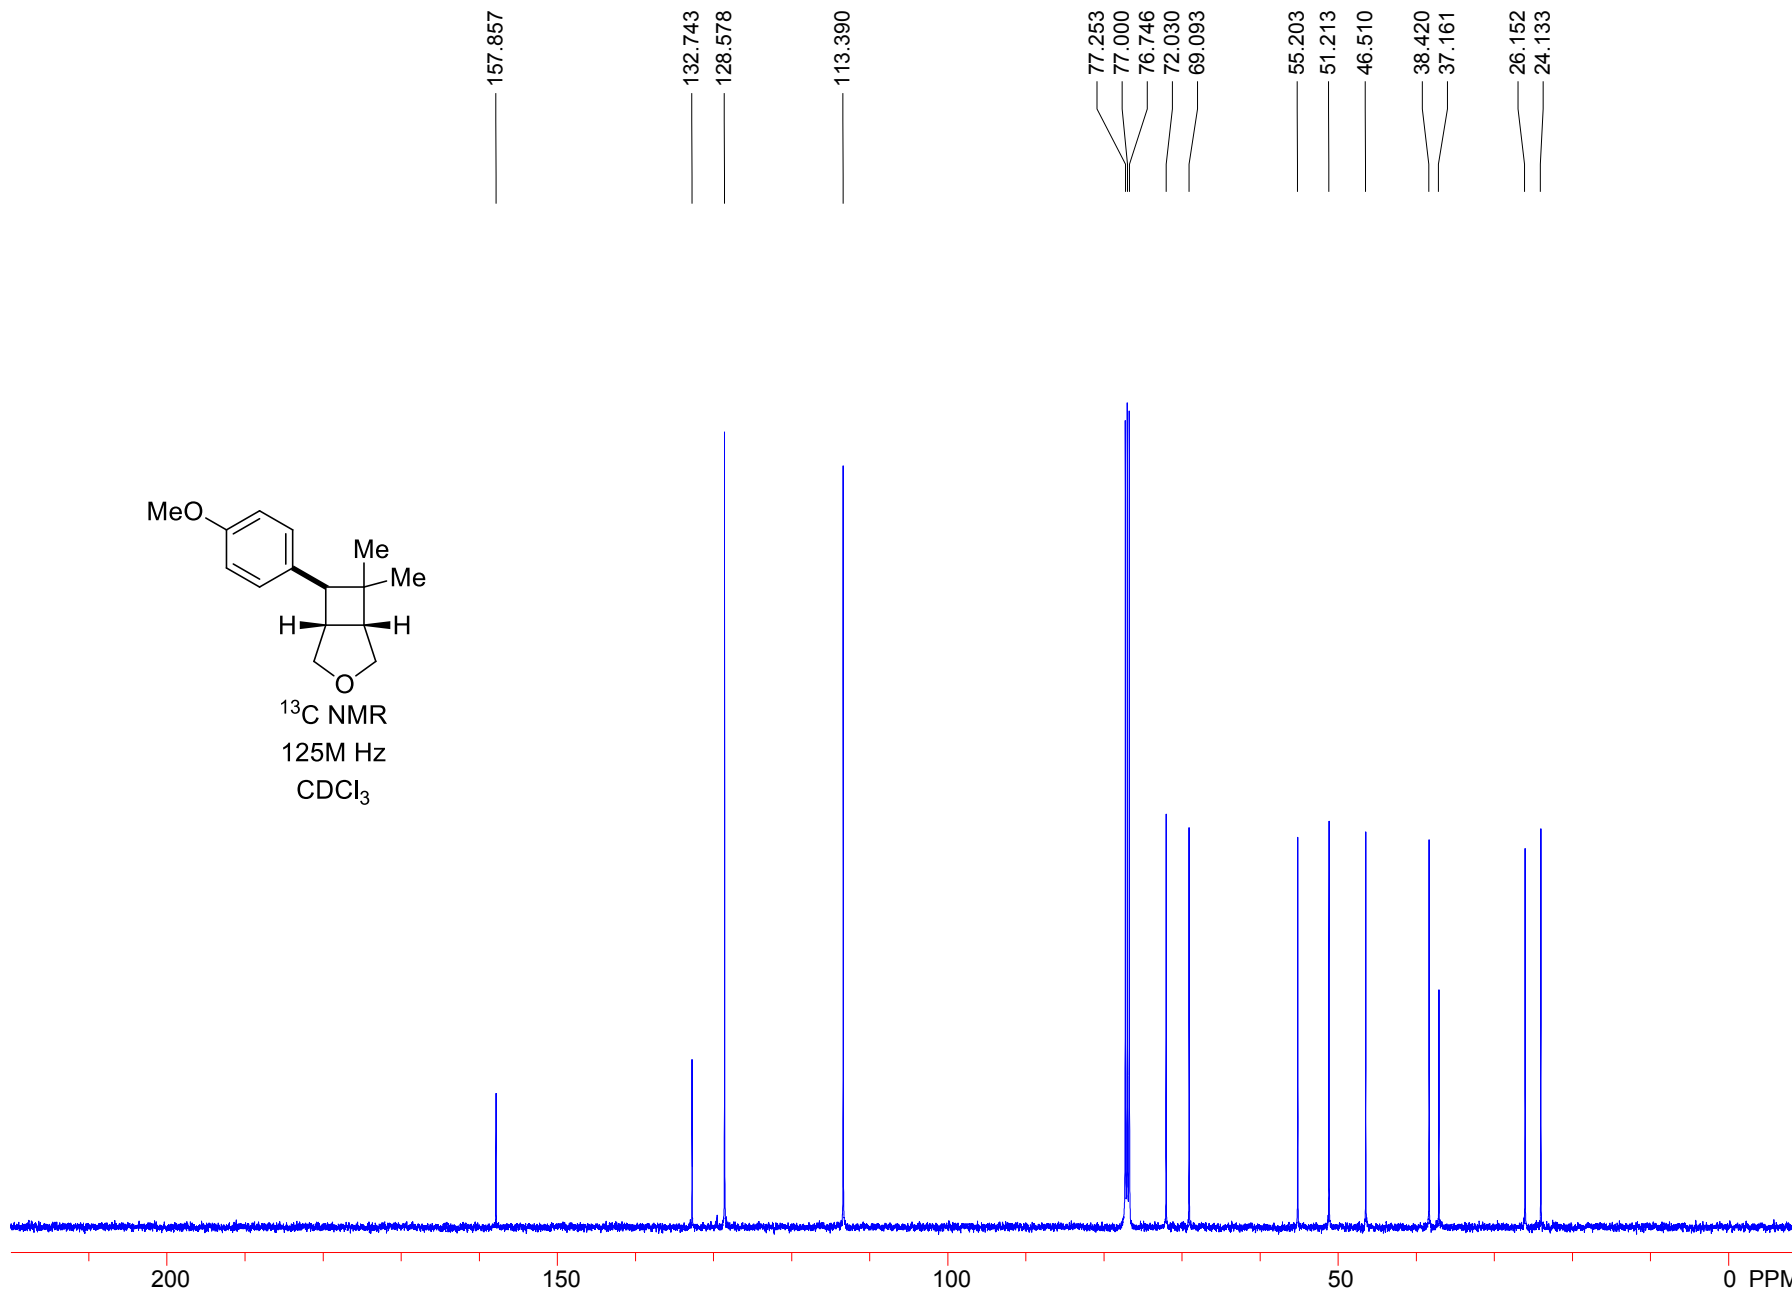

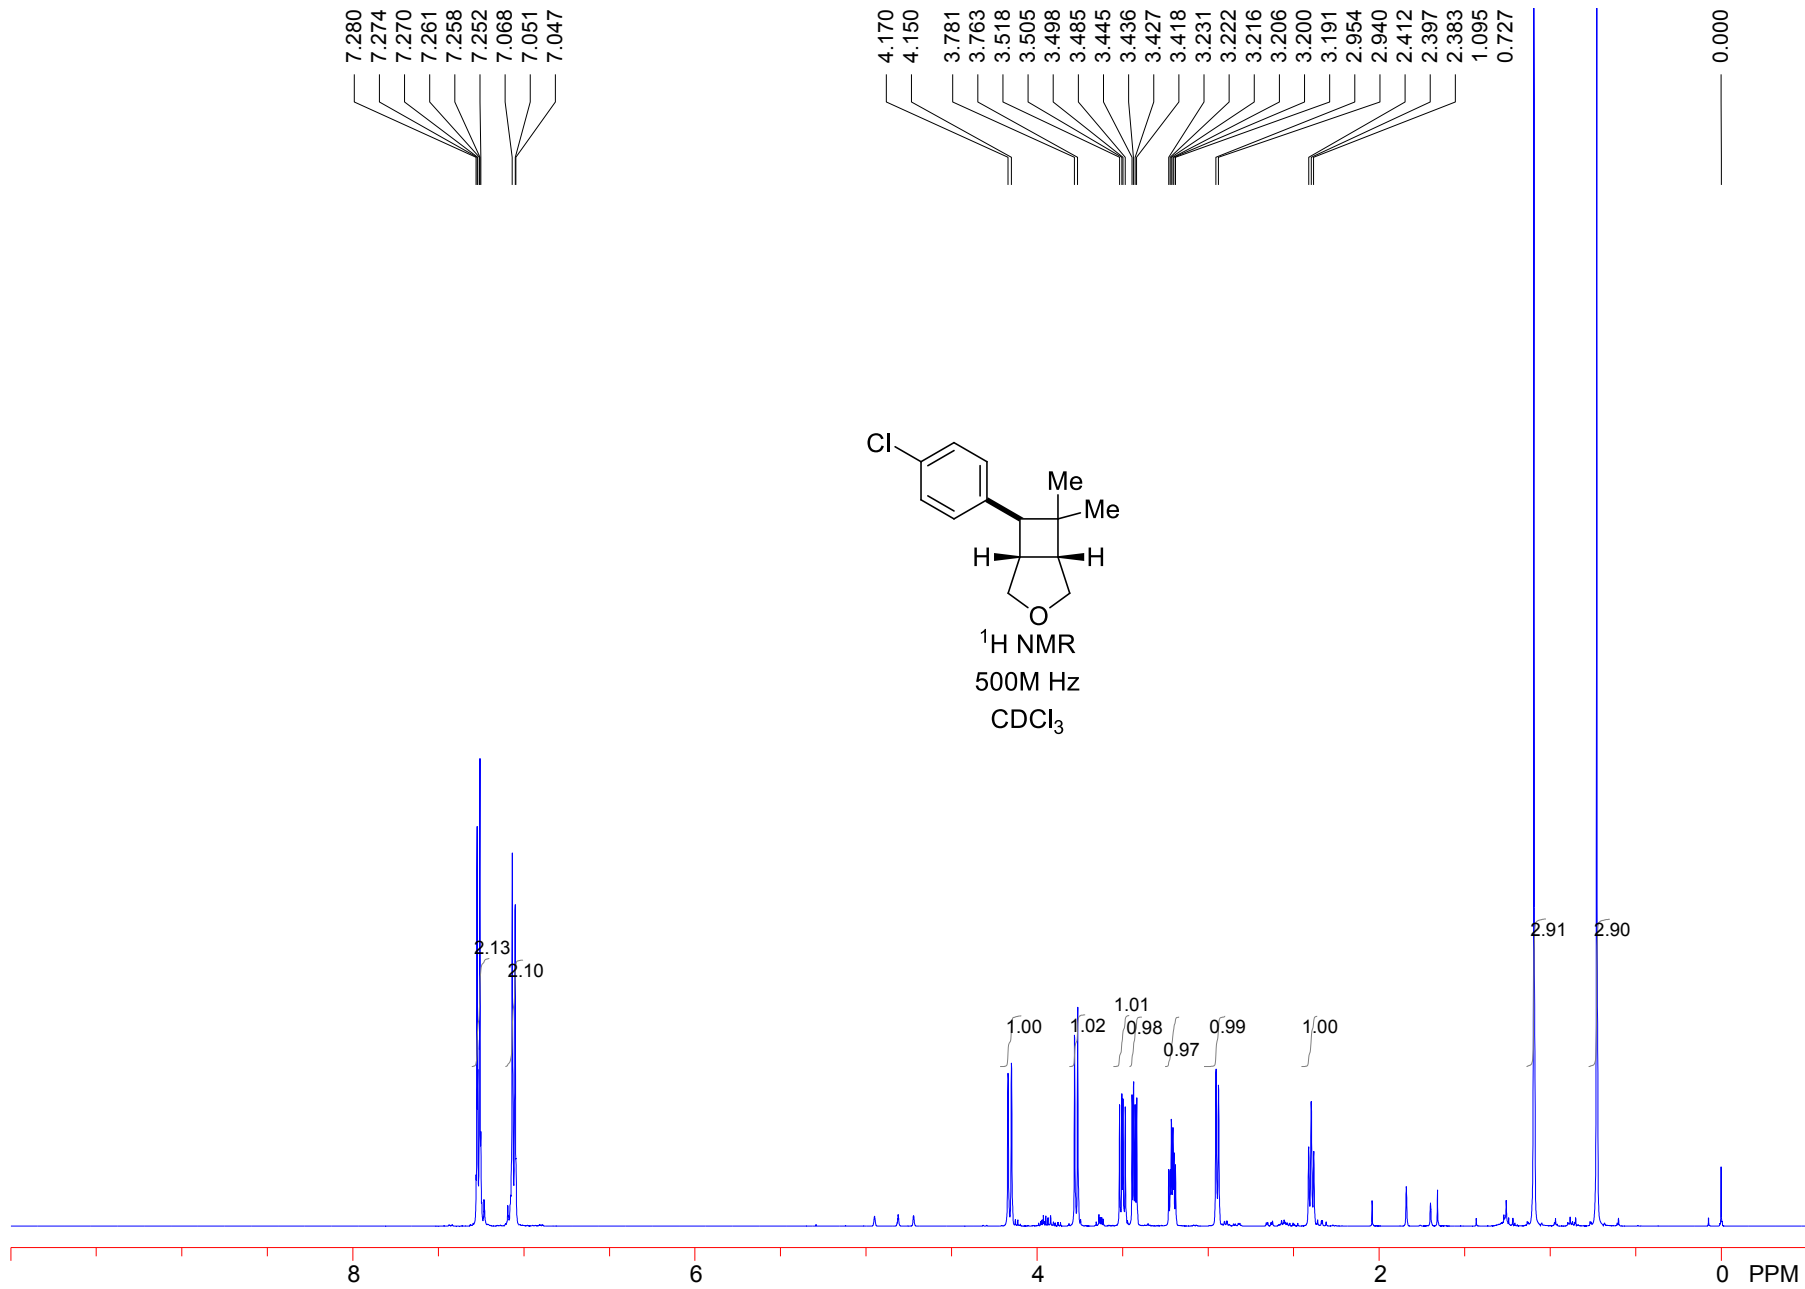

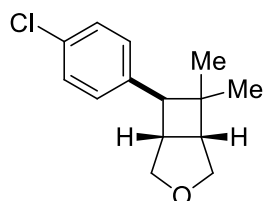

$^{13}\text{C}$  NMR  
125M Hz  
 $\text{CDCl}_3$

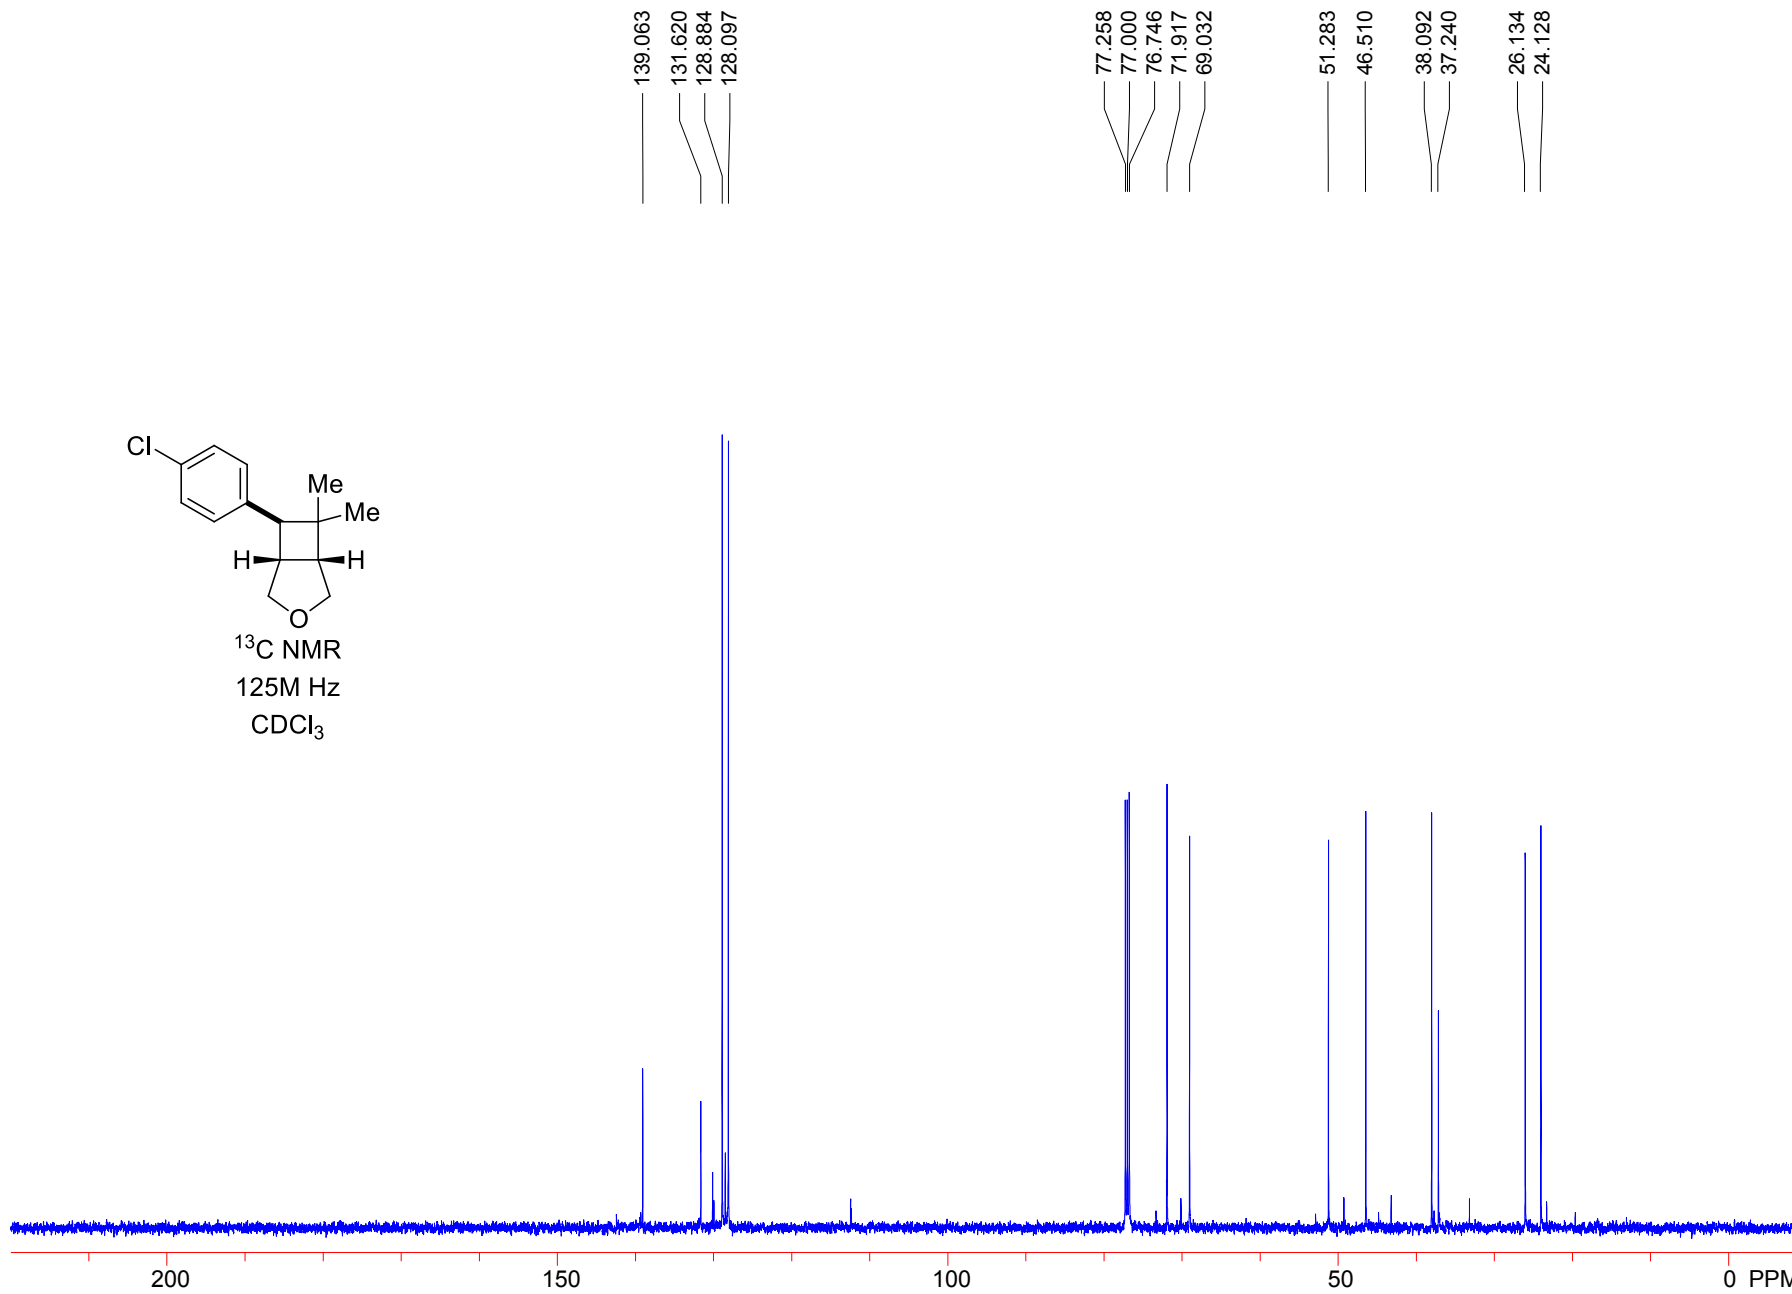

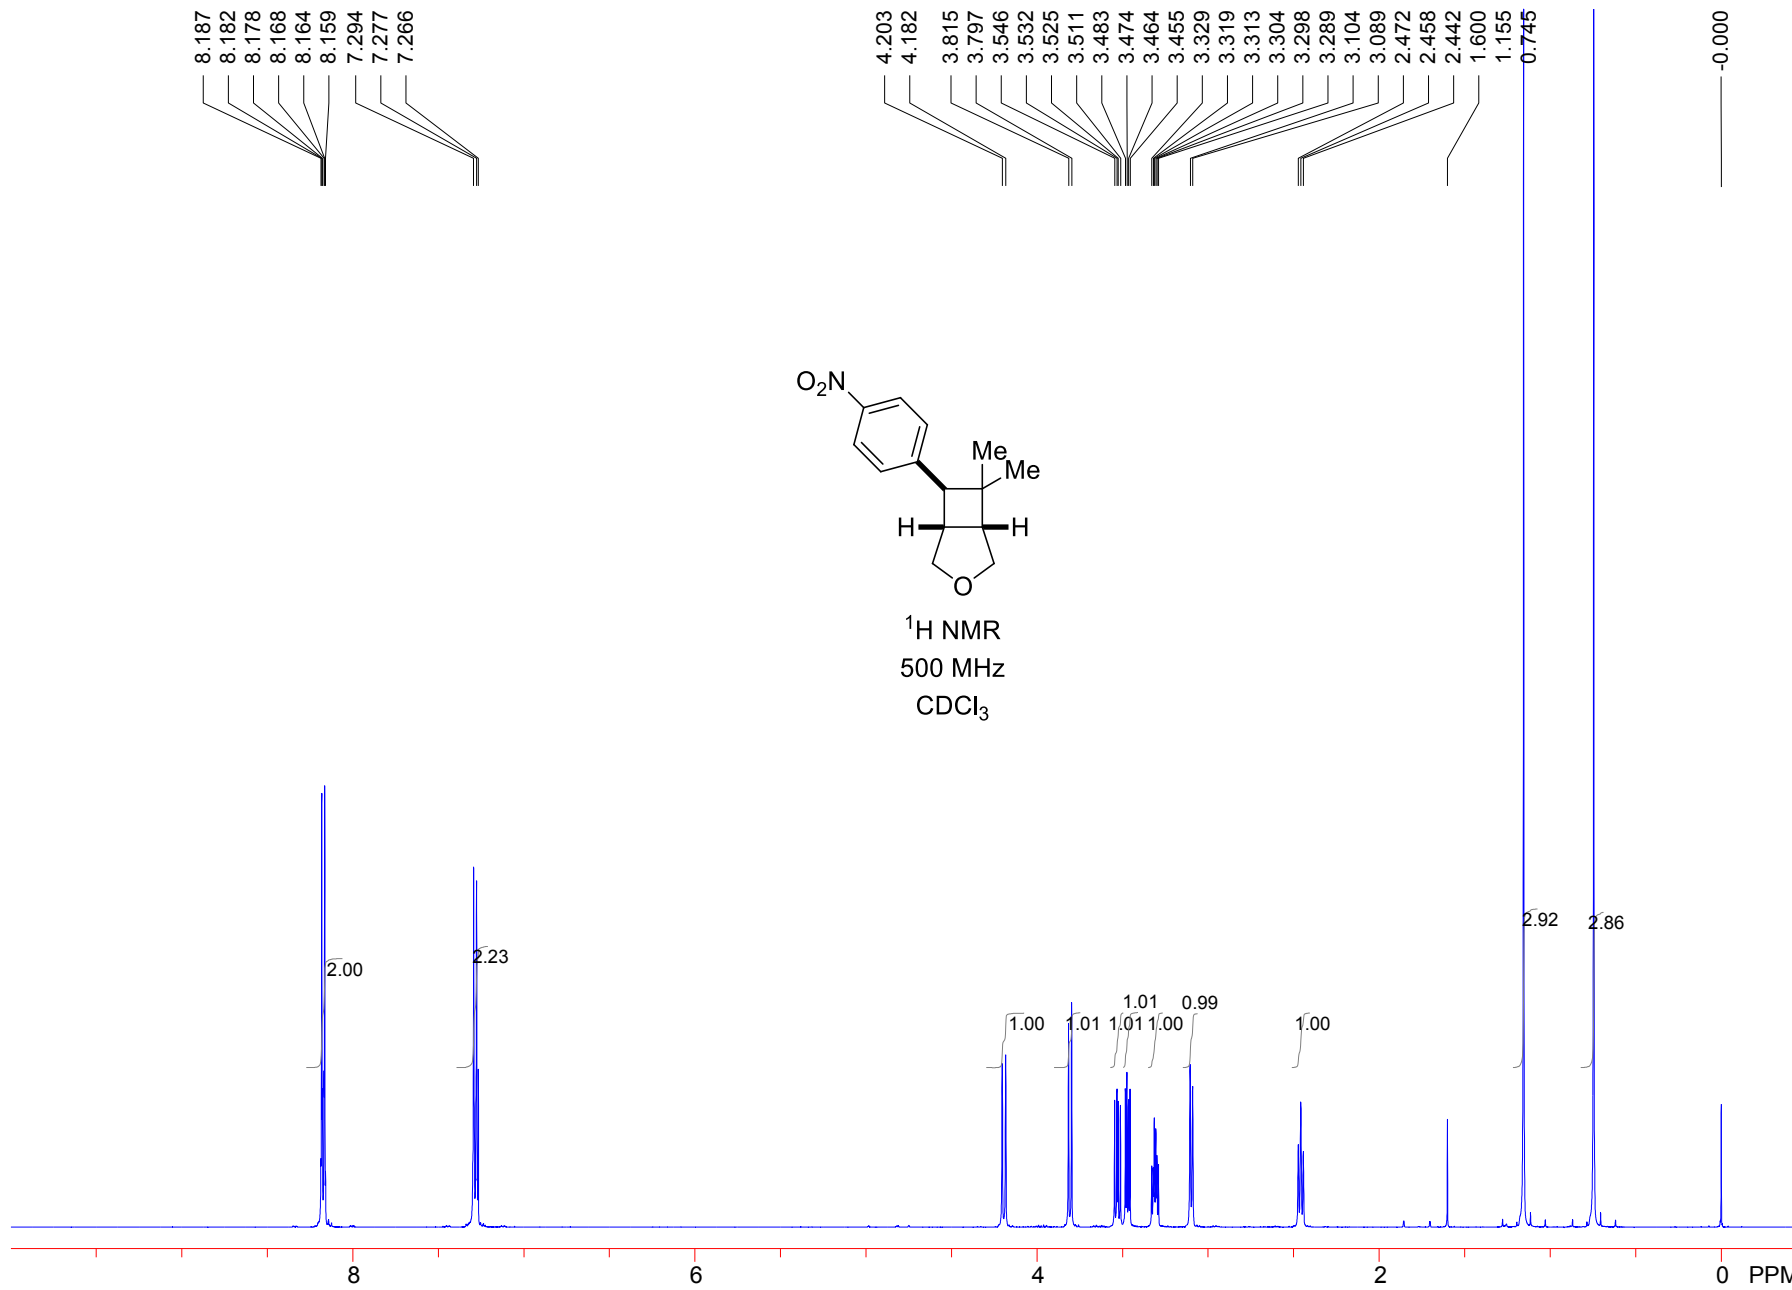

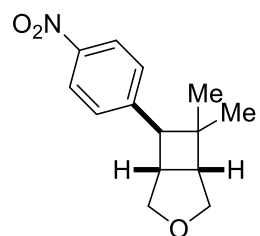

<sup>13</sup>C NMR  
125 MHz  
CDCl<sub>3</sub>

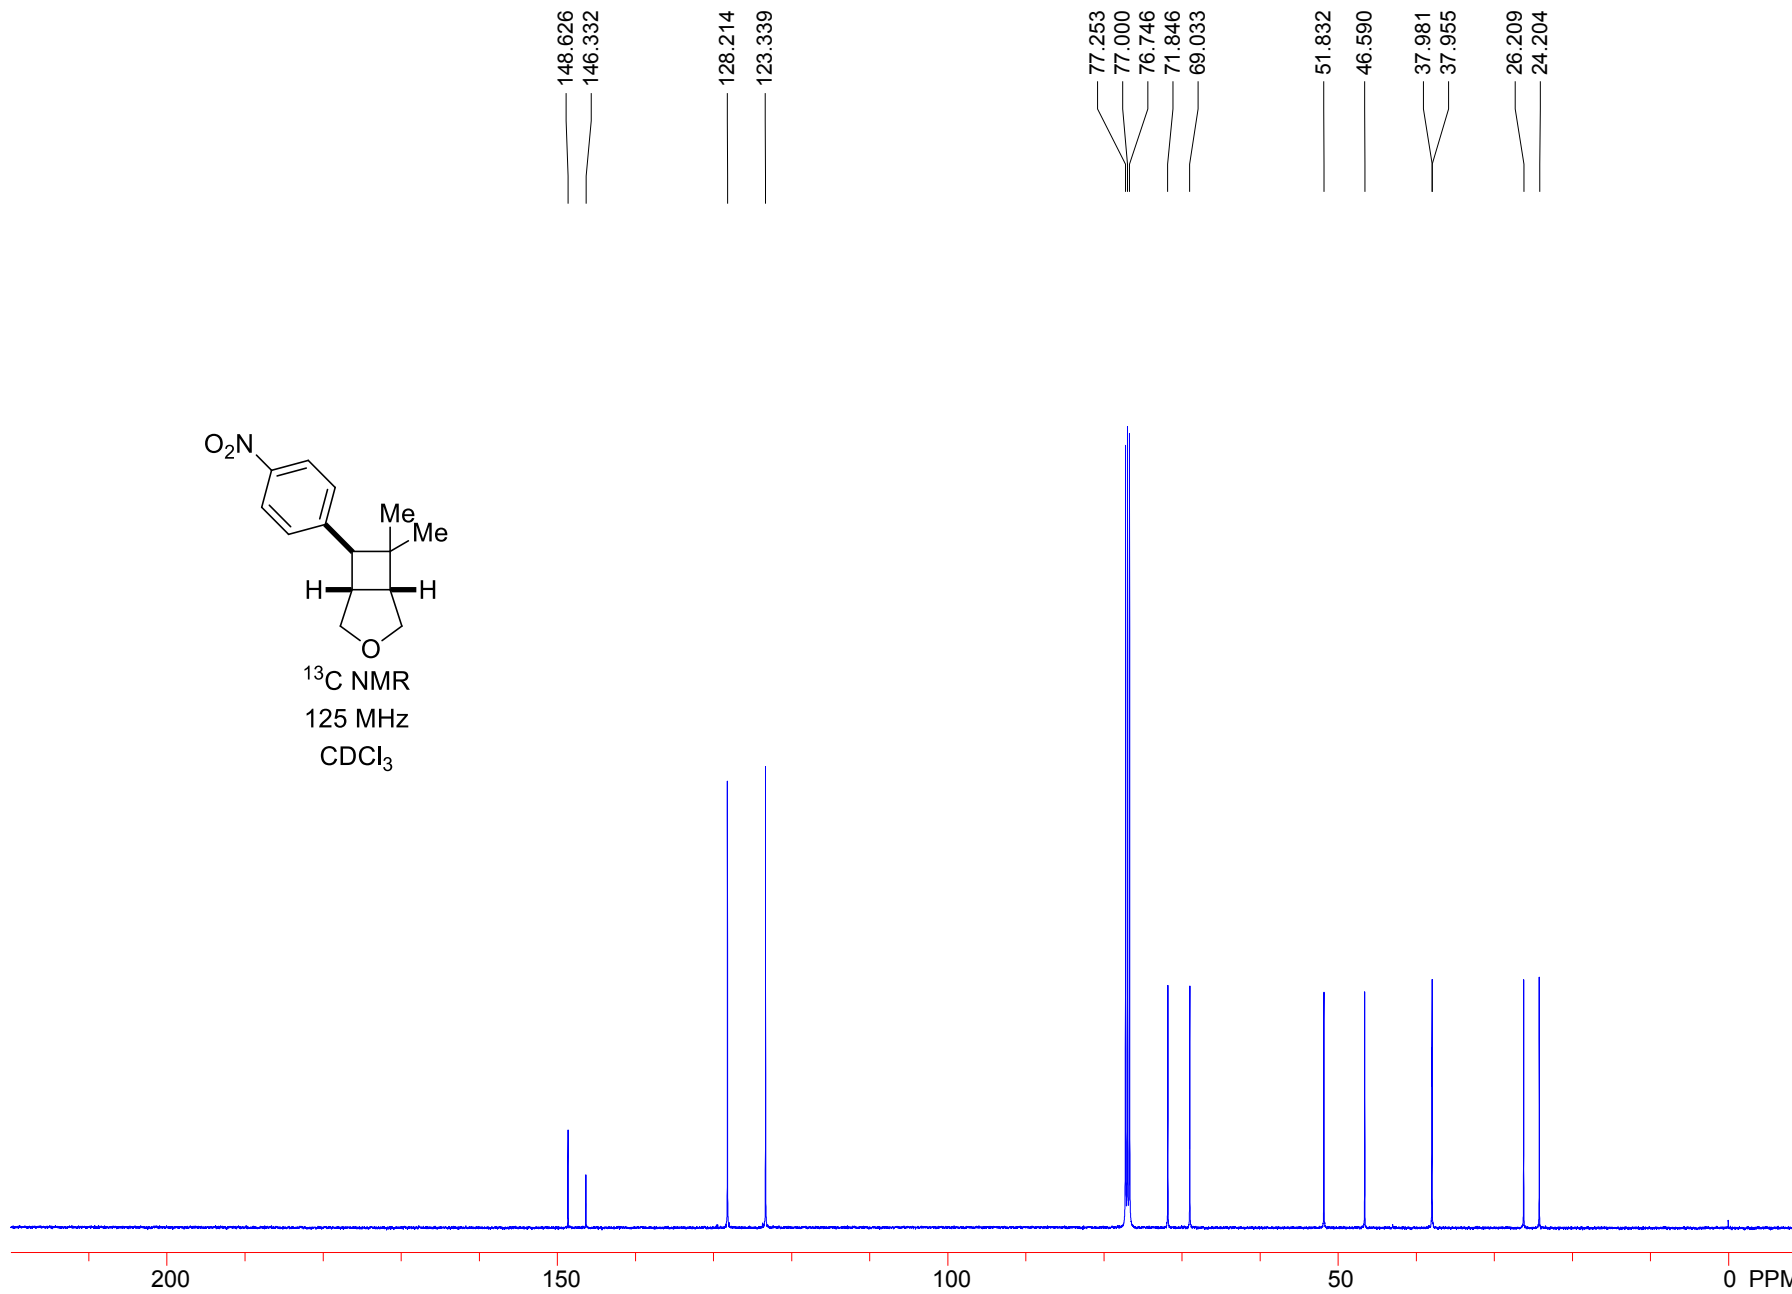

8.587  
8.585  
8.584  
8.582  
8.578  
8.576  
8.574  
8.572  
7.589  
7.584  
7.573  
7.569  
7.557  
7.554  
7.283  
7.111  
7.109  
7.101  
7.100  
7.096  
7.095  
7.087  
7.085  
7.035  
7.020

4.181  
4.161  
3.824  
3.806  
3.691  
3.682  
3.676  
3.675  
3.667  
3.666  
3.661  
3.651  
3.523  
3.510  
3.502  
3.490  
3.478  
3.469  
3.460  
3.451  
3.067  
3.053  
2.443  
2.429  
2.427  
2.413  
1.156  
0.737  
-0.000

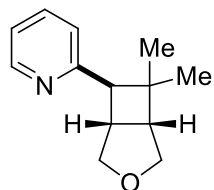

<sup>1</sup>H NMR  
500M Hz  
CDCl<sub>3</sub>

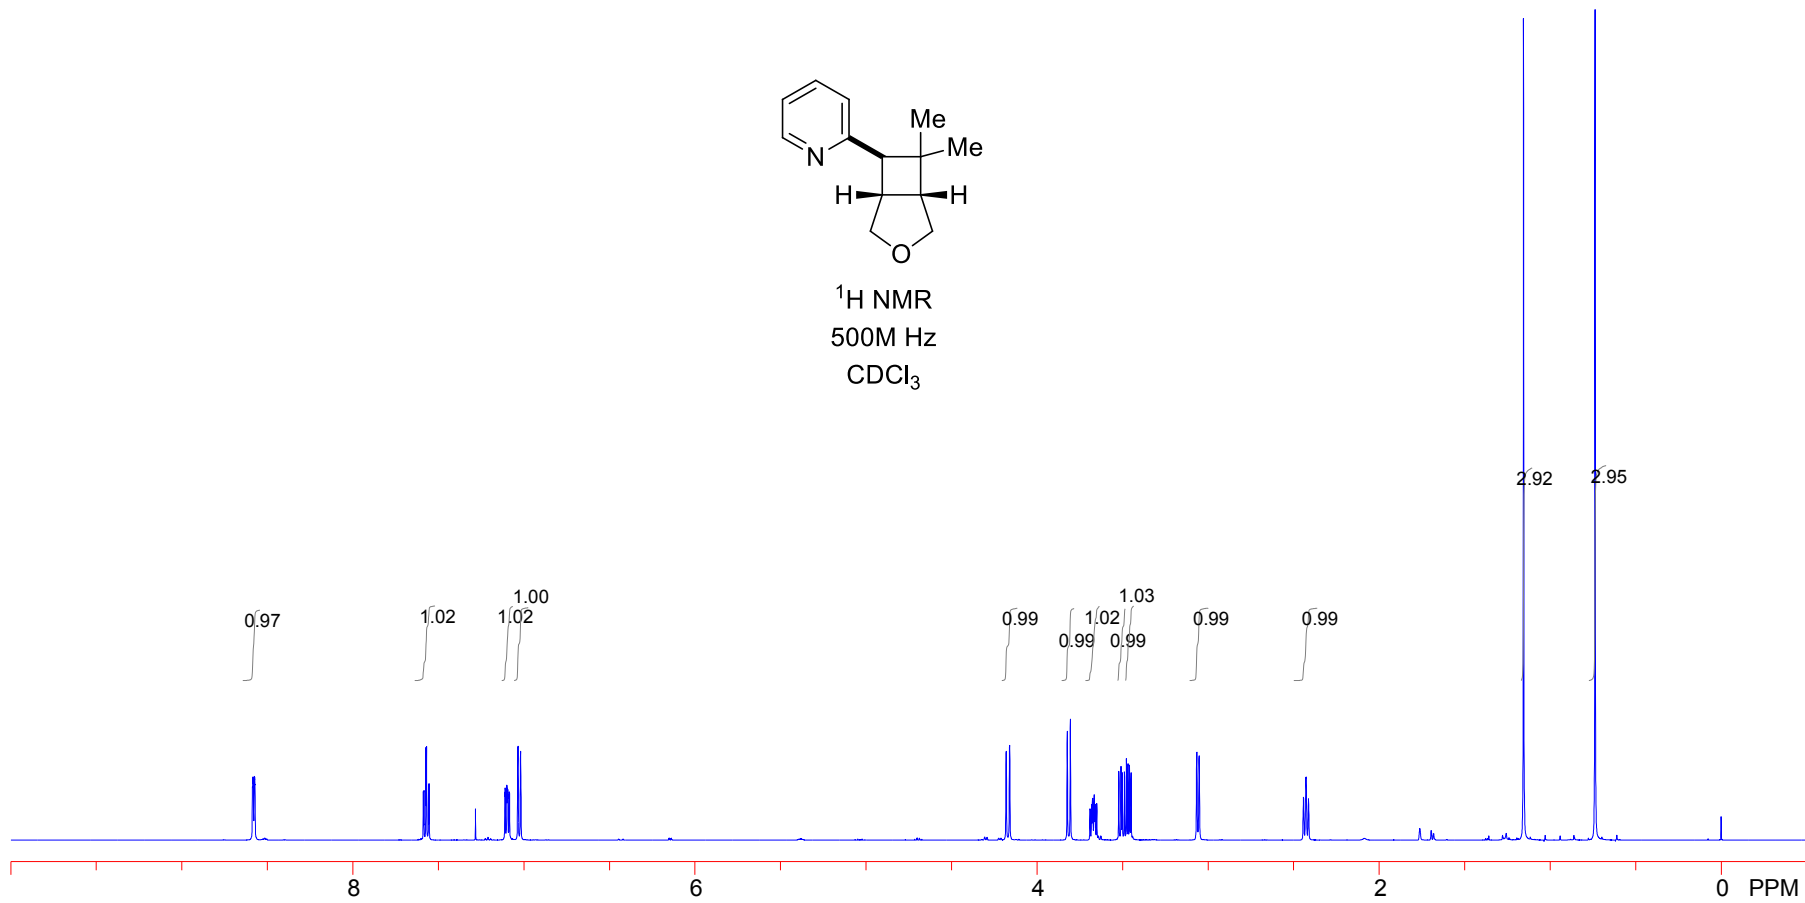

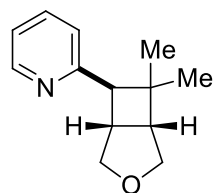

$^{13}\text{C}$  NMR  
125M Hz  
 $\text{CDCl}_3$

160.345  
148.853  
135.522  
122.868  
120.889

77.253  
77.000  
76.747  
72.230  
69.085

53.465  
46.468

37.509  
36.509

25.786  
24.135

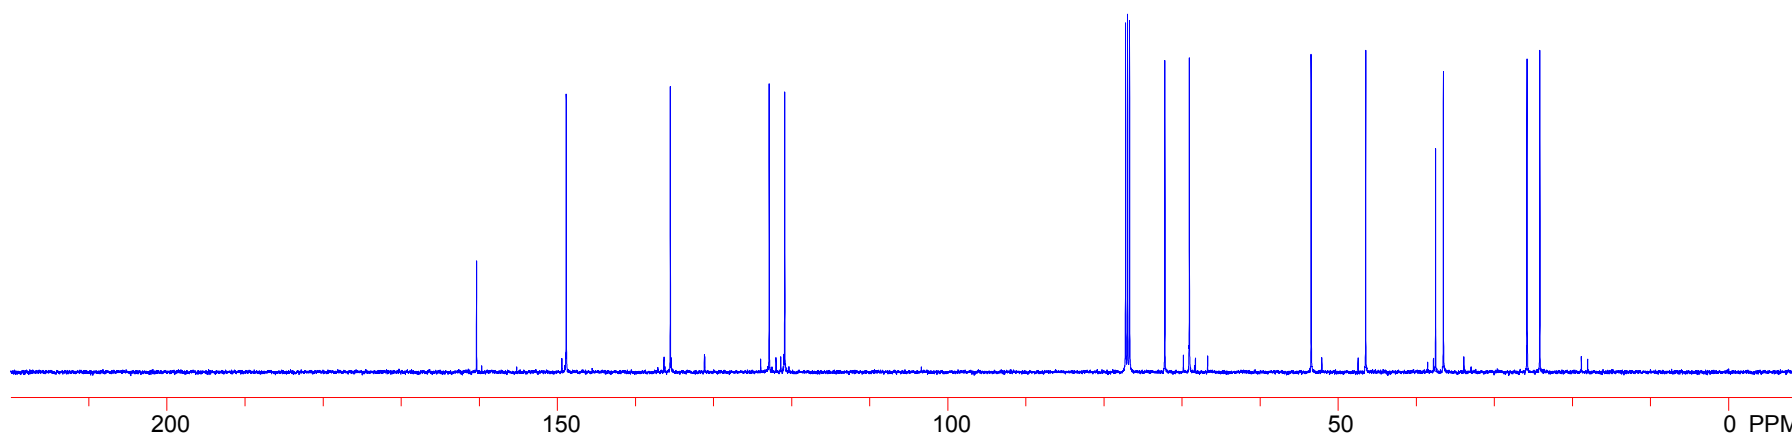



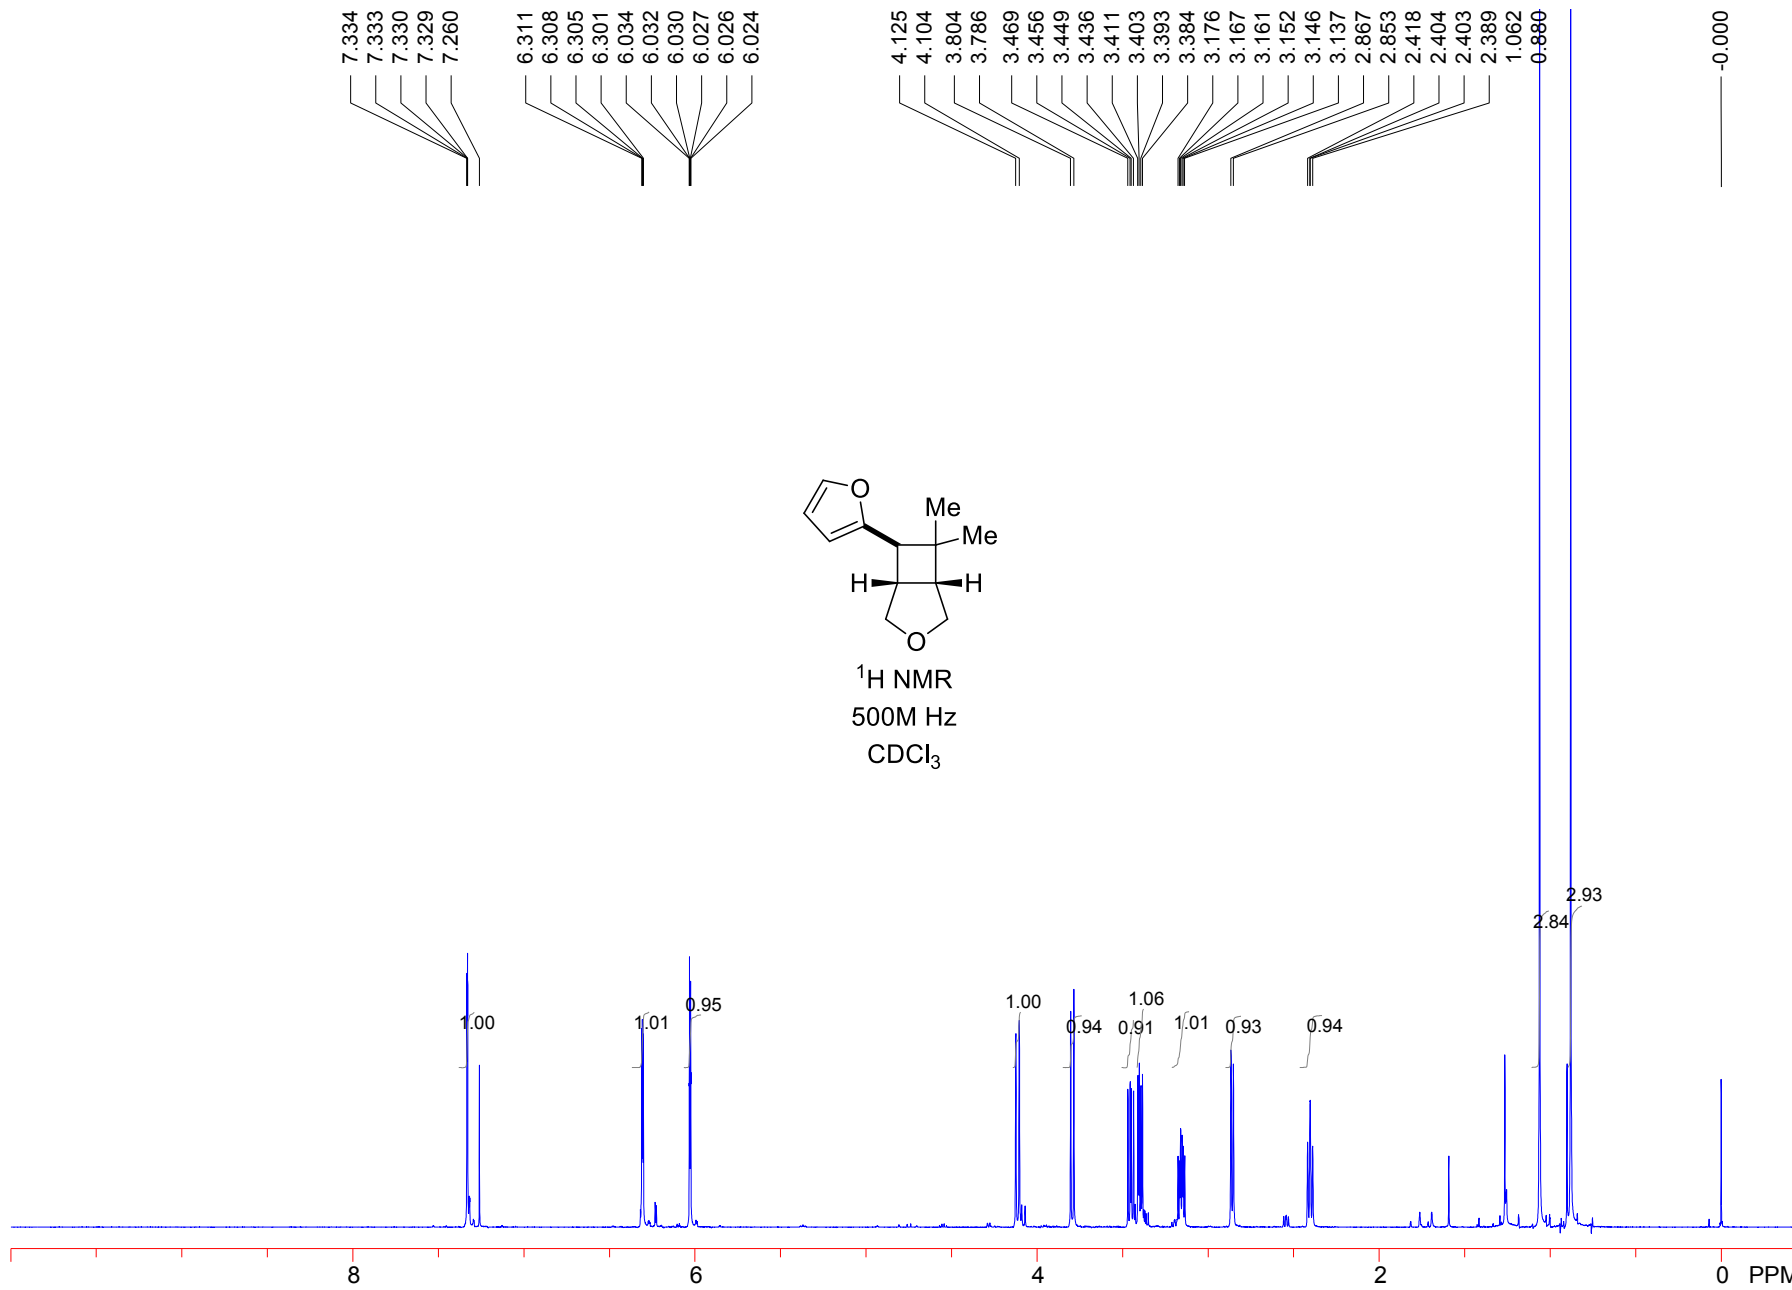

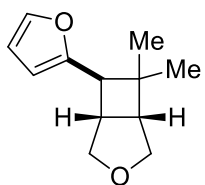

<sup>13</sup>C NMR  
125M Hz  
CDCl<sub>3</sub>

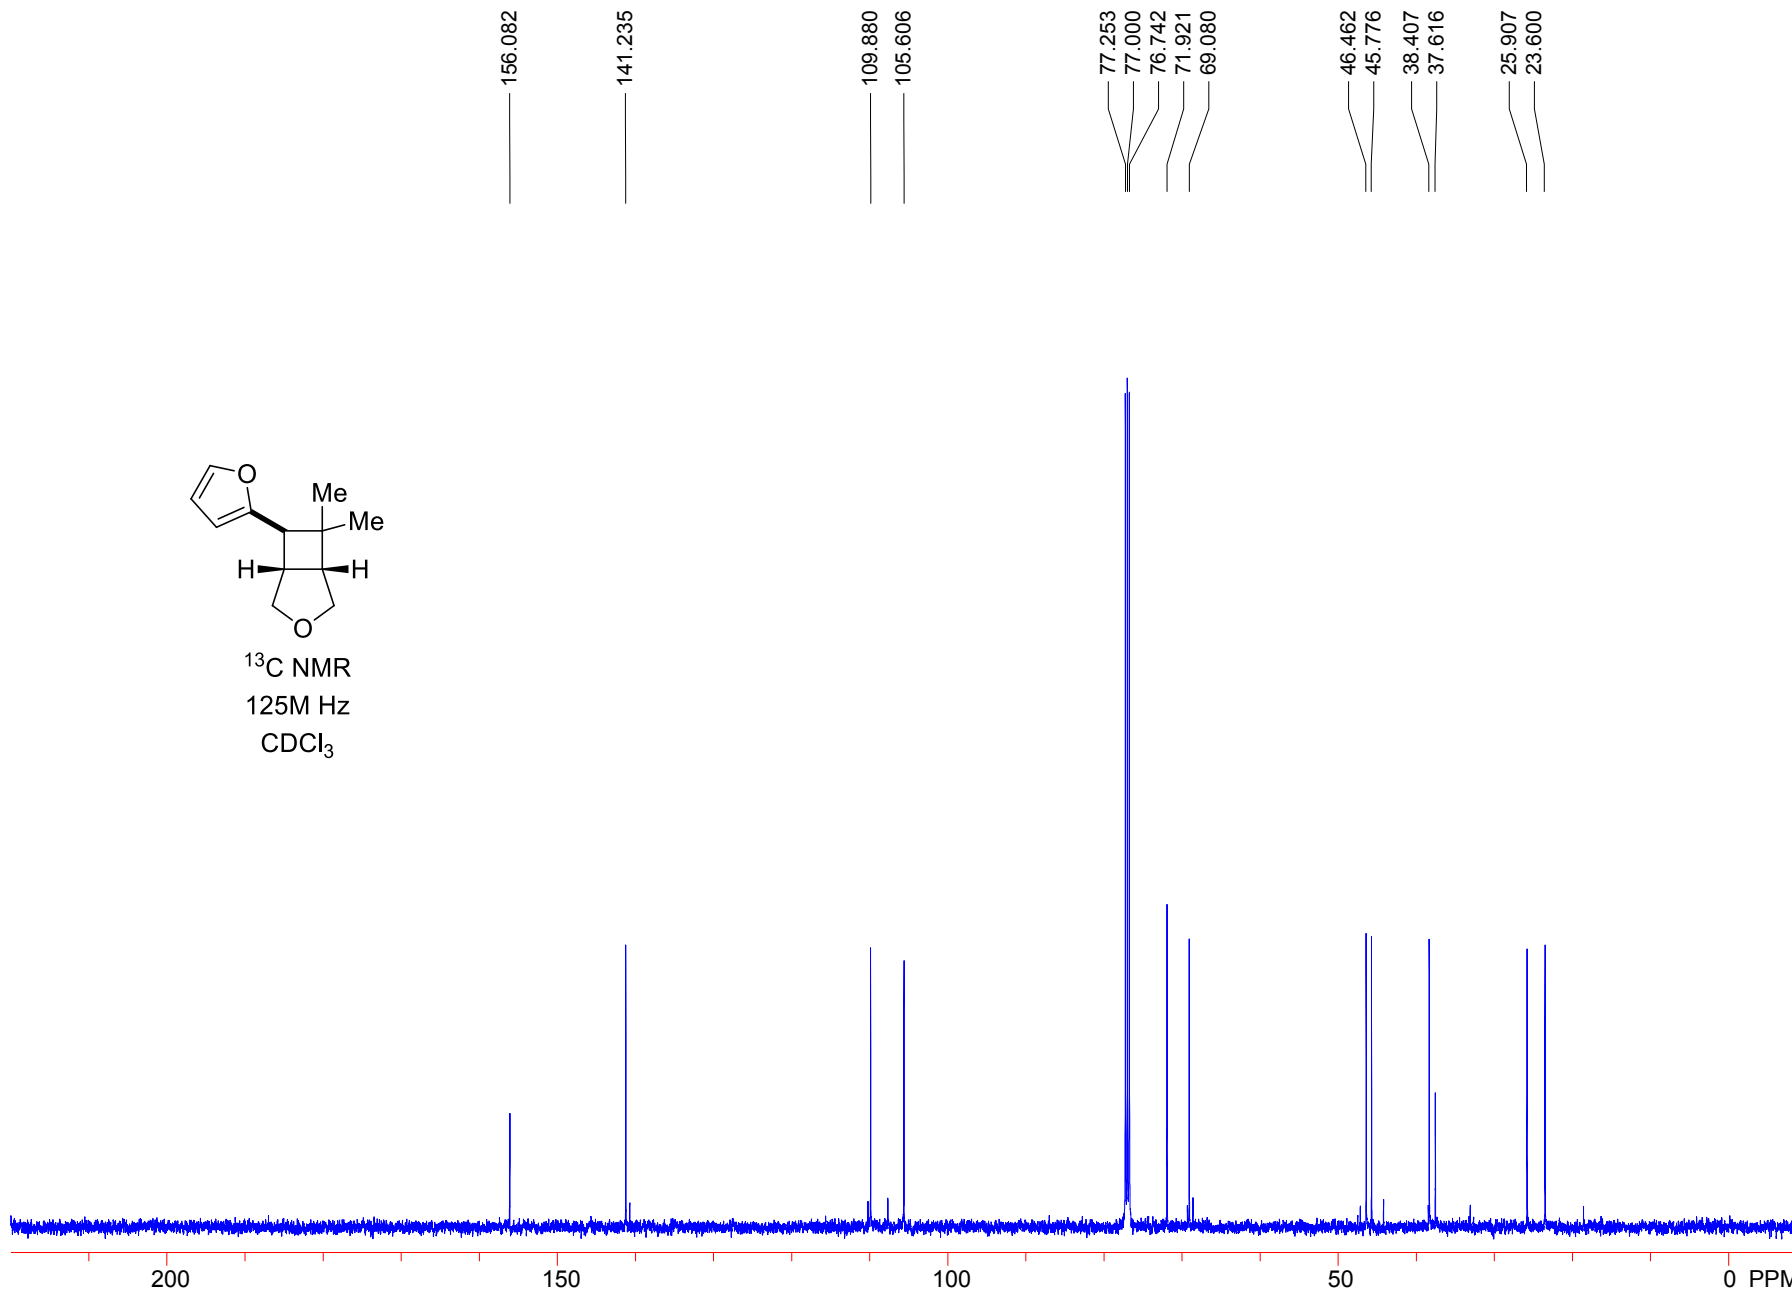

7.285  
7.280  
7.267  
7.262  
7.255  
7.250  
7.218  
7.205

4.148  
4.128  
3.748  
3.731  
3.627  
3.614  
3.607  
3.593  
3.152  
3.072  
3.054

2.016  
2.002

1.388  
1.205  
1.082

0.000

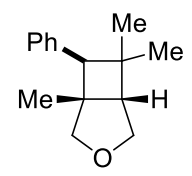

<sup>1</sup>H NMR  
500M Hz  
CDCl<sub>3</sub>

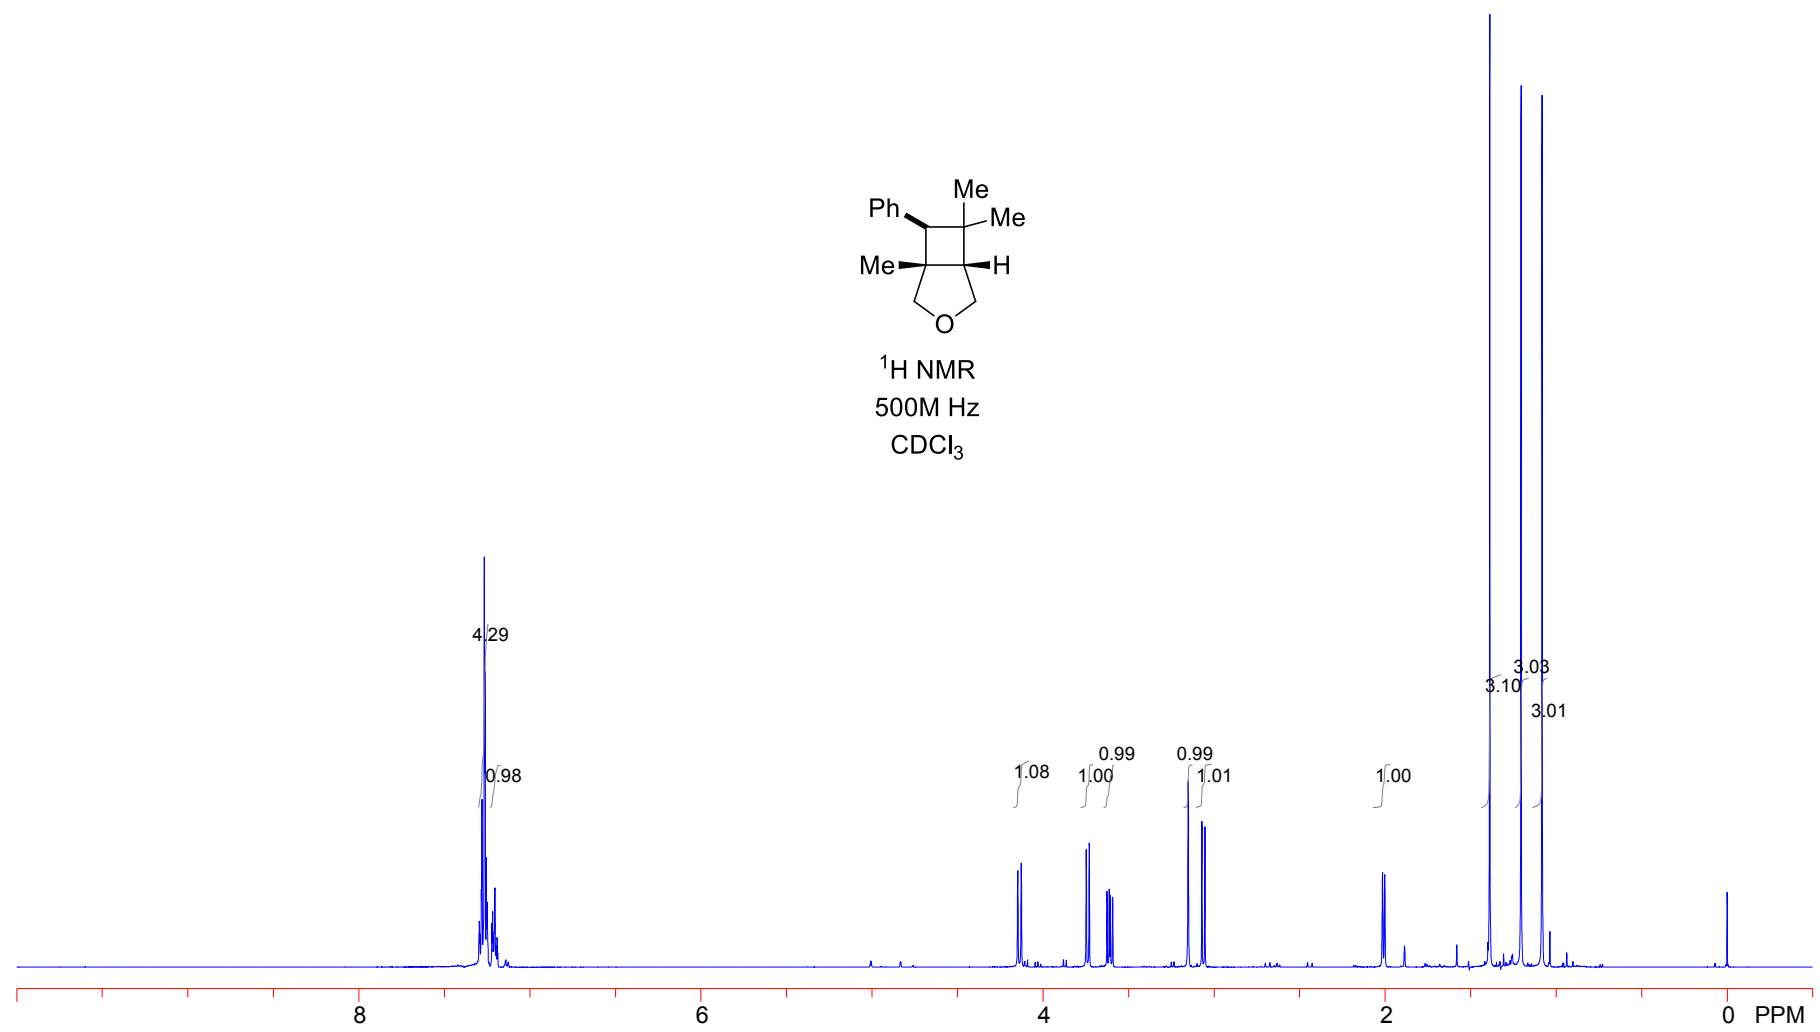

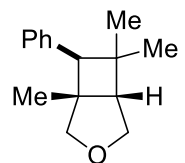

<sup>13</sup>C NMR  
125M Hz  
CDCl<sub>3</sub>

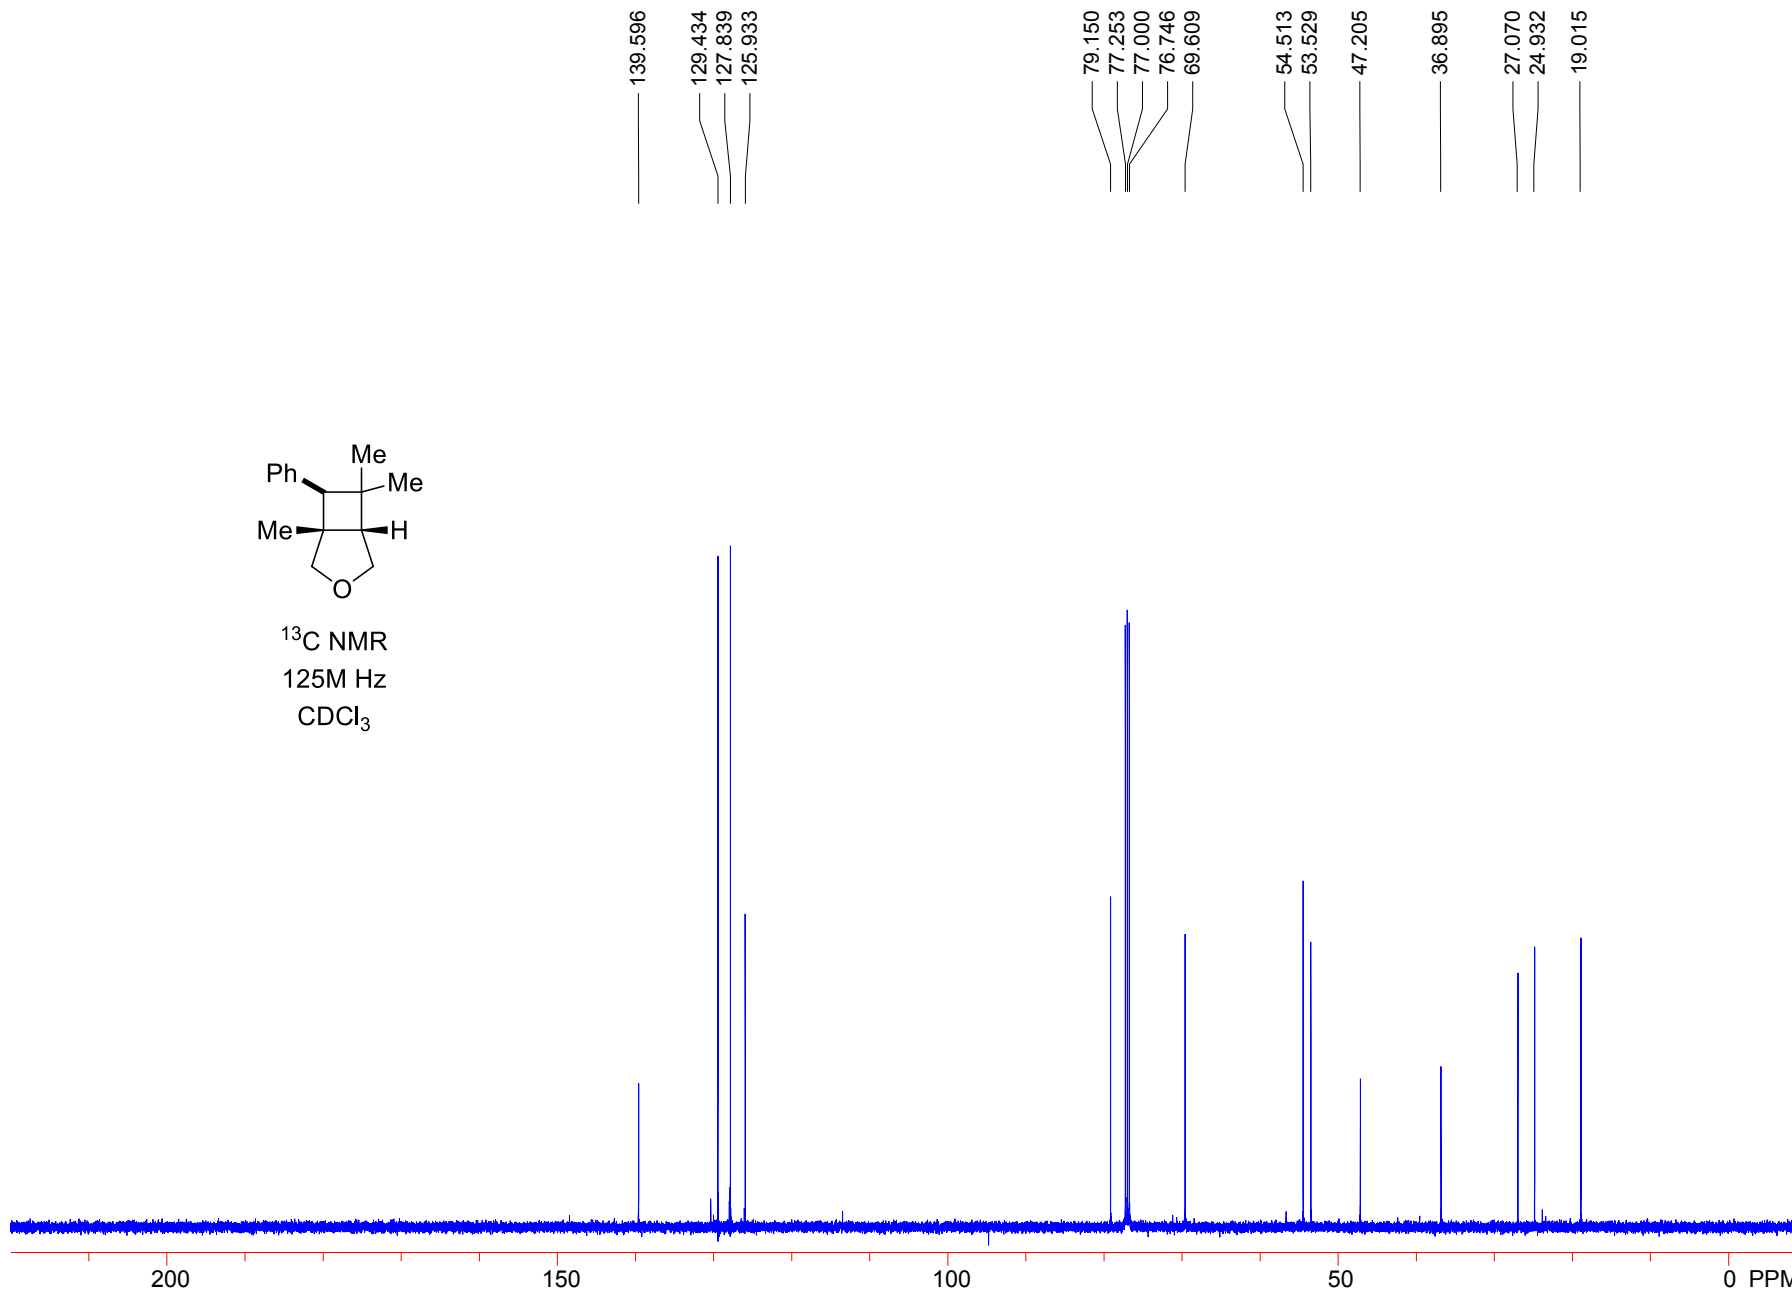

7.292  
7.285  
7.282  
7.265  
7.250  
7.201

4.122  
4.110  
4.102  
4.090  
3.669  
3.657  
3.649  
3.637  
3.153  
3.134  
3.099

2.181  
2.170

1.397  
1.306

0.937

-0.000

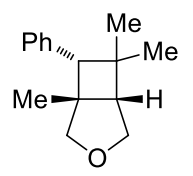

<sup>1</sup>H NMR  
500M Hz  
CDCl<sub>3</sub>

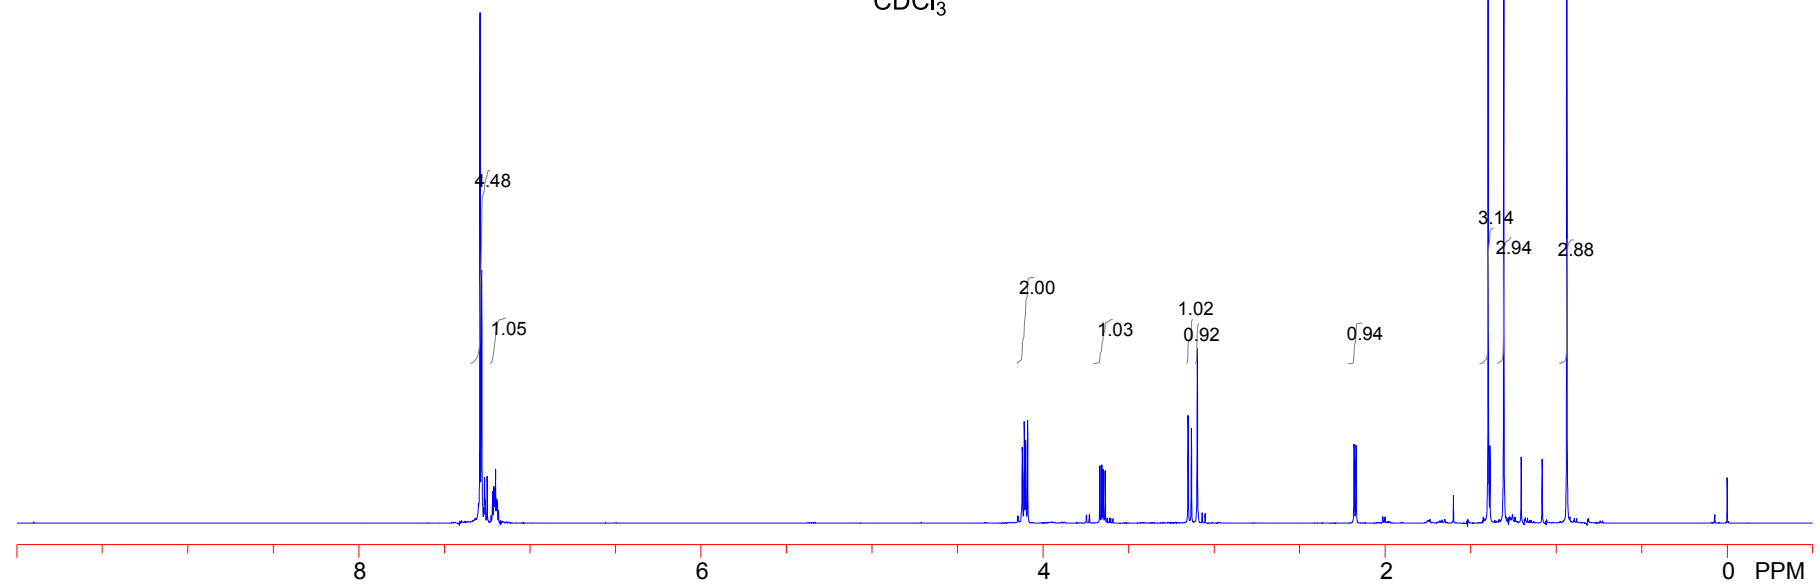

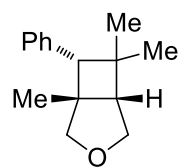

$^{13}\text{C}$  NMR  
125M Hz  
 $\text{CDCl}_3$

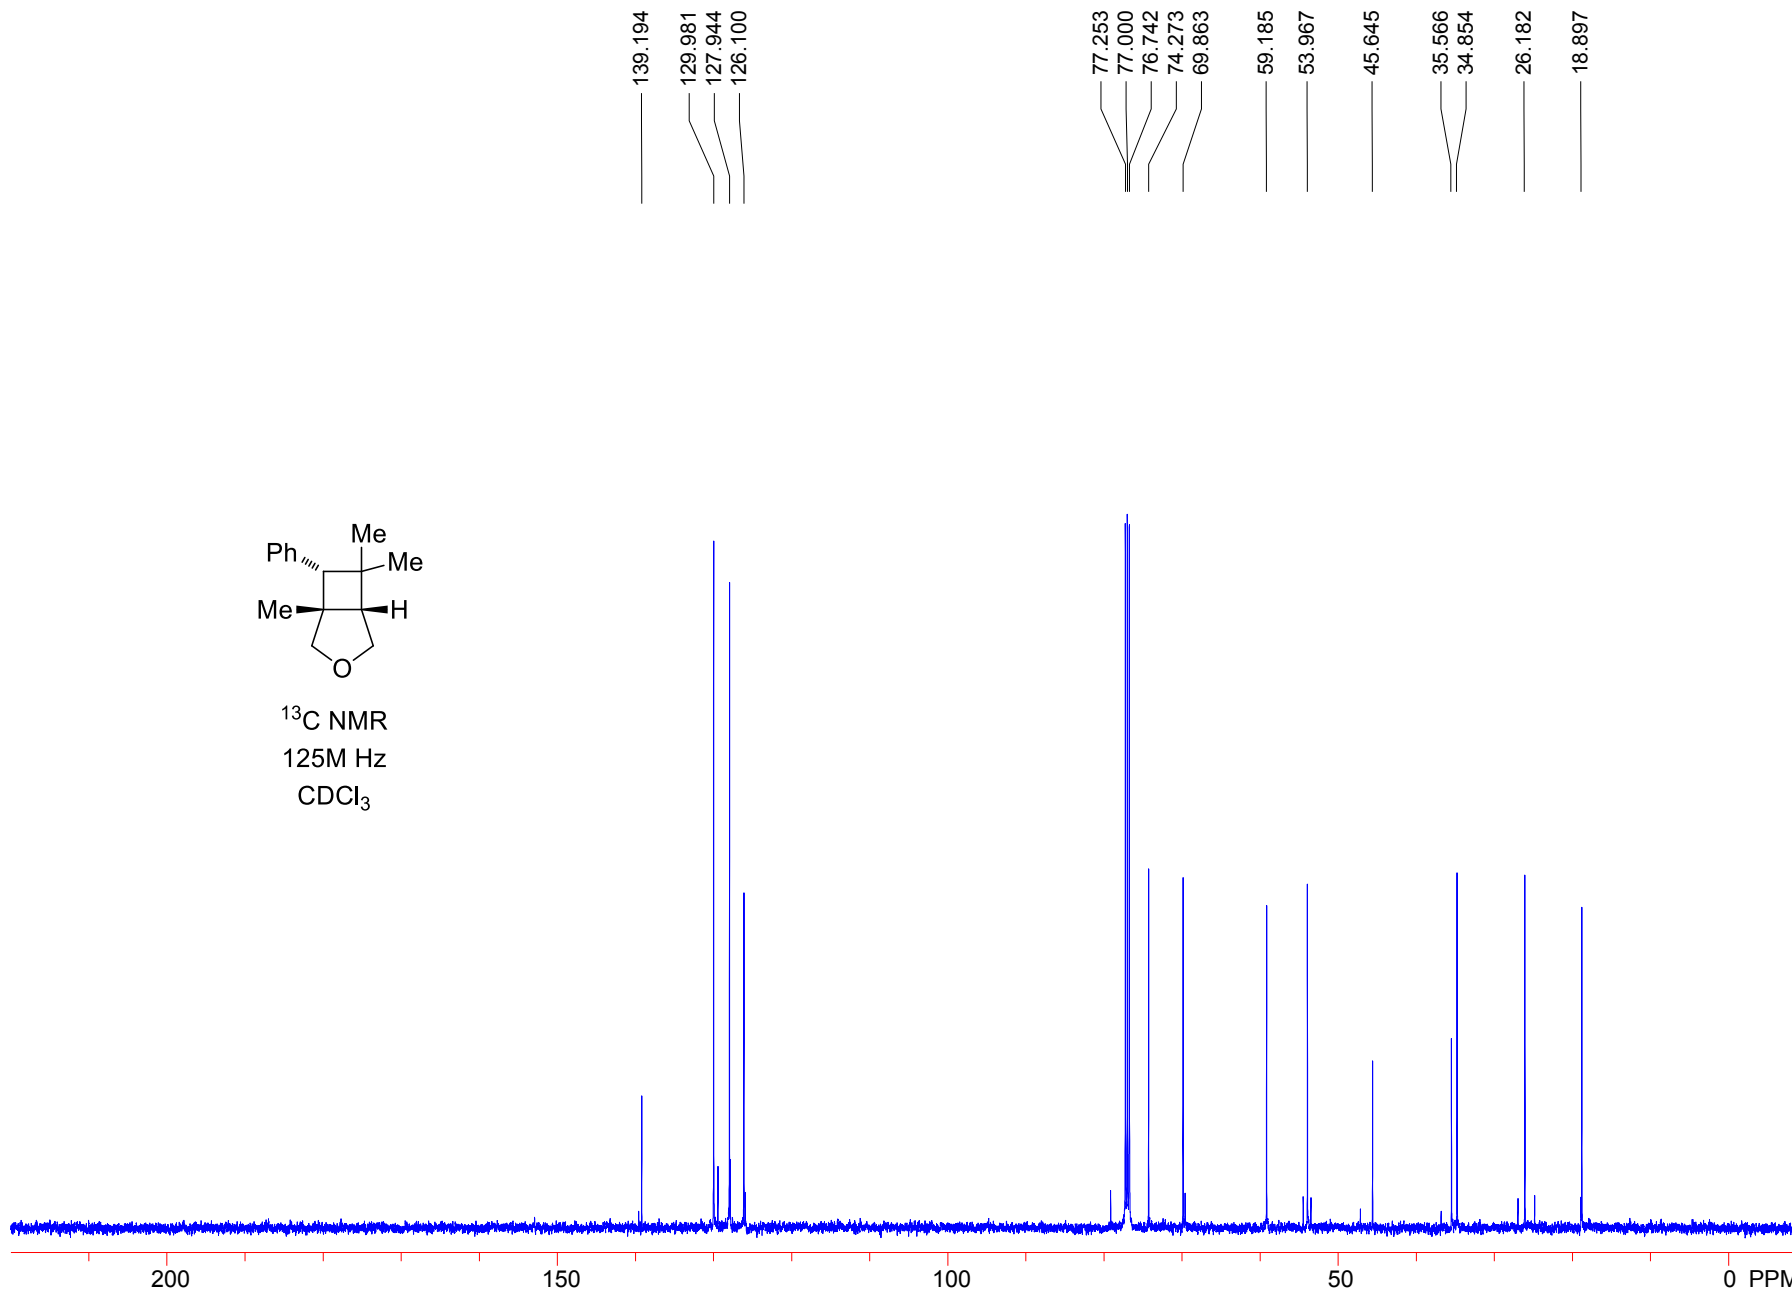

6.822  
6.818  
6.809  
6.805  
6.640  
6.636  
6.627  
6.623

2.428  
2.416  
2.068  
2.064  
2.056  
2.040  
2.036  
2.018  
1.993  
1.981  
1.968

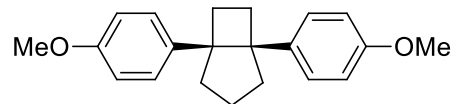

<sup>1</sup>H NMR  
500M Hz  
CDCl<sub>3</sub>

3.699

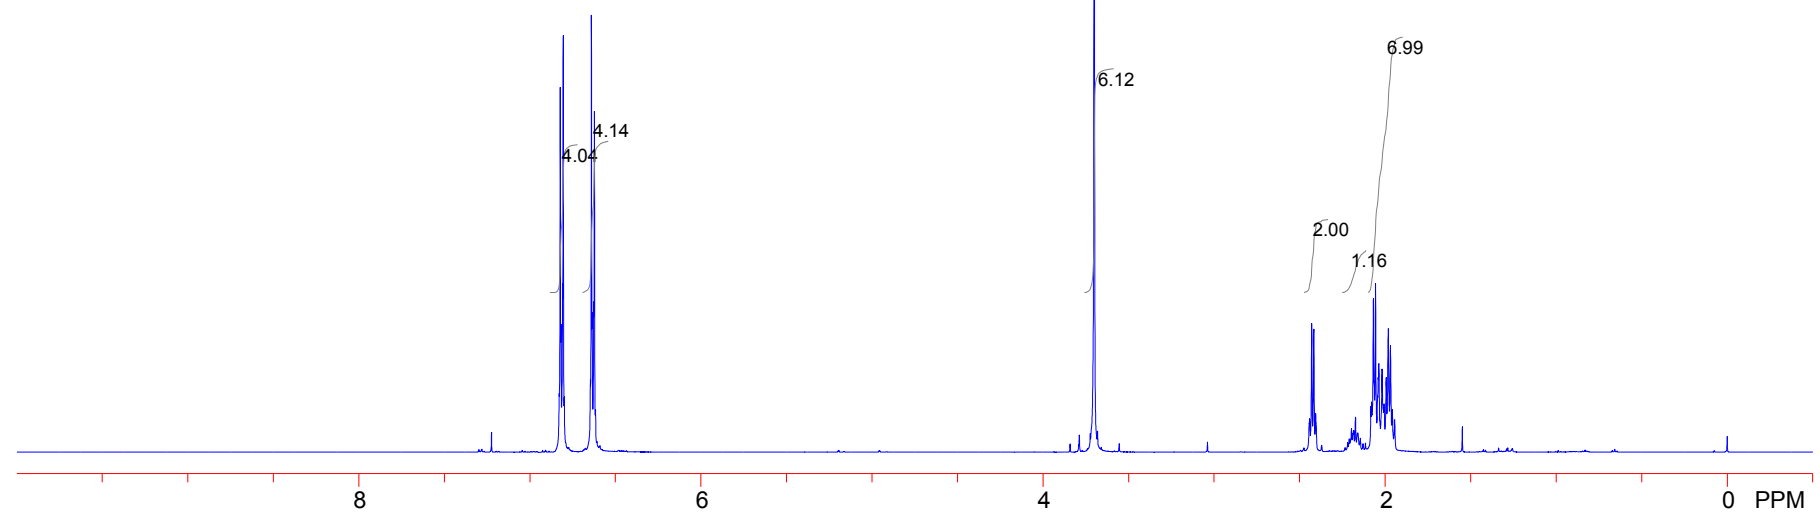

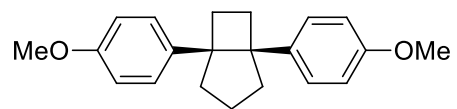

$^{13}\text{C}$  NMR  
125M Hz  
 $\text{CDCl}_3$

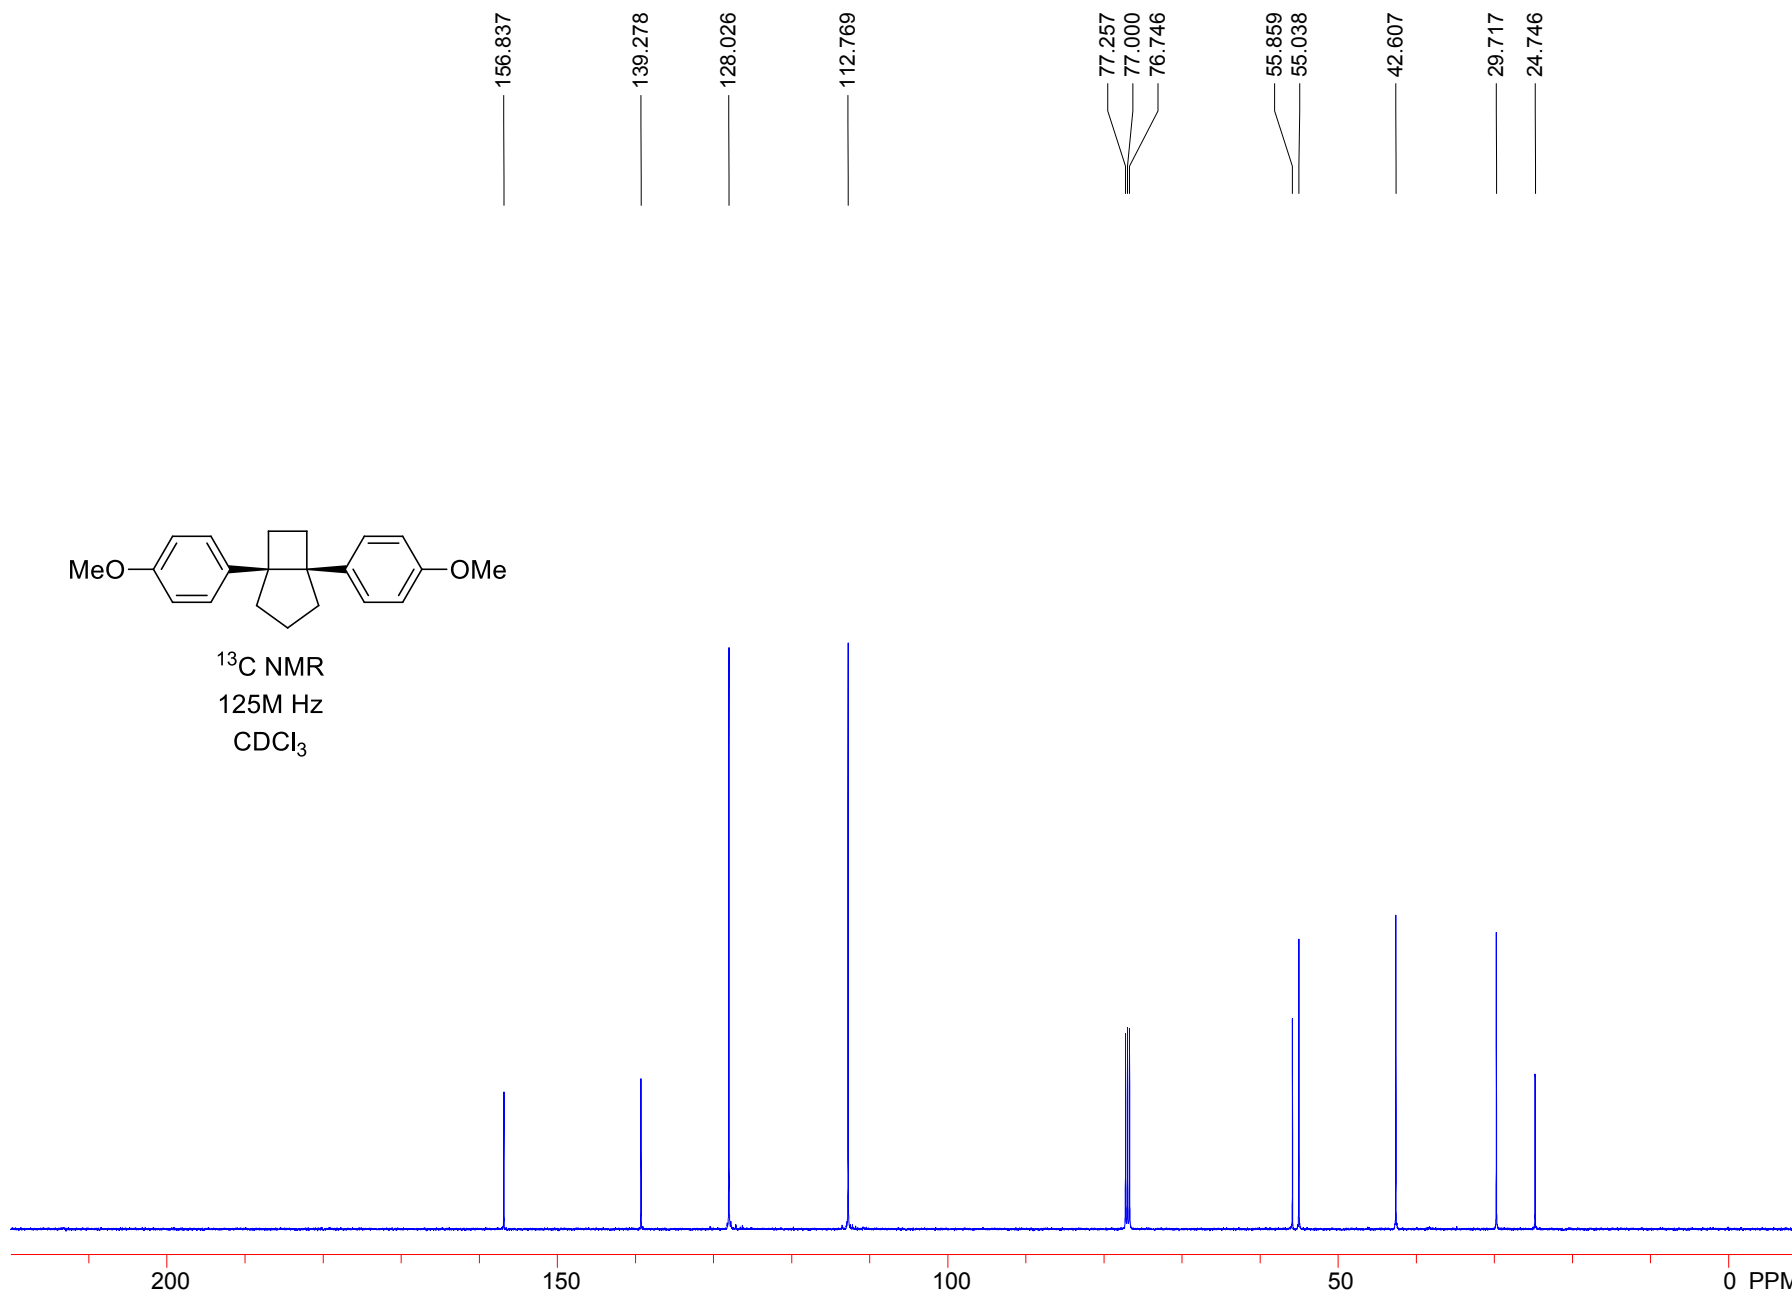



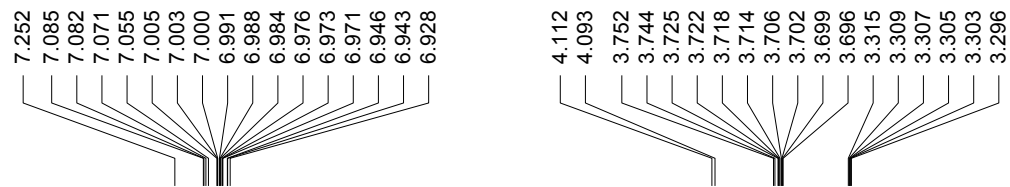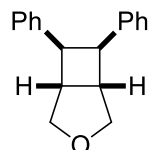

<sup>1</sup>H NMR  
500 MHz  
CDCl<sub>3</sub>

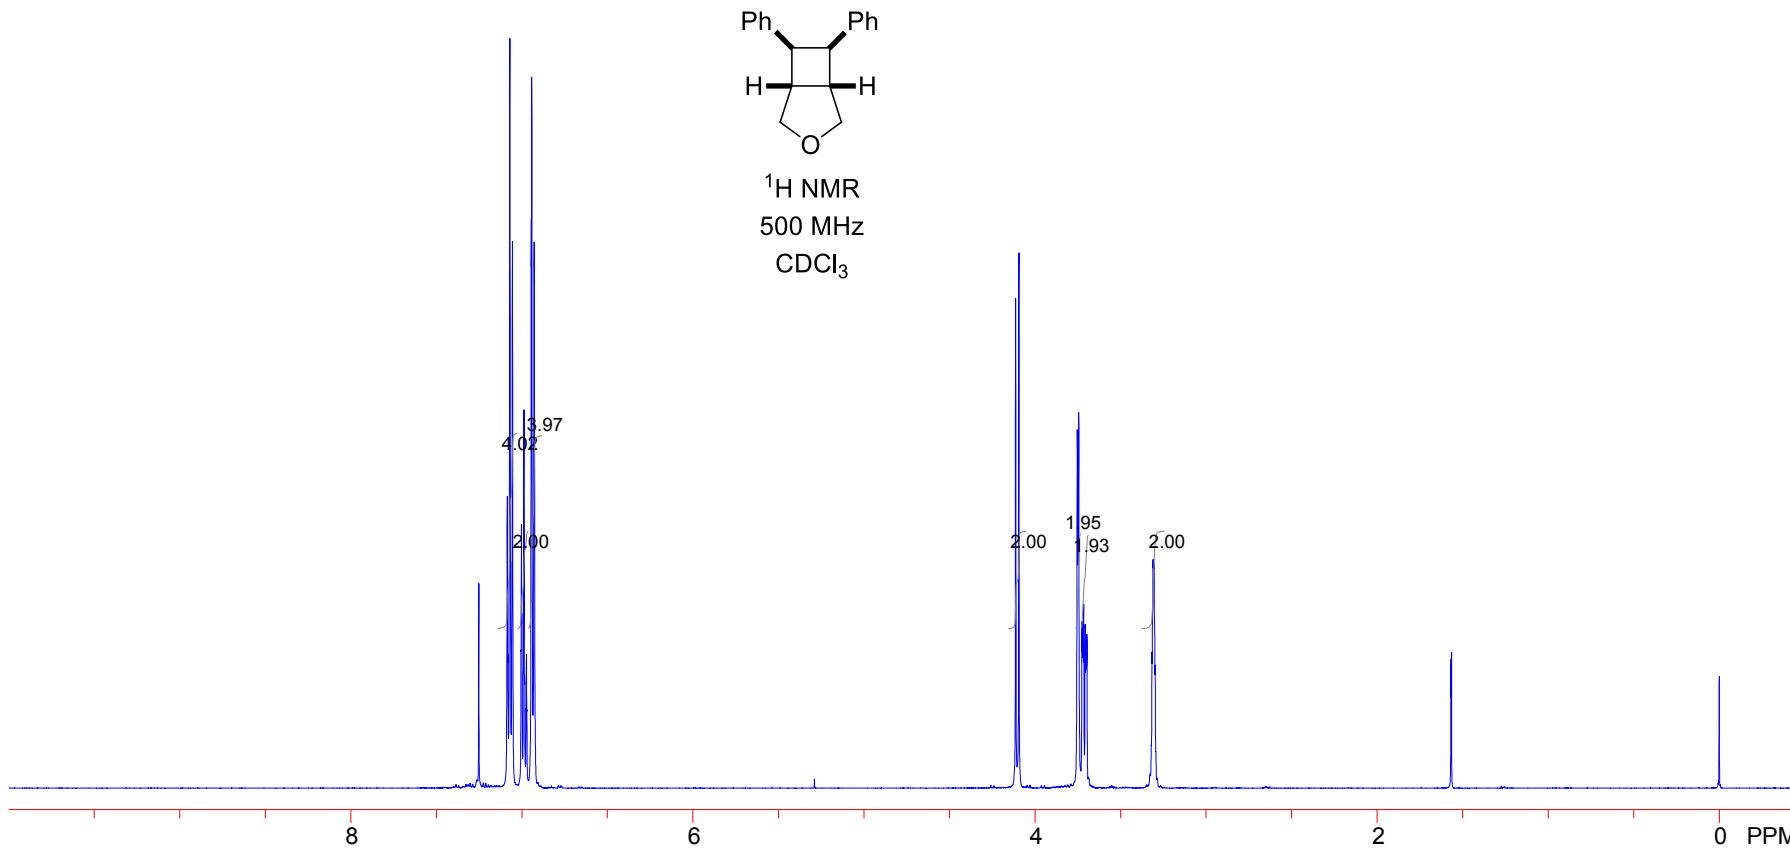

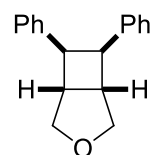

<sup>13</sup>C NMR  
125 MHz  
CDCl<sub>3</sub>

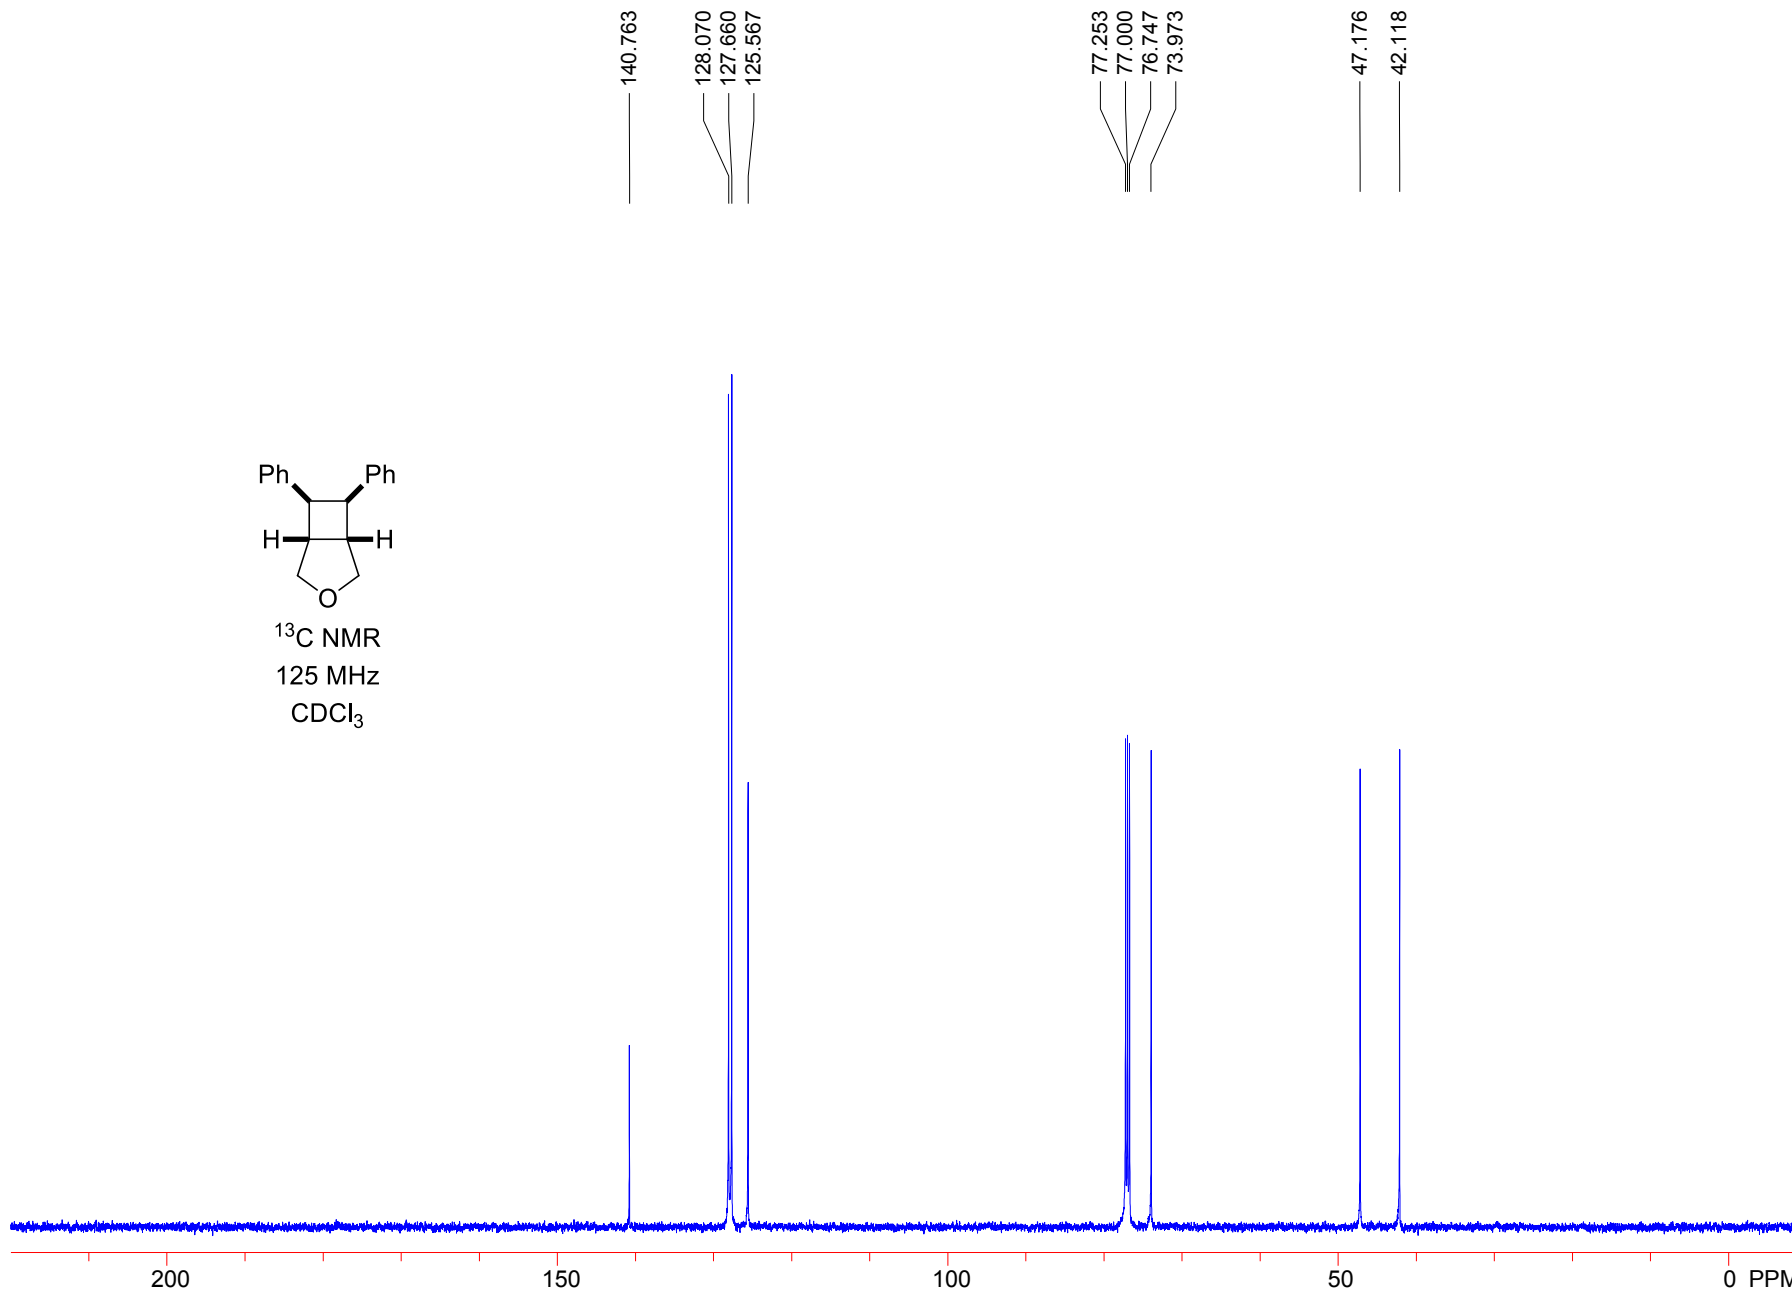

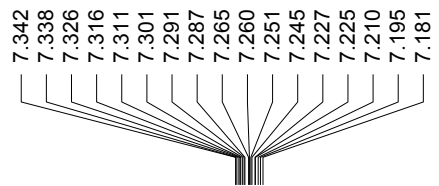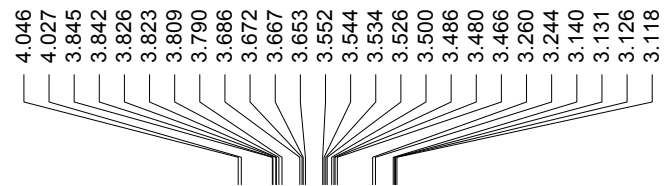

-0.000

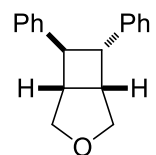

<sup>1</sup>H NMR  
500 MHz  
CDCl<sub>3</sub>

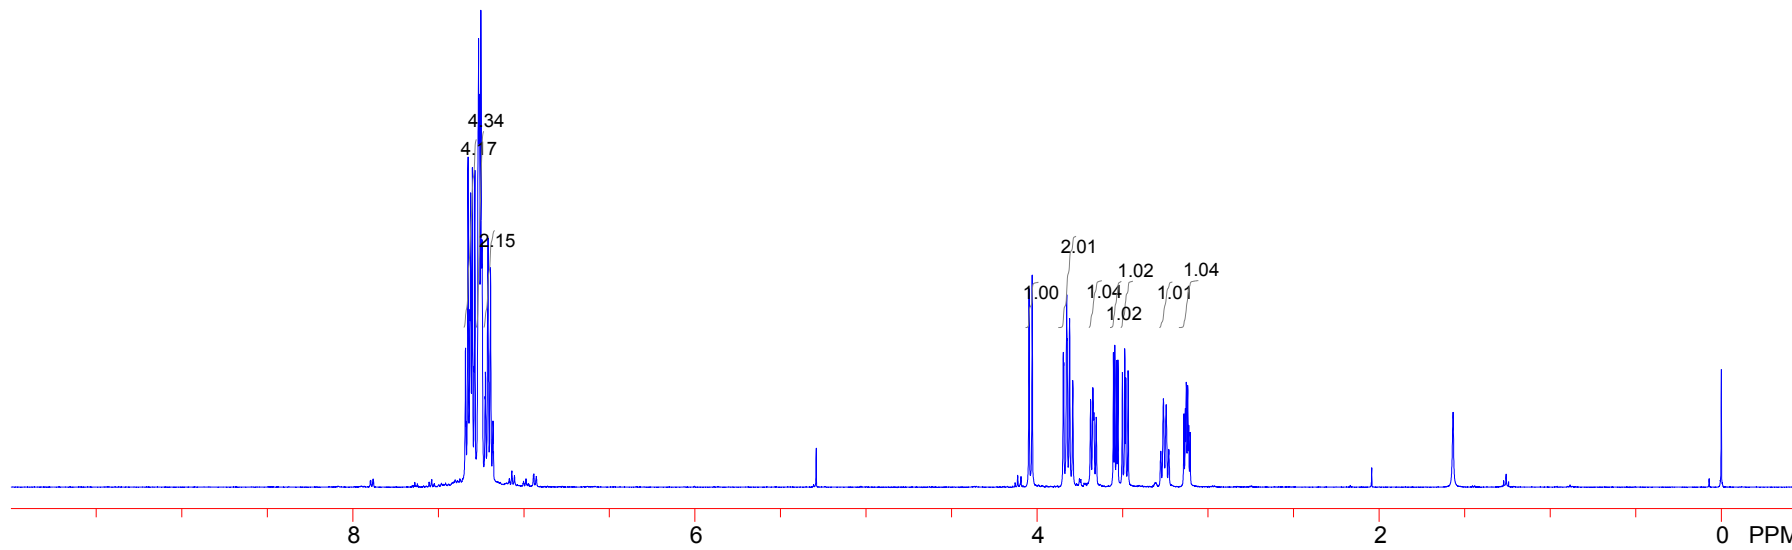

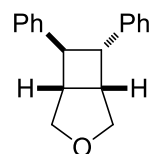

$^{13}\text{C}$  NMR  
125 MHz  
 $\text{CDCl}_3$

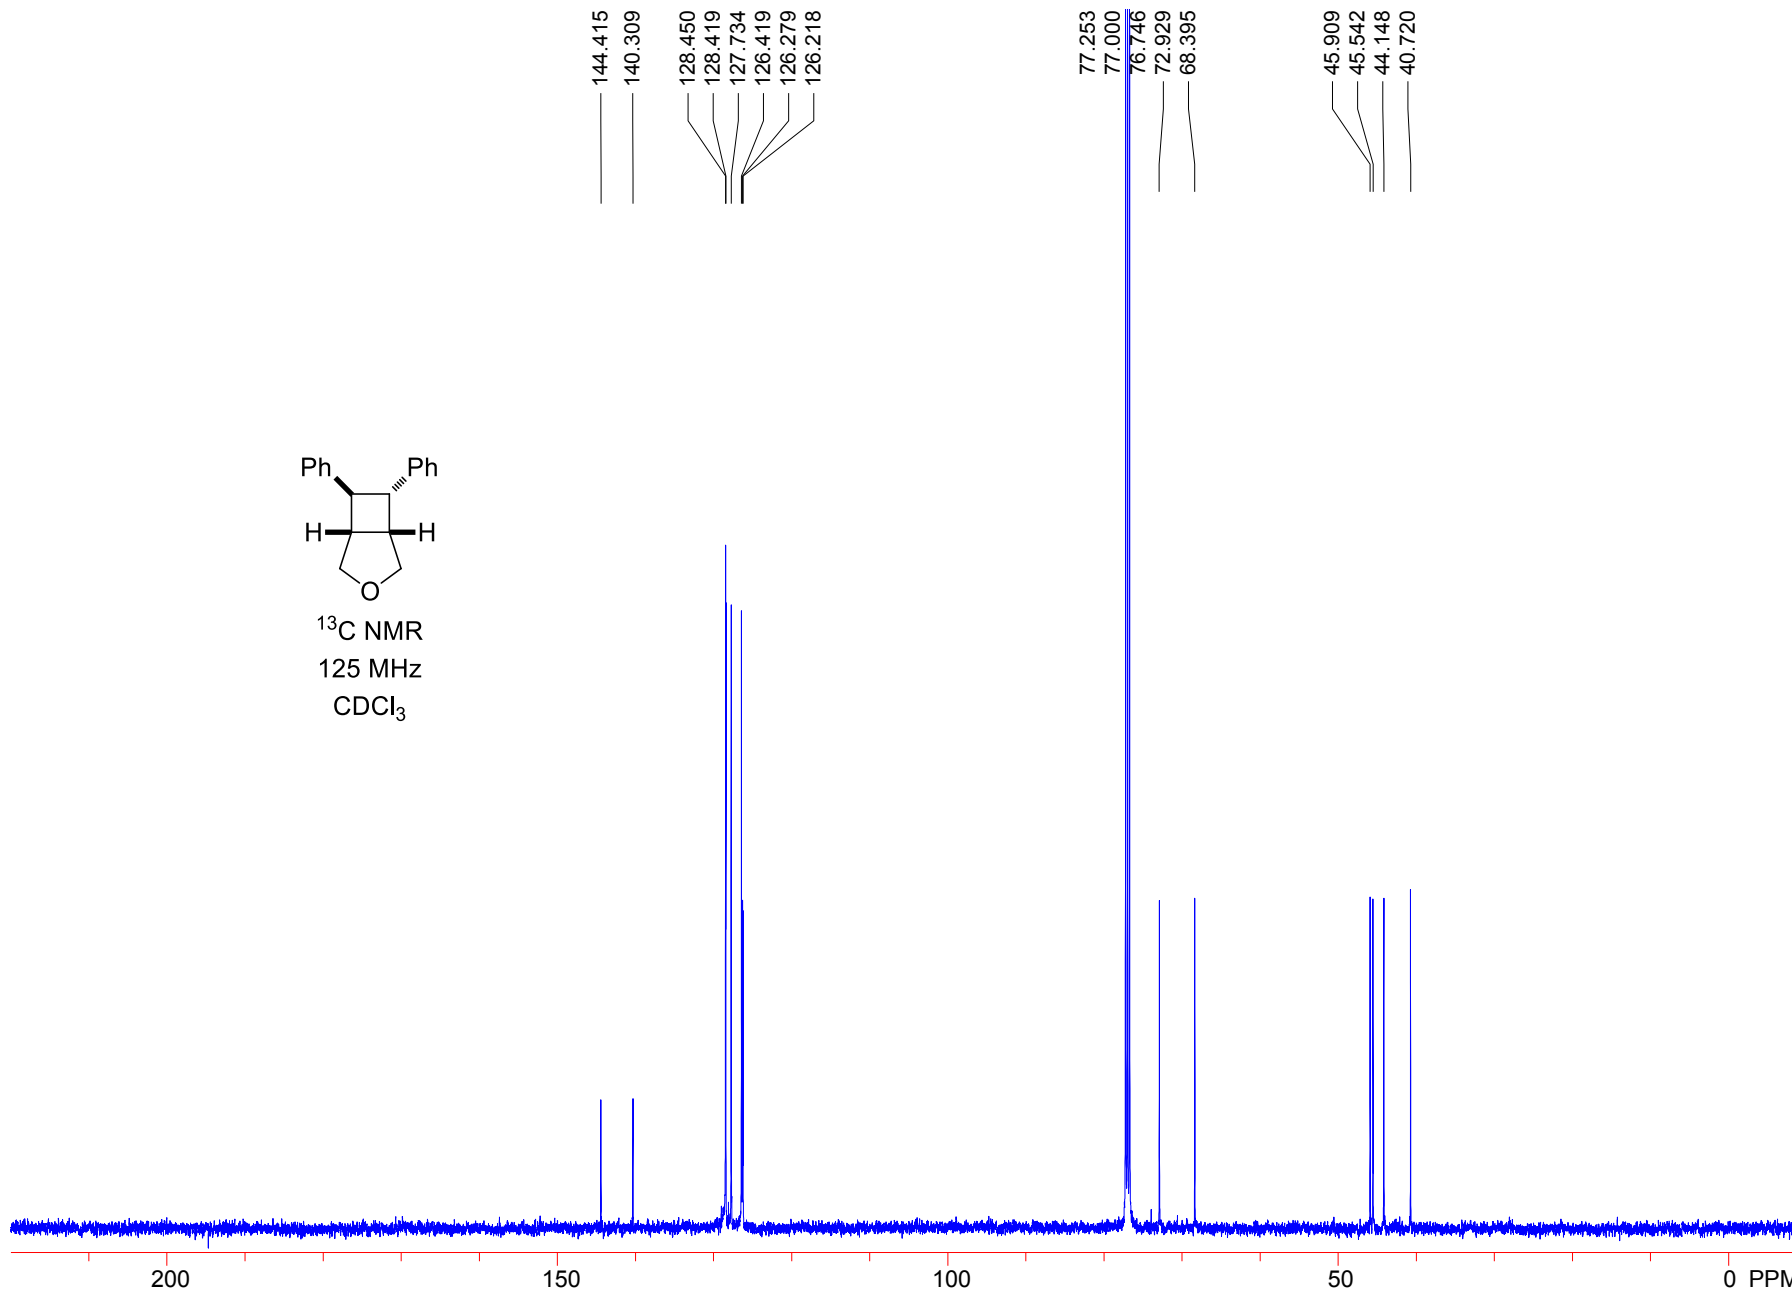

7.287  
7.284  
7.272  
7.261  
7.258  
7.254  
7.229  
7.226  
7.222  
7.212  
7.210  
7.188  
7.185  
7.182  
7.171  
7.167  
7.156

3.316  
3.305  
3.295  
3.284  
3.249  
3.236  
3.151  
3.049  
3.046  
3.042  
3.040  
3.031  
3.020  
1.934  
1.929  
1.923  
1.919  
1.913  
1.905  
1.894  
1.684  
1.675  
1.668  
1.663  
1.659  
1.656  
1.650  
1.645  
1.636  
1.631  
0.000

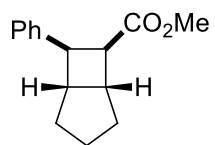

<sup>1</sup>H NMR  
500M Hz  
CDCl<sub>3</sub>

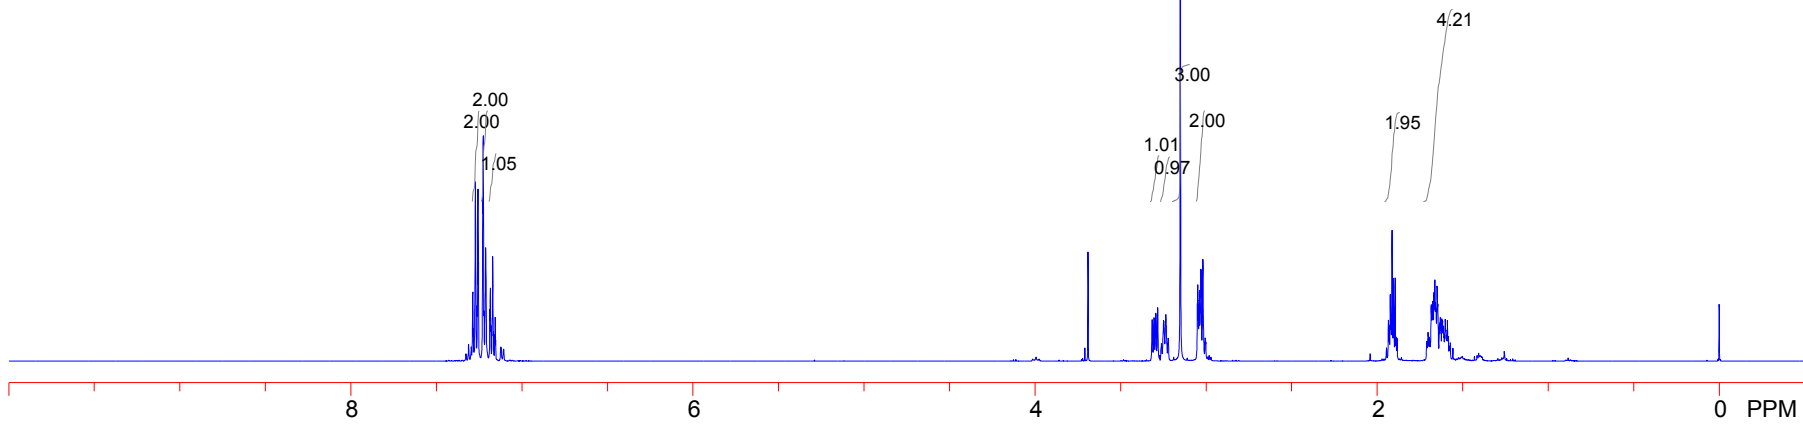

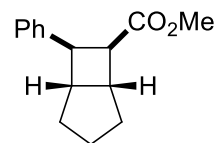

<sup>13</sup>C NMR  
125M Hz  
CDCl<sub>3</sub>

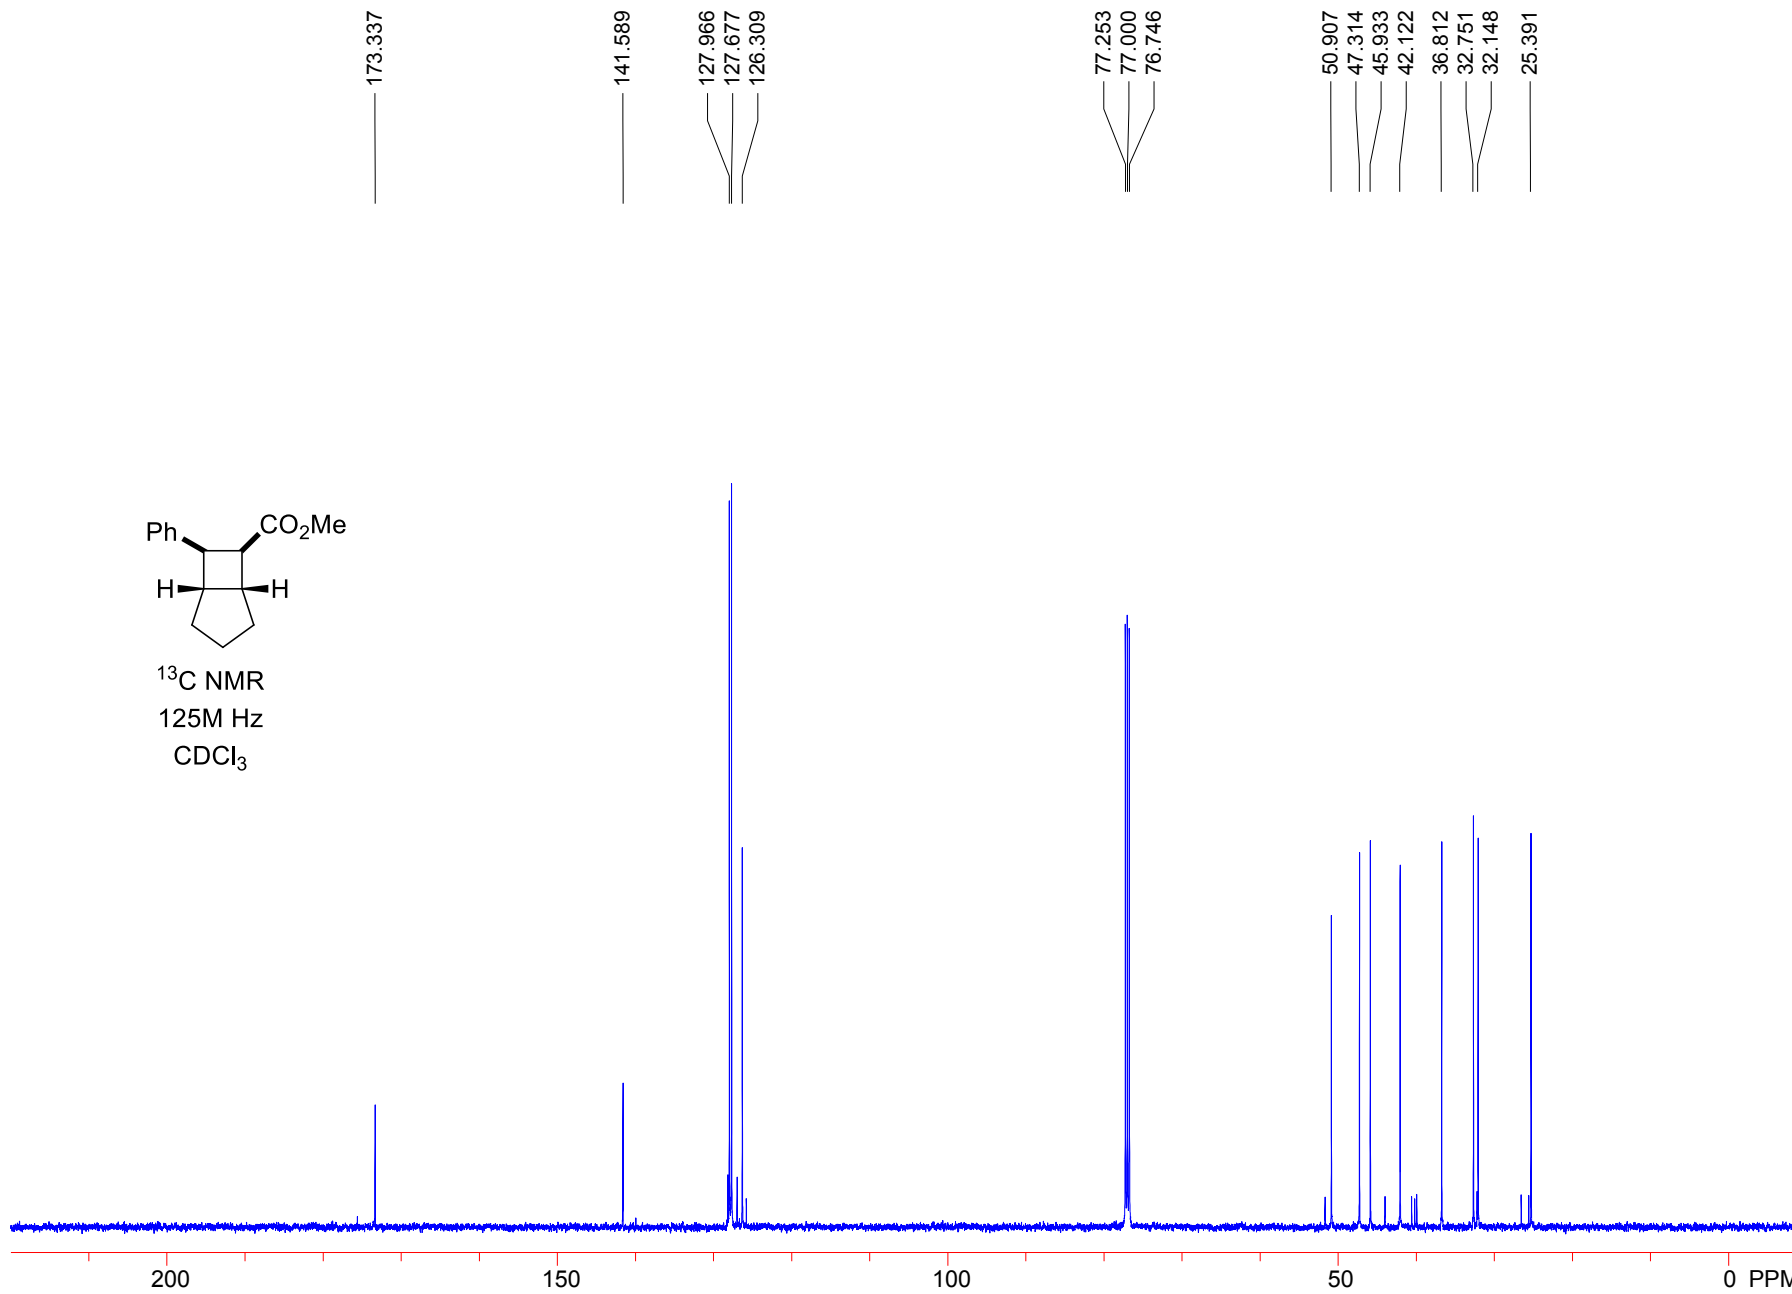

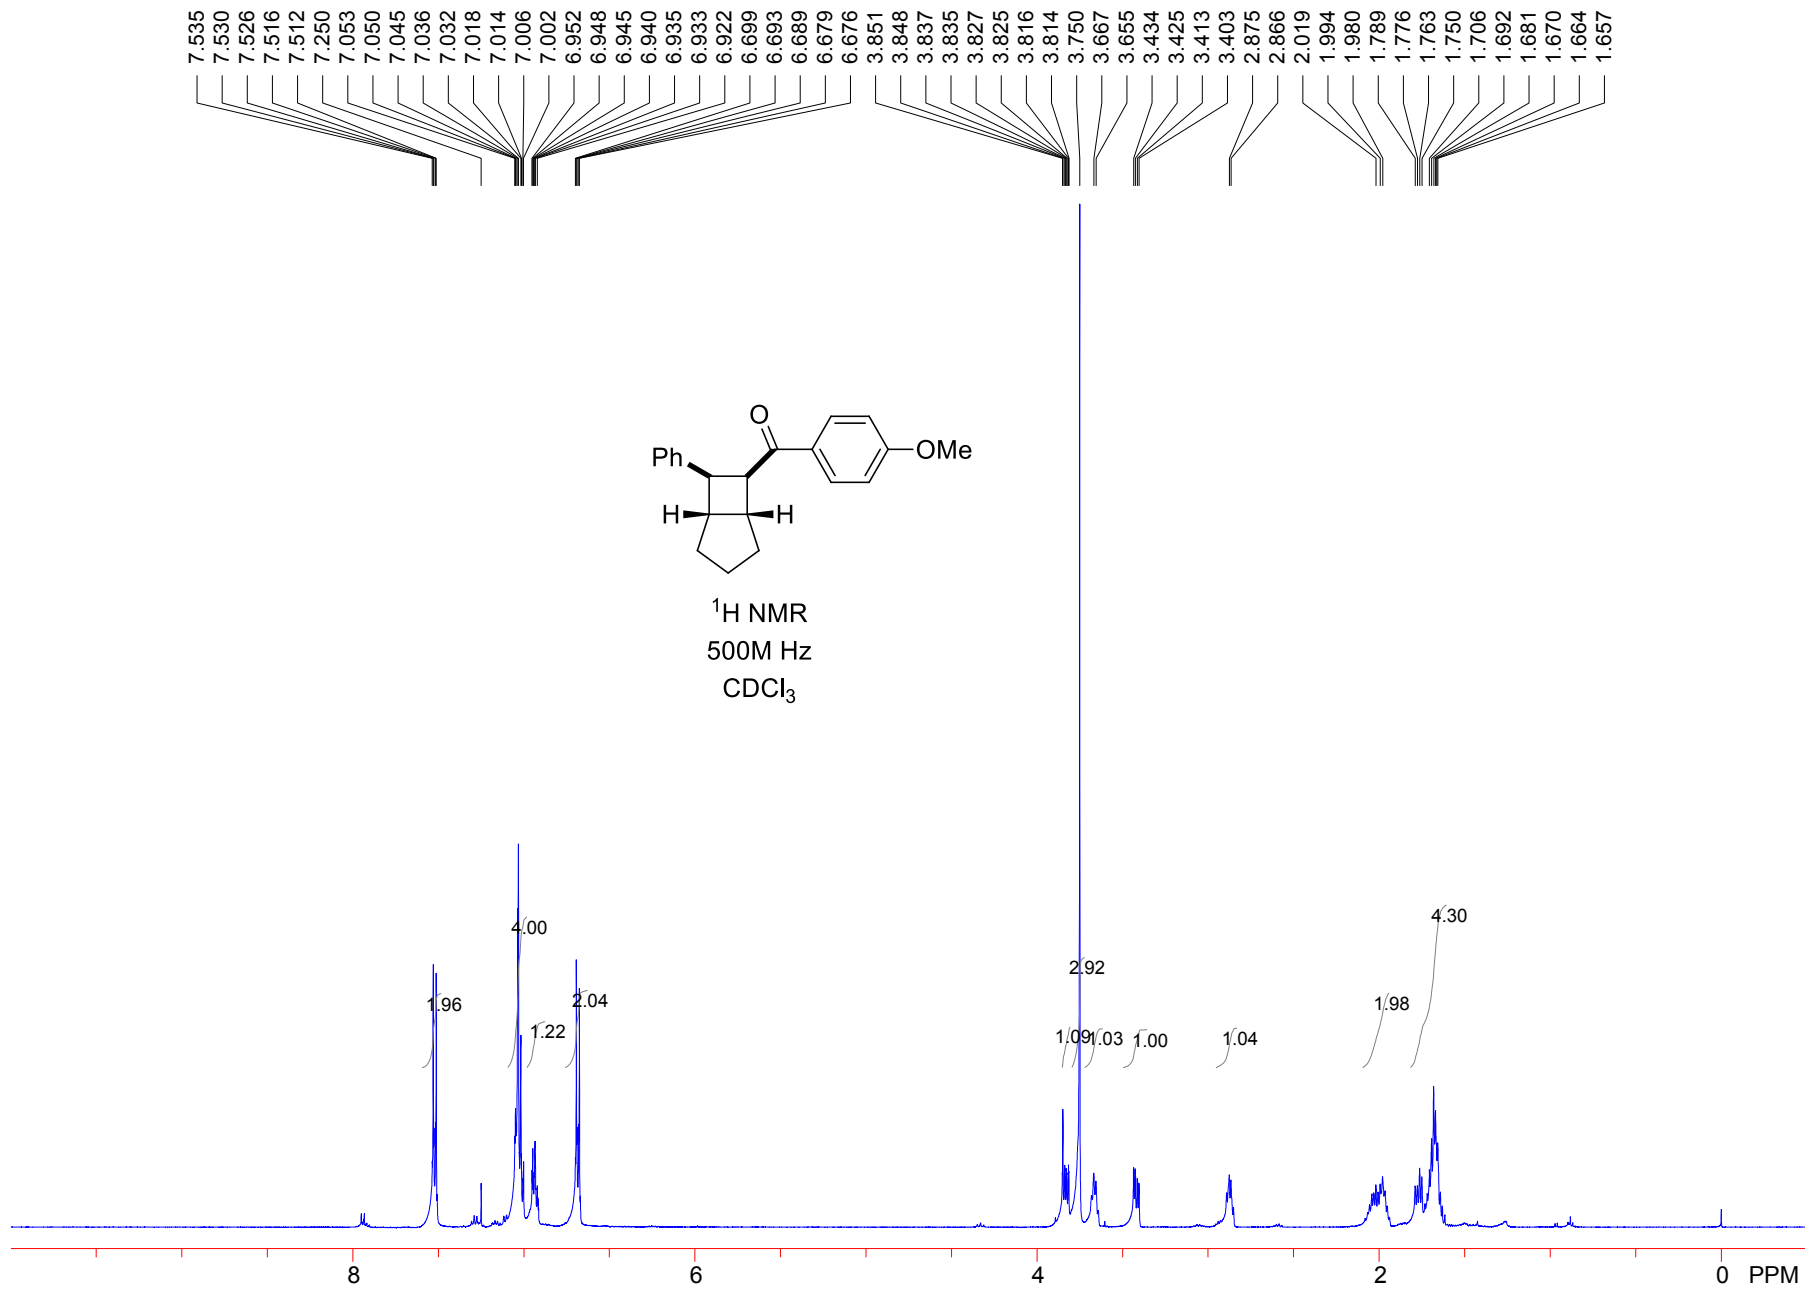

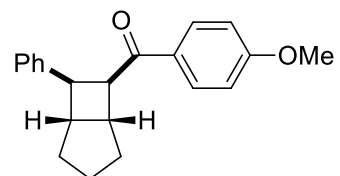

$^{13}\text{C}$  NMR  
125M Hz  
 $\text{CDCl}_3$

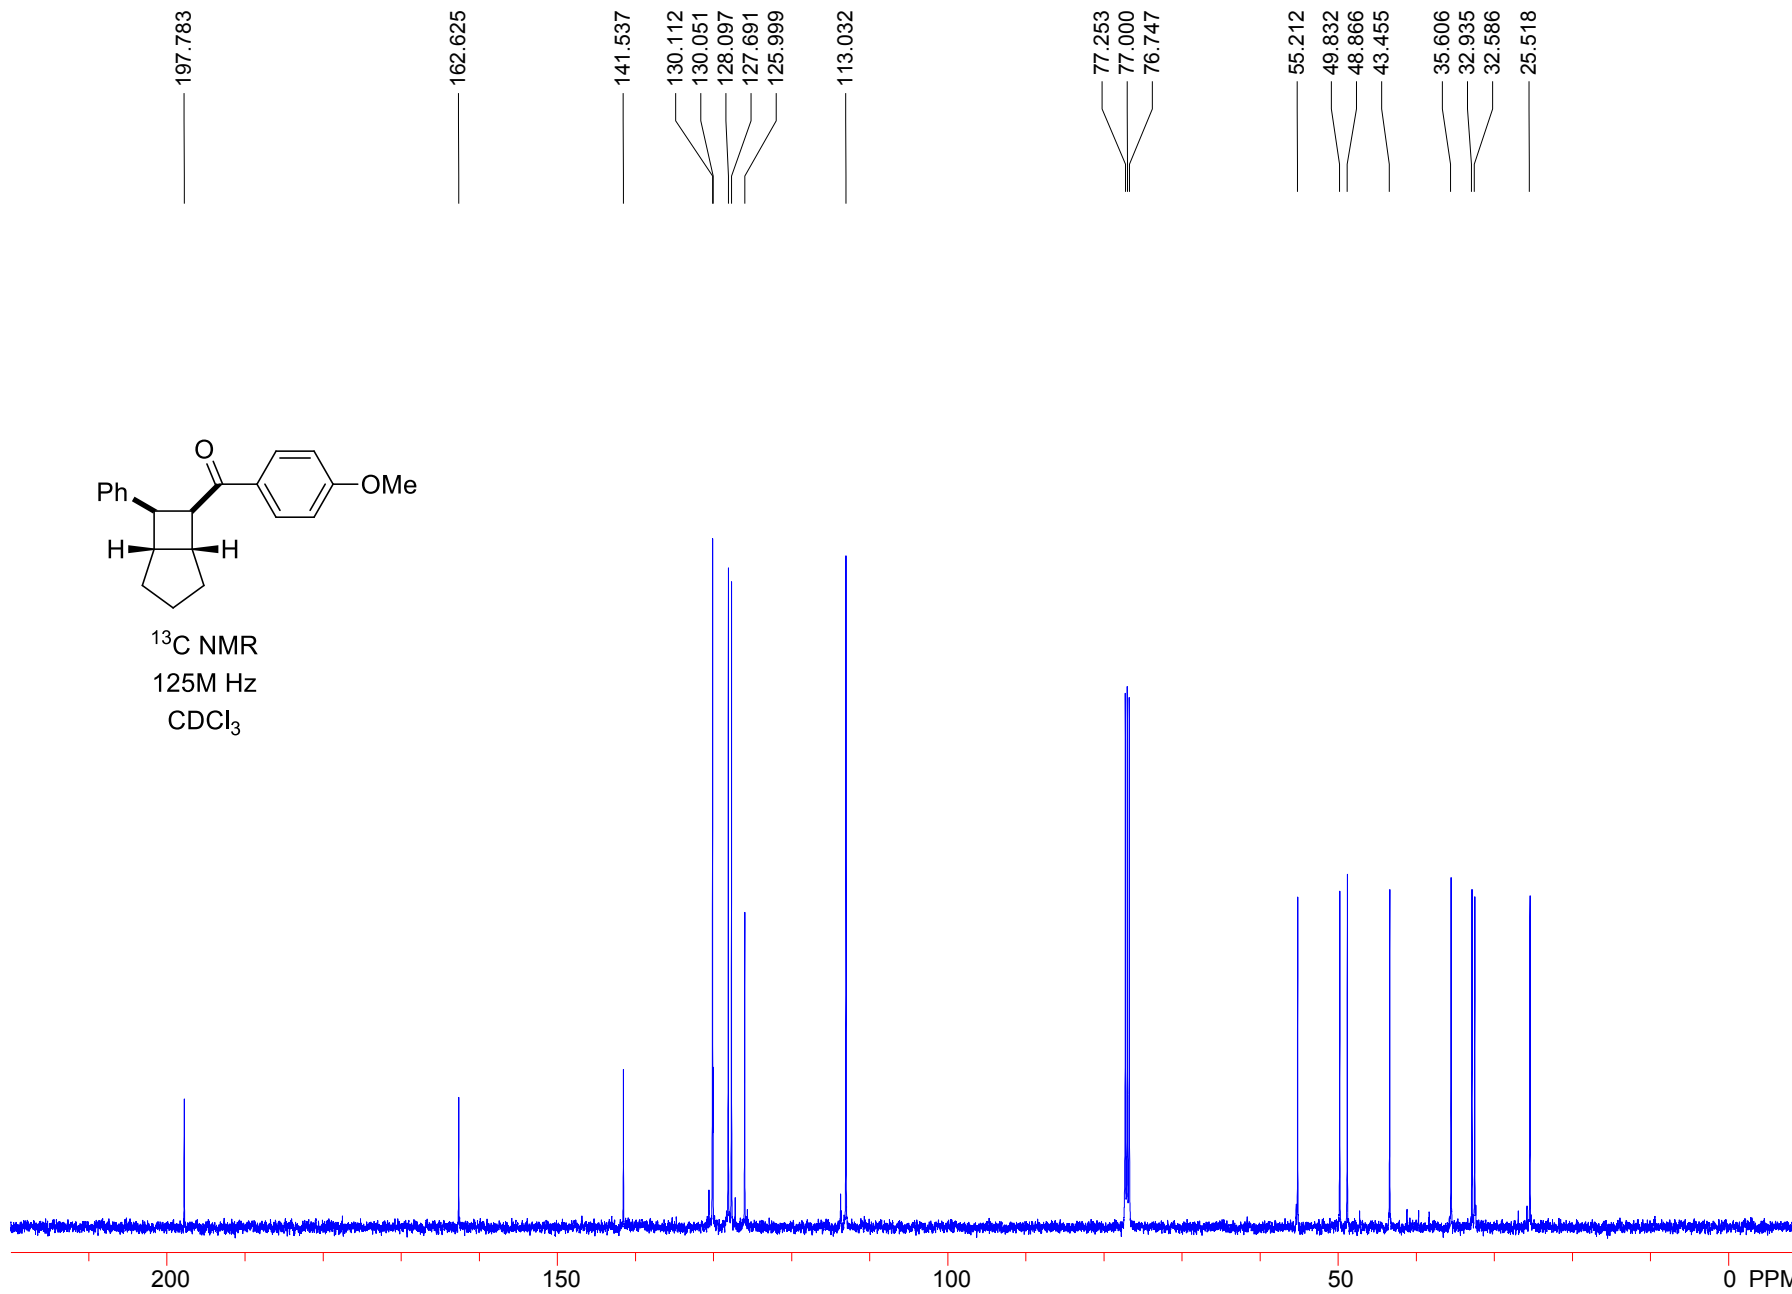



7.335  
7.320  
7.305  
7.281  
7.278  
7.264  
7.251  
7.232  
7.218  
7.203

5.008  
5.004  
4.999  
4.832  
4.827  
4.822  
4.123  
4.104  
4.085  
3.802  
3.797  
3.792  
3.786  
3.644  
3.631  
3.626  
3.613  
3.579  
3.569  
3.560  
3.551  
2.992  
2.982  
2.977  
2.972  
2.967  
2.957

-0.000

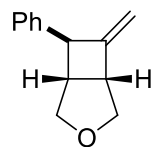

<sup>1</sup>H NMR  
500M Hz  
CDCl<sub>3</sub>

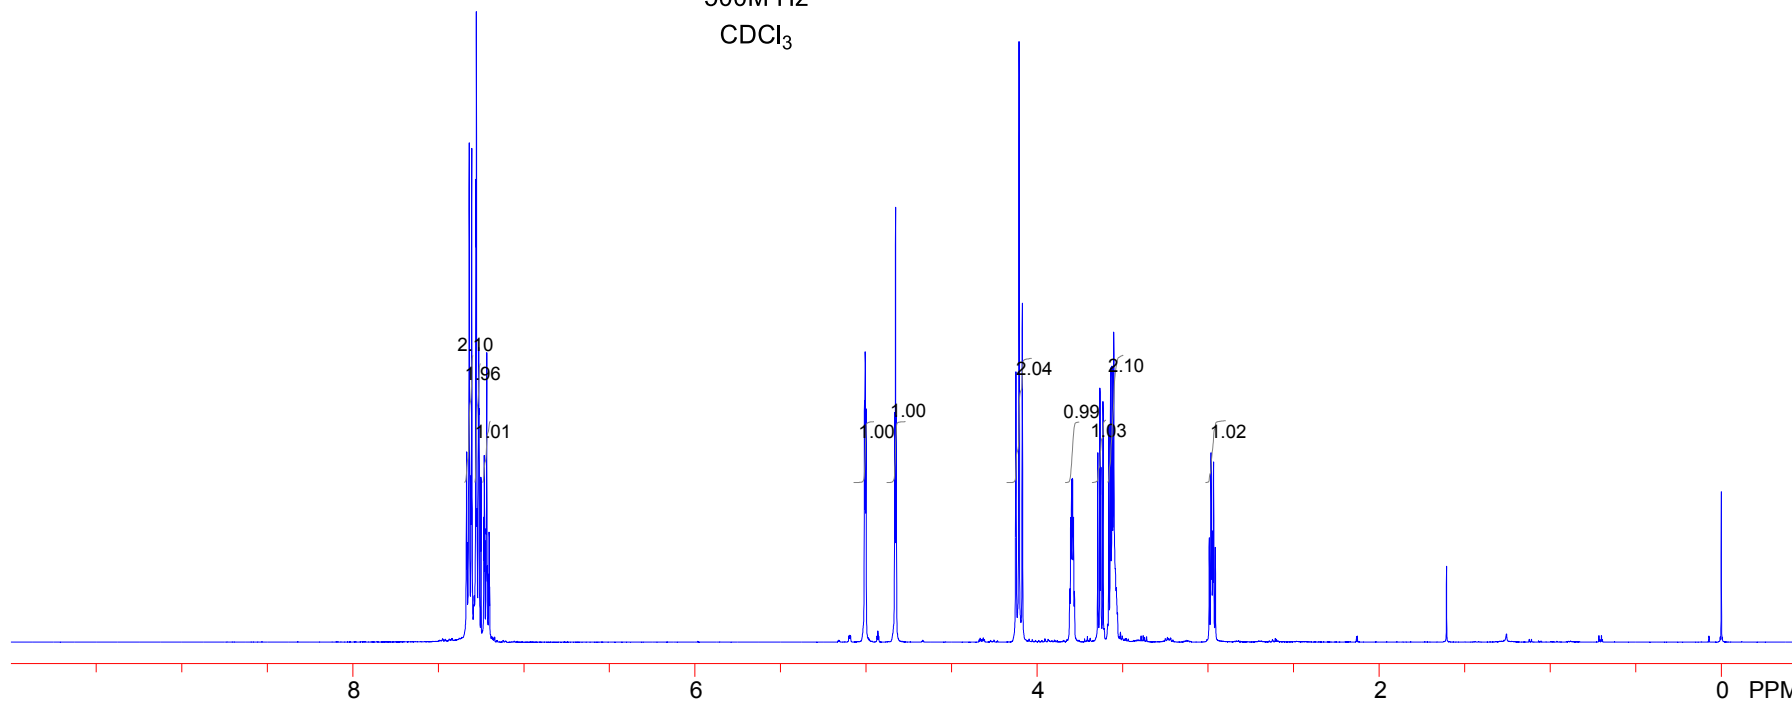

S-89

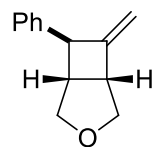

<sup>13</sup>C NMR  
125M Hz  
CDCl<sub>3</sub>

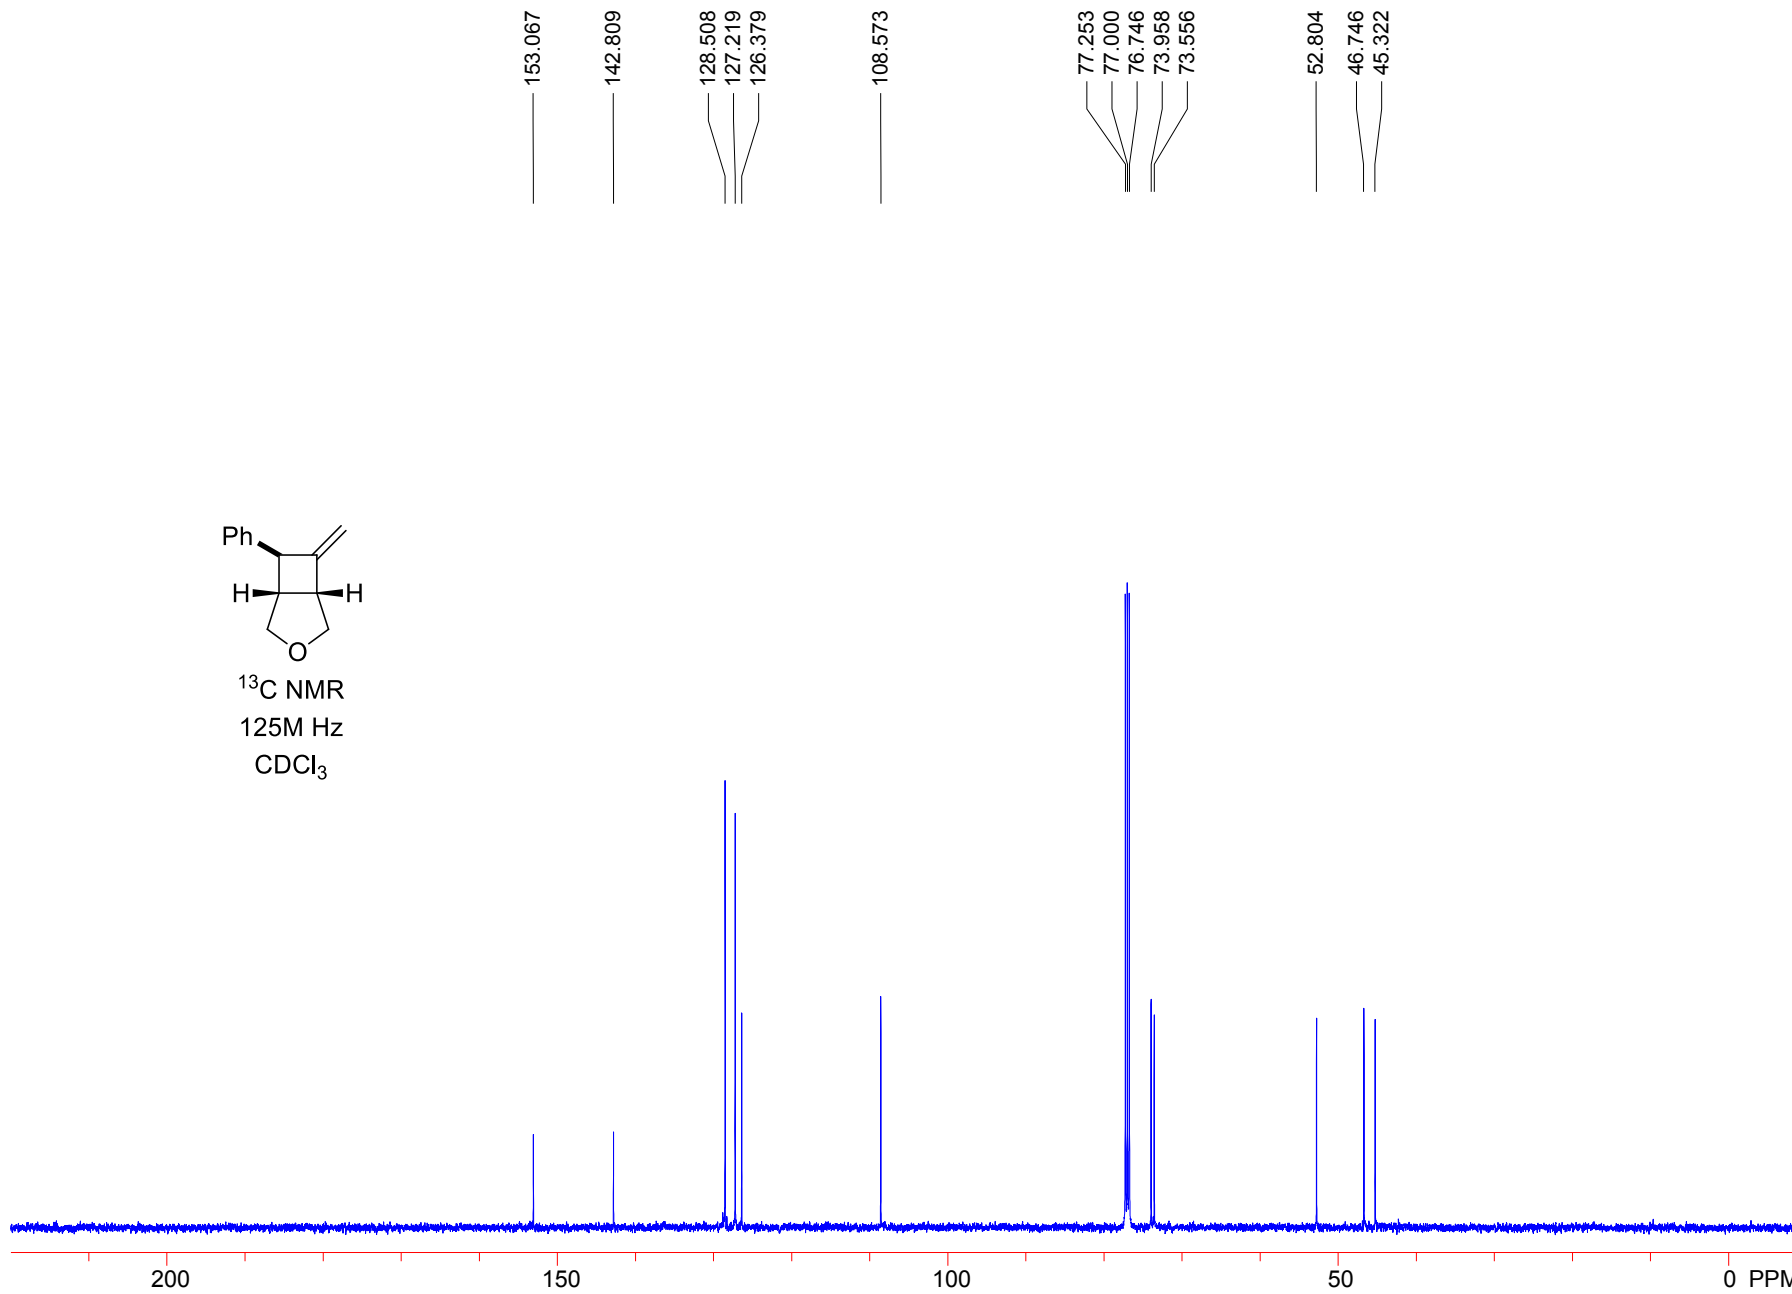

S-90

7.750  
7.734  
7.371  
7.355  
7.254  
7.251  
7.236  
7.217  
7.202  
7.187  
7.139  
7.124  
7.110  
7.094  
7.078  
6.816  
6.801  
6.786  
6.563  
6.548  
4.833  
4.830  
4.818  
4.814

3.796  
3.776  
3.713  
3.706  
3.698  
3.691  
3.642  
3.622  
3.050  
3.045  
3.042  
2.753  
2.741  
2.733  
2.721  
2.709  
2.697  
2.689  
2.448  
1.565  
1.556

0.000

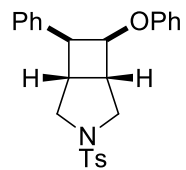

<sup>1</sup>H NMR  
500 MHz  
CDCl<sub>3</sub>

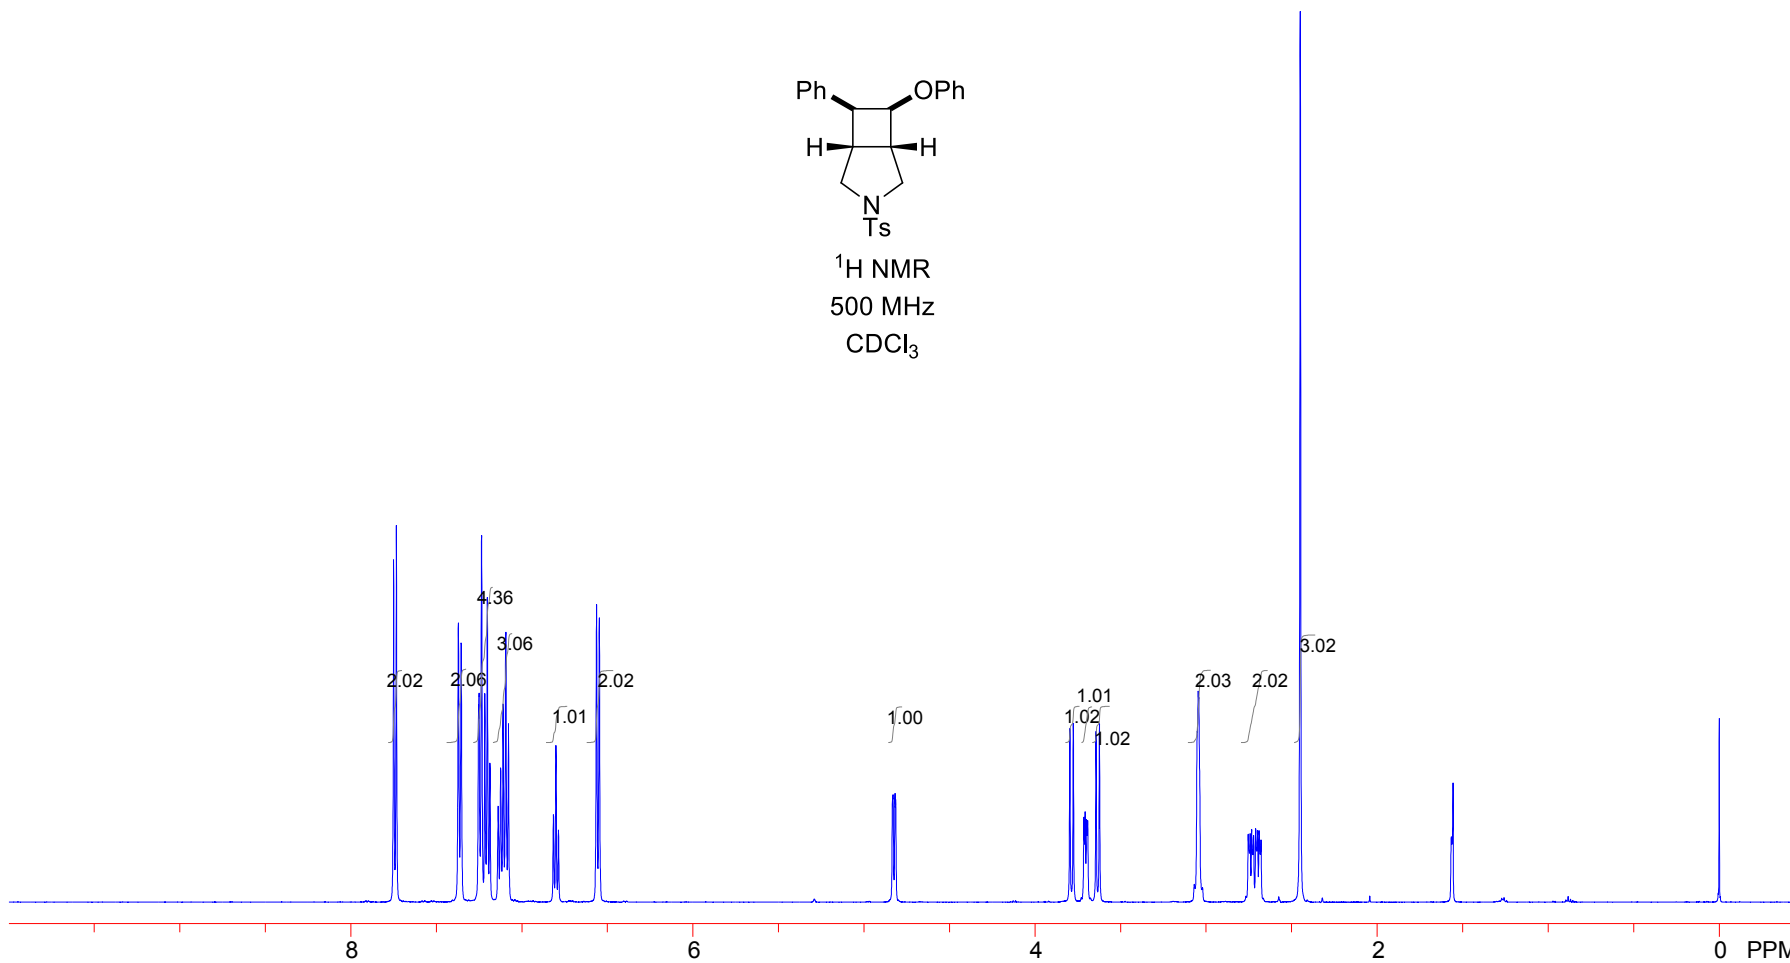

S-91

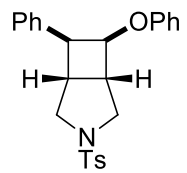

$^{13}\text{C}$  NMR  
125 MHz  
 $\text{CDCl}_3$

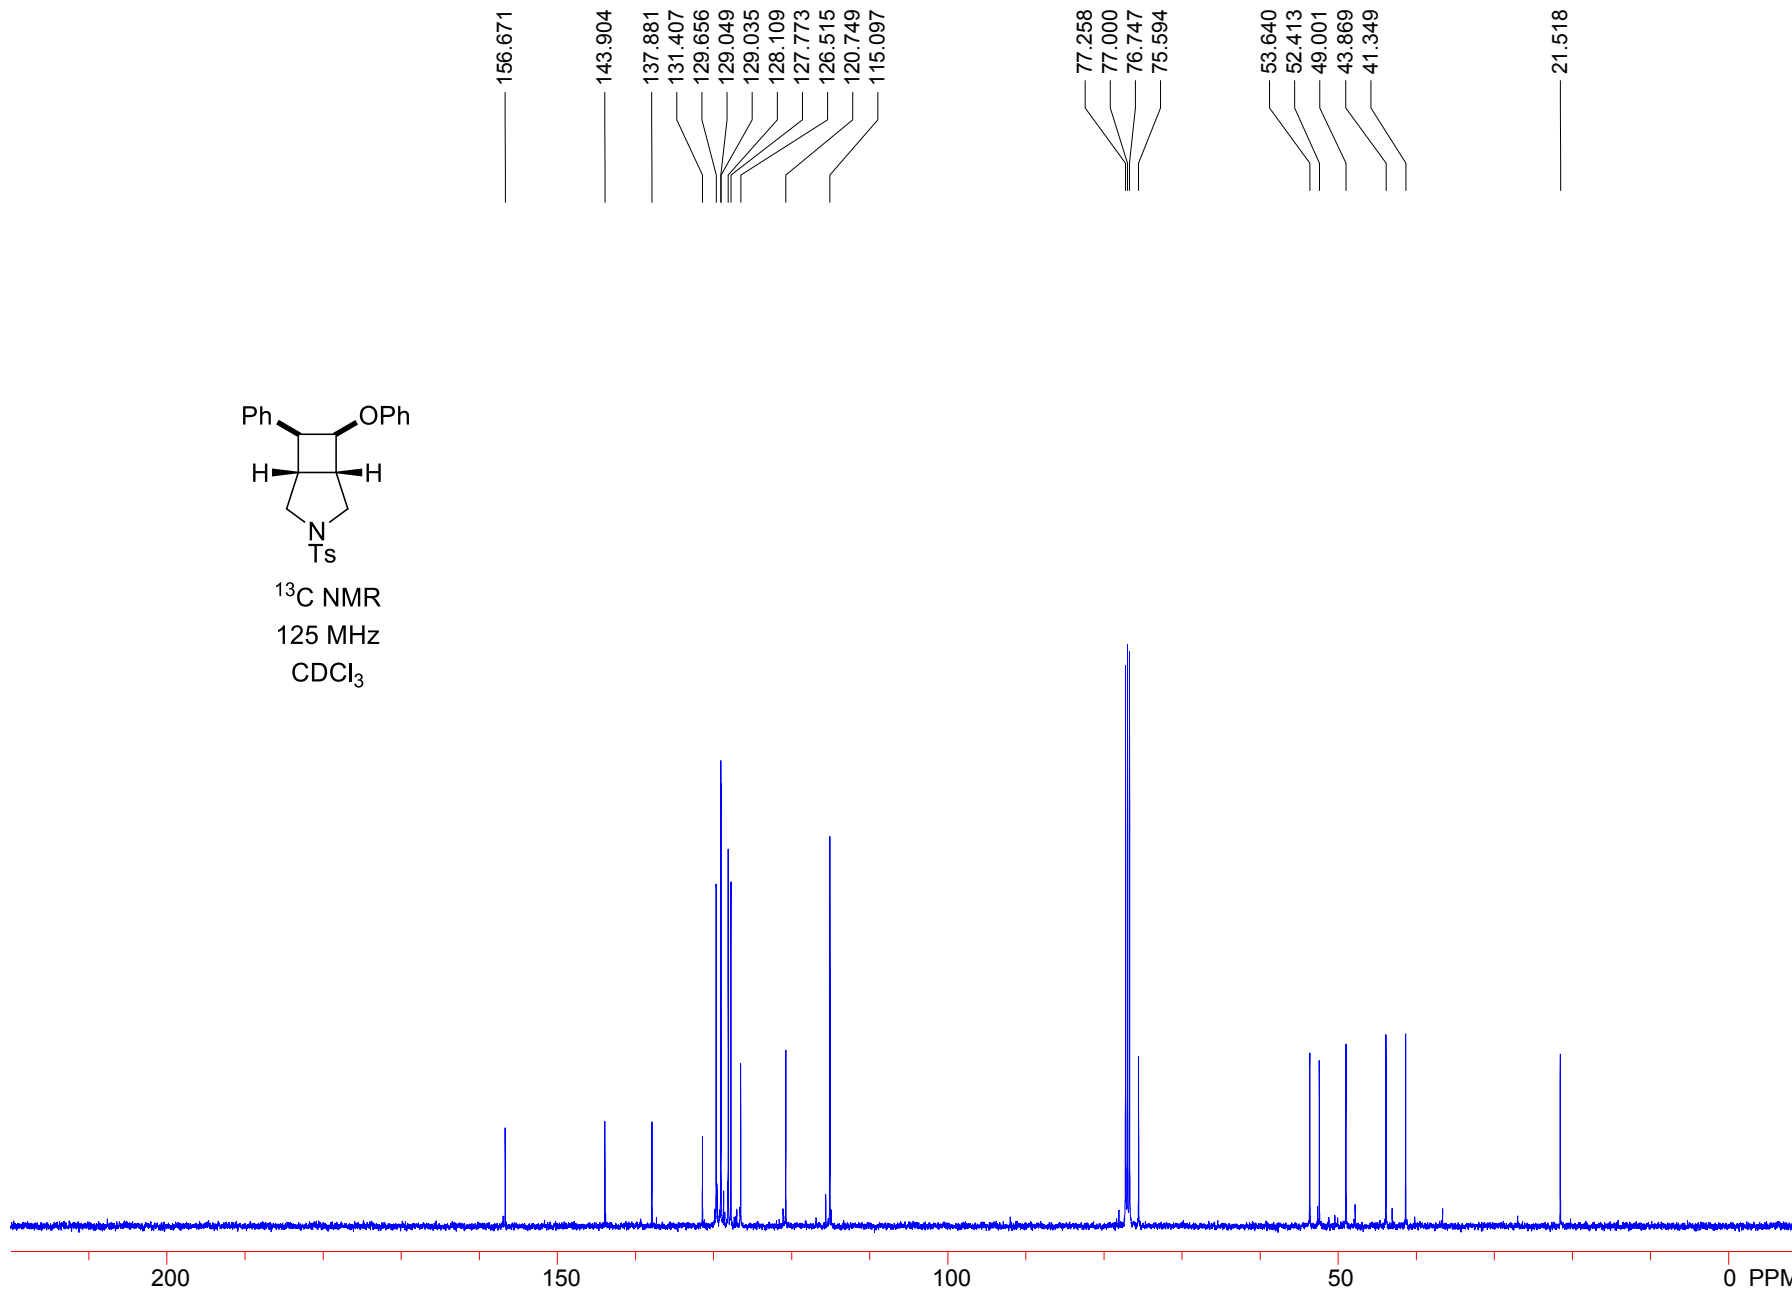

7.746  
7.743  
7.733  
7.730  
7.337  
7.320  
7.307  
7.304  
7.253  
7.249  
7.247  
7.235  
7.218  
7.210  
7.208  
7.203  
7.200  
7.194  
7.186  
6.931  
6.929  
6.917  
6.902  
6.738  
6.736  
6.732  
6.723  
6.720  
6.719  
4.654  
4.639  
4.625  
3.829  
3.825  
3.808  
3.804  
3.627  
3.607  
3.521  
3.506  
3.492  
3.262  
3.248  
3.245  
2.917  
2.907  
2.897  
2.890  
2.887  
2.872  
2.869  
2.851  
2.721  
2.711  
2.434  
1.577  
0.000

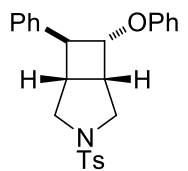

<sup>1</sup>H NMR  
500 MHz  
CDCl<sub>3</sub>

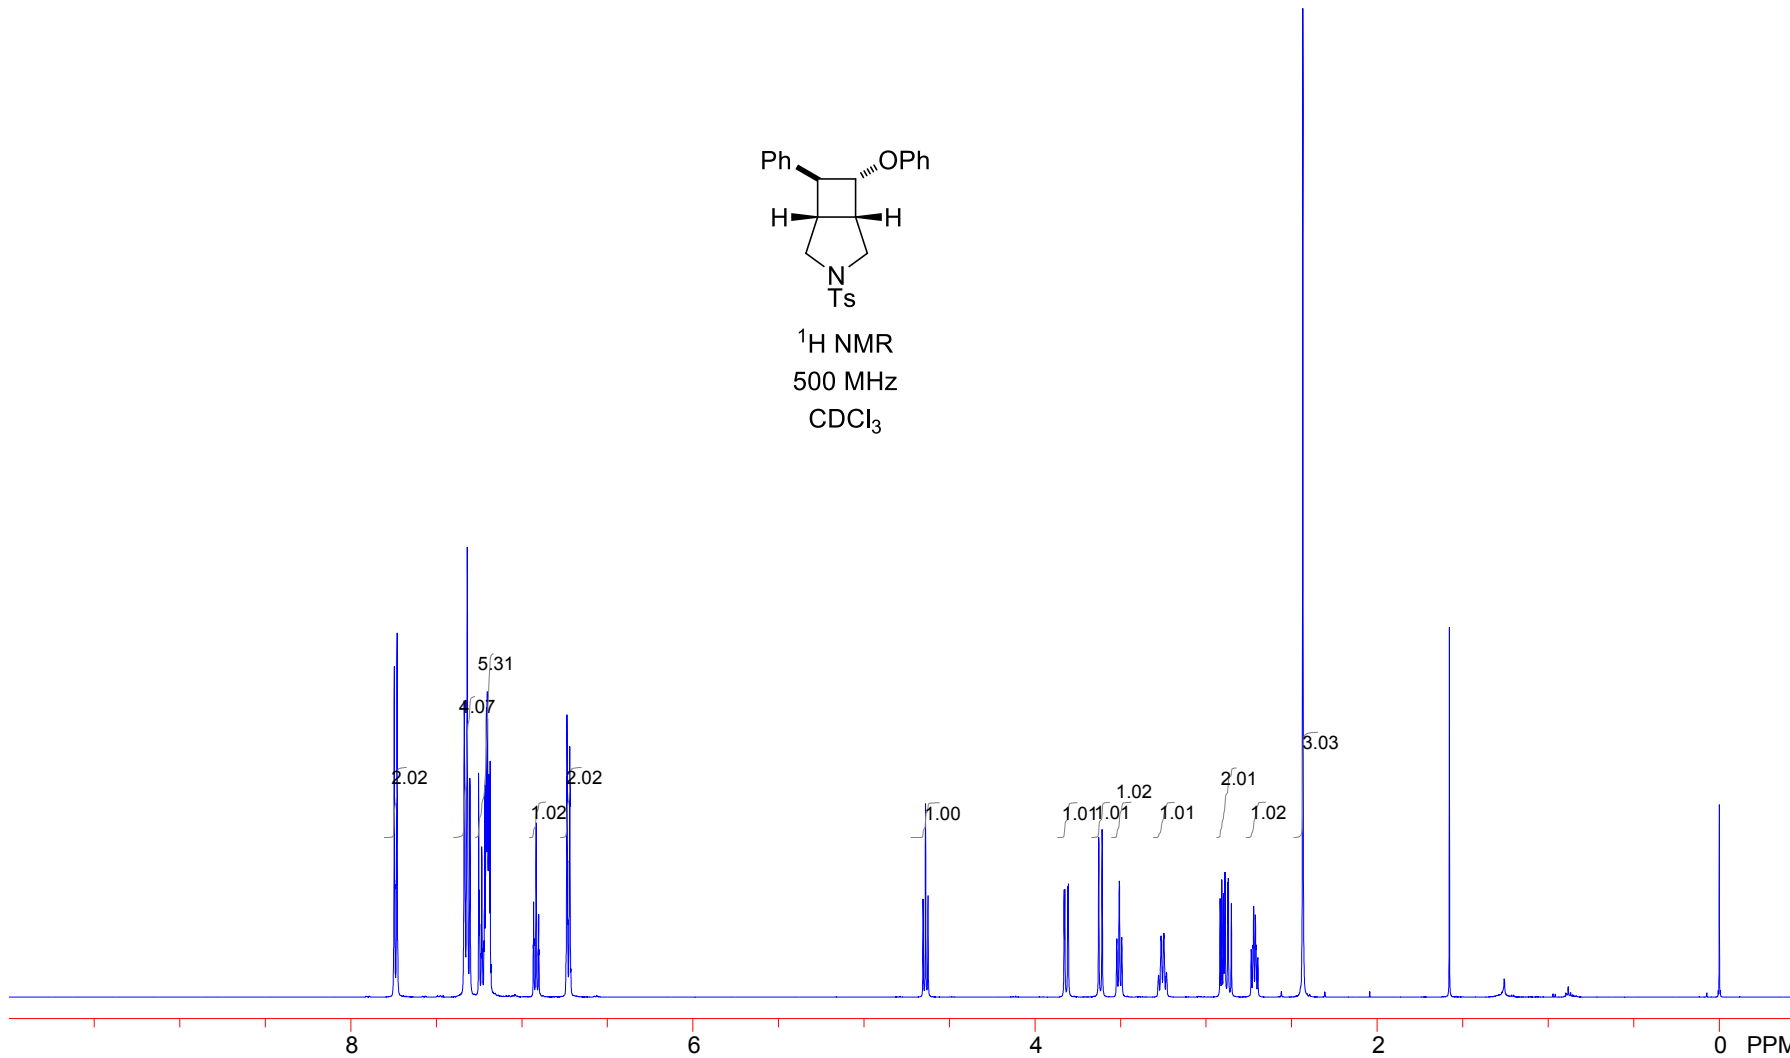

S-93

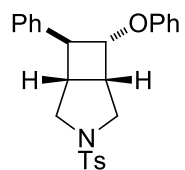

$^{13}\text{C}$  NMR  
125 MHz  
 $\text{CDCl}_3$

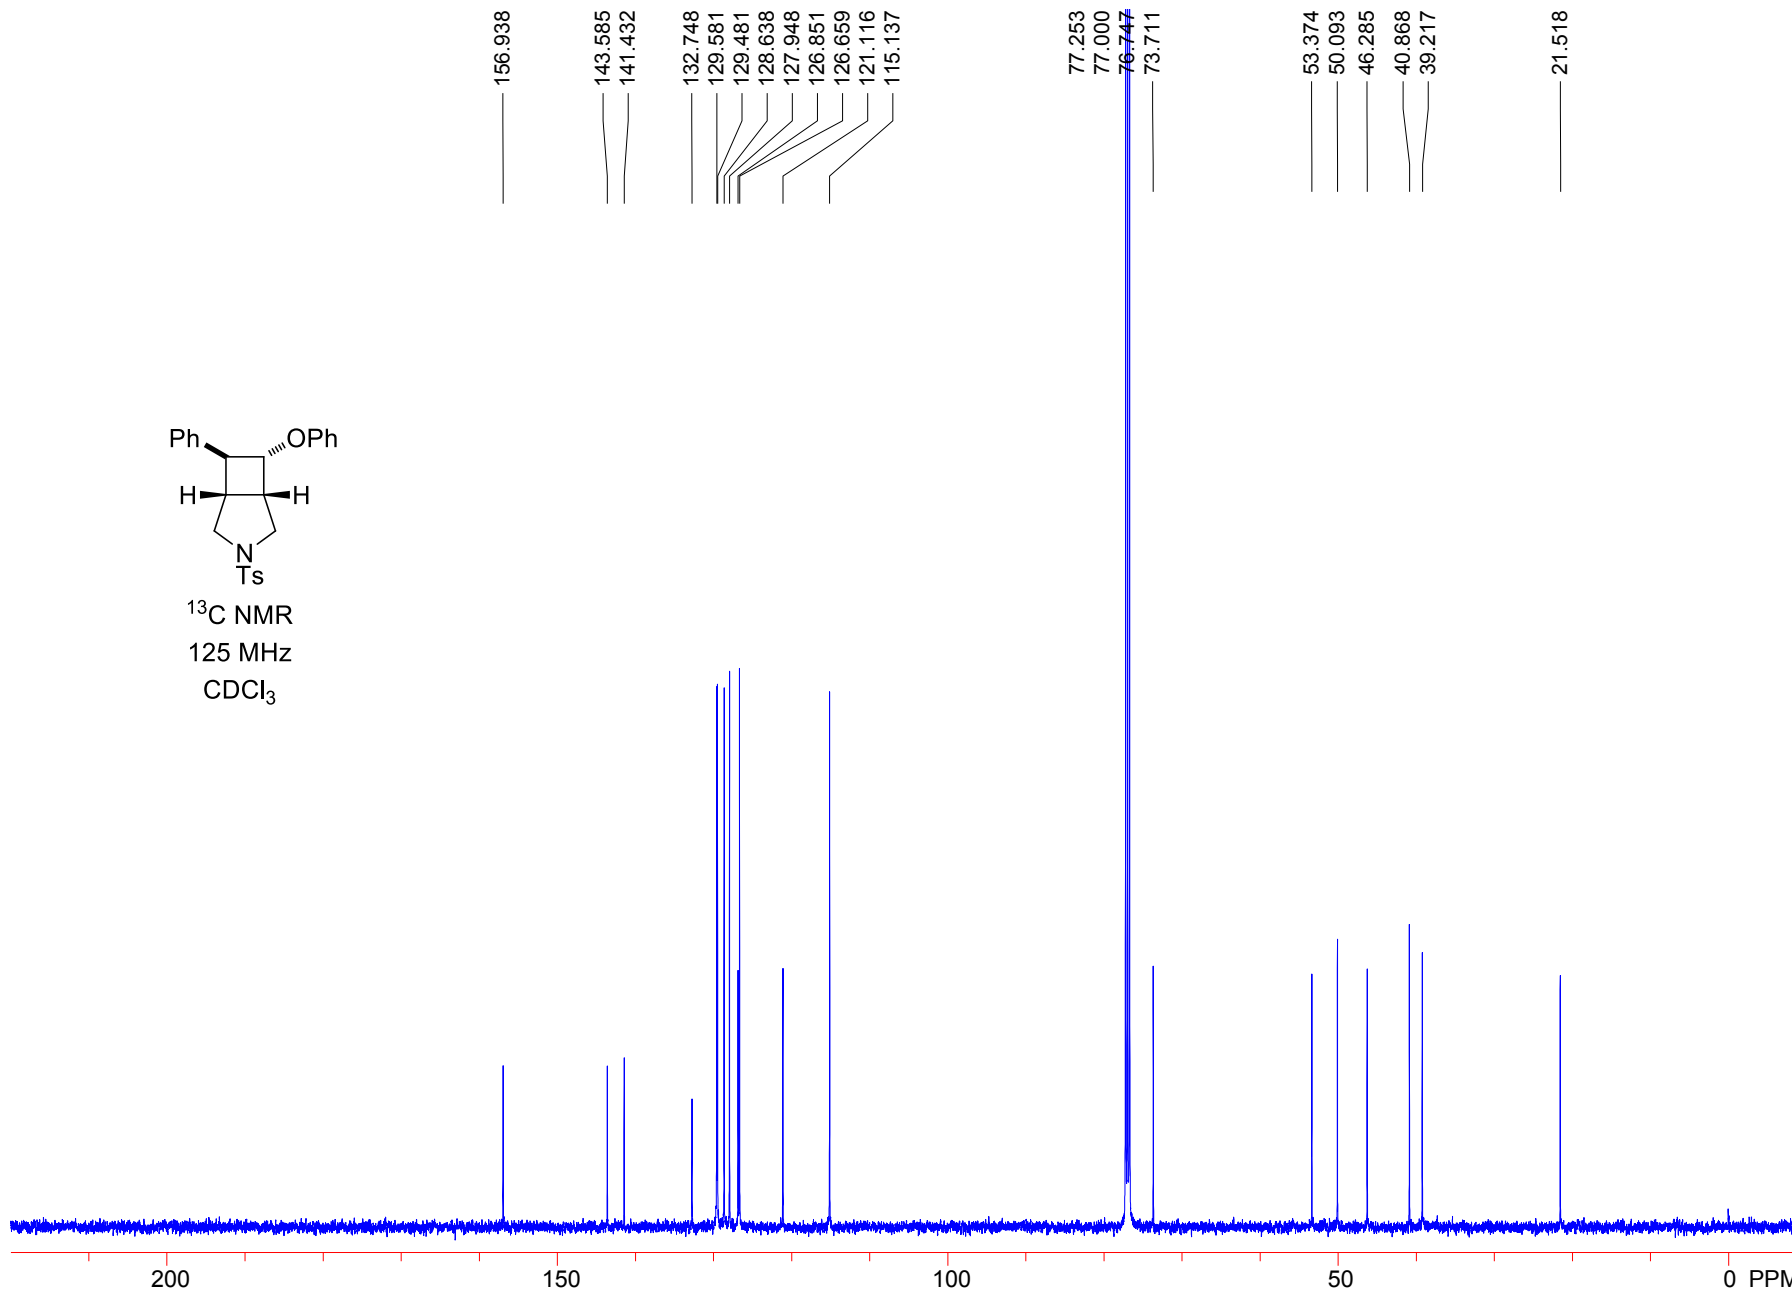

7.394  
7.390  
7.379  
7.377  
7.369  
7.364  
7.324  
7.310  
7.304  
7.295  
7.249

3.753  
3.737  
3.353  
3.338  
3.320  
3.314  
3.300  
3.287

2.299  
2.296  
2.275  
2.271  
2.268  
1.970  
1.958  
1.947  
1.941  
1.936  
1.931  
1.926  
1.918  
1.822  
1.803  
1.720  
1.709  
1.686  
1.674  
1.670  
-0.000

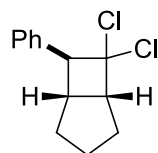

<sup>1</sup>H NMR  
500M Hz  
CDCl<sub>3</sub>

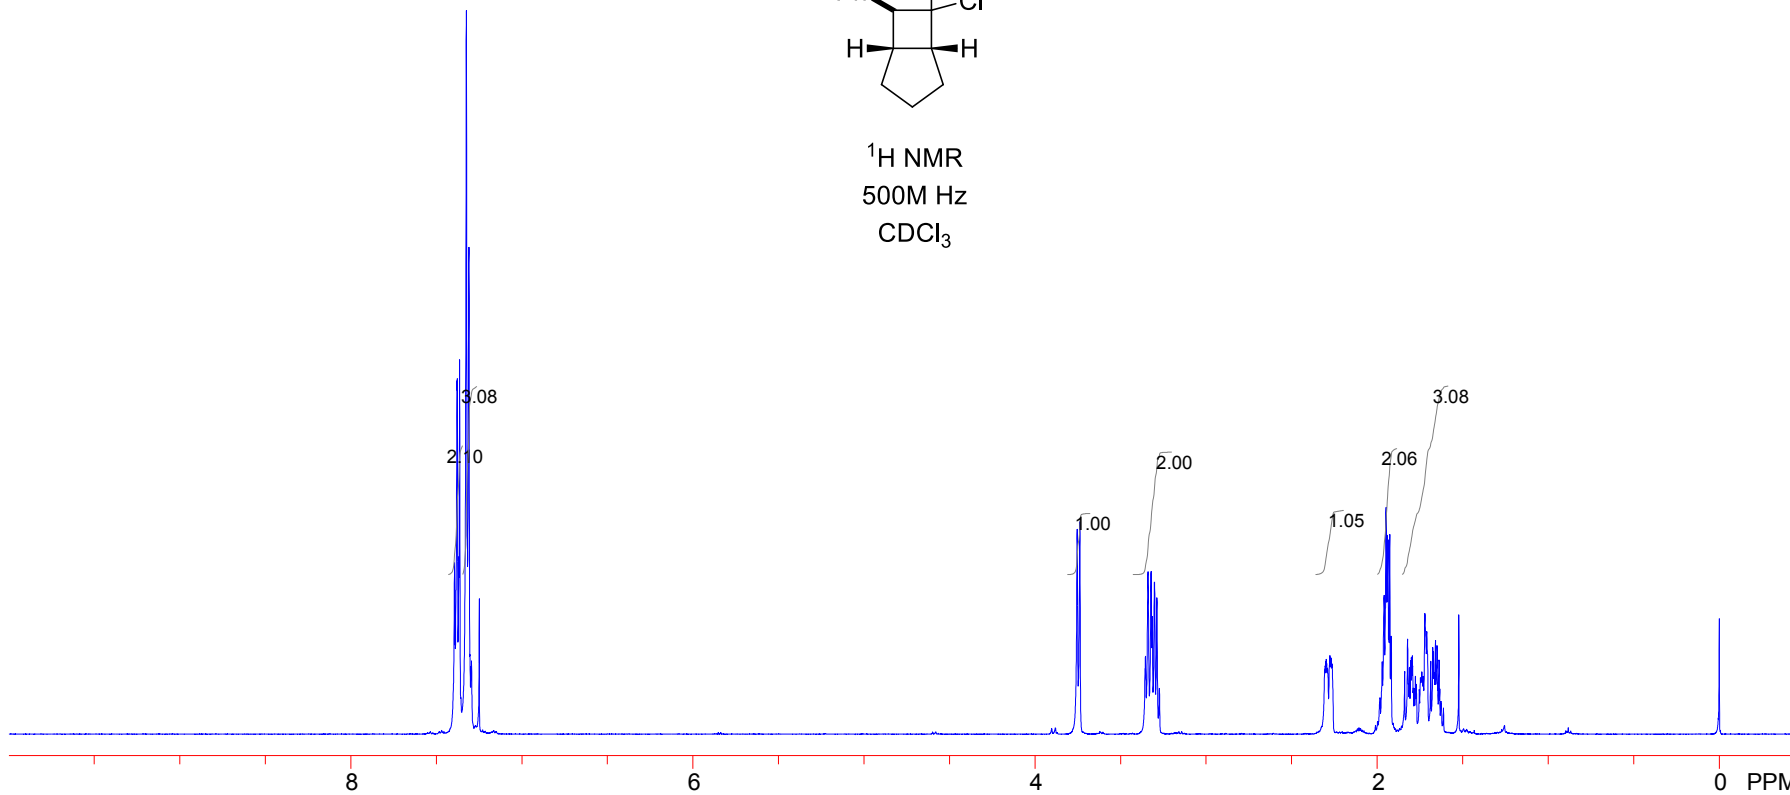

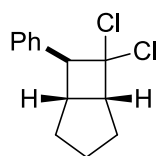

$^{13}\text{C}$  NMR  
125M Hz  
 $\text{CDCl}_3$

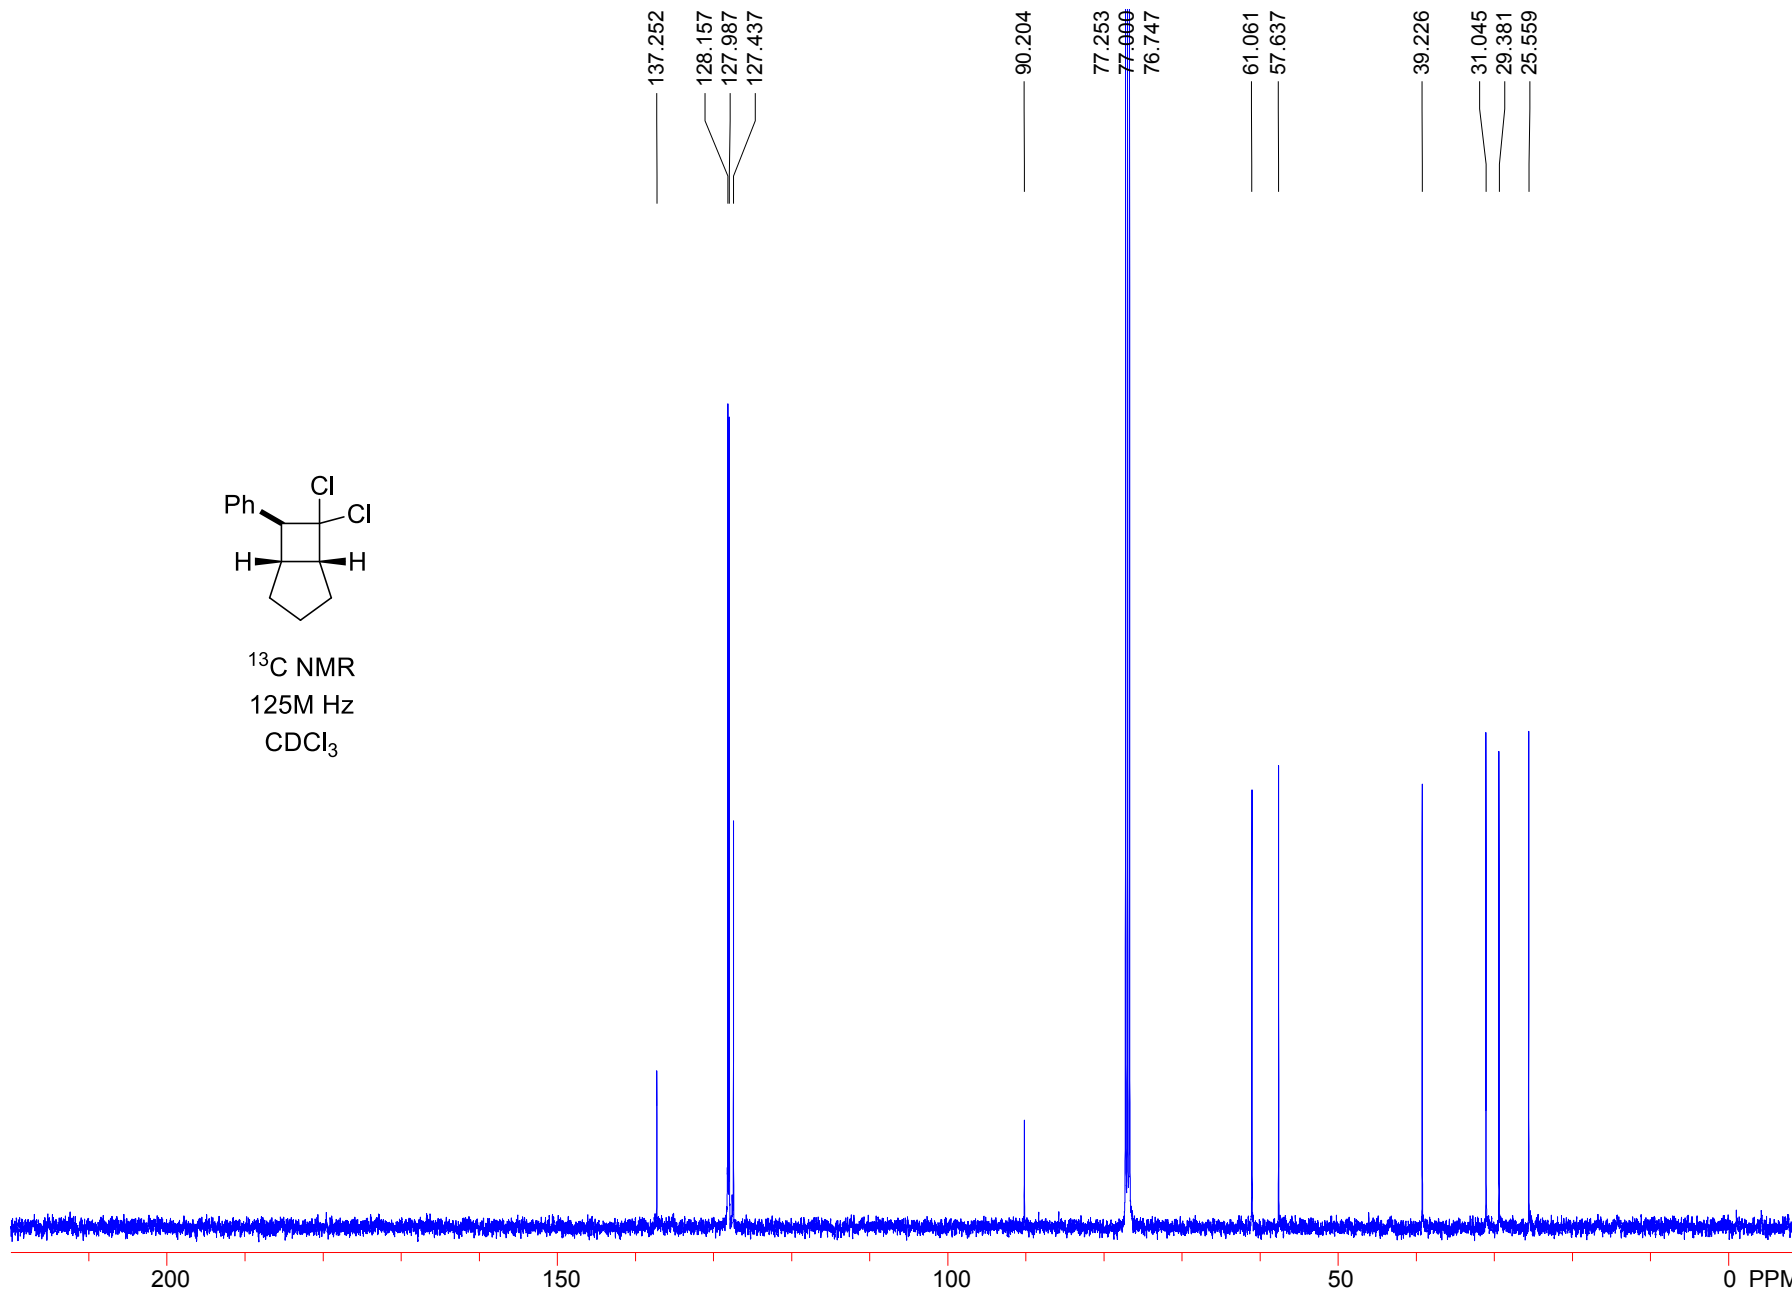



7.723  
7.706  
7.377  
7.363  
7.347  
7.312  
7.310  
7.307  
7.299  
7.295  
7.160  
7.158  
7.144

4.919  
4.910  
4.901  
4.892

3.675  
3.655  
3.587  
3.576  
3.567  
3.326  
3.283  
2.720  
2.707  
2.699  
2.687  
2.606  
2.593  
2.585  
2.572  
2.443  
2.426

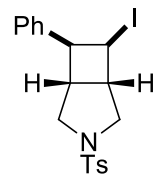

<sup>1</sup>H NMR  
500M Hz  
CDCl<sub>3</sub>

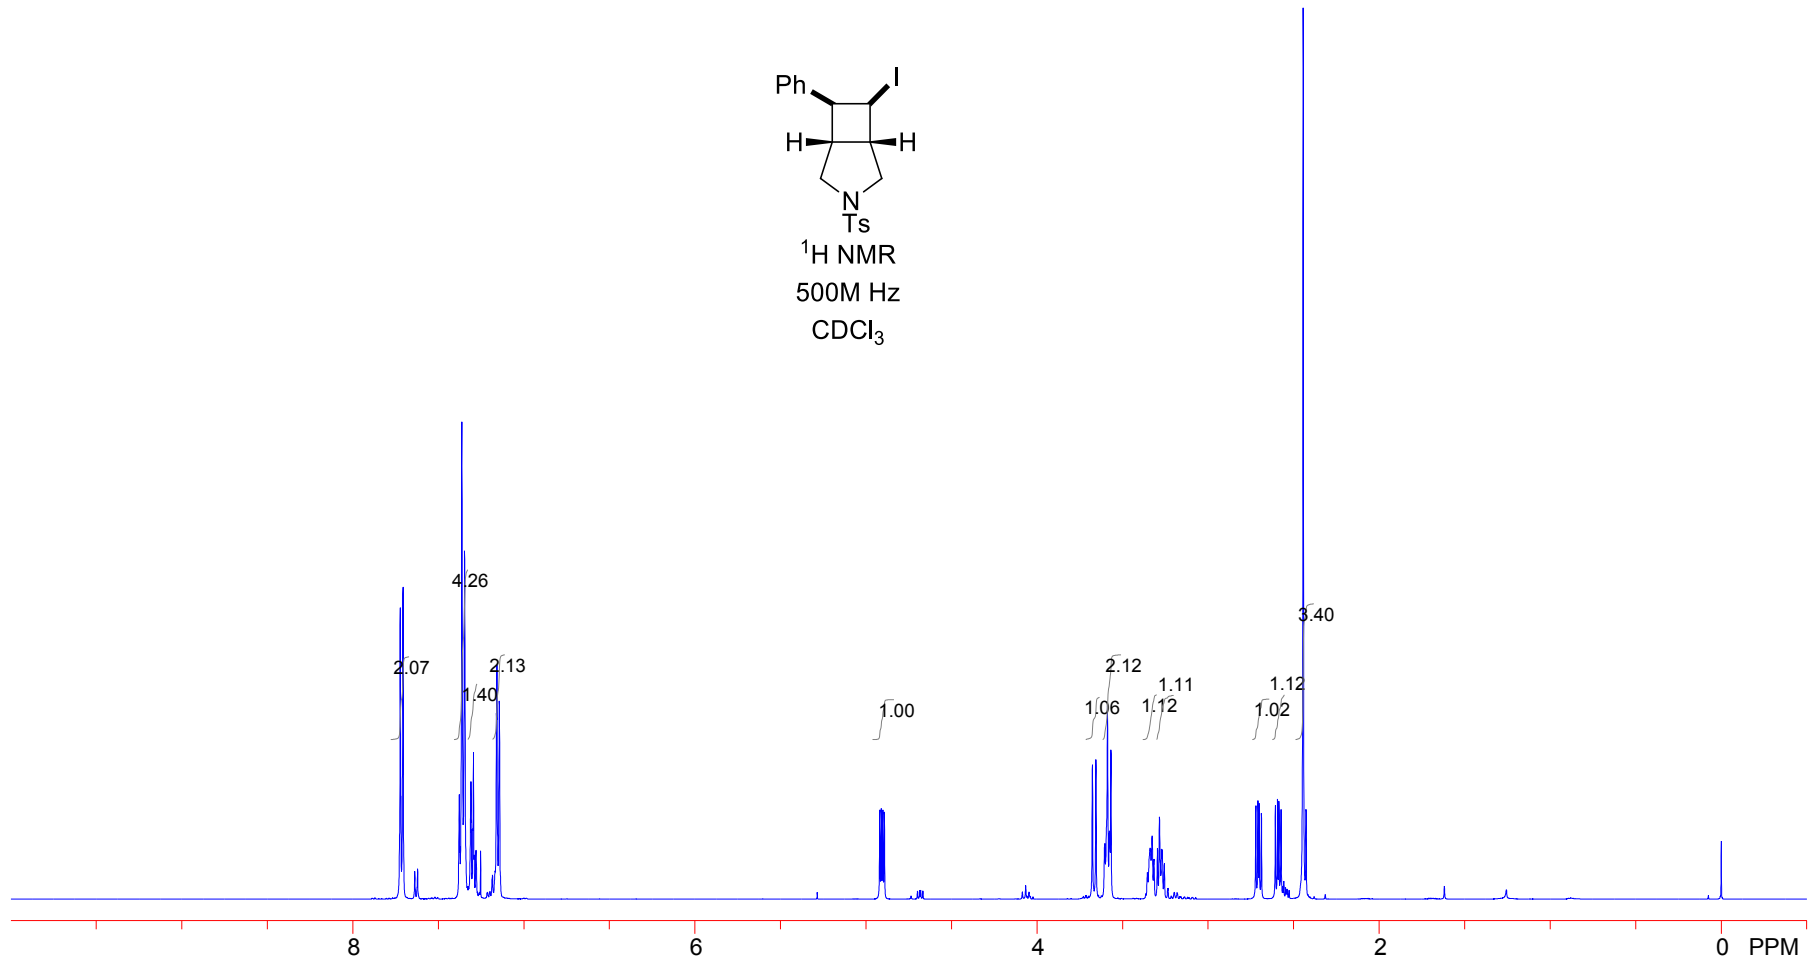

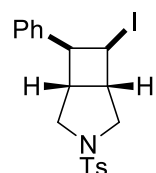

$^{13}\text{C}$  NMR  
125M Hz  
 $\text{CDCl}_3$

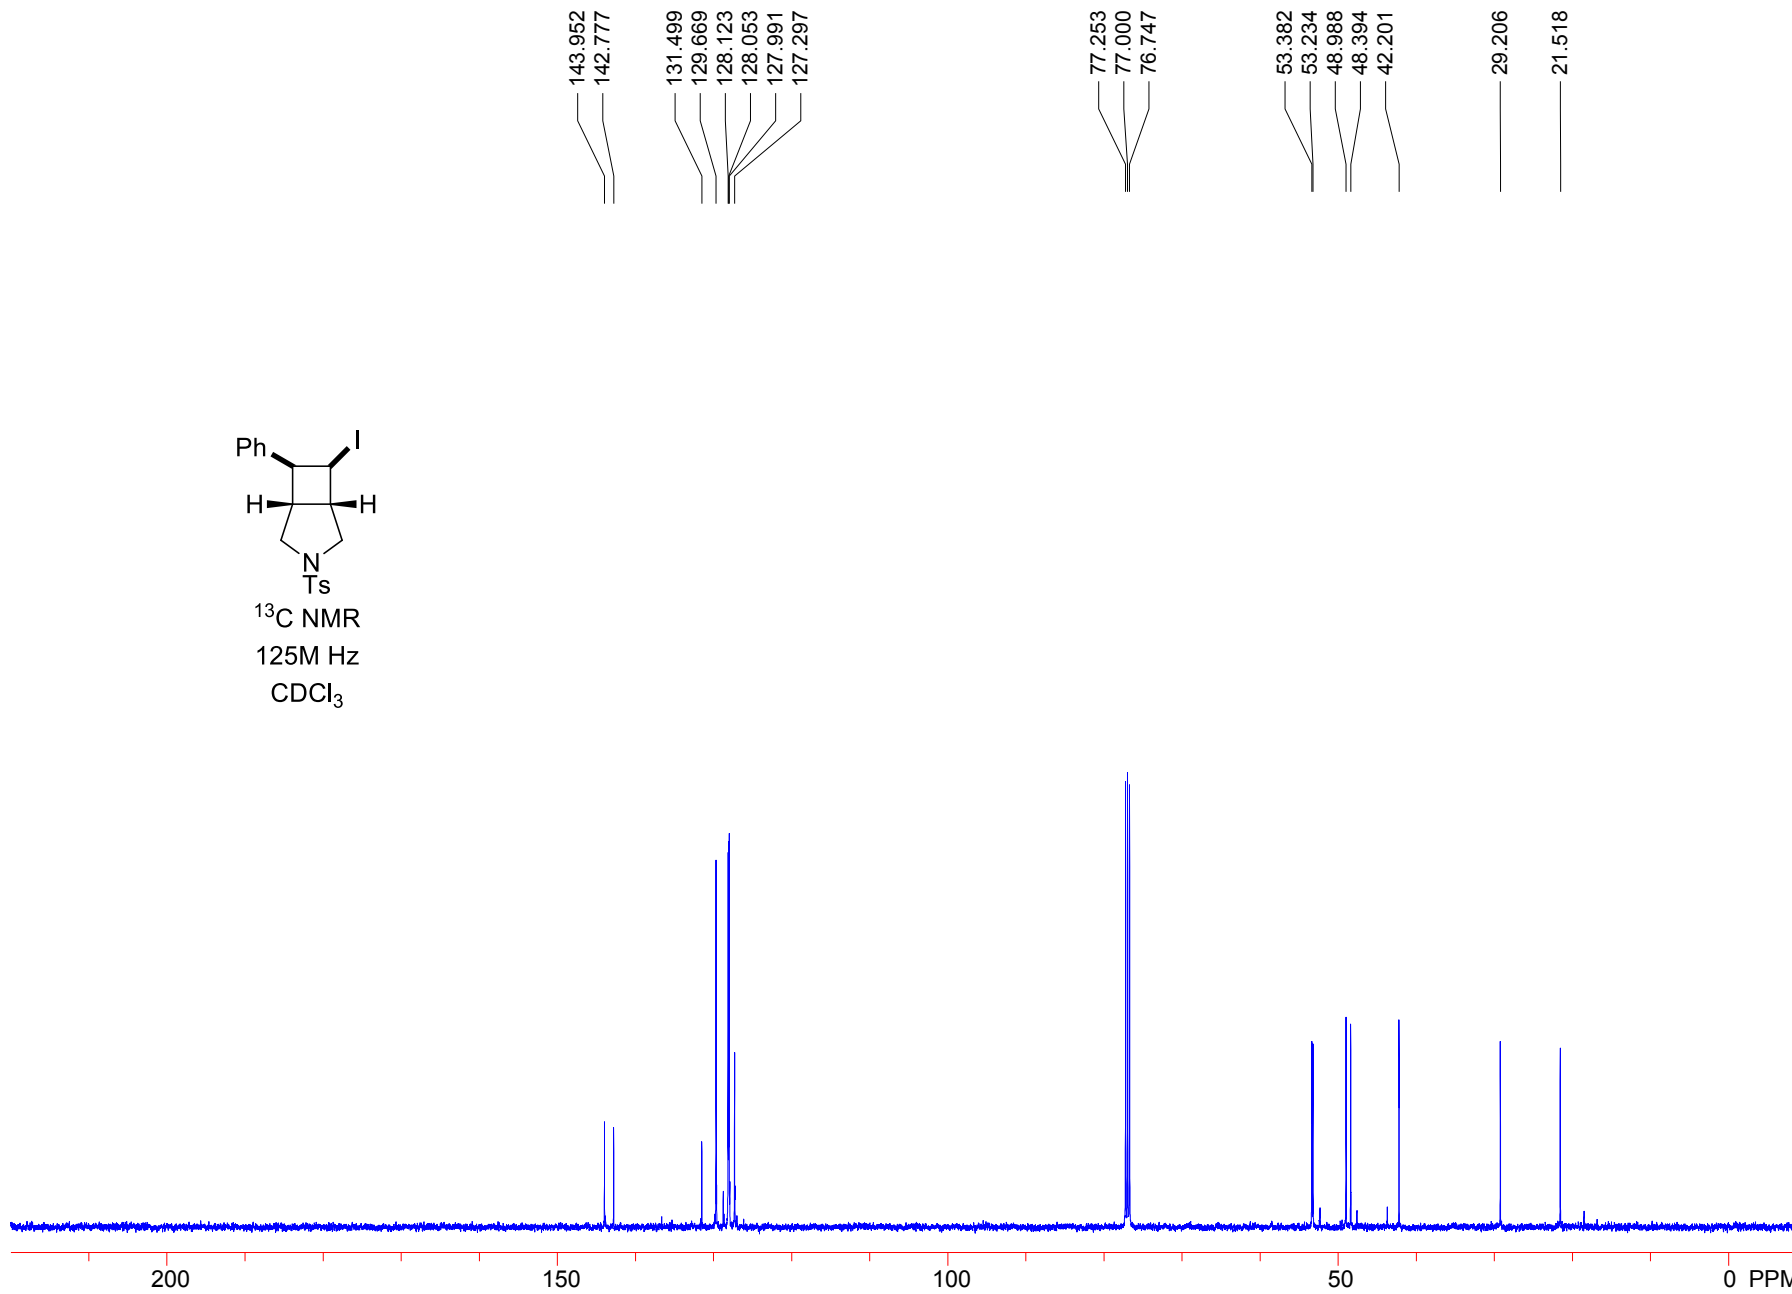

7.795  
7.778  
7.372  
7.356  
7.355  
7.340  
7.325  
7.283  
7.269  
7.259  
7.225  
7.223  
7.209

4.745  
4.728  
4.711  
3.938  
3.935  
3.917  
3.914  
3.749  
3.734  
3.718  
3.594  
3.574  
3.195  
3.192  
3.182  
3.179  
3.169  
3.088  
3.072  
3.067  
3.050  
2.971  
2.957  
2.794  
2.783  
2.774  
2.764  
2.451

-0.000

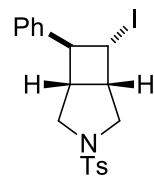

<sup>1</sup>H NMR  
500M Hz  
CDCl<sub>3</sub>

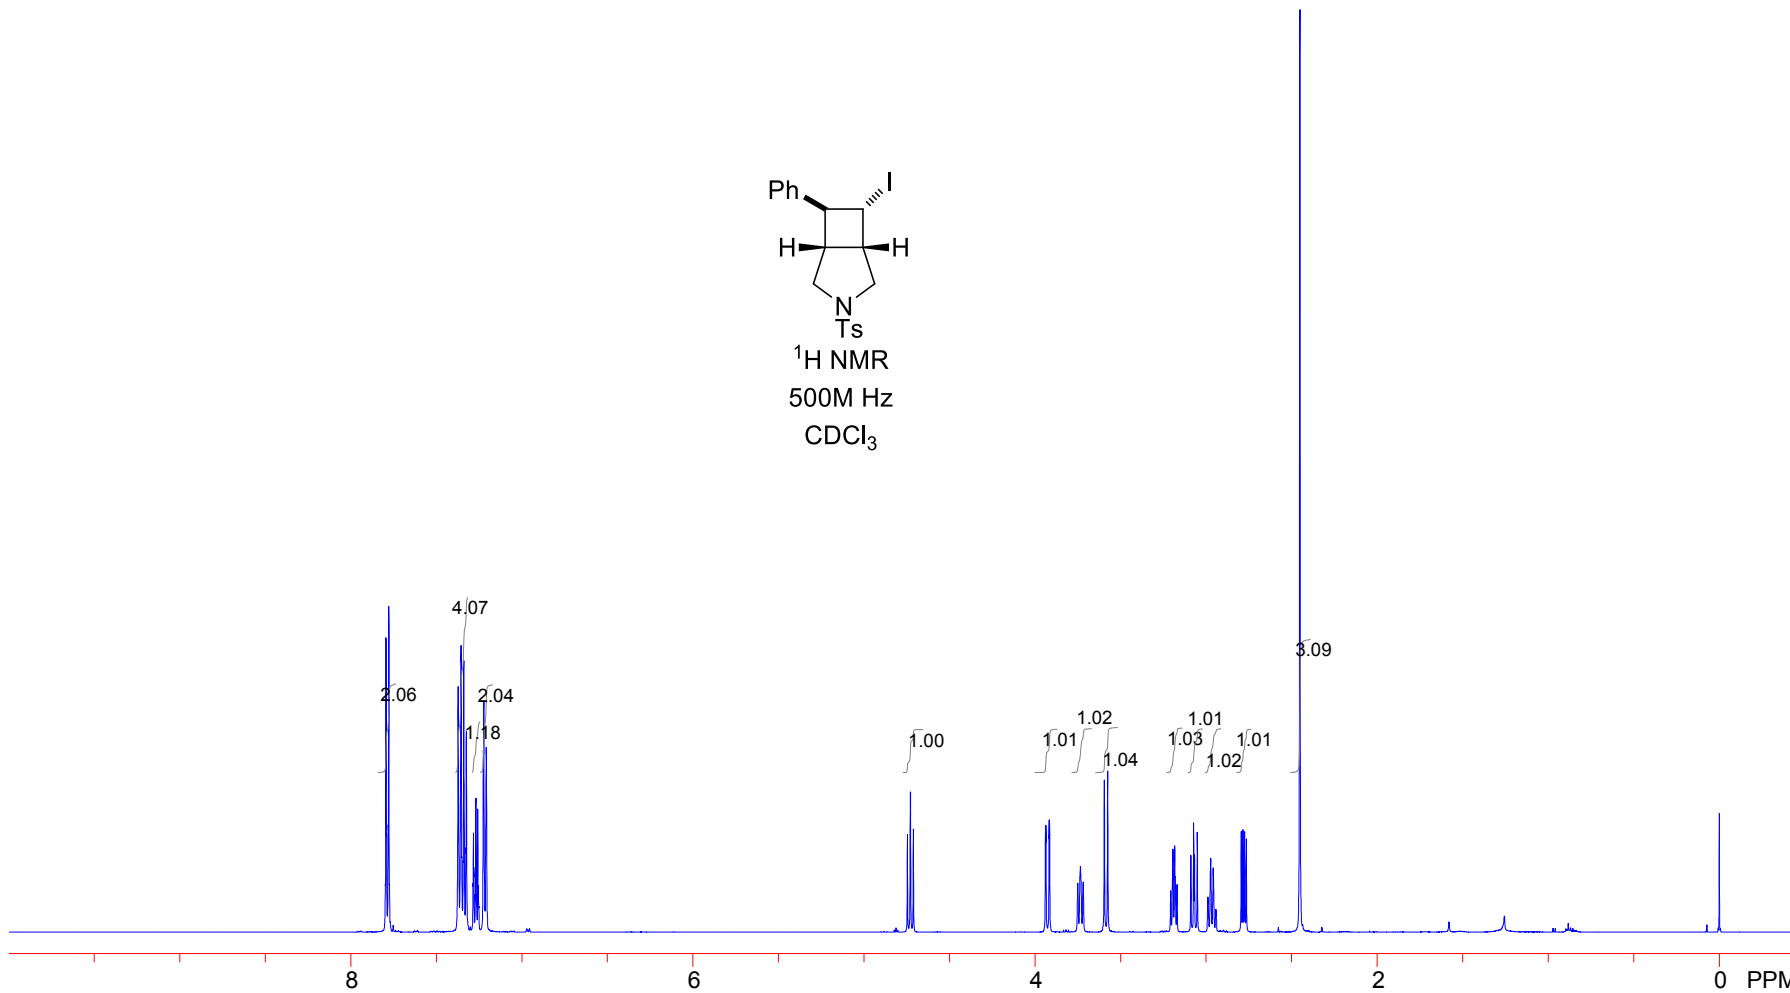

S-99

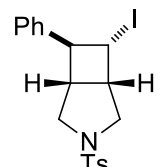

$^{13}\text{C}$  NMR  
125M Hz  
 $\text{CDCl}_3$

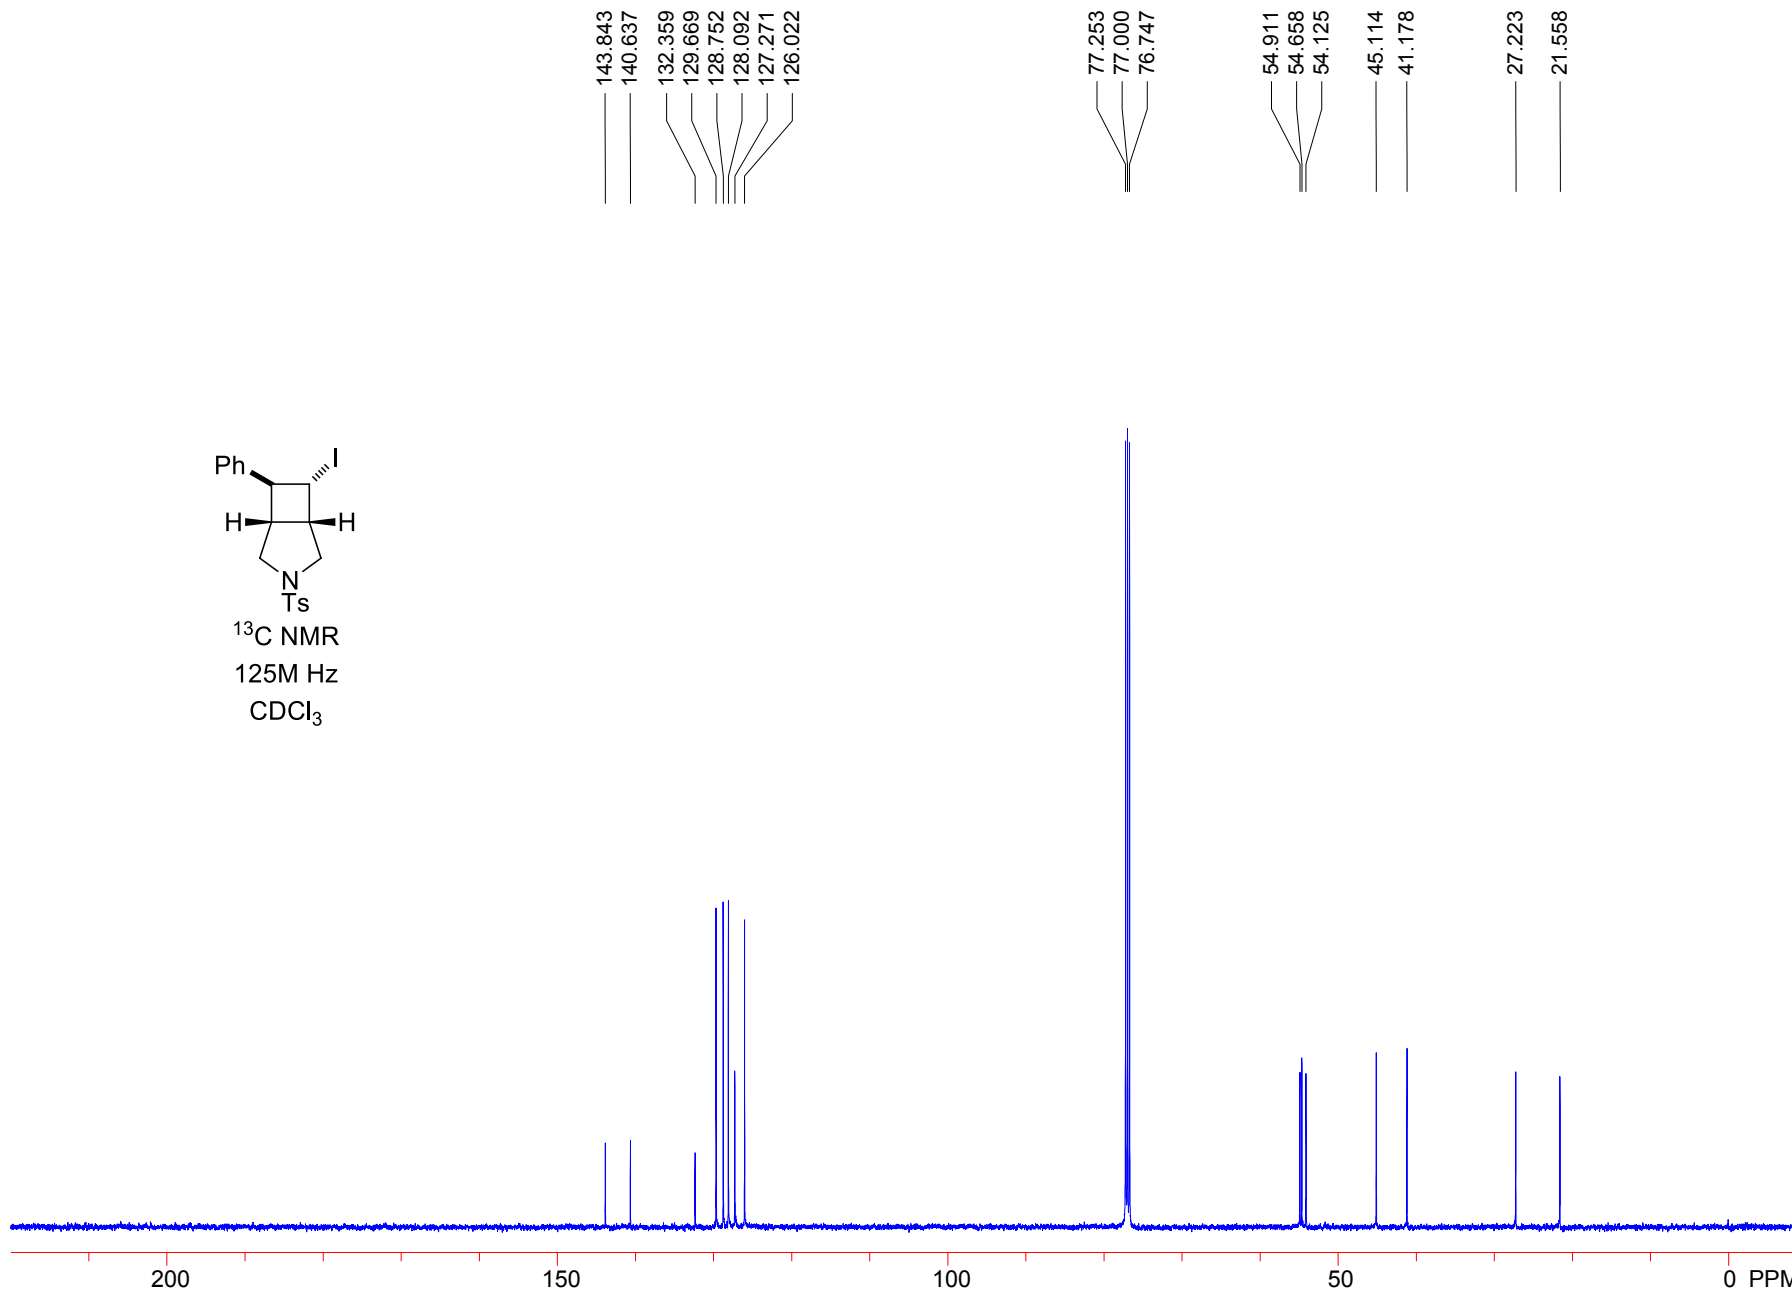

7.349  
7.346  
7.333  
7.323  
7.319  
7.292  
7.289  
7.279  
7.242  
7.235  
7.231  
7.222  
7.218  
7.211  
7.208  
7.196  
7.193  
7.190  
6.886  
6.880  
6.875  
6.866  
6.863  
5.089  
4.018  
4.000  
3.911  
3.900  
3.893  
3.882  
3.793  
3.786  
3.414  
3.403  
3.189  
3.177  
3.174  
3.125  
3.114  
3.101  
2.448  
2.434  
2.431  
2.418  
1.598  
0.000

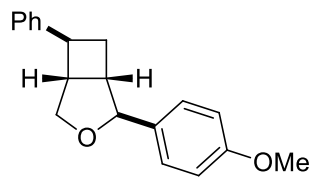

<sup>1</sup>H NMR  
500M Hz  
CDCl<sub>3</sub>

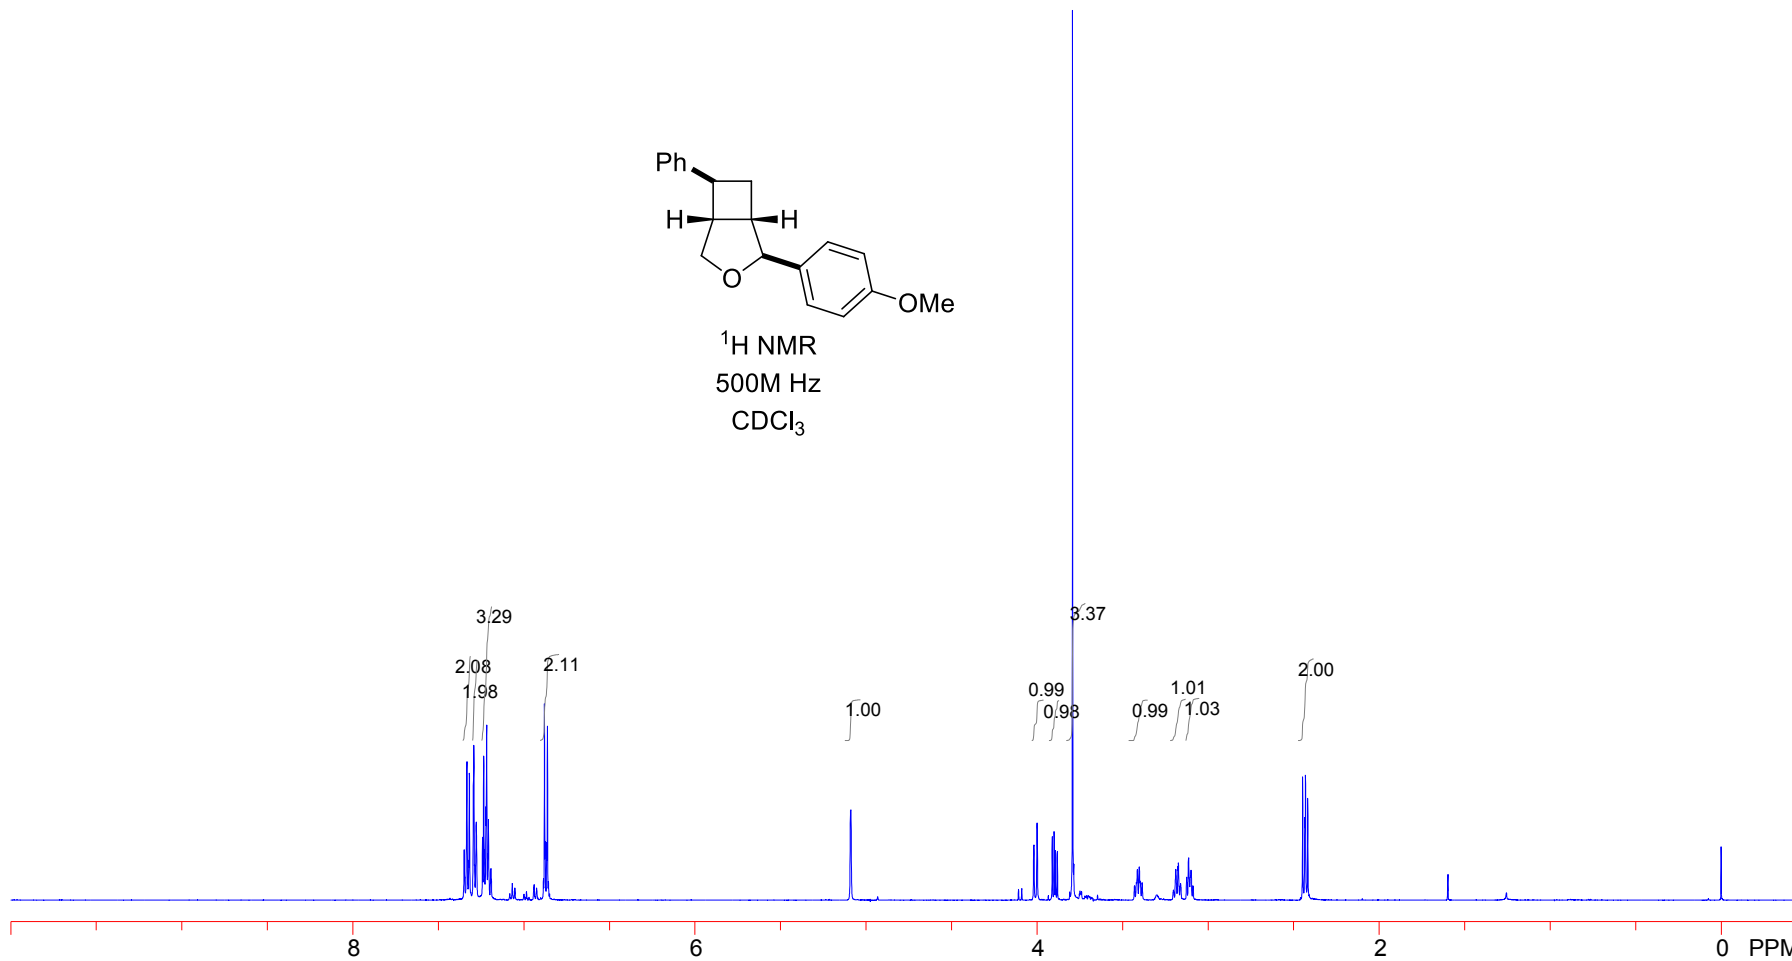

S-101

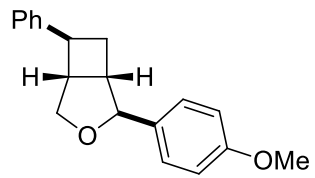

<sup>13</sup>C NMR  
125M Hz  
CDCl<sub>3</sub>

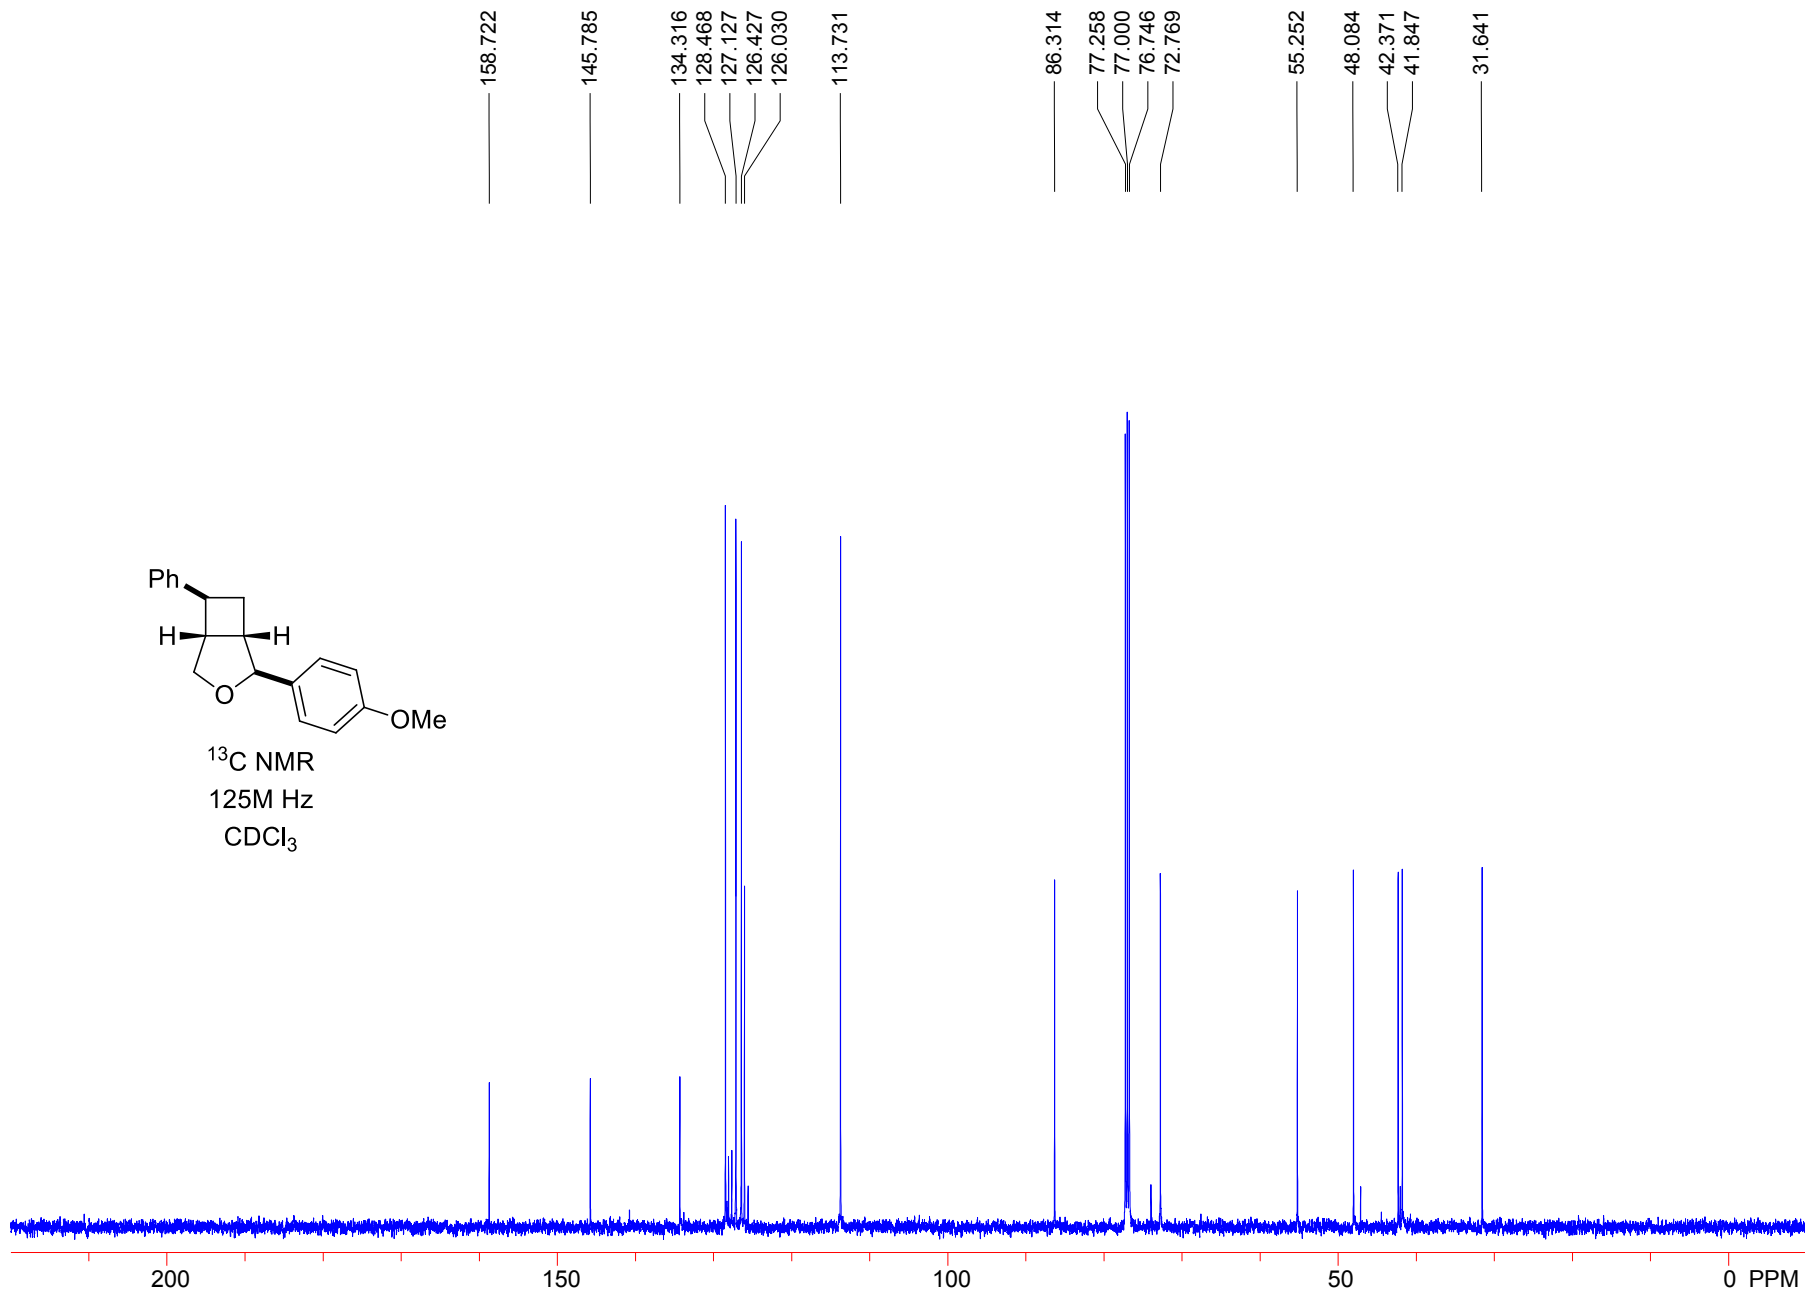

7.297  
7.294  
7.285  
7.282  
7.270  
7.267  
7.238  
7.180  
7.178  
7.165  
7.153  
7.151  
7.150  
7.137  
7.135

3.118  
3.103  
2.745  
2.729  
2.191  
2.173  
2.157  
1.857  
1.848  
1.846  
1.840  
1.835  
1.829  
1.826  
1.820  
1.816  
1.811  
1.523  
1.518  
1.510  
1.504  
1.501  
1.498  
1.474  
1.469  
1.023  
0.714  
0.000

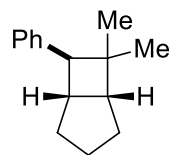

<sup>1</sup>H NMR  
500M Hz  
CDCl<sub>3</sub>

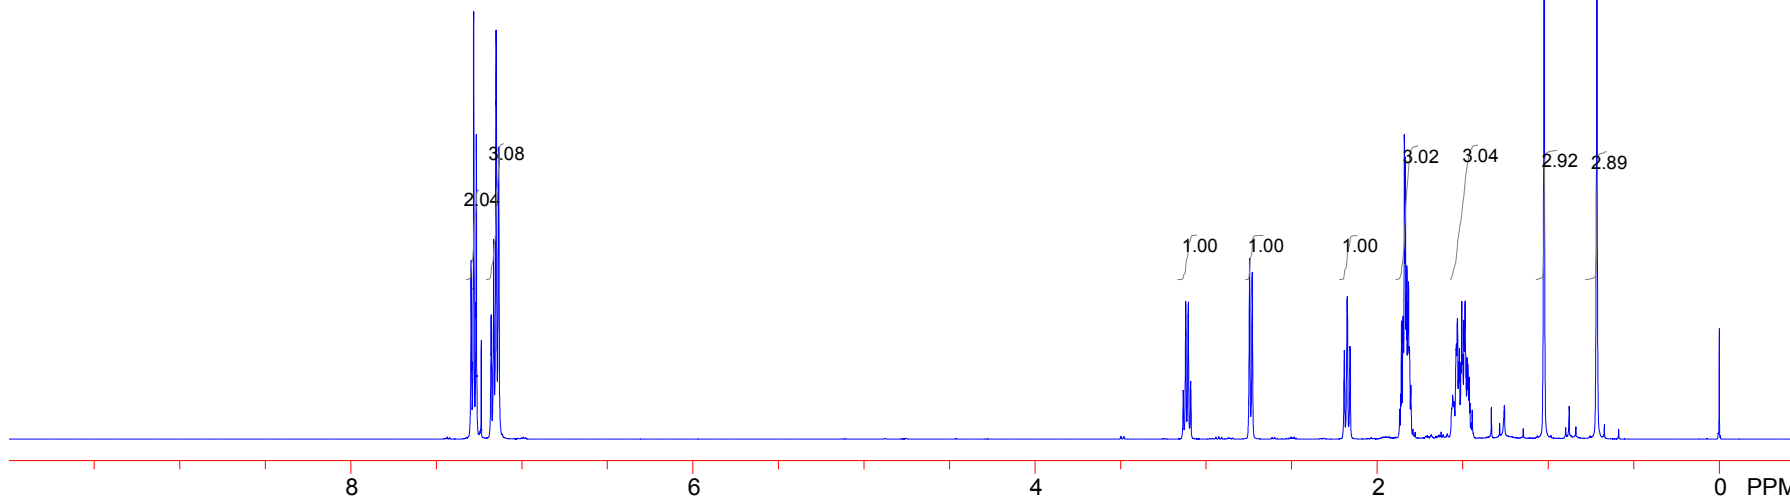

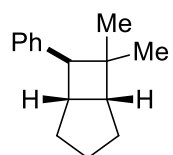

$^{13}\text{C}$  NMR  
125M Hz  
 $\text{CDCl}_3$

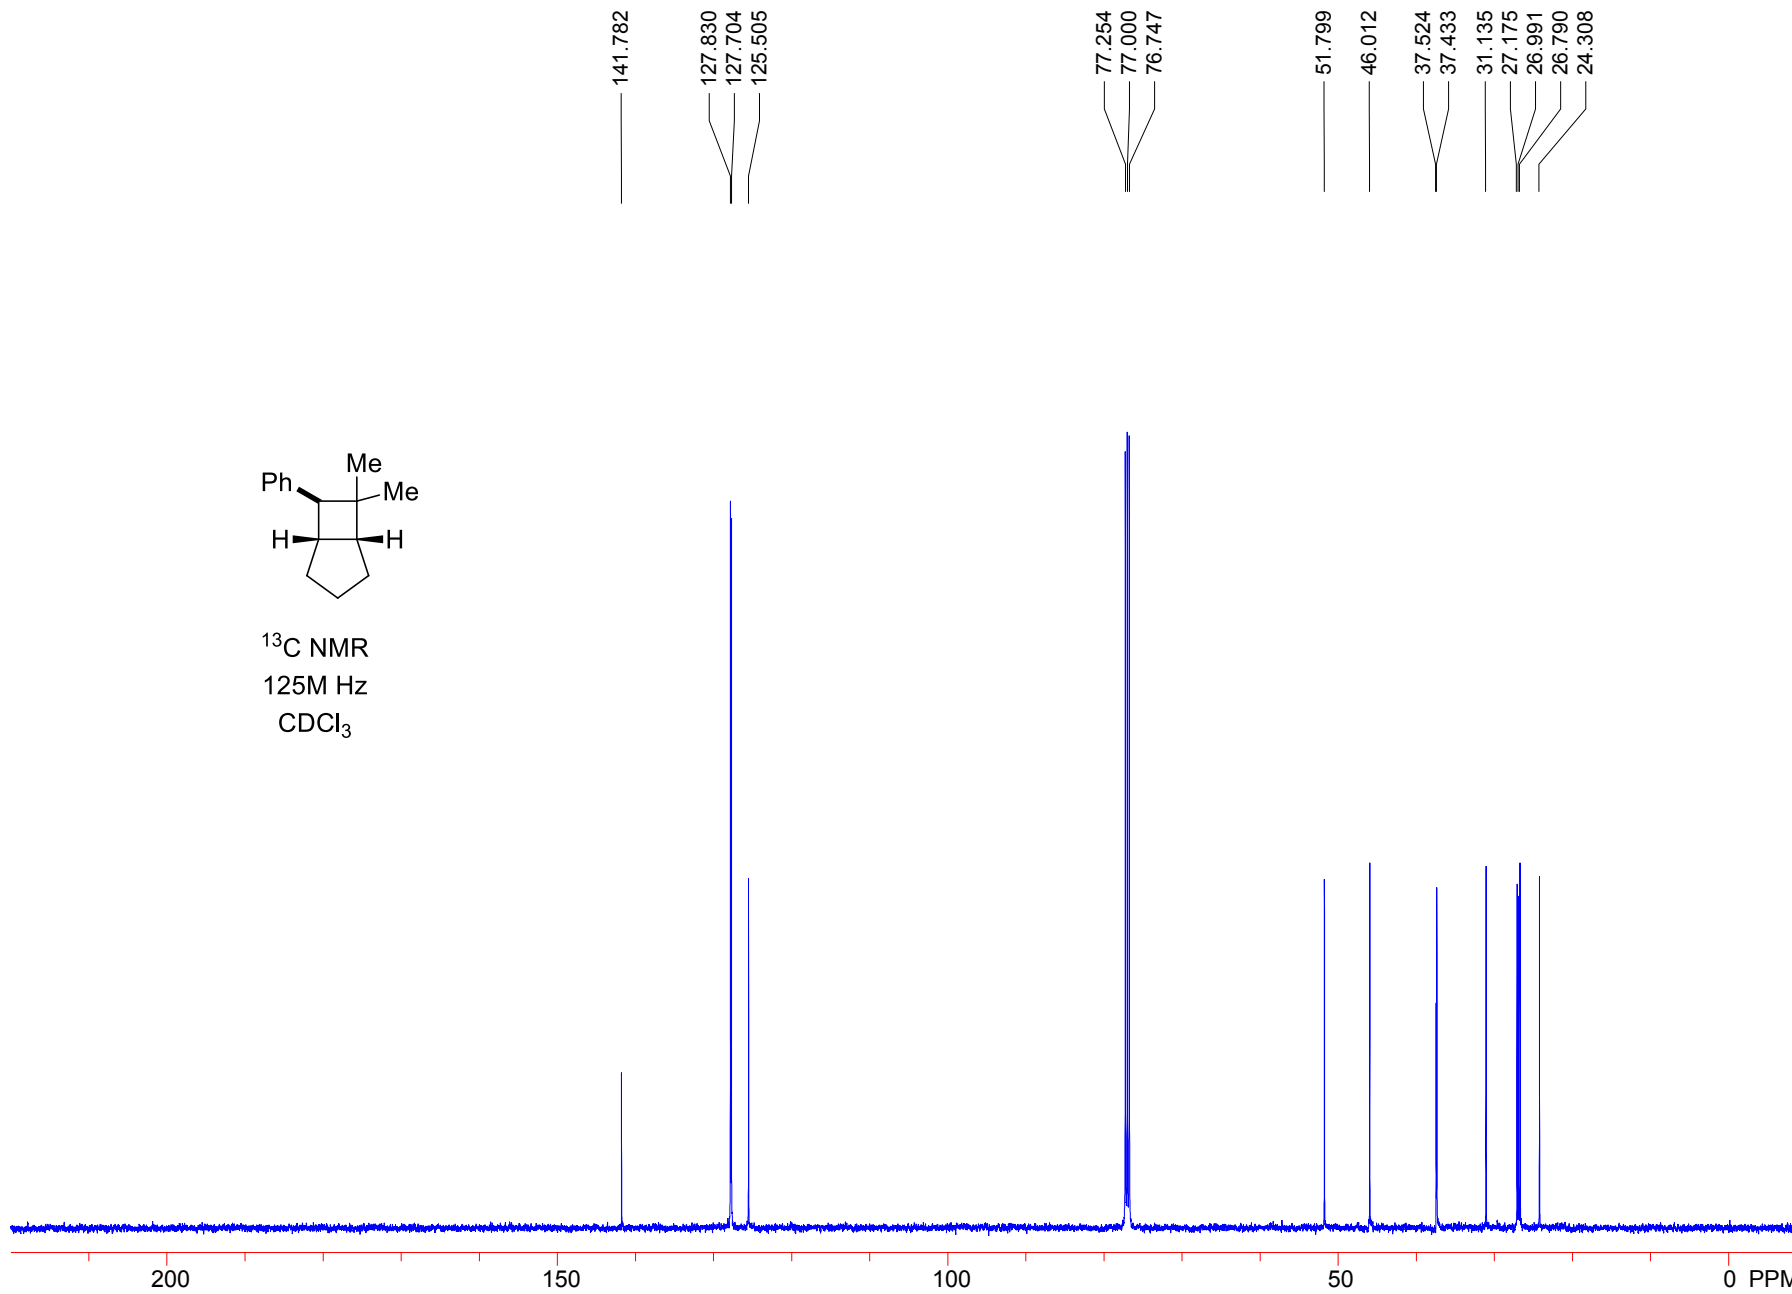



7.736  
7.719  
7.350  
7.333  
7.307  
7.292  
7.276  
7.256  
7.209  
7.194  
7.095  
7.080

3.726  
3.704  
3.427  
3.408  
3.213  
3.199  
3.175  
3.165  
3.160  
3.149  
2.658  
2.642  
2.637  
2.621  
2.610  
2.602  
2.591  
2.442  
2.292  
2.276  
2.260  
1.170  
0.696  
0.000

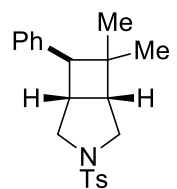

<sup>1</sup>H NMR  
500M Hz  
CDCl<sub>3</sub>

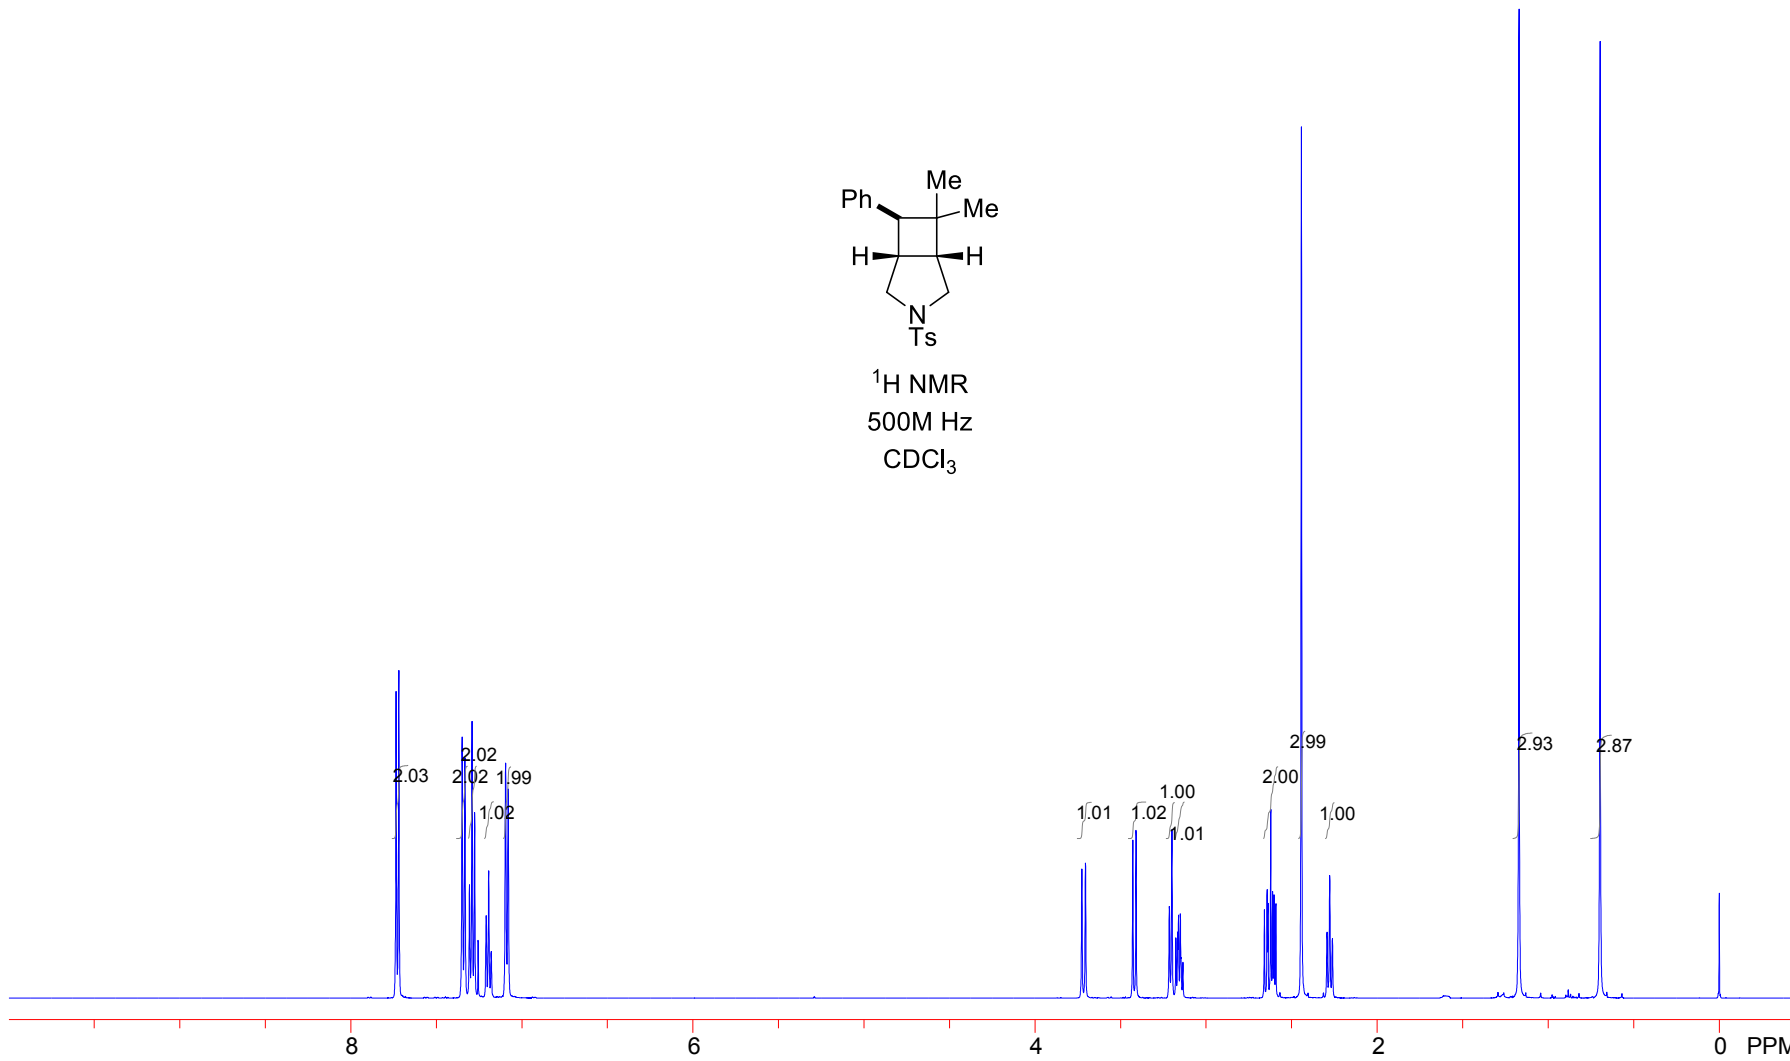

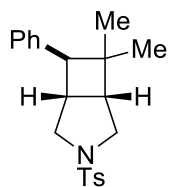

$^{13}\text{C}$  NMR  
125M Hz  
 $\text{CDCl}_3$

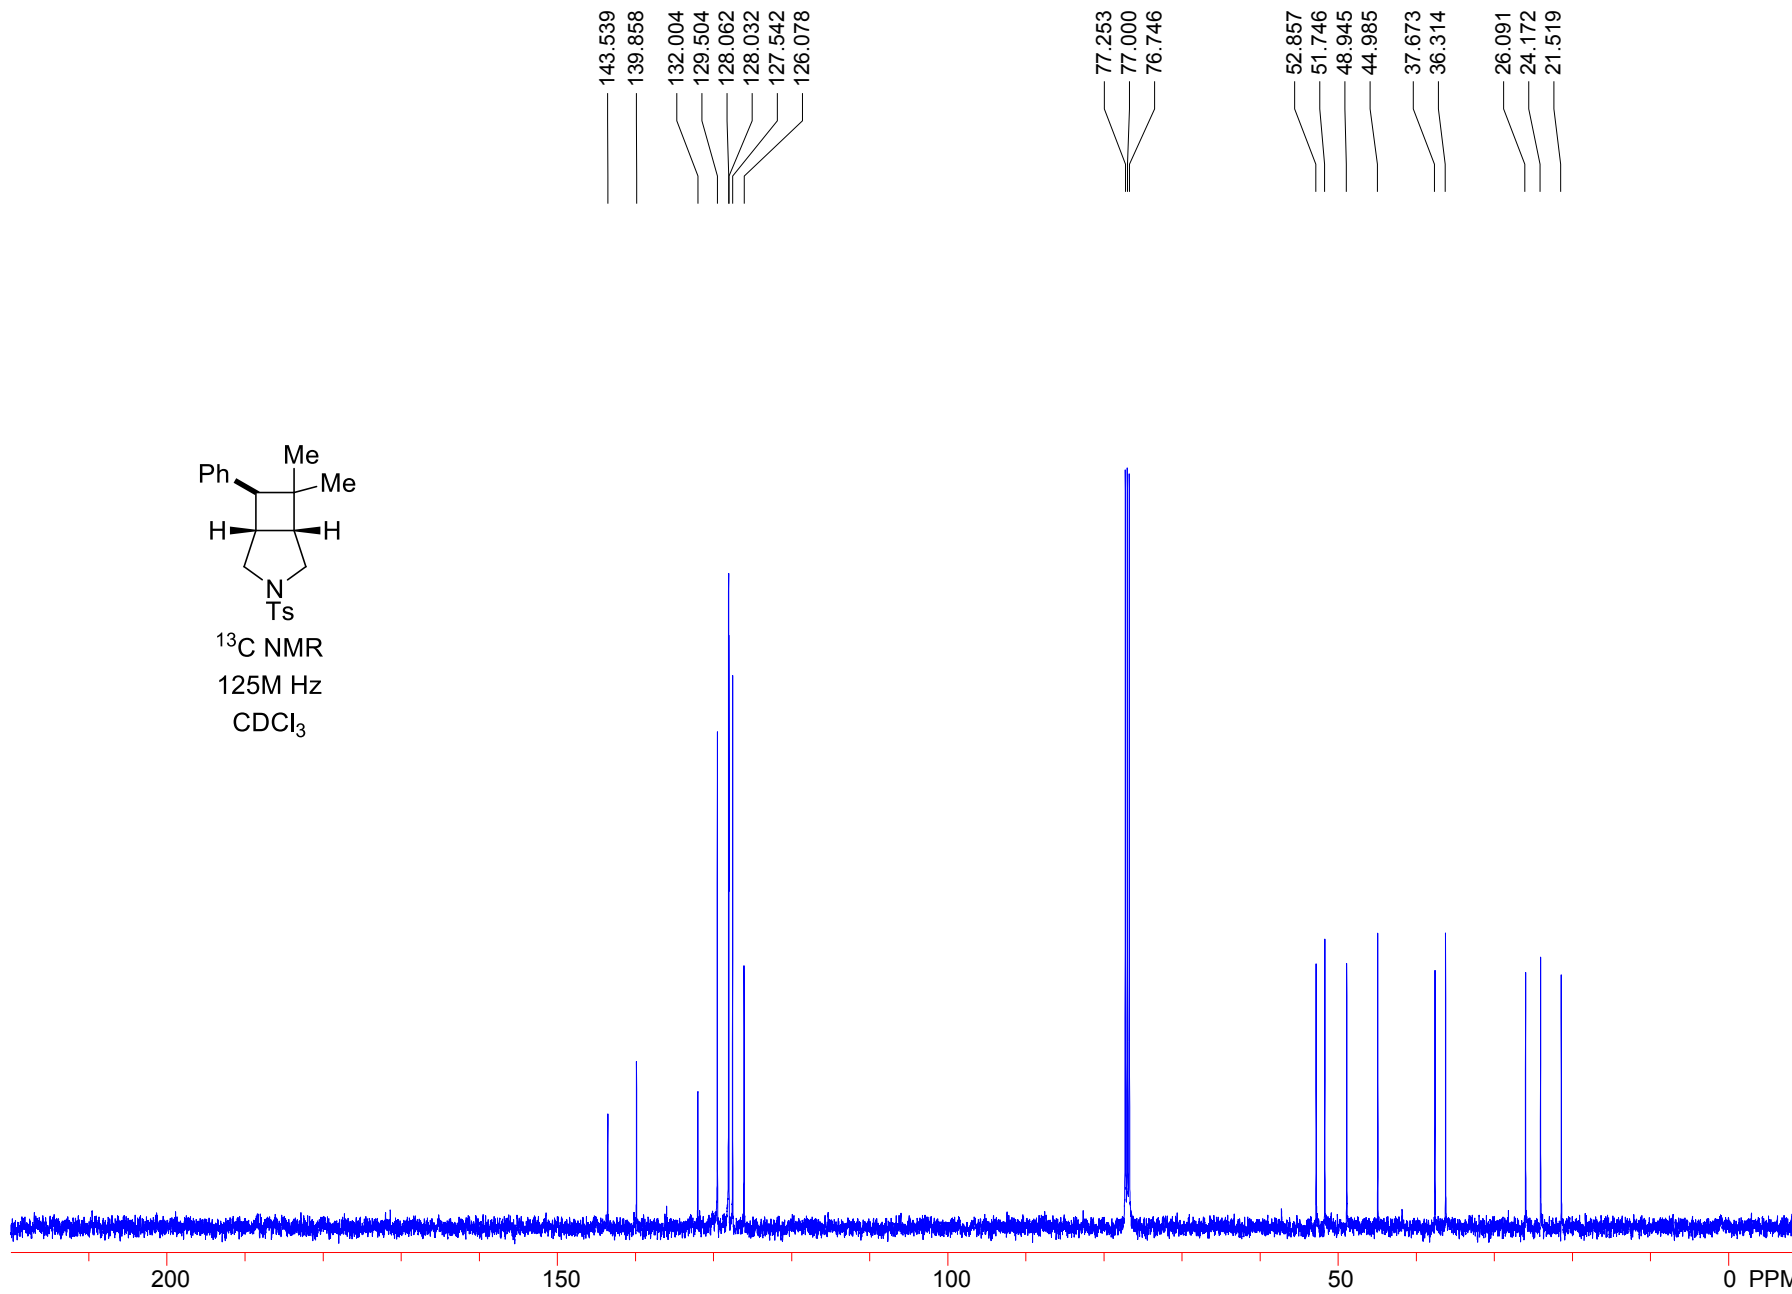

7.289  
7.274  
7.258  
7.243  
7.228  
7.194

3.647  
3.627

2.916  
2.913  
2.901  
2.899

1.970  
1.951  
1.930  
1.545  
1.432  
1.417  
1.299  
1.284  
1.269  
1.019

-0.000

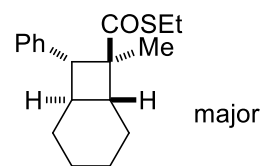

<sup>1</sup>H NMR  
500 MHz  
CDCl<sub>3</sub>

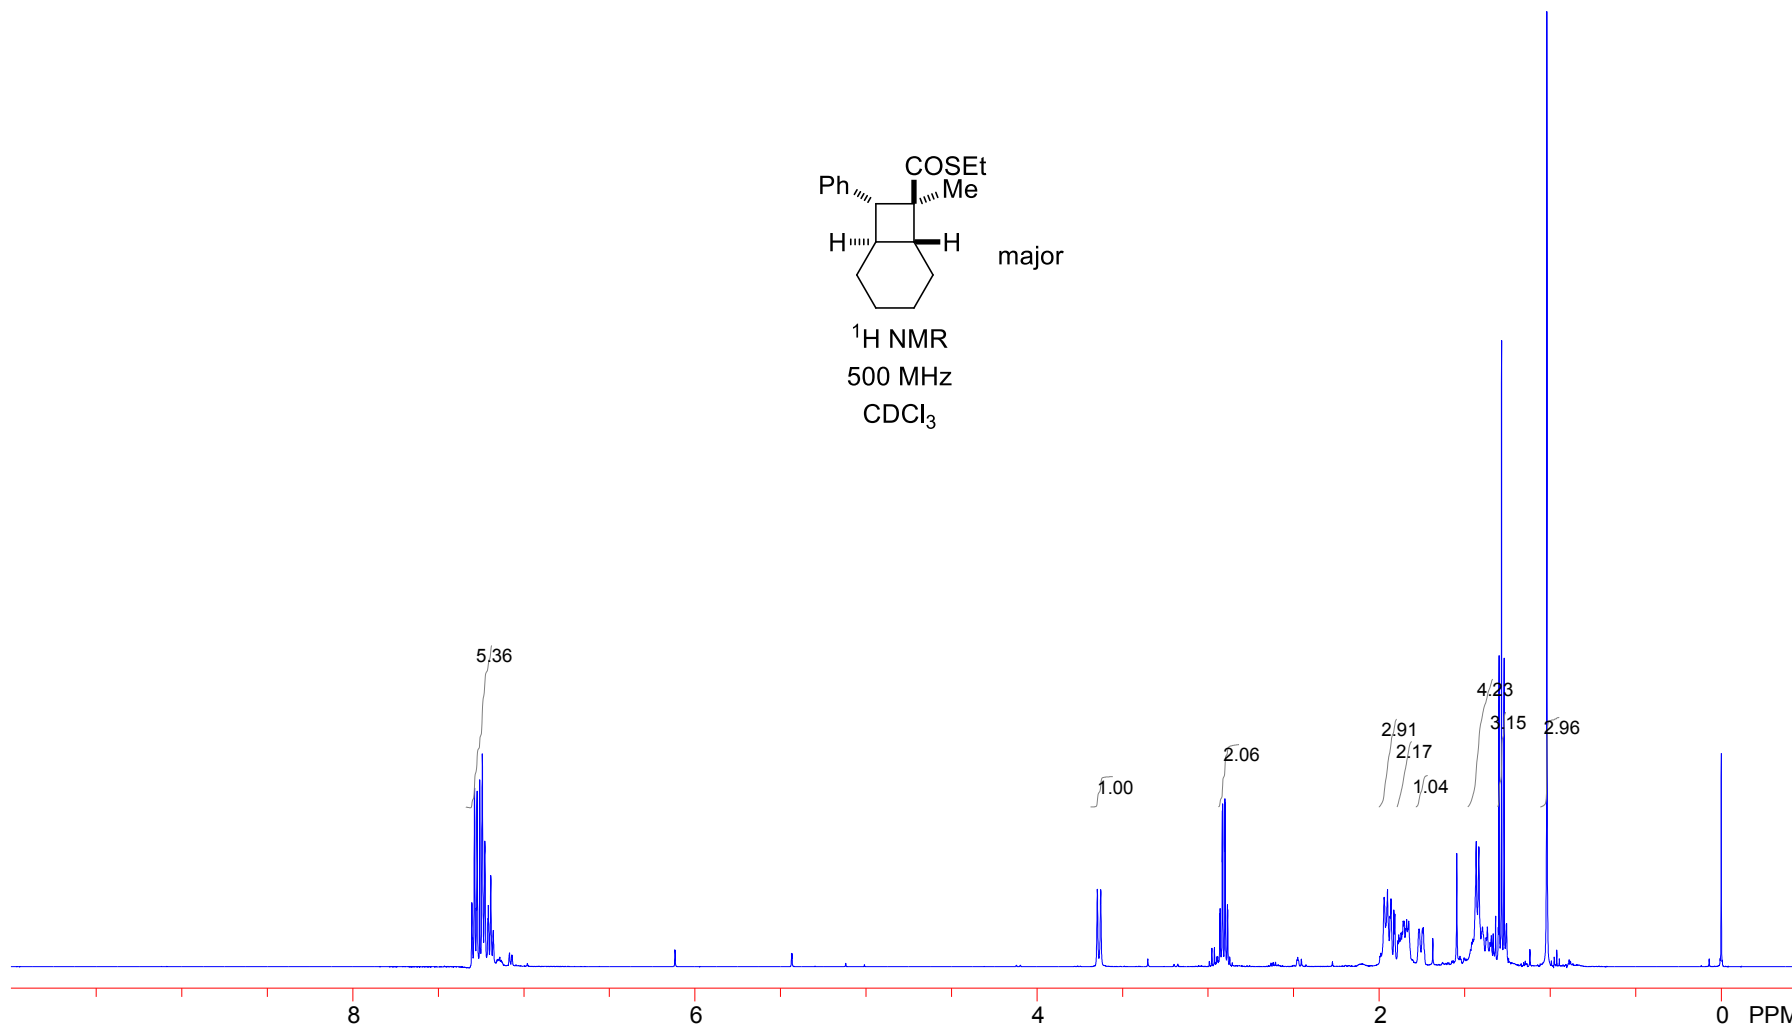

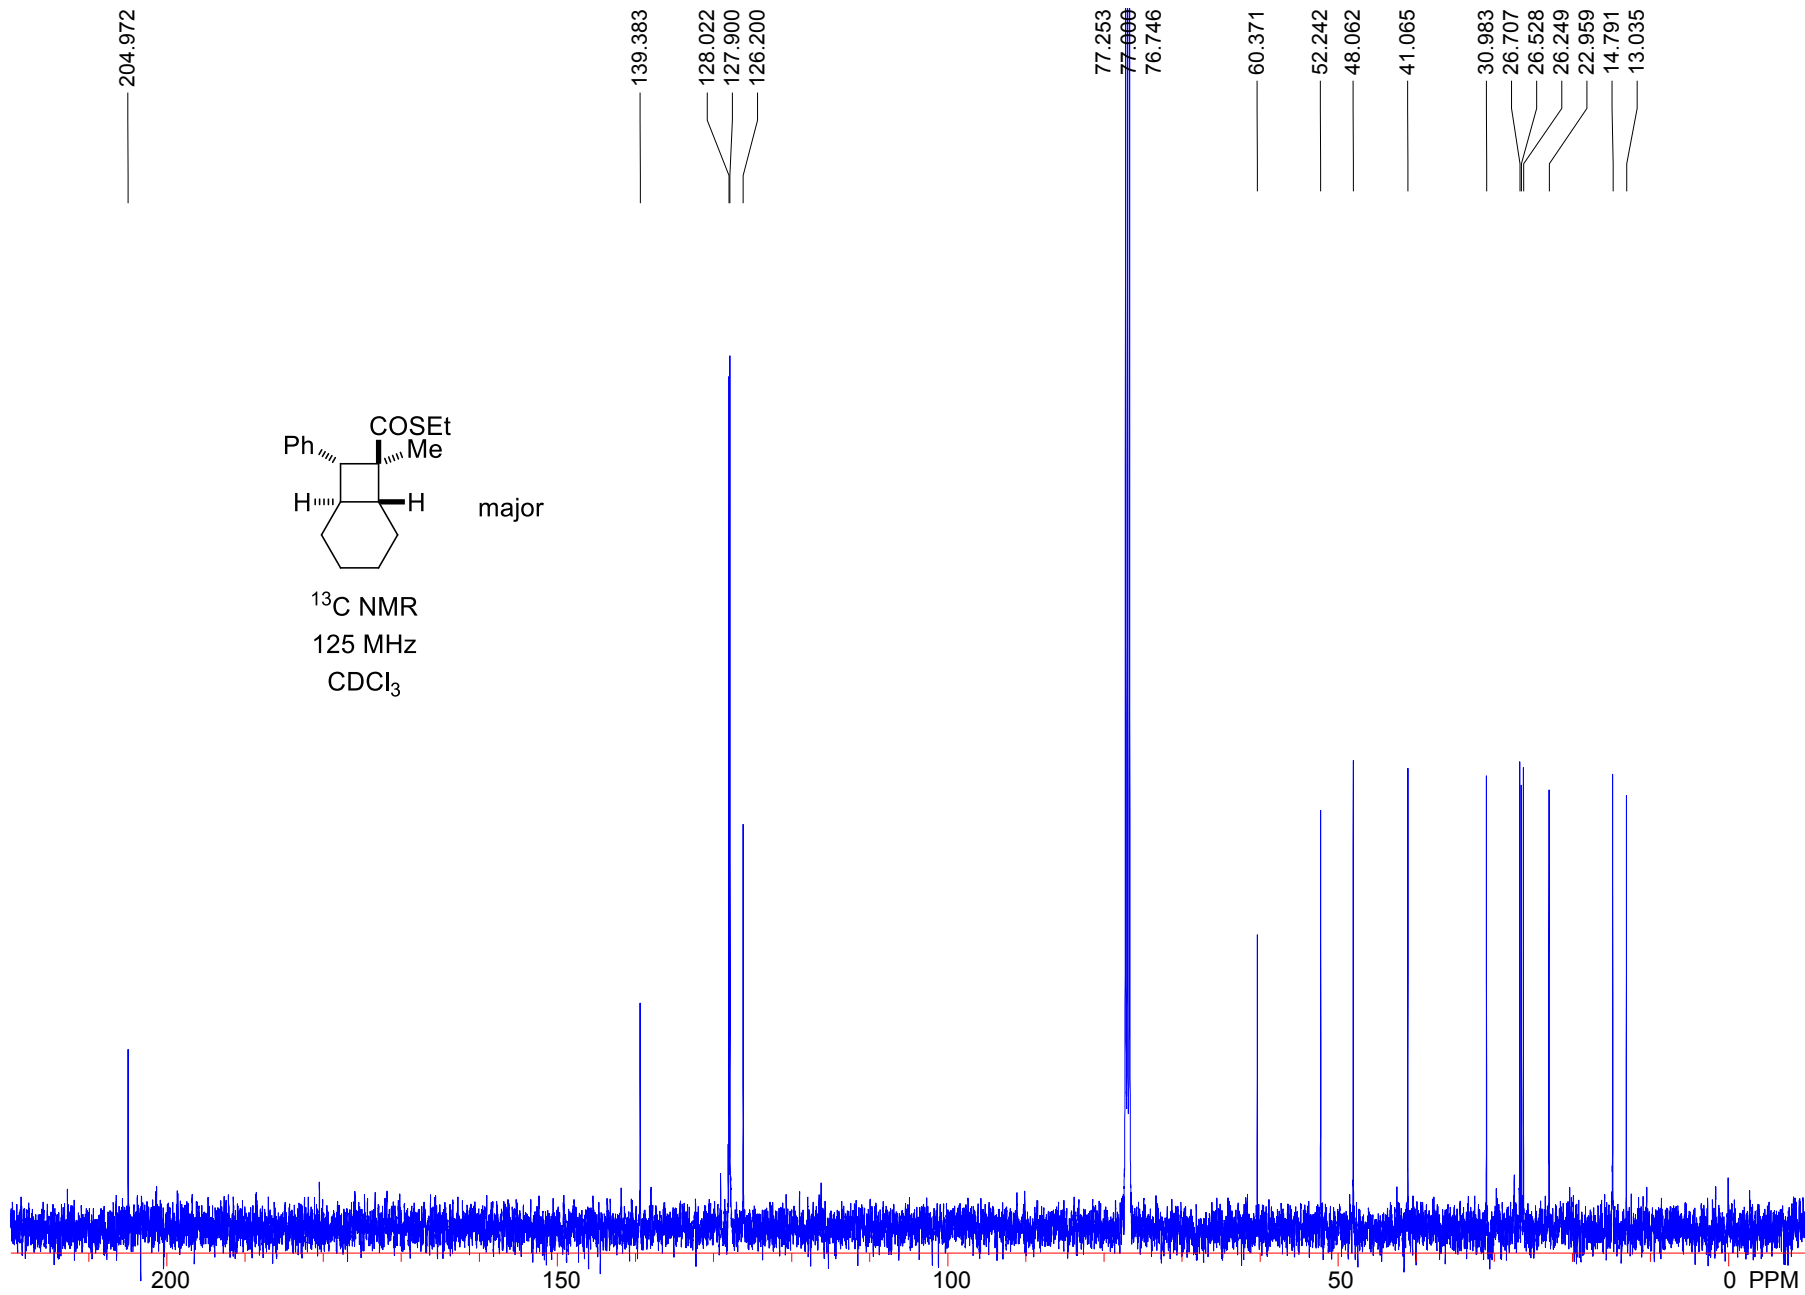

7.271  
7.256  
7.241  
7.185  
7.170  
7.156  
7.129  
7.114

3.420  
3.397  
3.089  
3.086  
3.071  
2.814  
2.798  
2.793  
2.780  
2.776  
2.759  
2.611  
2.596  
2.577  
2.562  
1.769  
1.703  
1.695  
1.687  
1.637  
1.503  
0.939  
0.925  
0.910  
0.000

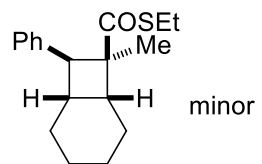

<sup>1</sup>H NMR  
500 MHz  
CDCl<sub>3</sub>

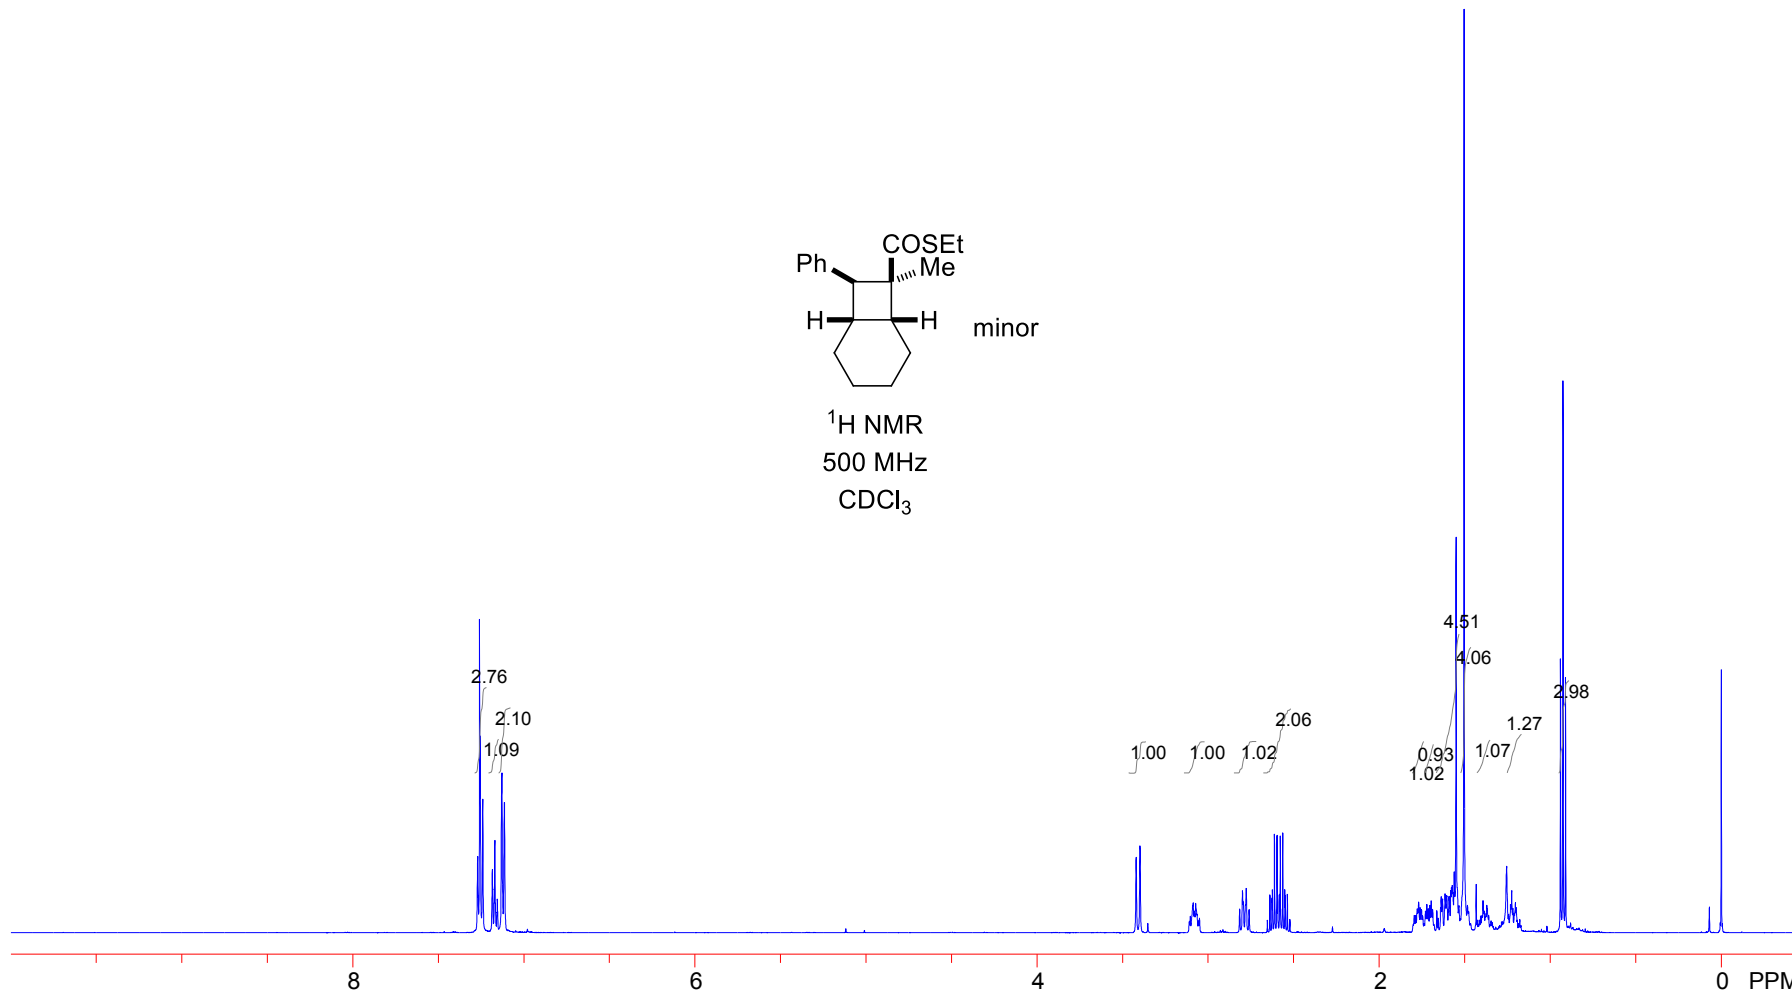

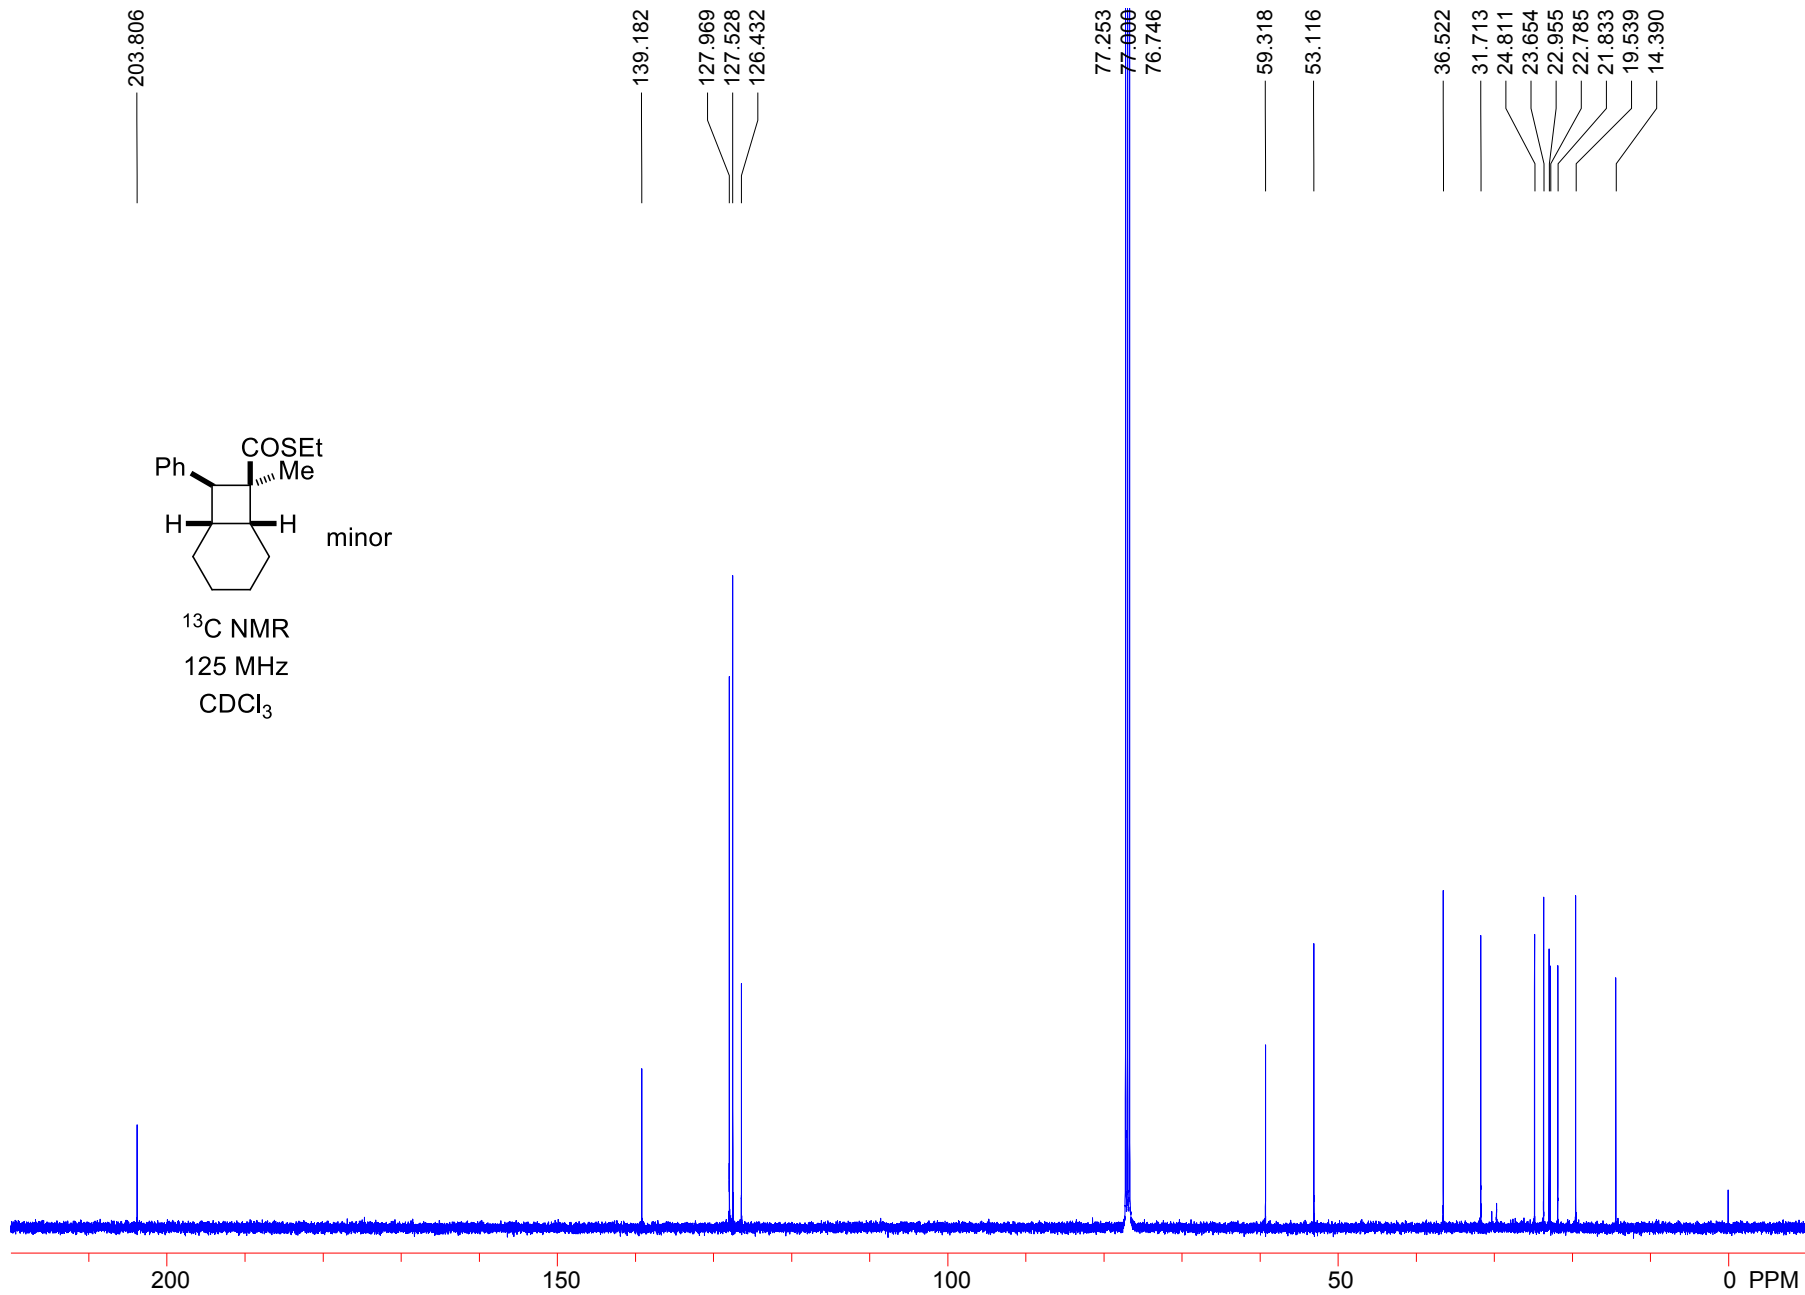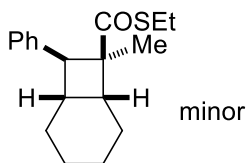

<sup>13</sup>C NMR  
 125 MHz  
 CDCl<sub>3</sub>

7.329  
7.314  
7.298  
7.252  
7.198  
7.183  
7.168  
7.135  
7.118

4.043  
4.025  
3.882  
3.863  
3.674  
3.664  
3.656  
3.646  
3.539  
3.520  
3.461  
3.447  
3.442  
3.428  
2.775  
2.764  
2.752  
2.726  
2.708  
2.690  
1.652  
1.649  
1.639  
1.469  
1.463  
1.354  
1.342  
1.328  
-0.000

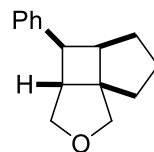

<sup>1</sup>H NMR  
500M Hz  
CDCl<sub>3</sub>

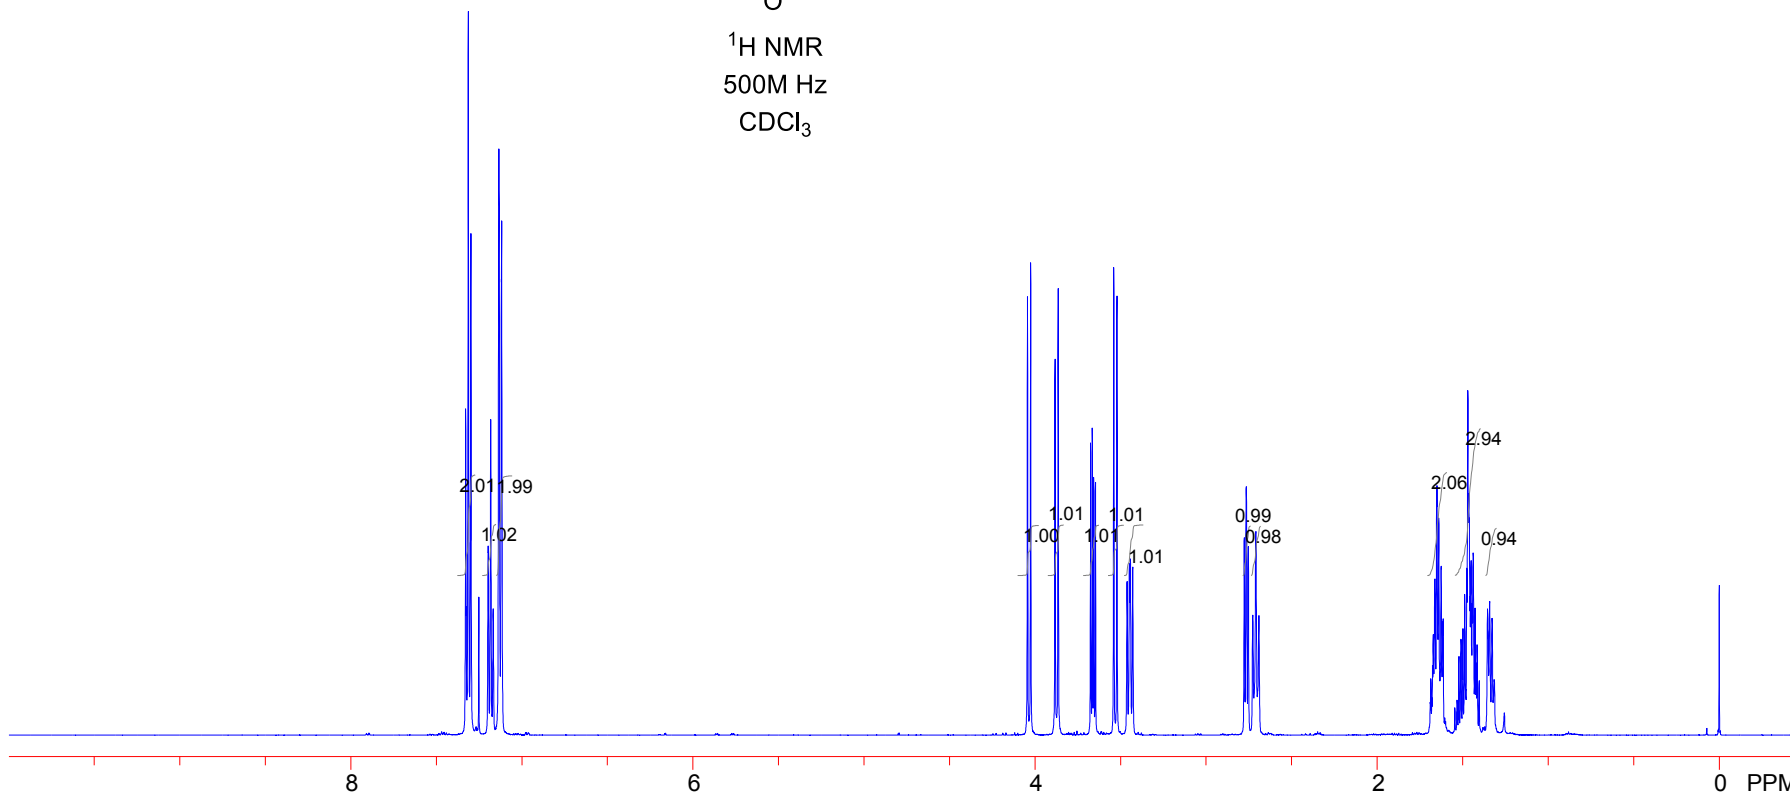

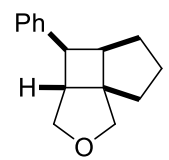

<sup>13</sup>C NMR  
125M Hz  
CDCl<sub>3</sub>

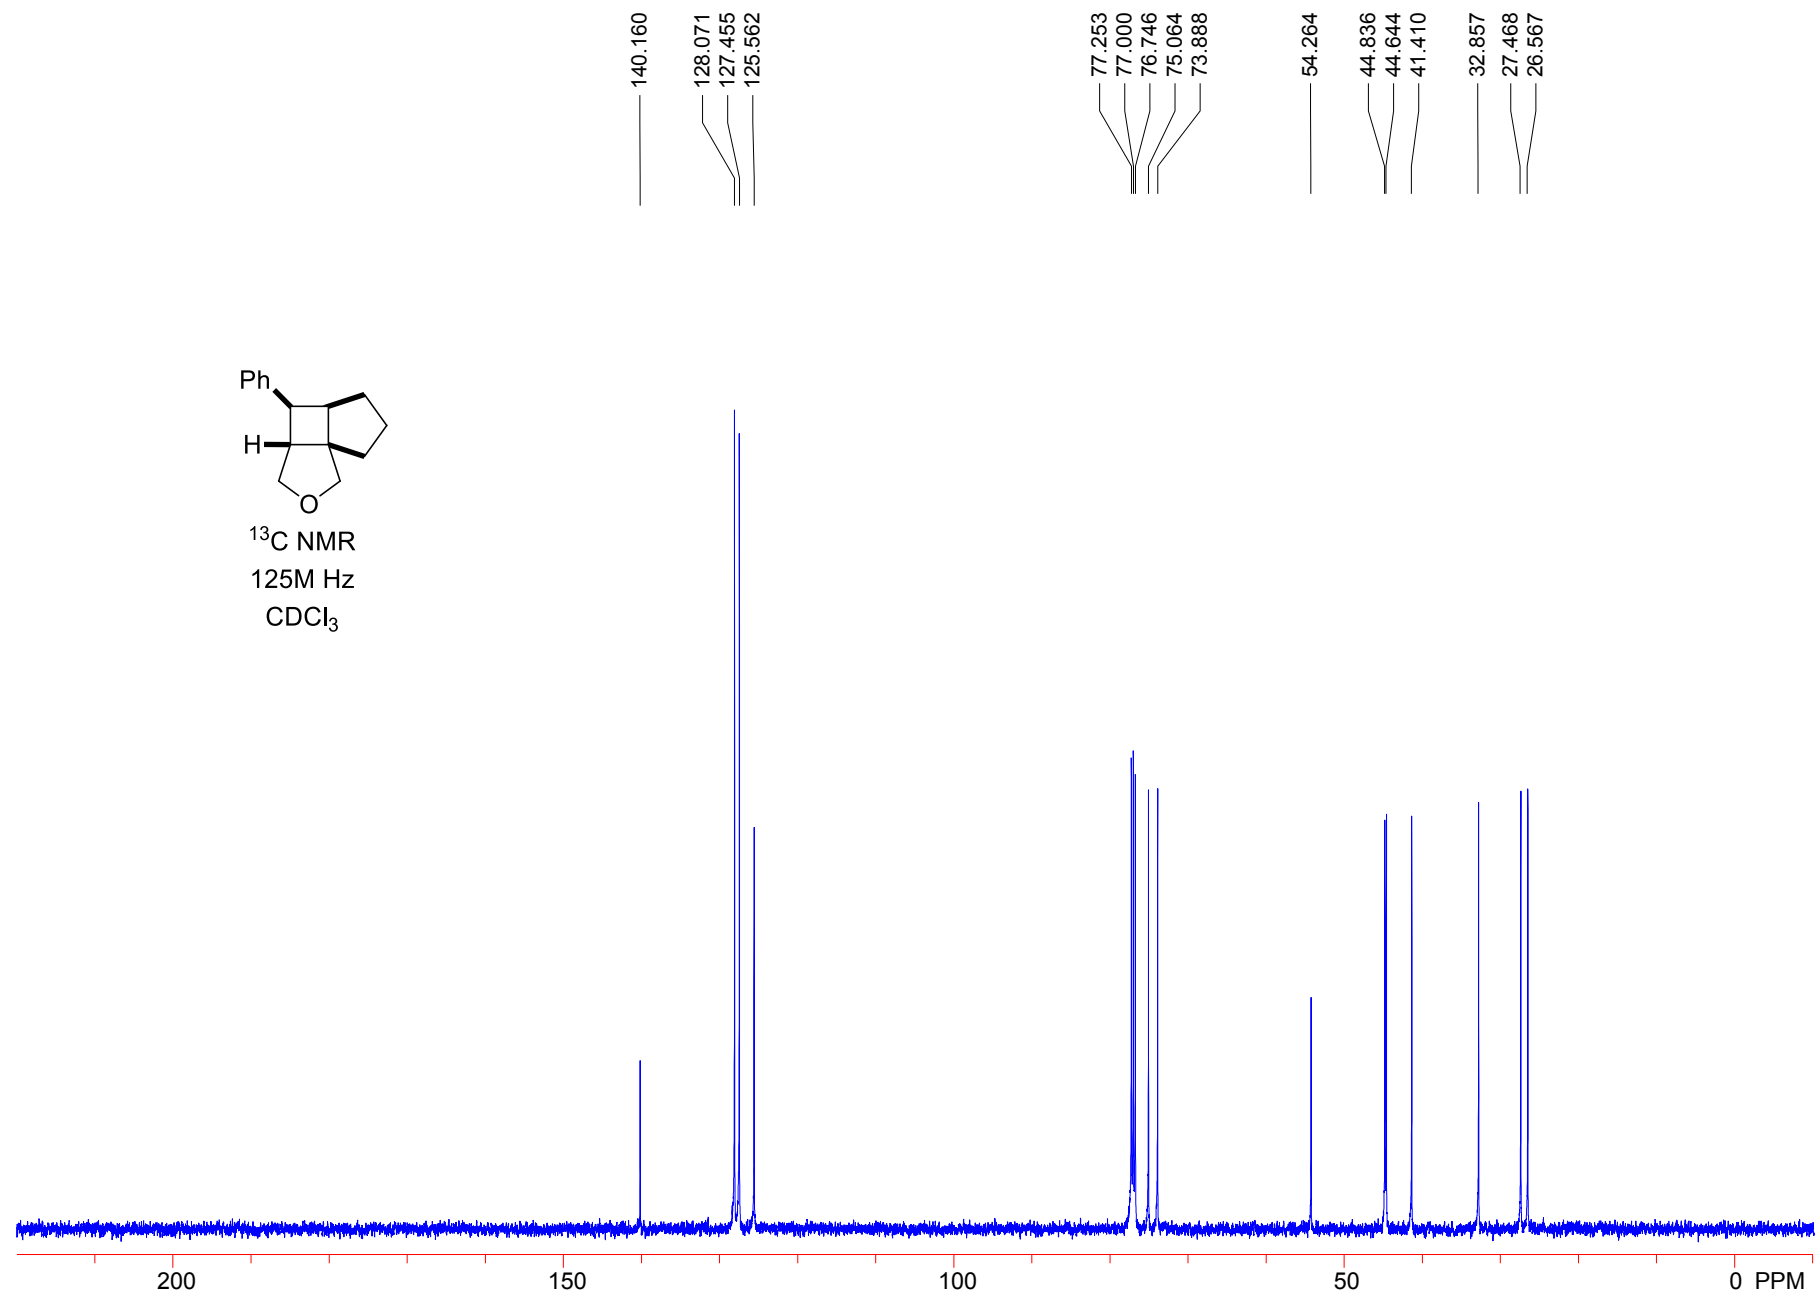



7.318  
7.302  
7.287  
7.227  
7.212  
7.199  
7.184  
7.170

4.034  
4.030  
4.022  
4.016  
4.010  
3.962  
3.944  
3.595  
3.588  
3.577  
3.569  
3.264  
3.248  
3.232  
2.938  
2.930  
2.923  
2.916  
2.909  
2.901  
2.676  
2.660  
2.645  
2.519  
2.512  
2.510  
2.501  
2.111  
2.107  
2.080  
1.994  
1.968  
1.602  
1.580  
1.572  
1.519  
1.496  
1.430  
1.423  
1.416  
0.000

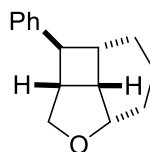

<sup>1</sup>H NMR  
500M Hz  
CDCl<sub>3</sub>

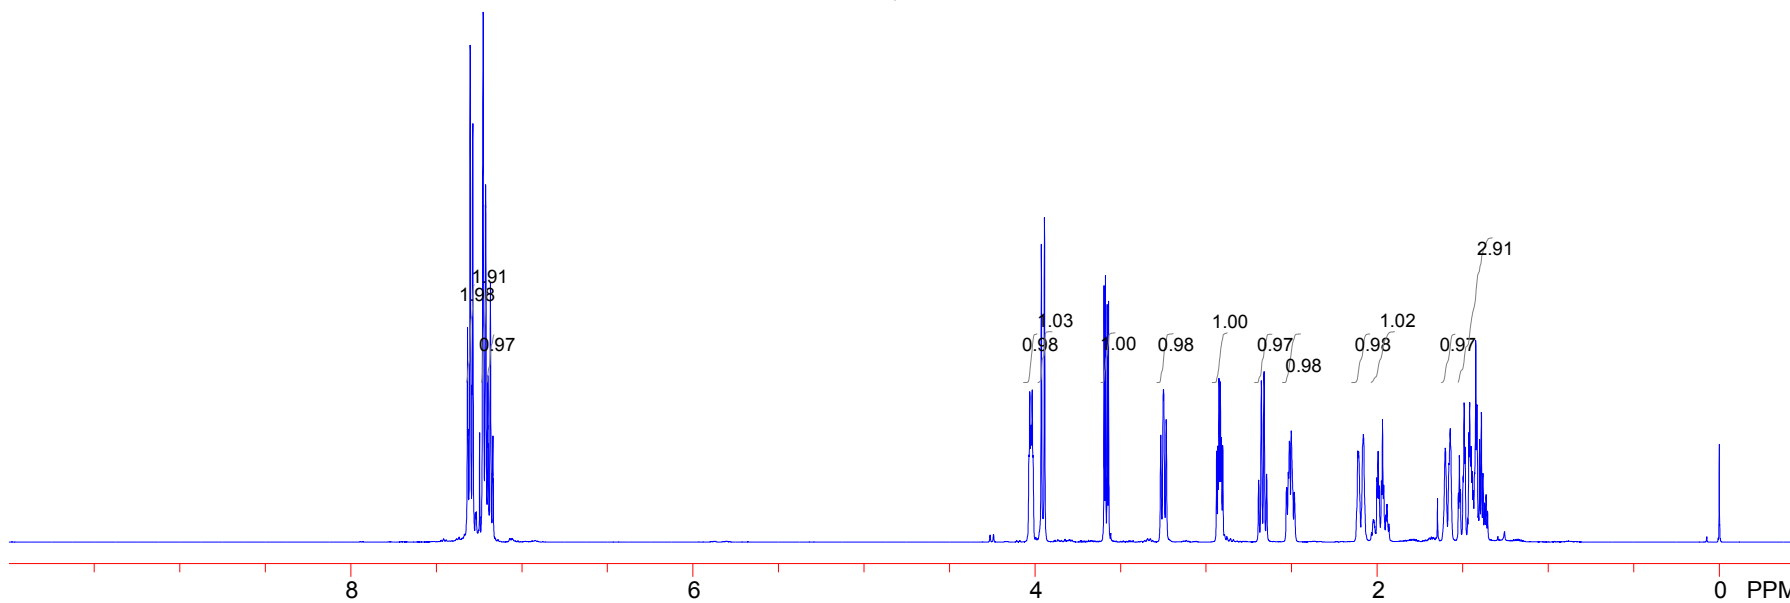

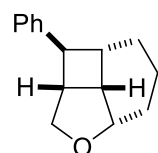

$^{13}\text{C}$  NMR  
125M Hz  
 $\text{CDCl}_3$

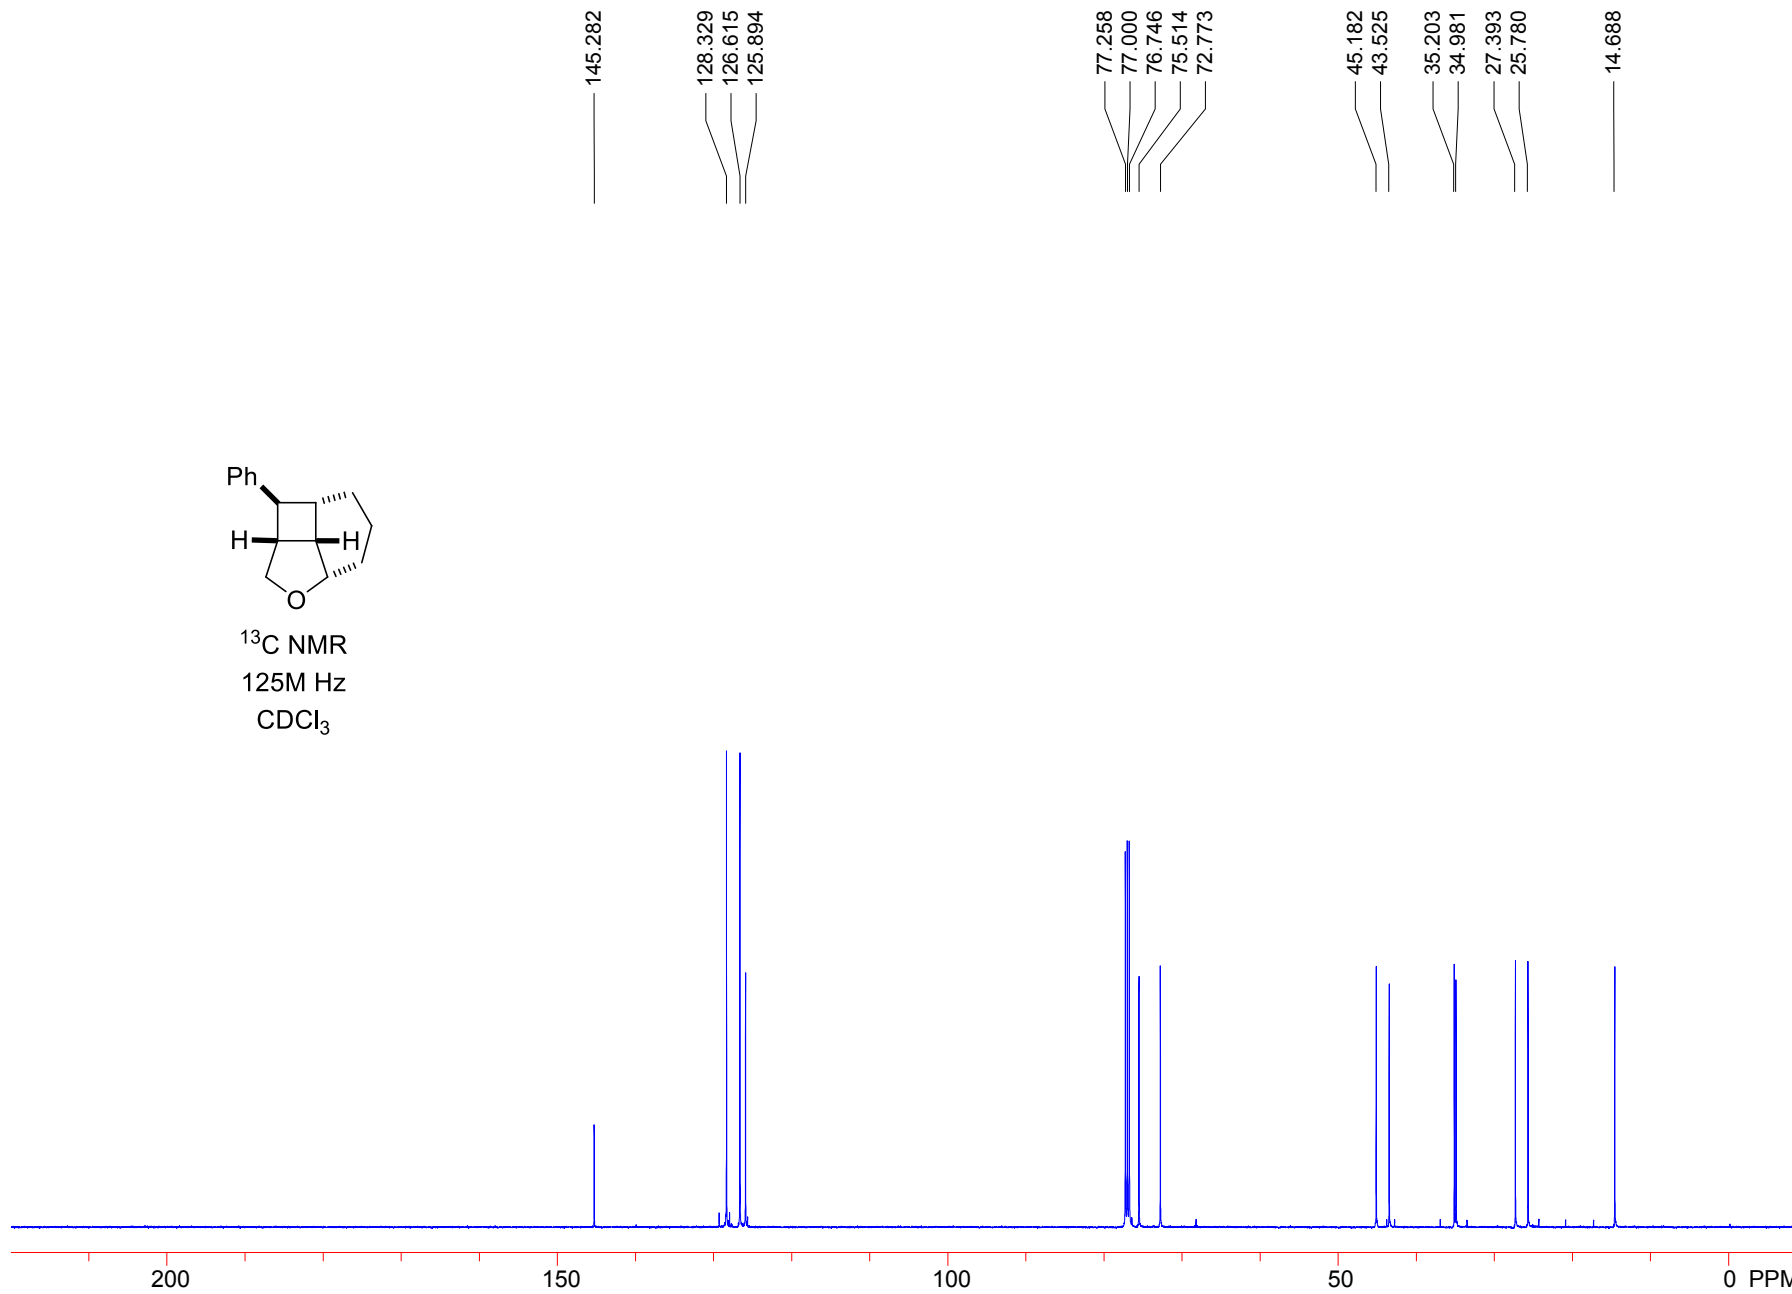

7.451  
7.446  
7.443  
7.439  
7.433  
7.295  
7.290  
7.288  
7.285  
7.278  
7.153  
7.147  
7.144  
7.141  
7.139  
7.136

3.749  
3.745  
3.099  
3.085  
3.081  
3.067  
2.858  
2.854  
2.785  
2.767  
2.761  
2.749  
2.743  
2.725  
2.161  
2.158  
2.151  
2.146  
2.135  
2.095  
2.038  
2.011  
1.367  
1.361  
1.355  
1.343  
1.337  
1.331  
1.104  
1.090  
1.080

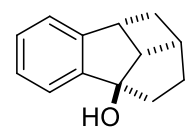

<sup>1</sup>H NMR  
500 MHz  
CDCl<sub>3</sub>

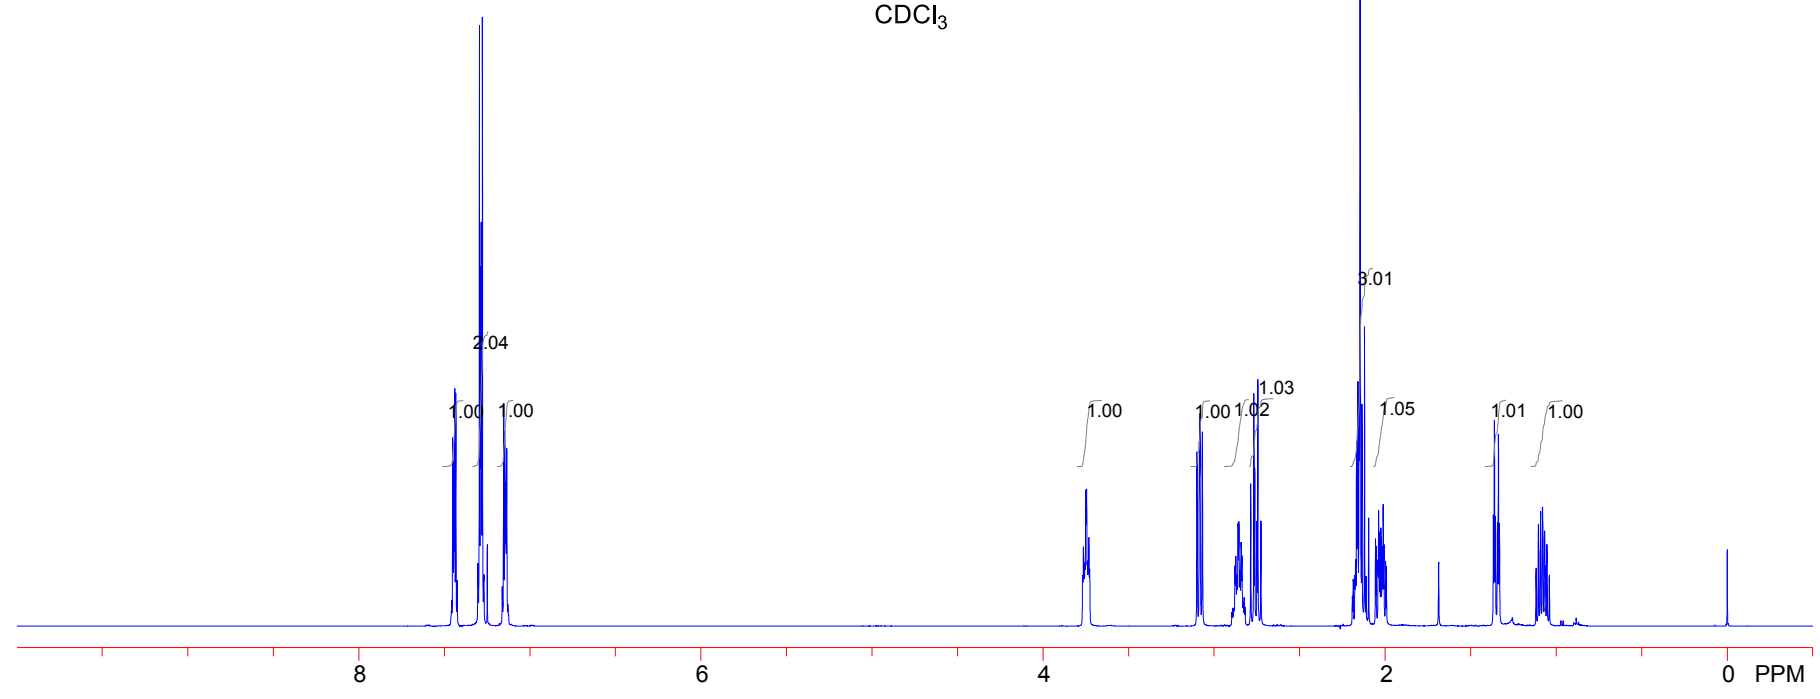

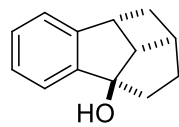

$^{13}\text{C}$  NMR  
125 MHz  
 $\text{CDCl}_3$

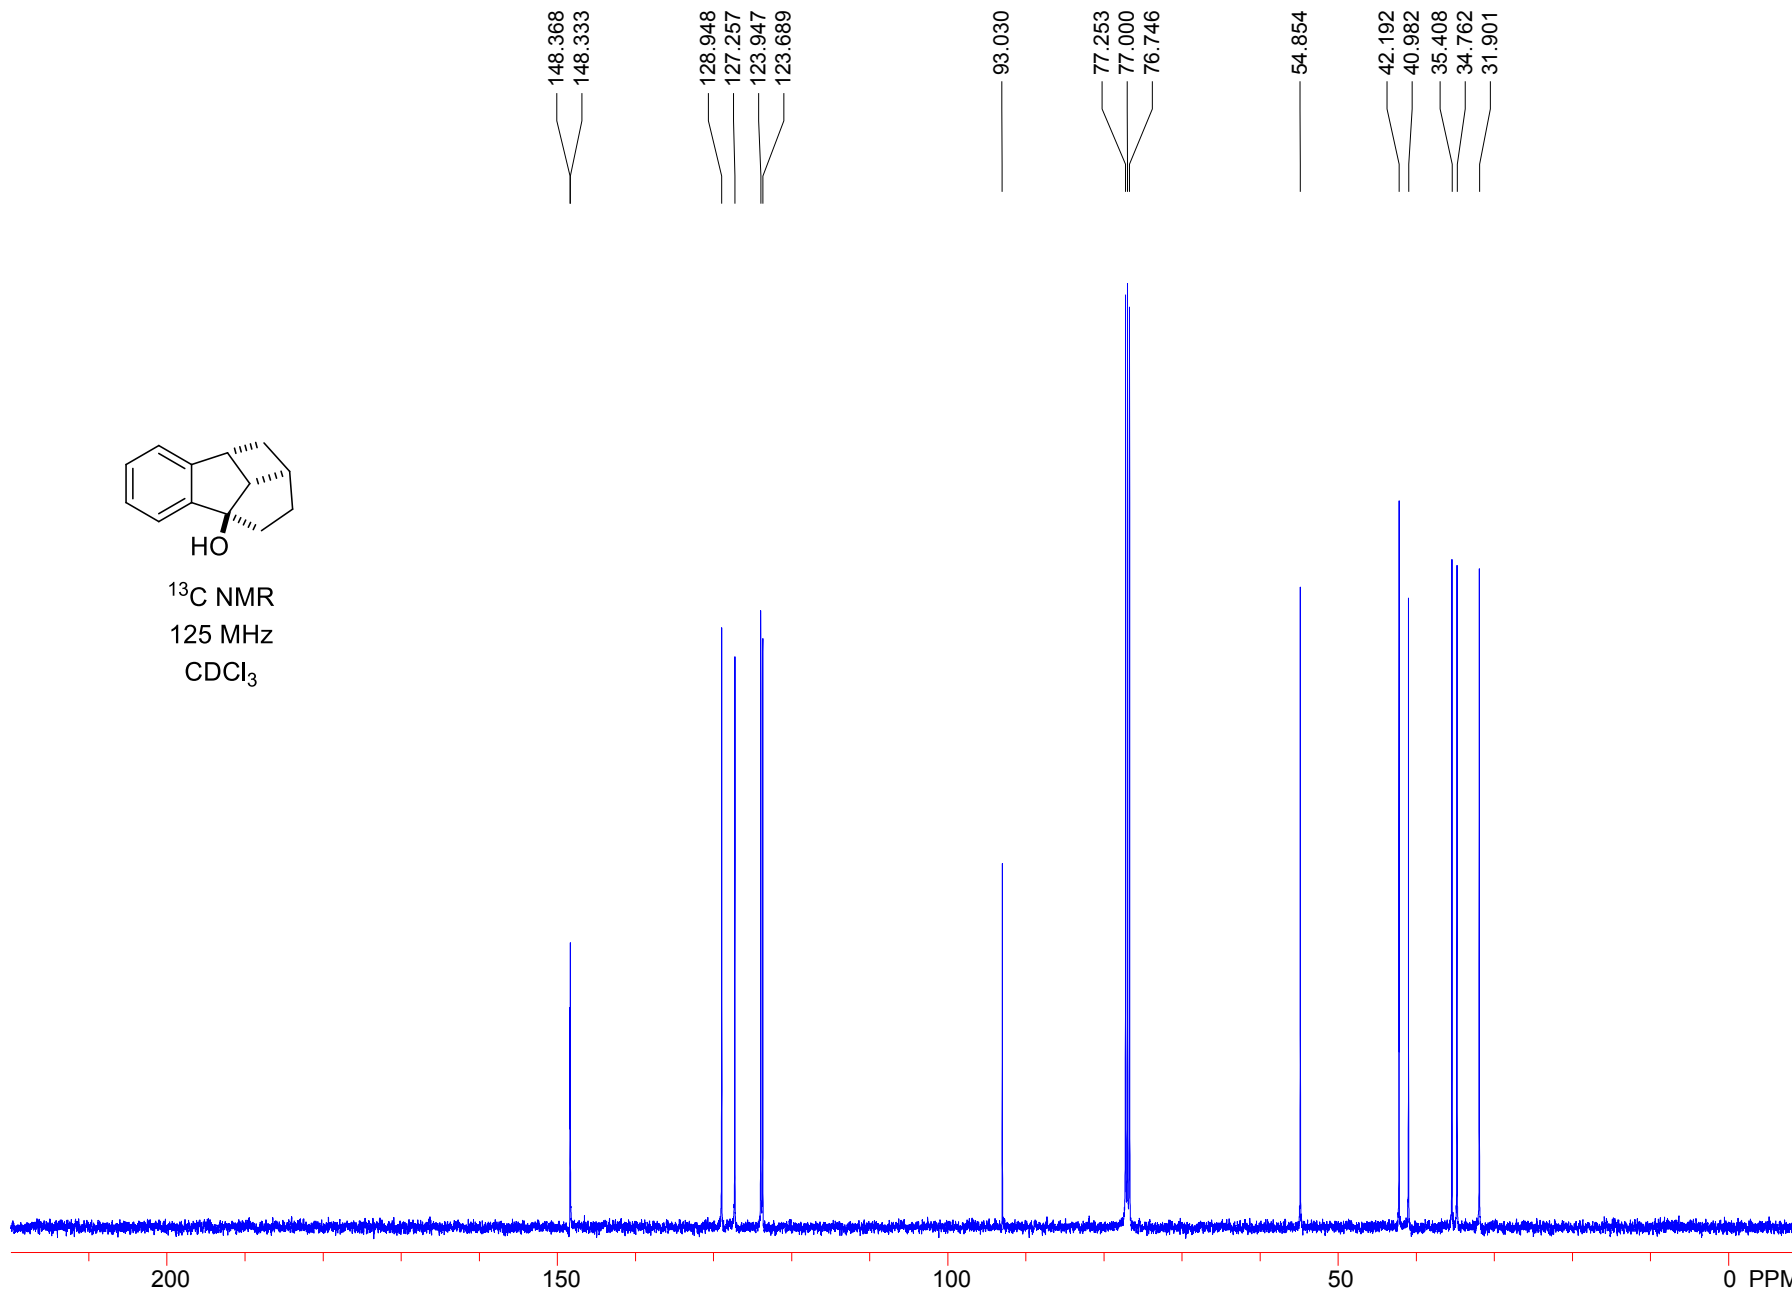

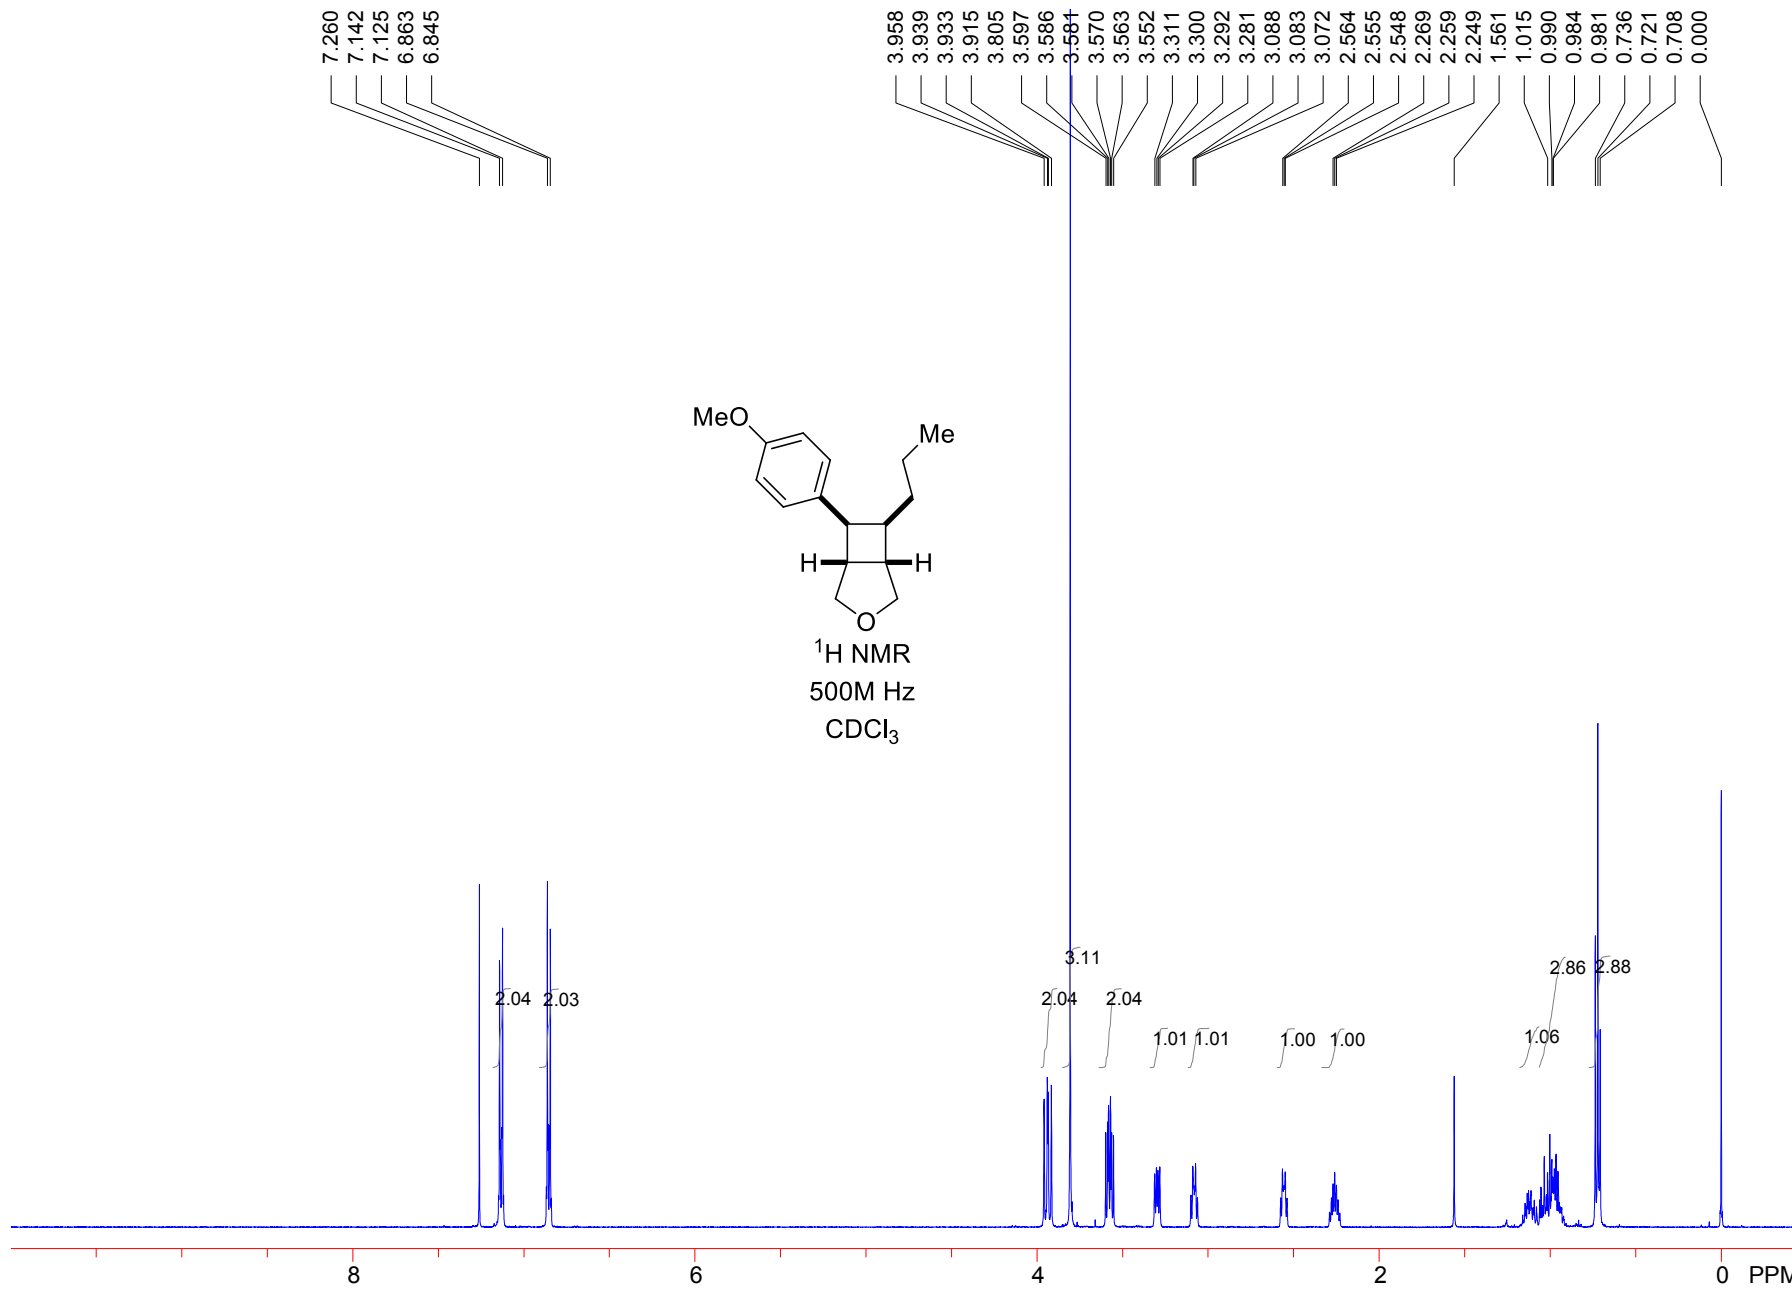

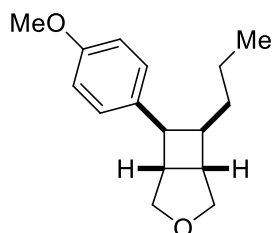

<sup>13</sup>C NMR  
125M Hz  
CDCl<sub>3</sub>

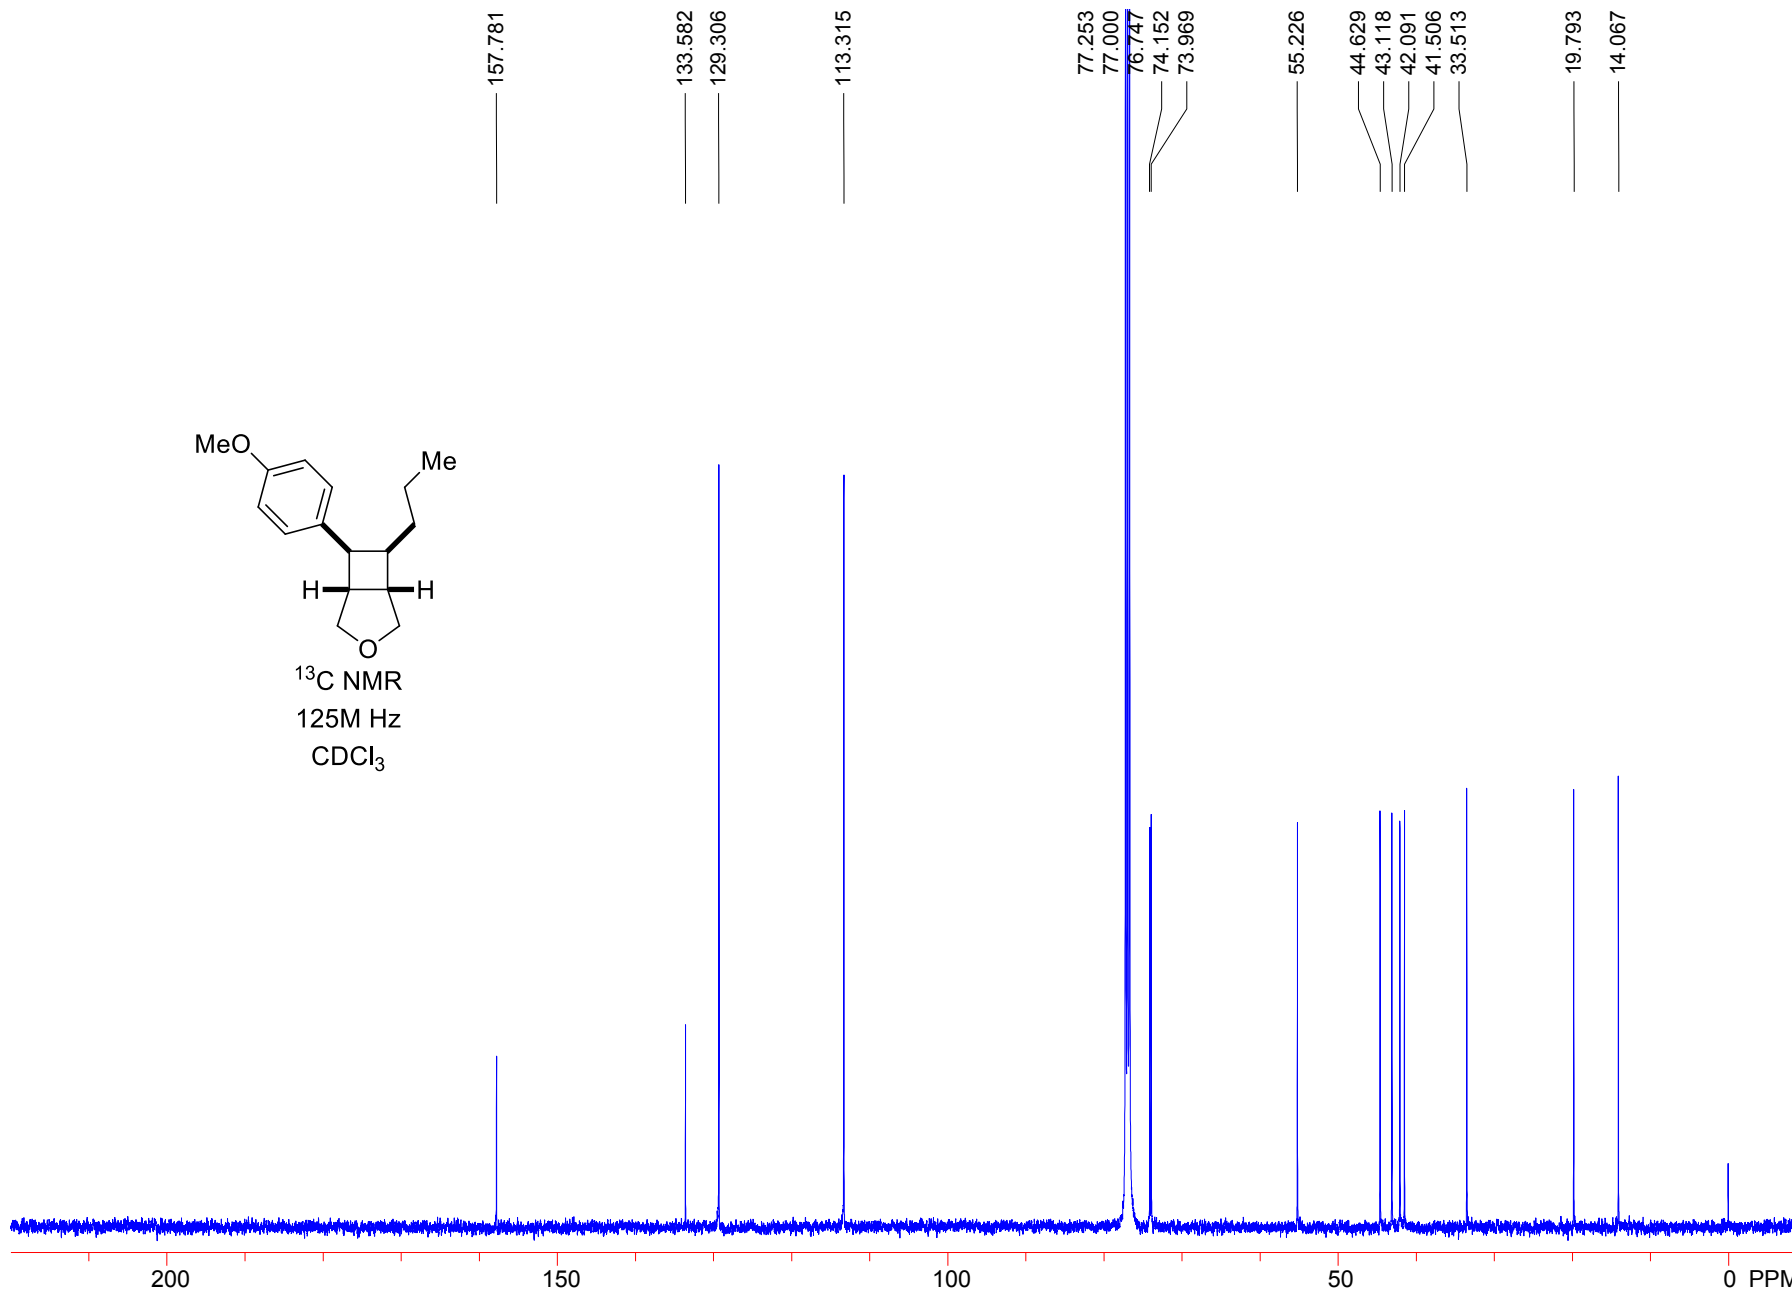

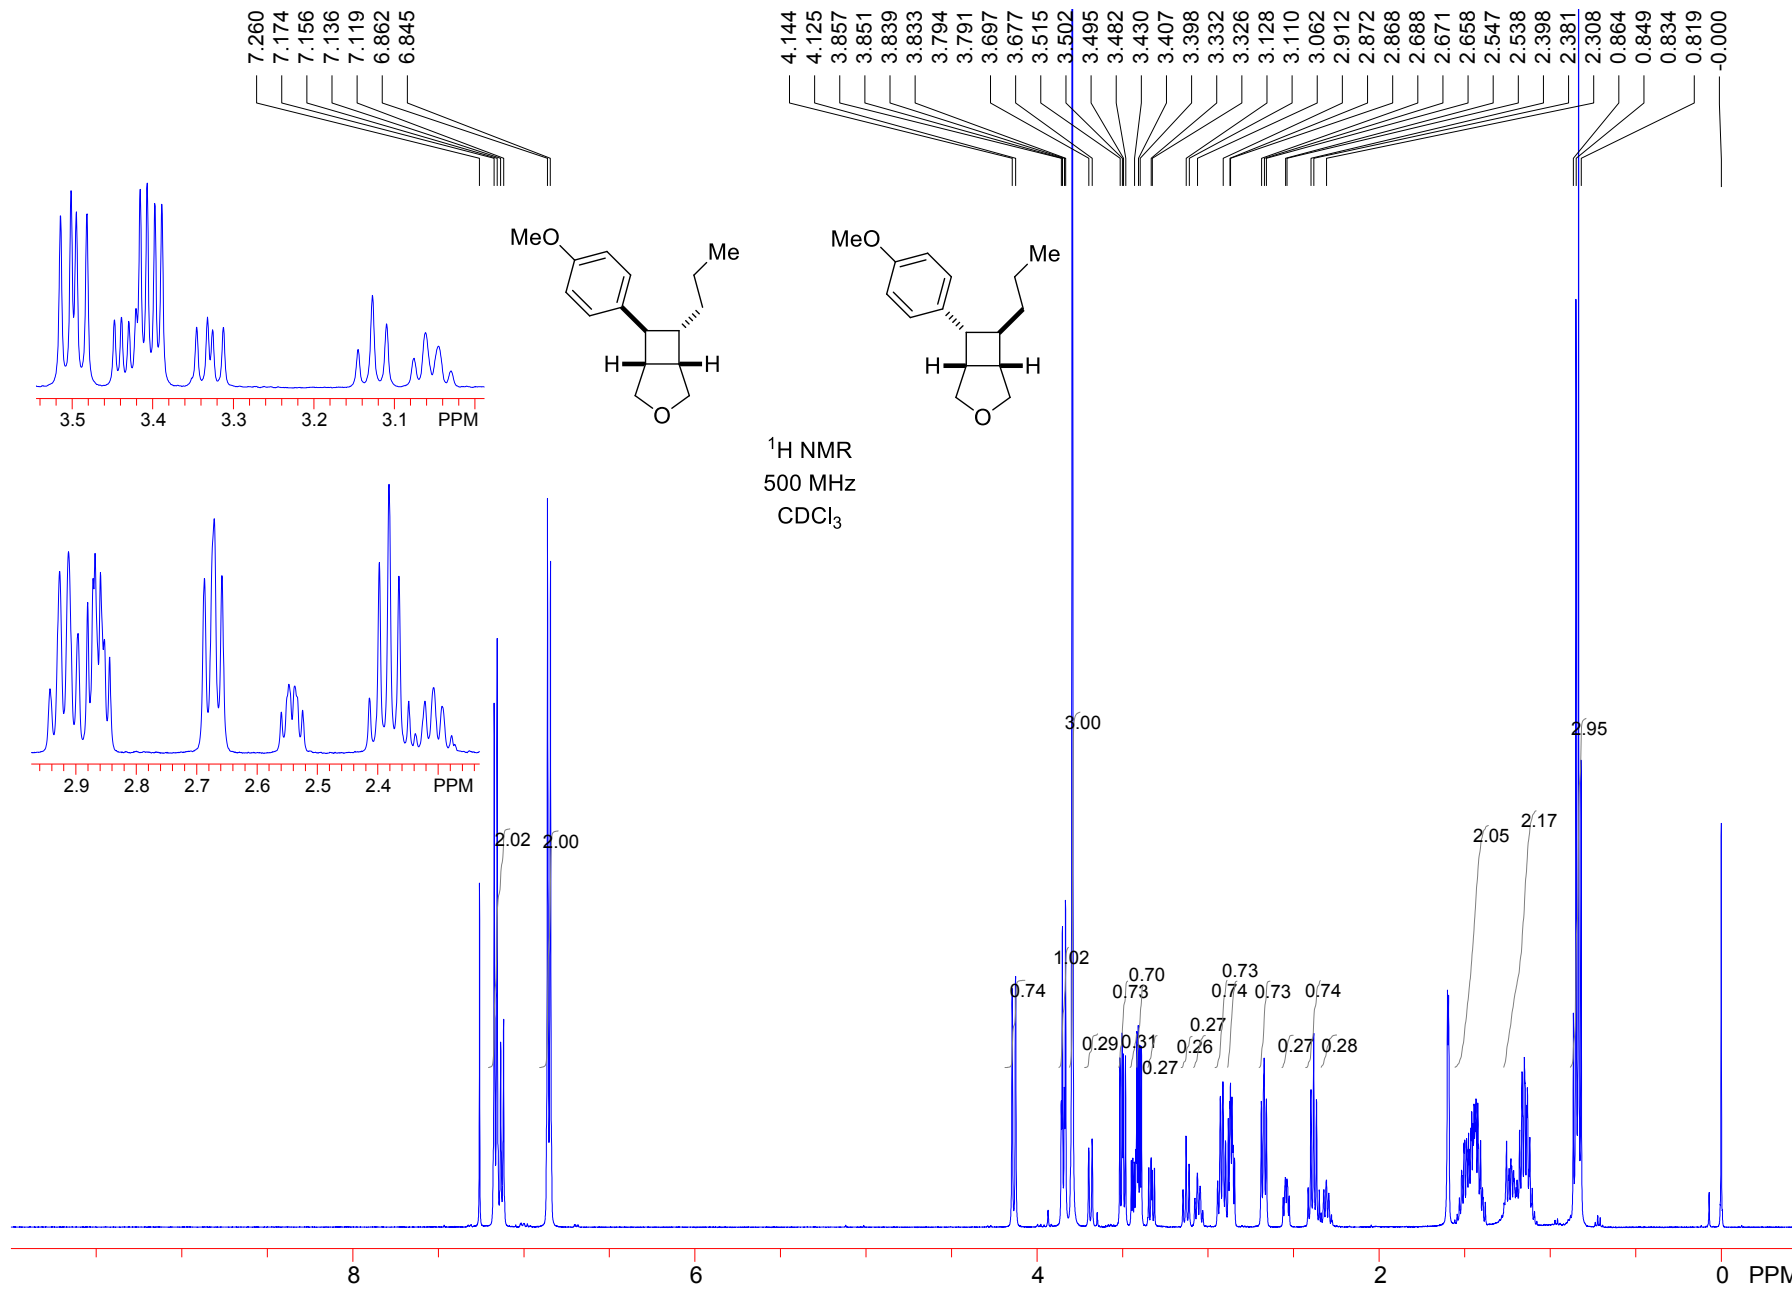

7.417  
7.403  
7.317  
7.302  
7.281  
7.267  
7.253  
7.247  
7.244  
7.233  
7.230  
7.218  
7.216

3.705  
3.694  
3.214  
3.199  
3.181  
3.167  
2.958  
2.924  
2.783  
2.772  
2.769  
2.758

1.528

-0.000

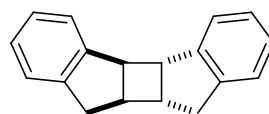

<sup>1</sup>H NMR  
500 MHz  
CDCl<sub>3</sub>

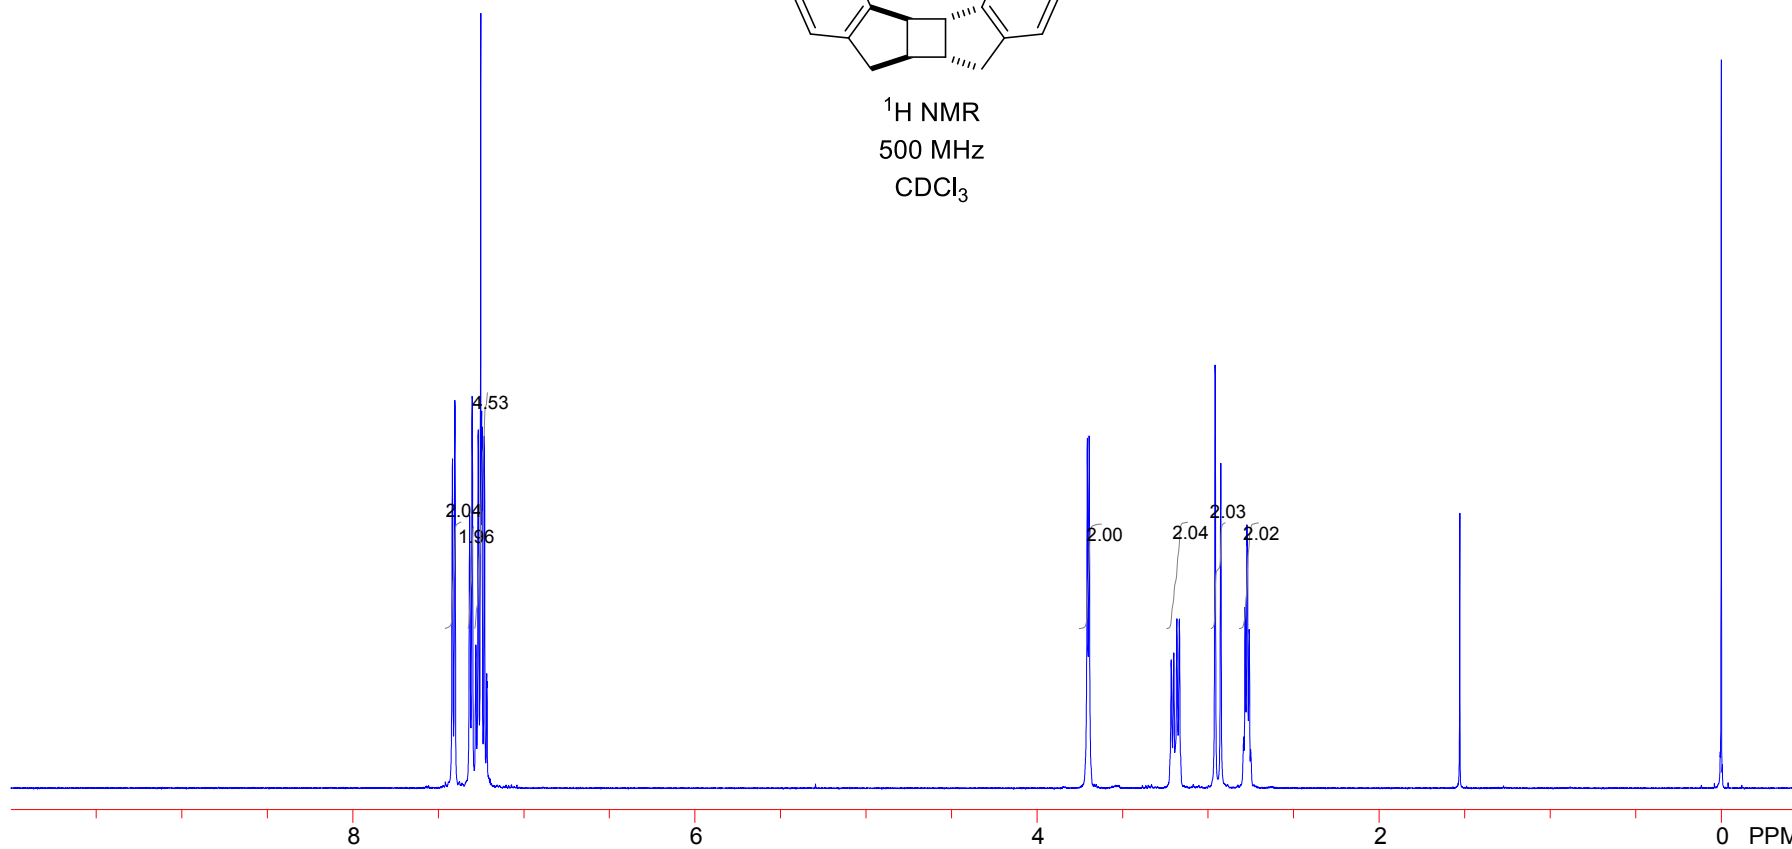



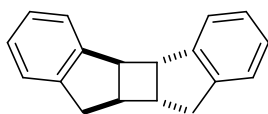

$^{13}\text{C}$  NMR  
125 MHz  
 $\text{CDCl}_3$

146.555  
143.952

126.794  
126.760  
125.445  
125.156

77.253  
77.000  
76.742

53.950

43.144  
39.387

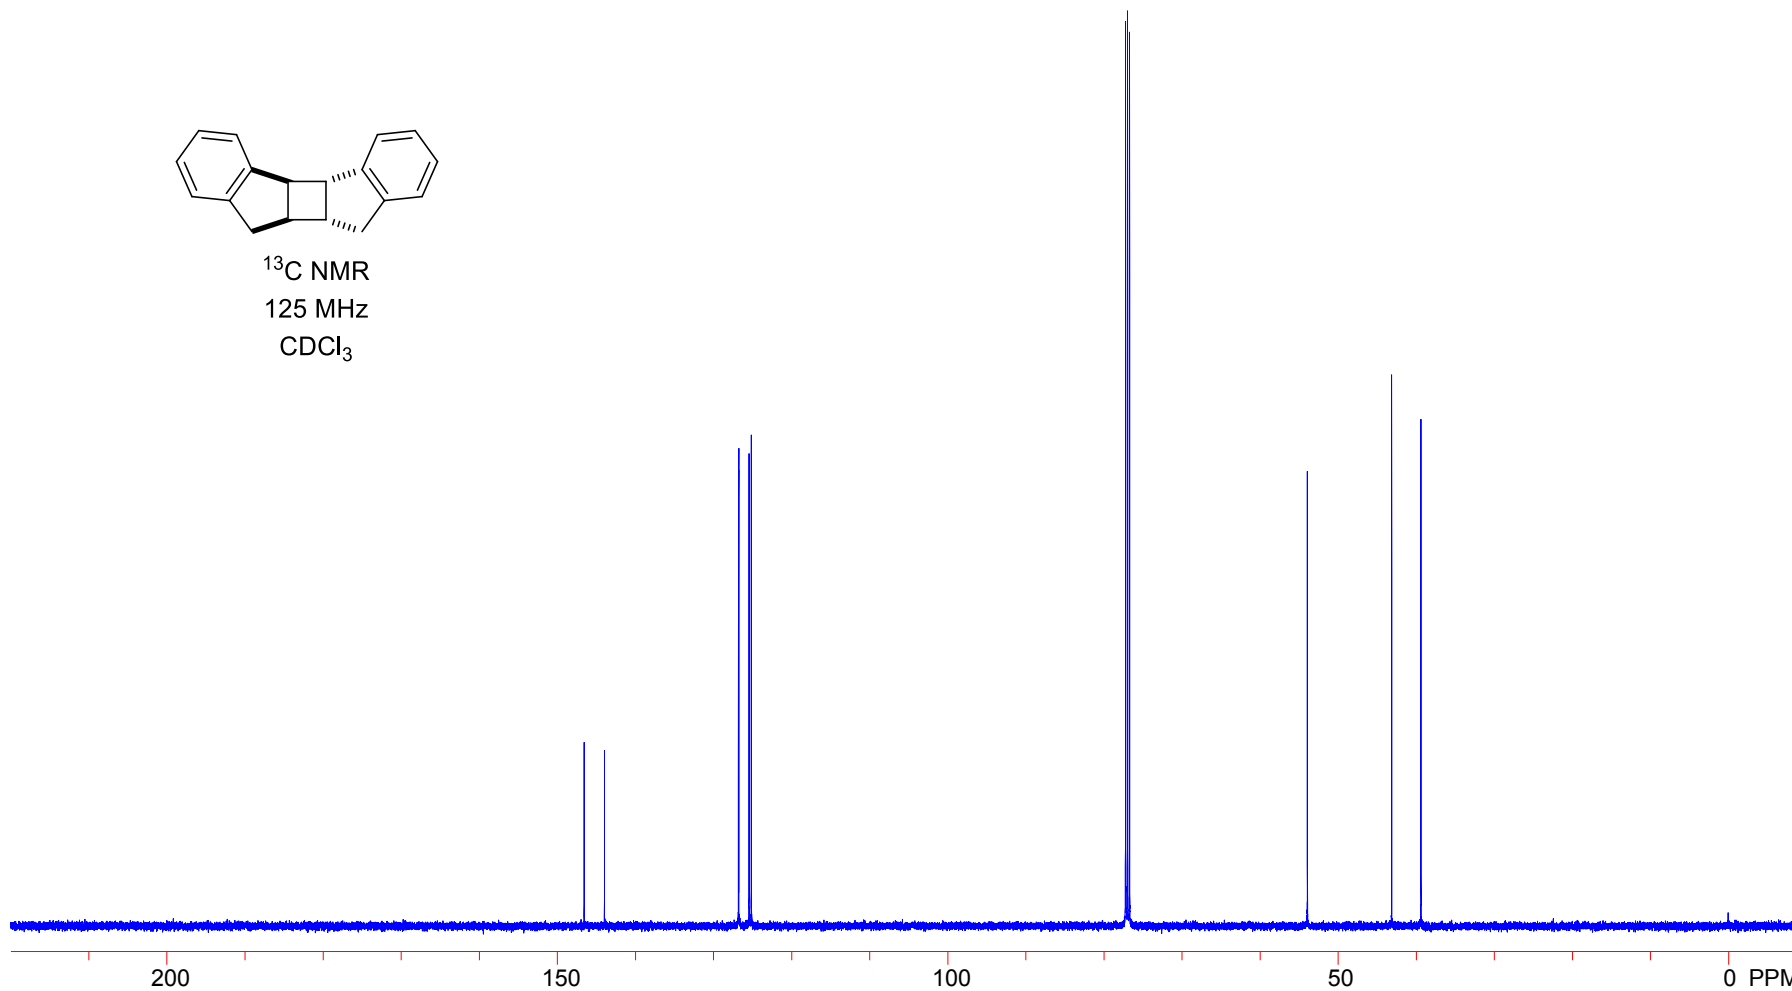

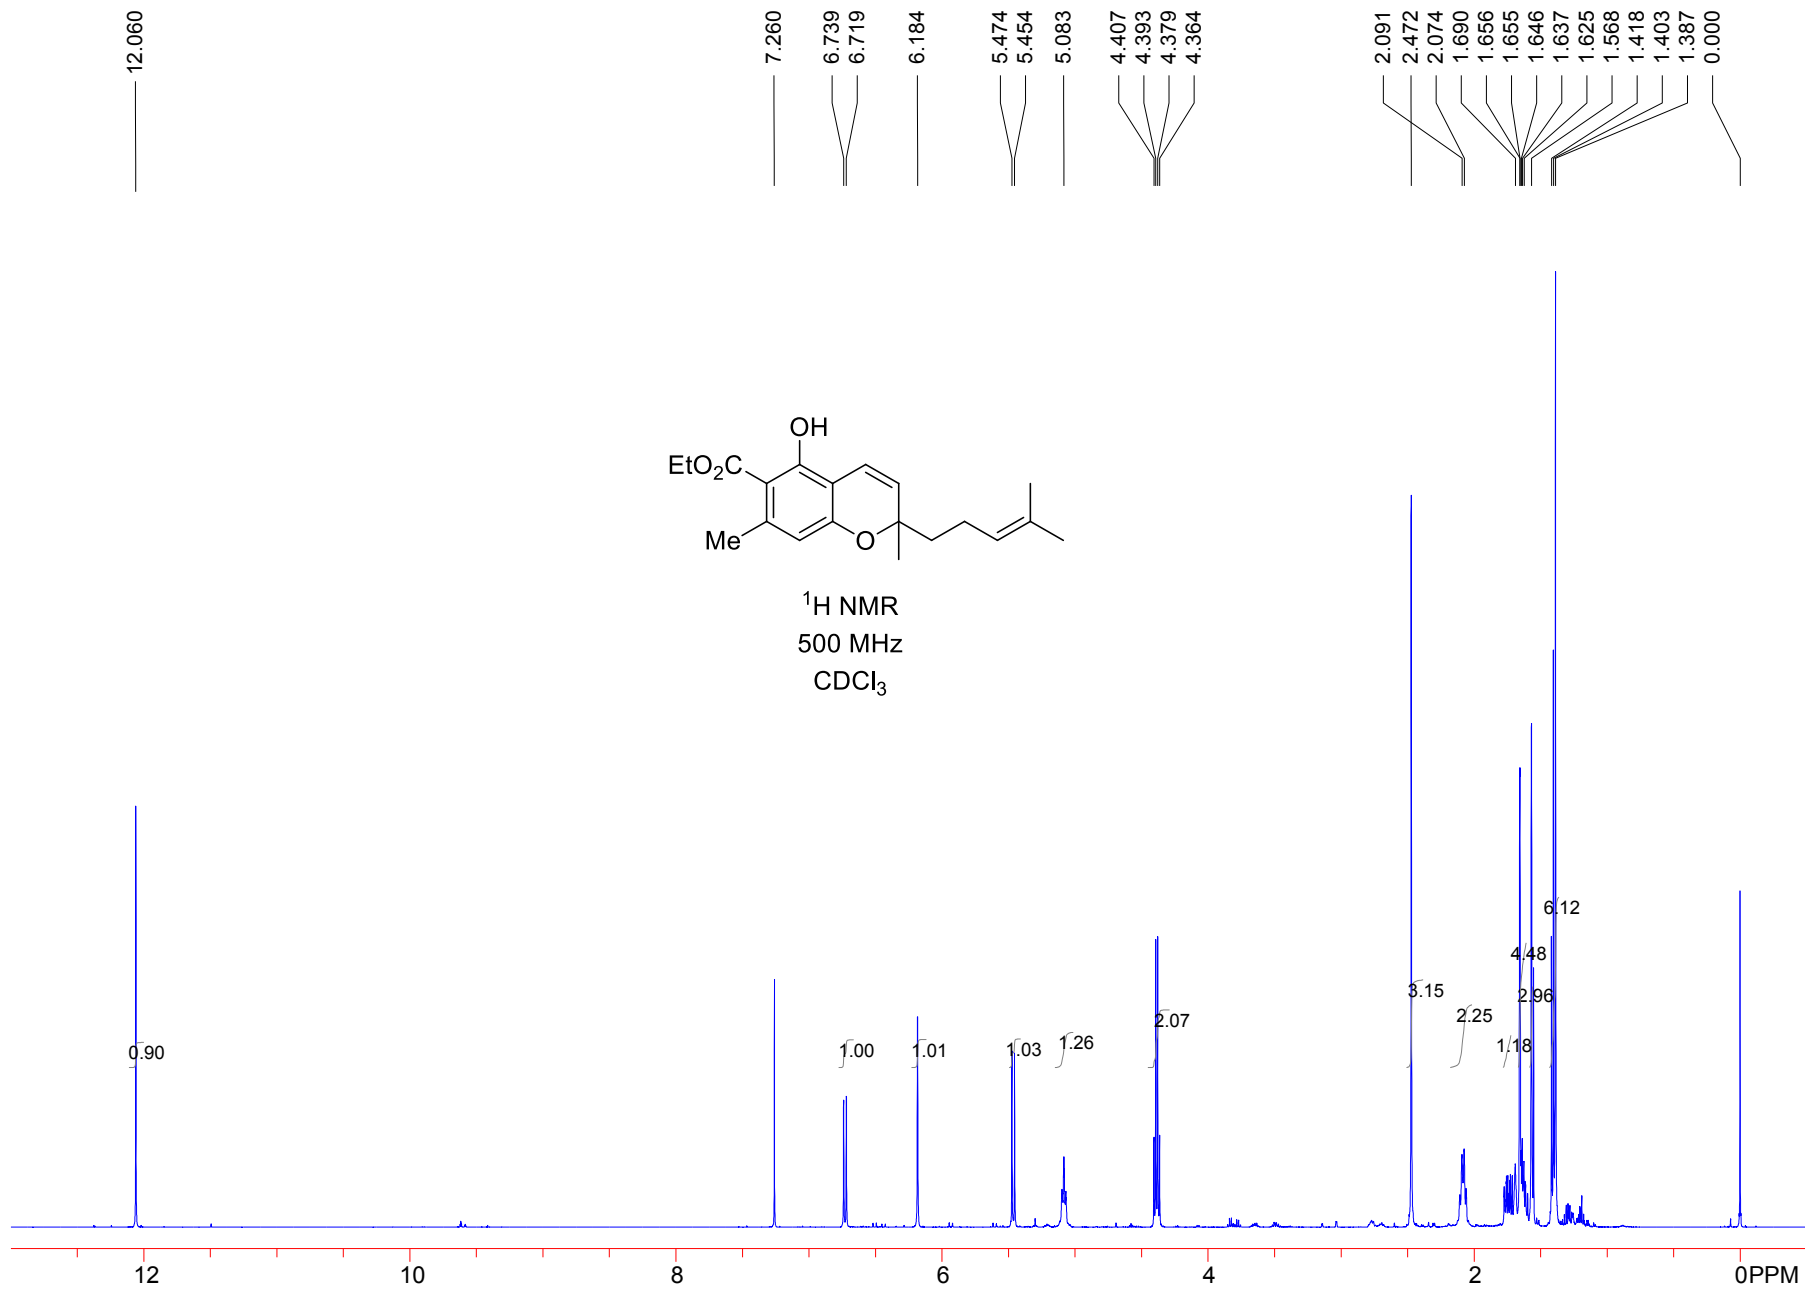

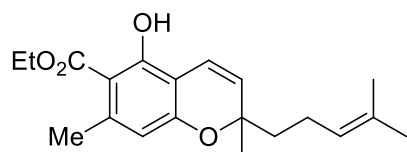

<sup>13</sup>C NMR  
125 MHz  
CDCl<sub>3</sub>

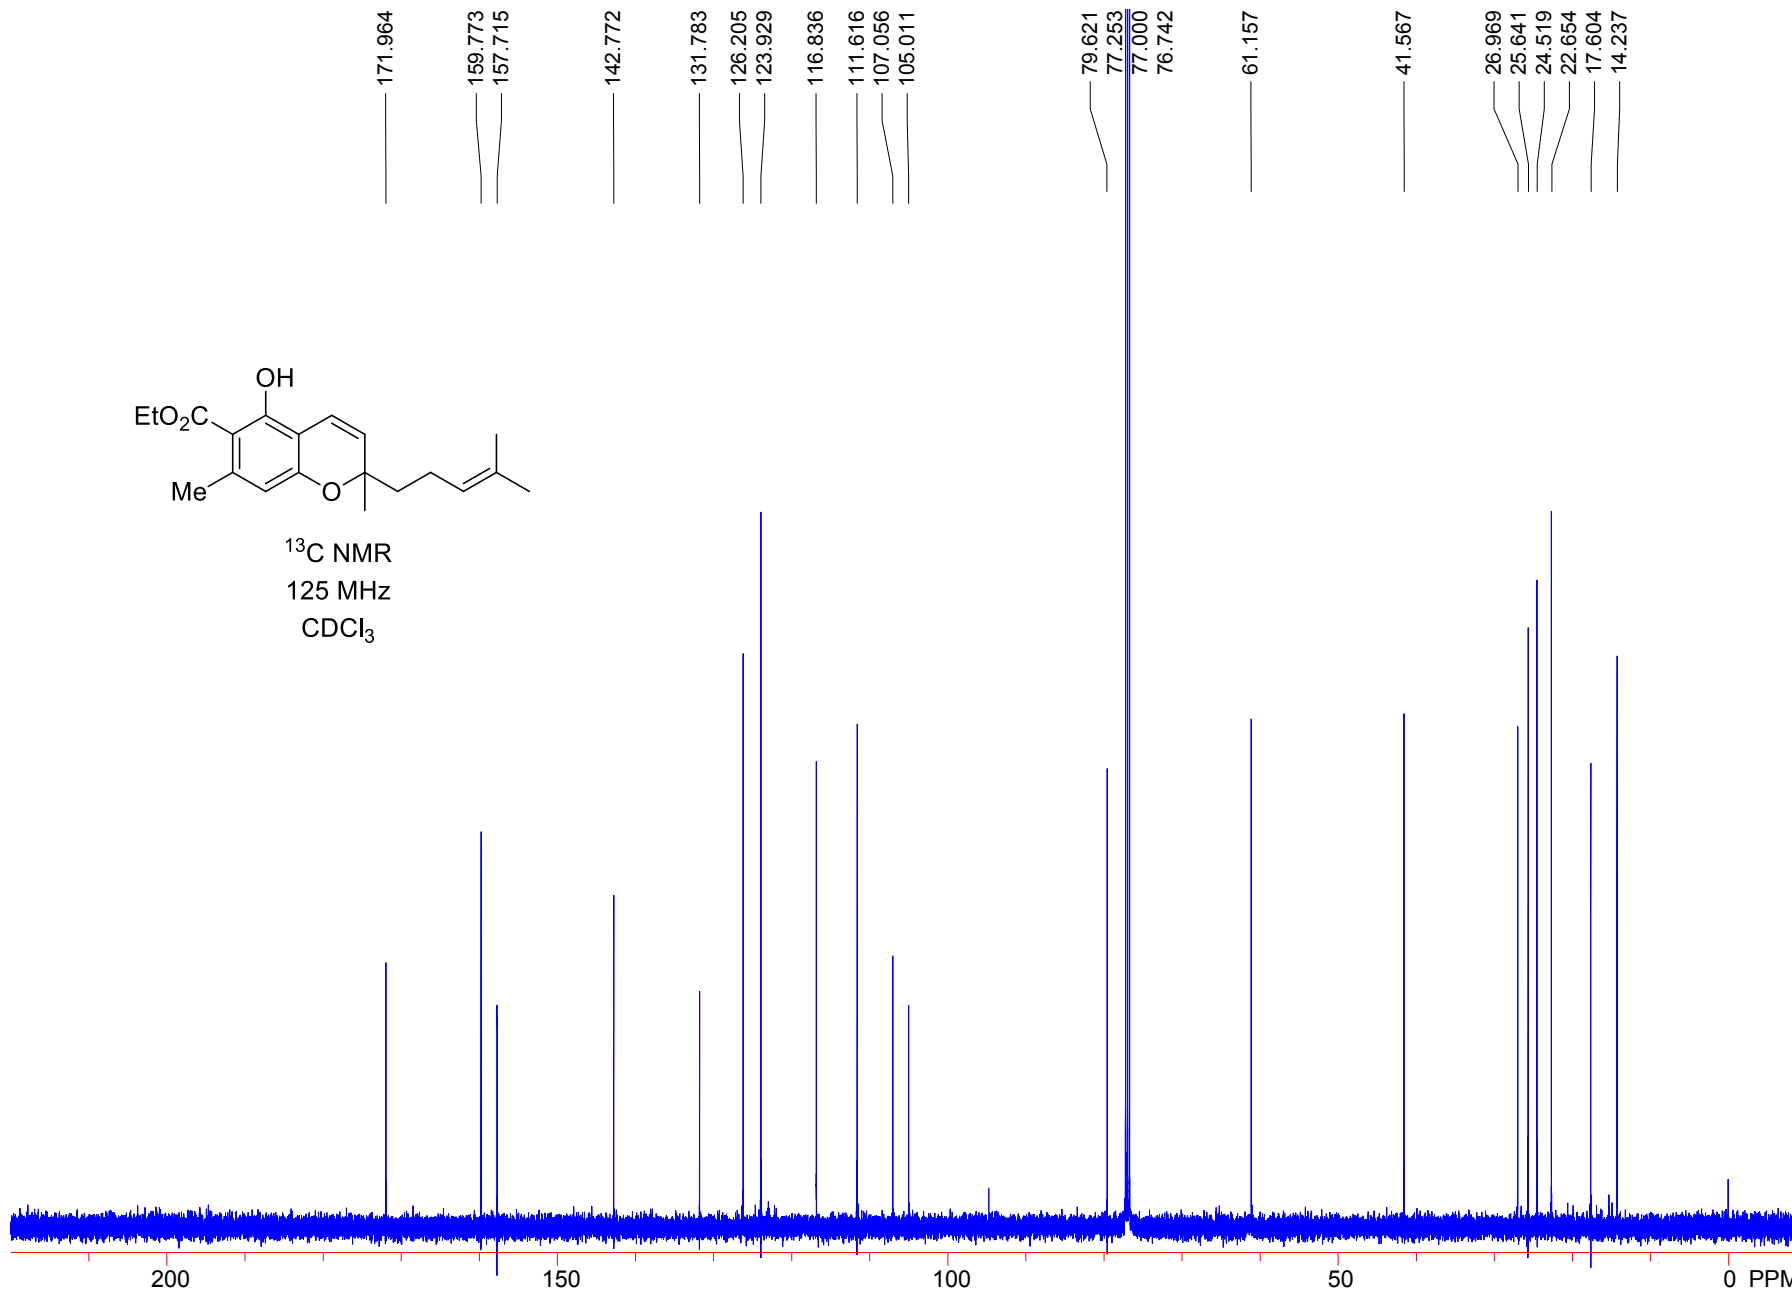

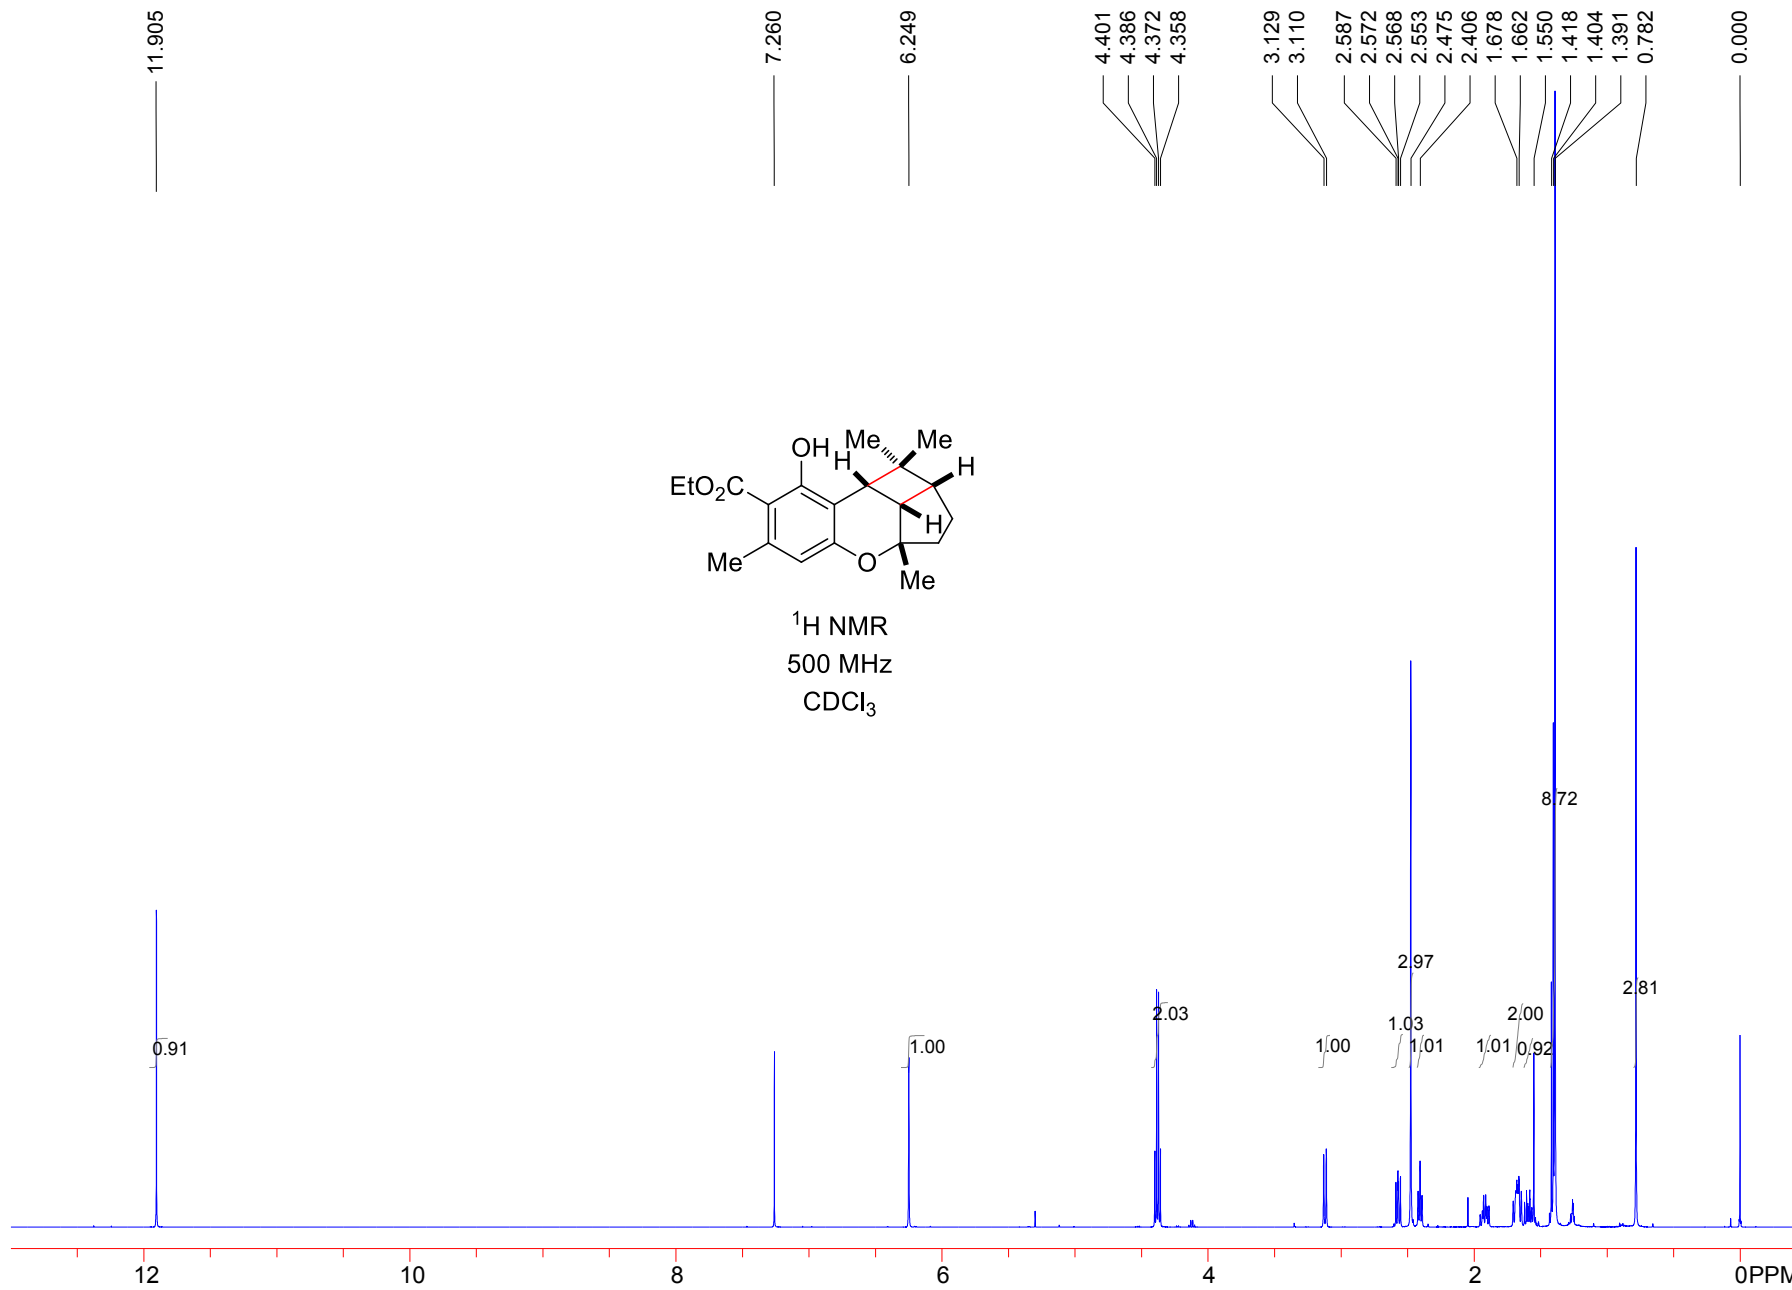

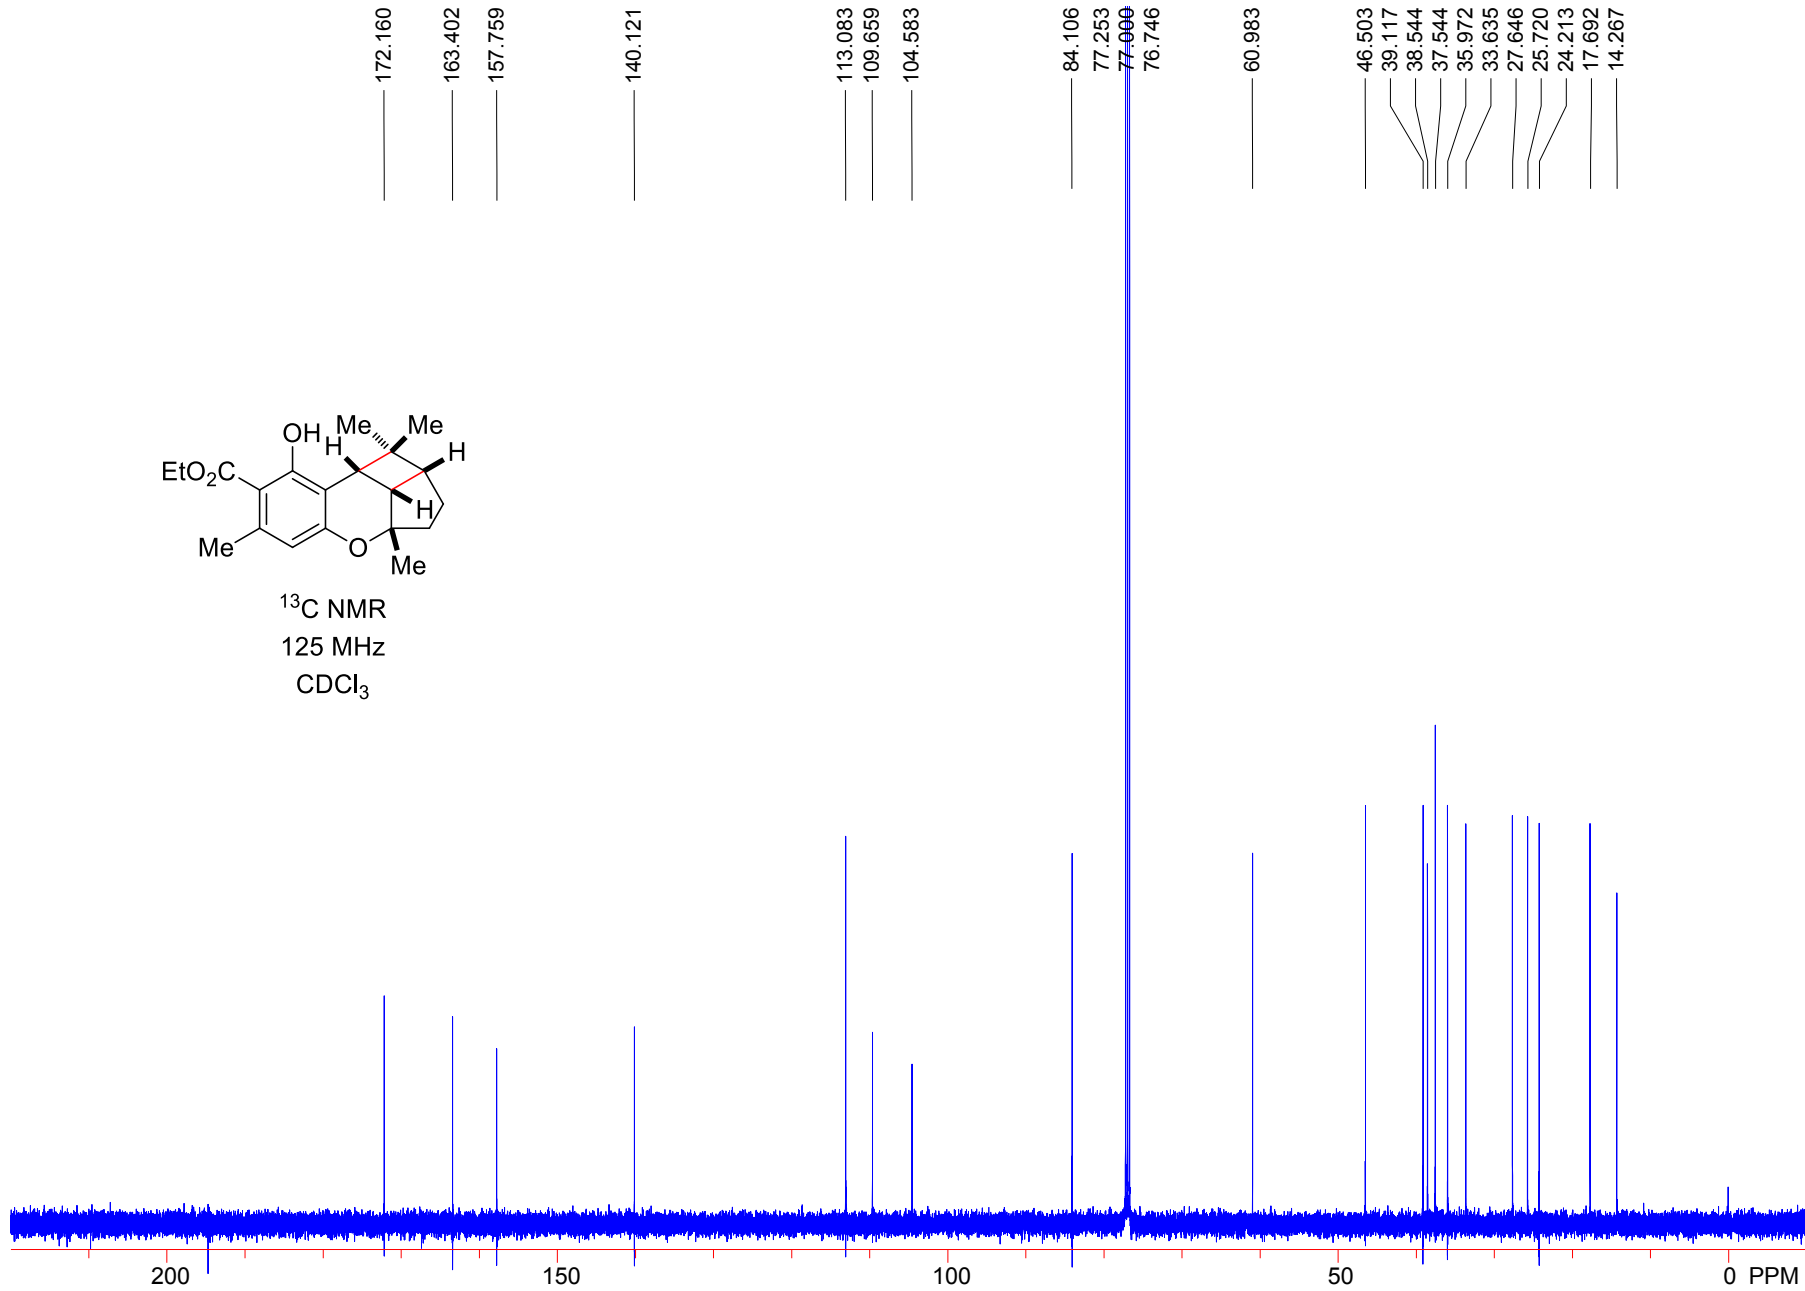

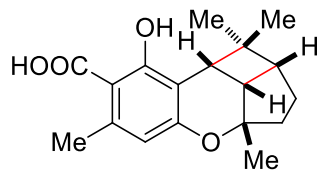

<sup>1</sup>H NMR  
500 MHz  
CDCl<sub>3</sub>

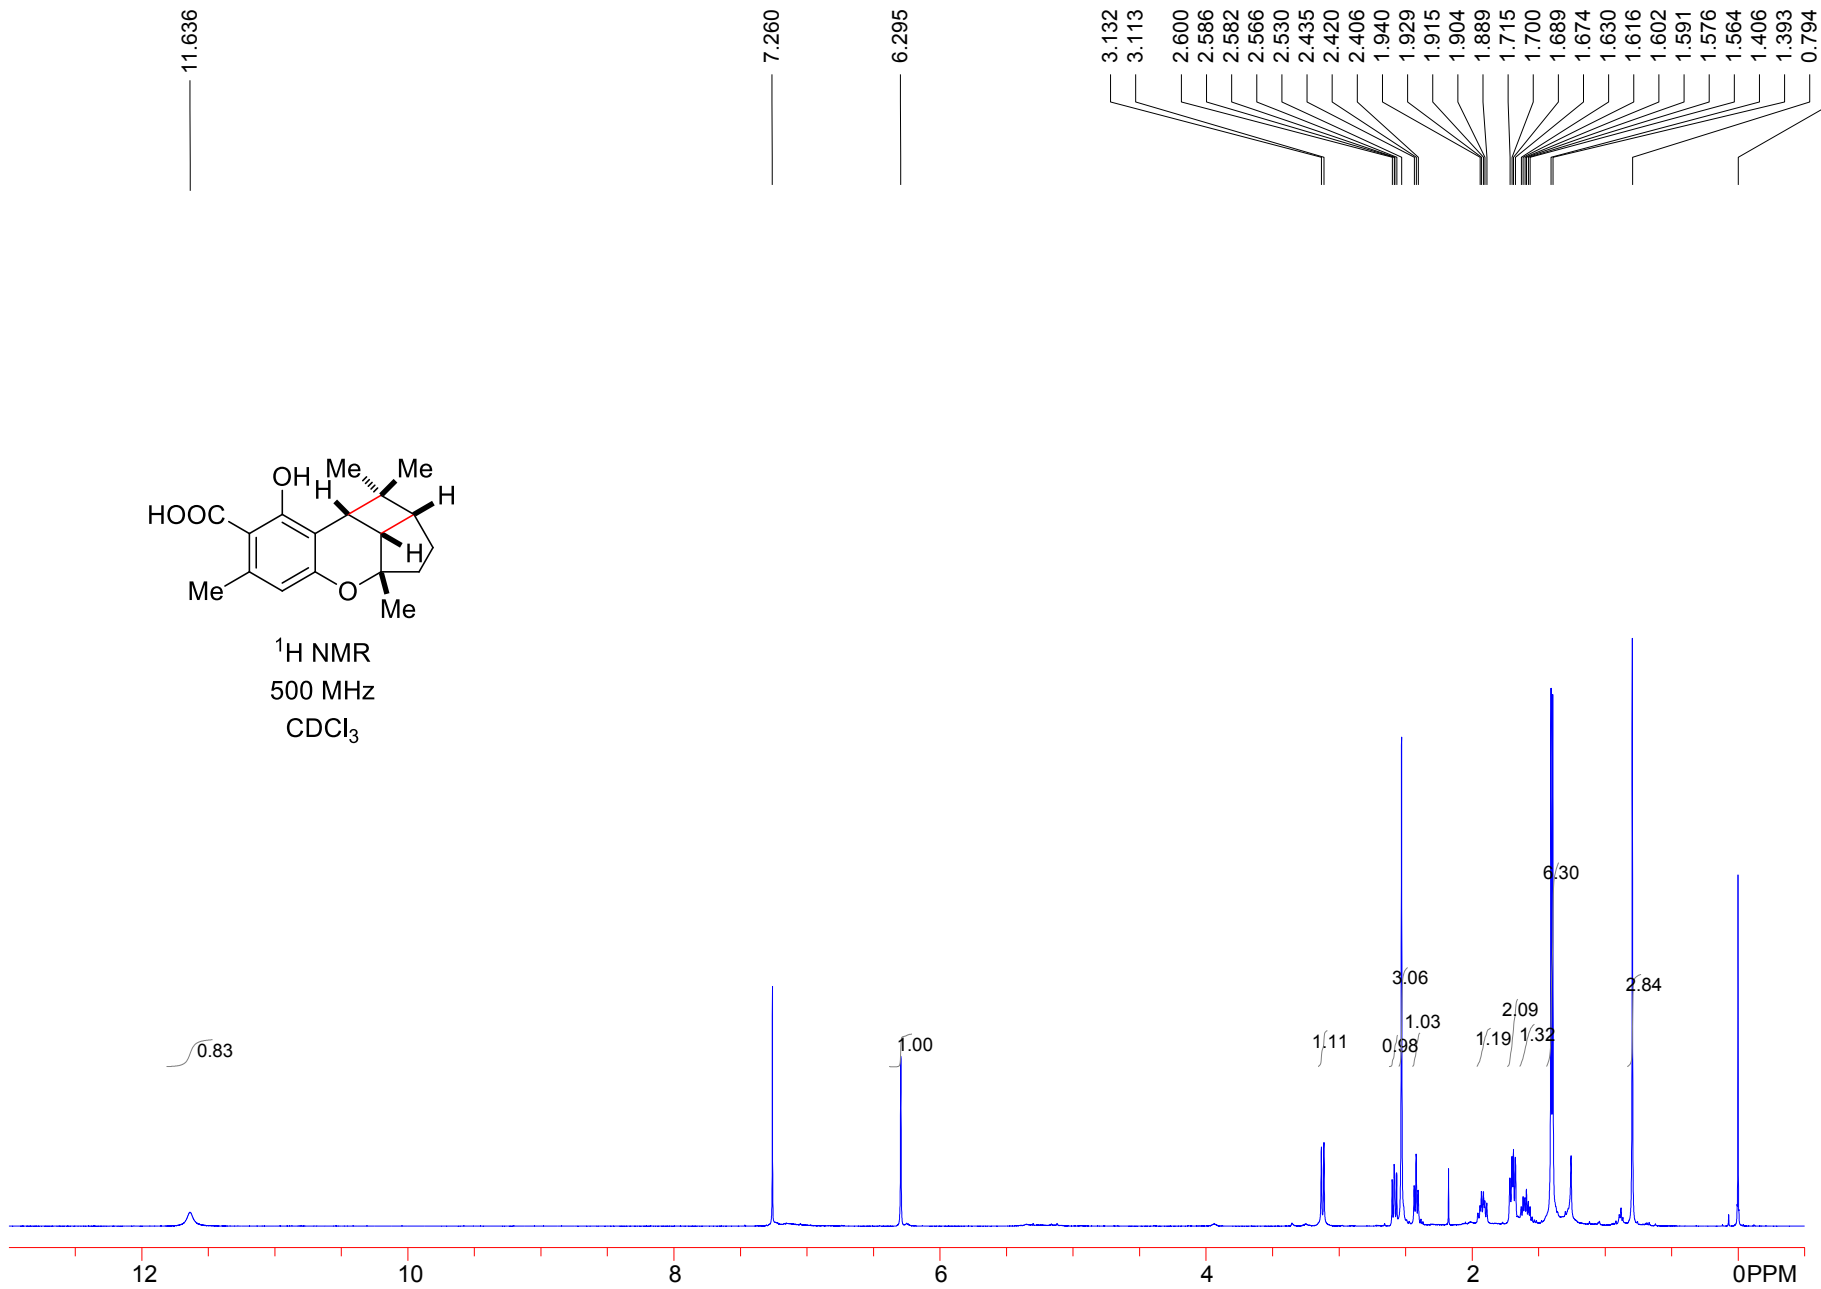

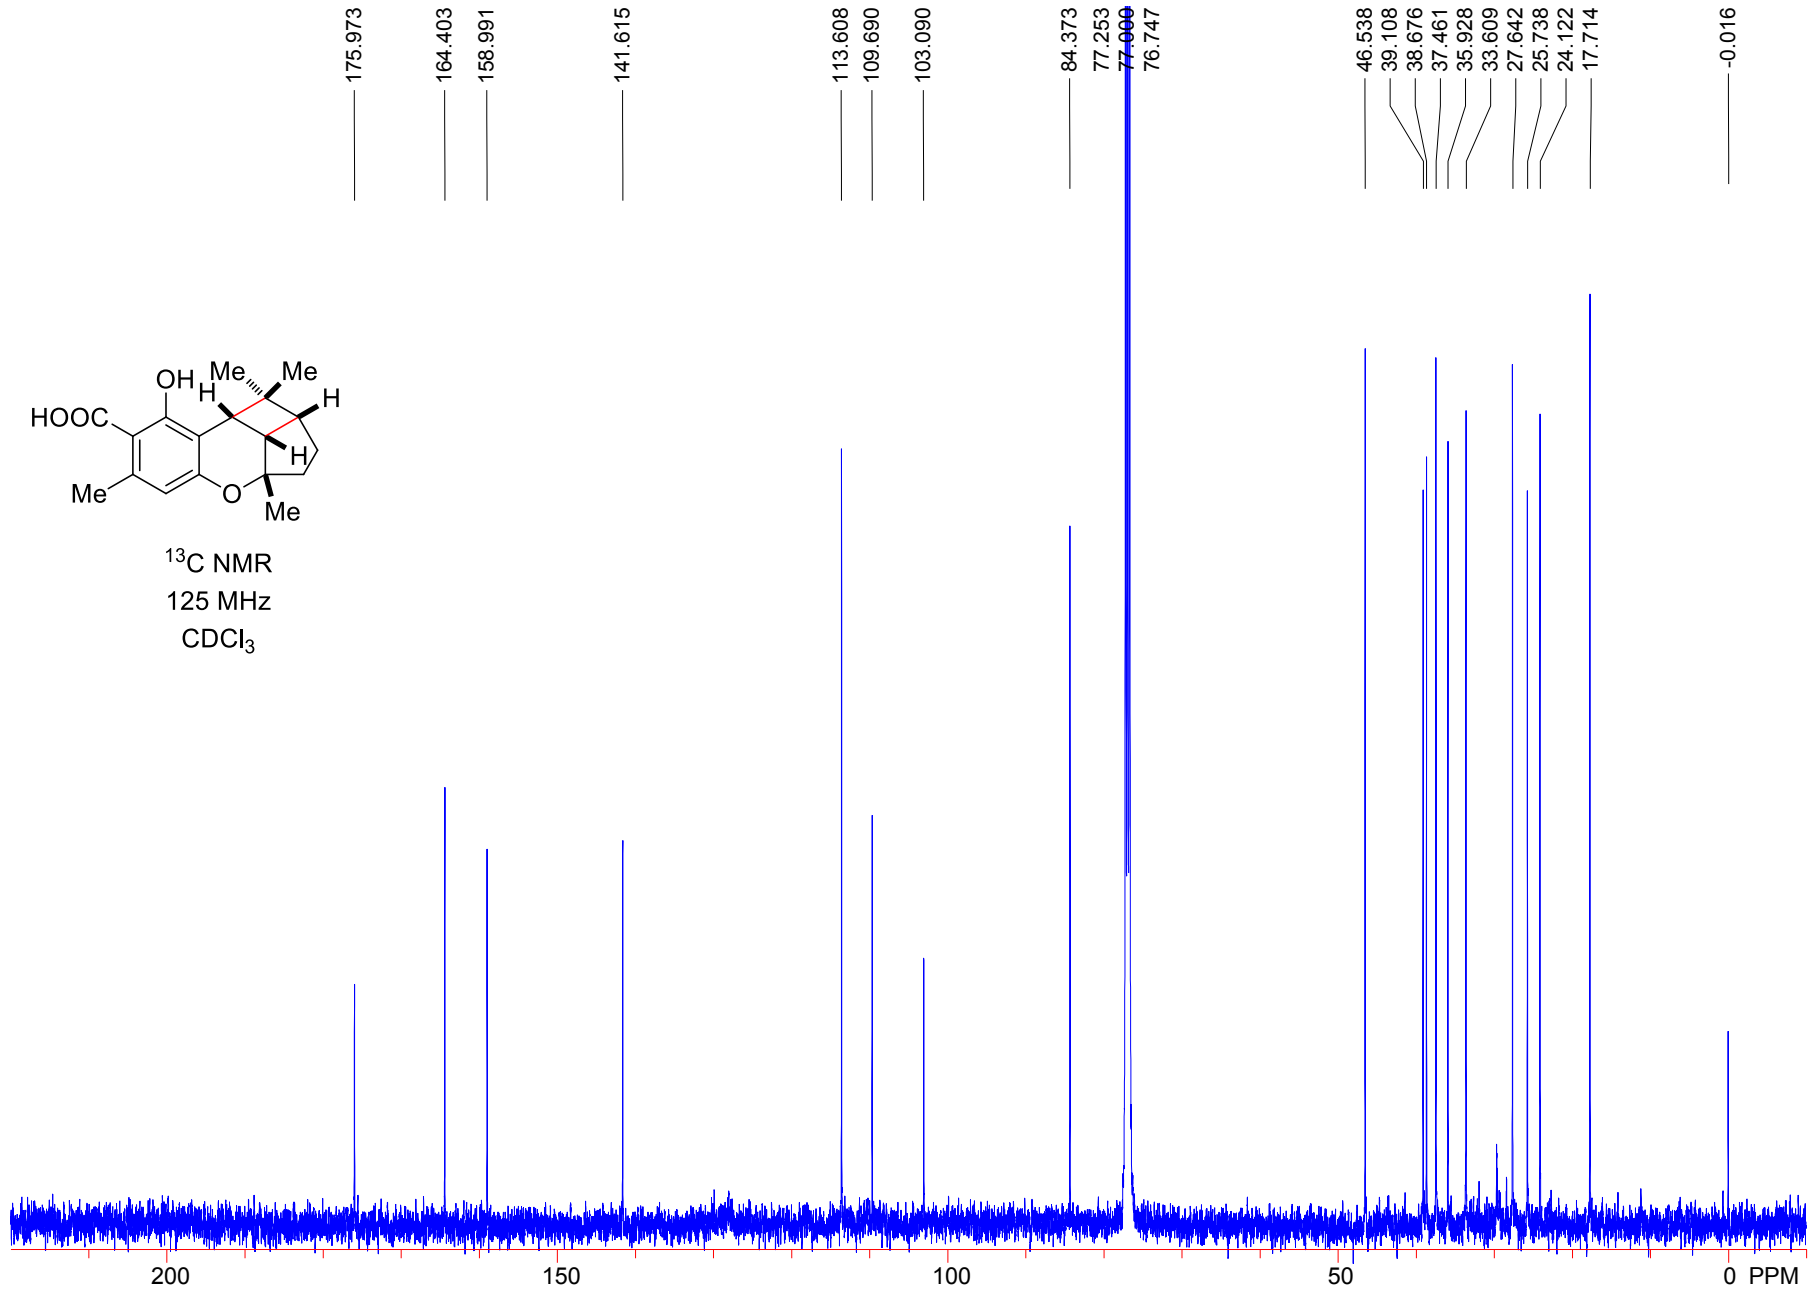

Supplement: NIHMS415538-supplement-Supporting_Information.pdf [file NIHMS415538-supplement-Supporting_Information.pdf]
